# Supplementary material for: Broad functional profiling of fission yeast proteins using phenomics and machine learning
Source: eLife. 2023 Oct 3;12:RP88229. doi: 10.7554/eLife.88229 (PMC10547477; doi:10.7554/eLife.88229)
Supplement: Figure 5—source data 1. [file elife-88229-fig5-data1.xlsx]

## Sheet: CFU_Norm.all
Sample	Time(days)	ColonyFormingUnitsPerDroplet	%viability	Mutants
alg14(1)	24	0.166724	0.00548	alg14
alg14(1)	0	3044.49	100	alg14
alg14(1)	2	311.669	10.2	alg14
alg14(1)	3	87.8621	2.89	alg14
alg14(1)	5	20.9241	0.687	alg14
alg14(1)	6	14.0346	0.461	alg14
alg14(1)	8	5.00182	0.164	alg14
alg14(1)	9	3.53867	0.116	alg14
alg14(1)	18	0	0	alg14
alg14(1)	21	0.171476	0.00563	alg14
alg14(1)	17	0.377469	0.0124	alg14
alg14(1)	11	5.00182	0.164	alg14
alg14(1)	13	1.39481	0.0458	alg14
alg14(1)	14	1.49794	0.0492	alg14
alg14(1)	26	0.166724	0.00548	alg14
alg14(2)	24	0.334483	0.00373	alg14
alg14(2)	0	8972.54	100	alg14
alg14(2)	2	895.609	9.98	alg14
alg14(2)	3	305.626	3.41	alg14
alg14(2)	5	10.962	0.122	alg14
alg14(2)	6	14.8478	0.165	alg14
alg14(2)	8	0.9413	0.0105	alg14
alg14(2)	9	1.09862	0.0122	alg14
alg14(2)	19	0	0	alg14
alg14(2)	21	0	0	alg14
alg14(2)	17	0	0	alg14
alg14(2)	11	0.405466	0.00452	alg14
alg14(2)	13	0.693149	0.00773	alg14
alg14(2)	15	0.182322	2.03e-05	alg14
alg14(2)	26	0.166724	0.00186	alg14
alg14(3)	24	0.182322	0.00135	alg14
alg14(3)	0	13496	100	alg14
alg14(3)	2	175.469	1.3	alg14
alg14(3)	3	7.37302	0.0546	alg14
alg14(3)	5	1.16903	0.00866	alg14
alg14(3)	6	0.737571	0.00547	alg14
alg14(3)	8	0.635288	0.00471	alg14
alg14(3)	9	0	0	alg14
alg14(3)	19	0	0	alg14
alg14(3)	17	0	0	alg14
alg14(3)	10	0.16823	1.25e-05	alg14
alg14(3)	13	0	0	alg14
alg14(3)	14	0	0	alg14
alg14(3)	26	0	0	alg14
gut2(1)	24	0	0	gut2
gut2(1)	0	22903.2	100	gut2
gut2(1)	2	1728.25	7.55	gut2
gut2(1)	3	25.5817	0.112	gut2
gut2(1)	5	3.2492	0.0142	gut2
gut2(1)	6	3.56748	0.0156	gut2
gut2(1)	8	3.32862	0.0145	gut2
gut2(1)	9	1.89839	0.00829	gut2
gut2(1)	19	0.182323	0.000796	gut2
gut2(1)	21	0	0	gut2
gut2(1)	17	0.171476	0.000749	gut2
gut2(1)	14	0.405466	0.00177	gut2
gut2(1)	15	0.405466	1.77e-06	gut2
gut2(1)	26	0.339664	0.000148	gut2
gut2(2)	25	0	0	gut2
gut2(2)	0	6824.1	100	gut2
gut2(2)	1	2439.72	35.8	gut2
gut2(2)	3	81.4254	1.19	gut2
gut2(2)	4	135.083	1.98	gut2
gut2(2)	6	4.03133	0.0591	gut2
gut2(2)	7	2.30186	0.0337	gut2
gut2(2)	9	1.84342	0.027	gut2
gut2(2)	10	0.635288	0.00931	gut2
gut2(2)	20	0	0	gut2
gut2(2)	22	0.16823	0.00247	gut2
gut2(2)	18	0	0	gut2
gut2(2)	12	0.635288	0.00931	gut2
gut2(2)	14	0.528457	0.00774	gut2
gut2(2)	15	0.614808	0.00901	gut2
gut2(2)	27	0	0	gut2
gut2(3)	25	0	0	gut2
gut2(3)	0	20787.2	100	gut2
gut2(3)	1	8329.4	40.1	gut2
gut2(3)	3	810.489	3.9	gut2
gut2(3)	4	89.9195	0.433	gut2
gut2(3)	6	28.5211	0.137	gut2
gut2(3)	7	14.3663	0.0691	gut2
gut2(3)	9	3.8574	0.0186	gut2
gut2(3)	10	6.96942	0.0335	gut2
gut2(3)	20	0.377469	0.00182	gut2
gut2(3)	18	0	0	gut2
gut2(3)	12	2.21796	0.0107	gut2
gut2(3)	14	1.41907	0.00683	gut2
gut2(3)	15	0.570103	0.00274	gut2
htr11(1)	24	0.377469	0.00227	htr11
htr11(1)	0	16610.9	100	htr11
htr11(1)	2	3619.92	21.8	htr11
htr11(1)	3	55.2734	0.333	htr11
htr11(1)	5	2.85362	0.0172	htr11
htr11(1)	6	4.03133	0.0243	htr11
htr11(1)	8	1.69036	0.0102	htr11
htr11(1)	9	1.26358	0.00761	htr11
htr11(1)	19	0	0	htr11
htr11(1)	21	0.369458	0.00222	htr11
htr11(1)	17	0.570103	0.00343	htr11
htr11(1)	11	2.13627	0.0129	htr11
htr11(1)	13	1.42445	0.00858	htr11
htr11(1)	14	1.87067	0.0113	htr11
htr11(1)	26	0.182322	0.0011	htr11
htr11(2)	25	0	0	htr11
htr11(2)	0	18319.4	100	htr11
htr11(2)	1	4190.82	22.9	htr11
htr11(2)	3	4570.9	25	htr11
htr11(2)	4	42.1066	0.23	htr11
htr11(2)	6	4.51676	0.0247	htr11
htr11(2)	7	5.18333	0.0283	htr11
htr11(2)	9	0.842393	0.0046	htr11
htr11(2)	10	0.635288	0.00347	htr11
htr11(2)	20	0.171476	0.000936	htr11
htr11(2)	18	0.405466	0.00221	htr11
htr11(2)	12	0.864575	0.00472	htr11
htr11(2)	14	0.635288	0.00347	htr11
htr11(2)	15	0.171476	9.36e-05	htr11
htr11(2)	27	0.182322	9.95e-05	htr11
htr11(3)	25	0	0	htr11
htr11(3)	0	32999.2	100	htr11
htr11(3)	1	9246.78	28	htr11
htr11(3)	3	1321.41	4	htr11
htr11(3)	4	228.798	0.693	htr11
htr11(3)	6	36.286	0.11	htr11
htr11(3)	7	6.06107	0.0184	htr11
htr11(3)	9	1.62611	0.00493	htr11
htr11(3)	10	1.91541	0.0058	htr11
htr11(3)	20	0.182322	0.000553	htr11
htr11(3)	18	0	0	htr11
htr11(3)	12	1.43691	0.00435	htr11
htr11(3)	14	0.182322	0.000553	htr11
htr11(3)	15	0.36691	0.000111	htr11
htr11(3)	27	0.171476	5.2e-05	htr11
htr12(1)	25	0	0	htr12
htr12(1)	0	3619.92	100	htr12
htr12(1)	1	3129.09	86.4	htr12
htr12(1)	3	4012.47	111	htr12
htr12(1)	4	80.8978	2.23	htr12
htr12(1)	6	16.59	0.458	htr12
htr12(1)	7	9.23715	0.255	htr12
htr12(1)	9	2.82017	0.0779	htr12
htr12(1)	10	1.99684	0.0552	htr12
htr12(1)	20	0.334714	0.00925	htr12
htr12(1)	22	0.171476	0.000474	htr12
htr12(1)	18	0.171476	0.000474	htr12
htr12(1)	12	6.06107	0.167	htr12
htr12(1)	14	0.979626	0.0271	htr12
htr12(1)	15	6.06107	0.167	htr12
htr12(1)	27	0	0	htr12
htr12(2)	25	0	0	htr12
htr12(2)	0	20578.9	100	htr12
htr12(2)	1	3671.46	17.8	htr12
htr12(2)	3	16999.5	82.6	htr12
htr12(2)	4	21.264	0.103	htr12
htr12(2)	6	6.06107	0.0295	htr12
htr12(2)	7	4.83683	0.0235	htr12
htr12(2)	9	0.635288	0.00309	htr12
htr12(2)	10	1.30731	0.00635	htr12
htr12(2)	20	0.16823	0.000817	htr12
htr12(2)	18	0.182322	8.86e-05	htr12
htr12(2)	12	1.84118	0.00895	htr12
htr12(2)	14	0.377469	0.000183	htr12
htr12(2)	15	0.635288	0.000309	htr12
htr12(2)	27	0.339664	0.00165	htr12
htr12(3)	24	0	0	htr12
htr12(3)	0	20578.9	100	htr12
htr12(3)	2	1010.72	4.91	htr12
htr12(3)	3	248.499	1.21	htr12
htr12(3)	5	6.92245	0.0336	htr12
htr12(3)	6	6.06107	0.0295	htr12
htr12(3)	8	1.09862	0.00534	htr12
htr12(3)	9	4.03133	0.0196	htr12
htr12(3)	19	0.182322	8.86e-05	htr12
htr12(3)	18	0	0	htr12
htr12(3)	11	1.26358	0.00614	htr12
htr12(3)	13	0.74841	0.00364	htr12
htr12(3)	14	0.619685	0.00301	htr12
htr12(3)	26	0	0	htr12
mgl1(1)	25	0	0	mgl1
mgl1(1)	0	13656.3	100	mgl1
mgl1(1)	1	21043.5	154	mgl1
mgl1(1)	3	4570.9	33.5	mgl1
mgl1(1)	4	42.1766	0.309	mgl1
mgl1(1)	6	5.69865	0.0417	mgl1
mgl1(1)	7	3.5115	0.0257	mgl1
mgl1(1)	9	3.07708	0.0225	mgl1
mgl1(1)	10	3.65339	0.0268	mgl1
mgl1(1)	20	0.171476	0.00126	mgl1
mgl1(1)	22	0.182322	0.00134	mgl1
mgl1(1)	18	0.166839	0.00122	mgl1
mgl1(1)	12	0.377469	0.000276	mgl1
mgl1(1)	14	0.405466	0.000297	mgl1
mgl1(1)	15	0.182322	0.000134	mgl1
mgl1(1)	27	0.251315	0.000184	mgl1
mgl1(2)	25	0	0	mgl1
mgl1(2)	0	6180.8	100	mgl1
mgl1(2)	1	599.24	9.7	mgl1
mgl1(2)	3	202.731	3.28	mgl1
mgl1(2)	4	197.577	3.2	mgl1
mgl1(2)	6	12.4532	0.201	mgl1
mgl1(2)	7	6.21921	0.101	mgl1
mgl1(2)	9	8.83731	0.143	mgl1
mgl1(2)	10	4.67808	0.0757	mgl1
mgl1(2)	20	0.346368	5.6e-05	mgl1
mgl1(2)	22	0.171476	0.000277	mgl1
mgl1(2)	18	0.979626	0.0158	mgl1
mgl1(2)	12	2.5833	0.0418	mgl1
mgl1(2)	14	1.65111	0.0267	mgl1
mgl1(2)	15	0.693149	0.0112	mgl1
mgl1(2)	27	0	0	mgl1
mgl1(3)	25	0	0	mgl1
mgl1(3)	0	16999.5	100	mgl1
mgl1(3)	1	4867.24	28.6	mgl1
mgl1(3)	3	244.353	1.44	mgl1
mgl1(3)	4	163.705	0.963	mgl1
mgl1(3)	6	32.8877	0.193	mgl1
mgl1(3)	7	9.23715	0.0543	mgl1
mgl1(3)	9	9.0459	0.0532	mgl1
mgl1(3)	10	7.50553	0.0442	mgl1
mgl1(3)	20	0	0	mgl1
mgl1(3)	18	0.0771068	0.000454	mgl1
mgl1(3)	12	1.76323	0.0104	mgl1
mgl1(3)	14	0.177469	0.000222	mgl1
mgl1(3)	15	0.1683	0.000222	mgl1
mgl1(3)	27	0.174243	0.000222	mgl1
pac3(1)	24	0.182322	0.00136	pac3
pac3(1)	0	13366.6	100	pac3
pac3(1)	2	2381.19	17.8	pac3
pac3(1)	3	64.1094	0.48	pac3
pac3(1)	5	8.47054	0.0634	pac3
pac3(1)	6	12.6181	0.0944	pac3
pac3(1)	8	6.06107	0.0453	pac3
pac3(1)	9	5.90137	0.0442	pac3
pac3(1)	19	0.979626	0.00733	pac3
pac3(1)	22	0.182322	0.000136	pac3
pac3(1)	17	1.338	0.01	pac3
pac3(1)	11	2.4492	0.0183	pac3
pac3(1)	13	2.71446	0.0203	pac3
pac3(1)	14	9.046	0.0677	pac3
pac3(1)	26	0.182322	0.00136	pac3
pac3(2)	25	0.635288	0.00687	pac3
pac3(2)	0	9246.78	100	pac3
pac3(2)	1	1798.23	19.4	pac3
pac3(2)	3	231.429	2.5	pac3
pac3(2)	4	156.055	1.69	pac3
pac3(2)	6	8.56852	0.0927	pac3
pac3(2)	7	9.046	0.0978	pac3
pac3(2)	9	10.9563	0.118	pac3
pac3(2)	10	2.96397	0.0321	pac3
pac3(2)	20	2.49407	0.027	pac3
pac3(2)	22	1.62611	0.0176	pac3
pac3(2)	18	3.32862	0.036	pac3
pac3(2)	12	6.11624	0.0661	pac3
pac3(2)	14	3.01308	0.0326	pac3
pac3(2)	15	2.41104	0.0261	pac3
pac3(2)	27	0	0	pac3
pac3(3)	25	0.136946	0.000164	pac3
pac3(3)	0	22554.4	100	pac3
pac3(3)	1	6778.99	30.1	pac3
pac3(3)	3	810.489	3.59	pac3
pac3(3)	4	314.267	1.39	pac3
pac3(3)	6	9.98939	0.0443	pac3
pac3(3)	7	24.0115	0.106	pac3
pac3(3)	9	11.0391	0.0489	pac3
pac3(3)	10	7.50553	0.0333	pac3
pac3(3)	20	1.62611	0.00721	pac3
pac3(3)	18	3.2492	0.0144	pac3
pac3(3)	12	3.92088	0.0174	pac3
pac3(3)	14	11.9882	0.0532	pac3
pac3(3)	15	3.2492	0.0144	pac3
pac3(3)	27	1.62612	0.00721	pac3
SPAC12G12.16c(1)	25	0	0	SPAC12G12.16c
SPAC12G12.16c(1)	1	13760.5	82.8	SPAC12G12.16c
SPAC12G12.16c(1)	0	16610.9	100	SPAC12G12.16c
SPAC12G12.16c(1)	3	5135.98	30.9	SPAC12G12.16c
SPAC12G12.16c(1)	4	305.626	1.84	SPAC12G12.16c
SPAC12G12.16c(1)	6	34.9954	0.211	SPAC12G12.16c
SPAC12G12.16c(1)	7	14.4403	0.0869	SPAC12G12.16c
SPAC12G12.16c(1)	9	4.15085	0.025	SPAC12G12.16c
SPAC12G12.16c(1)	10	4.47852	0.027	SPAC12G12.16c
SPAC12G12.16c(1)	20	0	0	SPAC12G12.16c
SPAC12G12.16c(1)	22	0	0	SPAC12G12.16c
SPAC12G12.16c(1)	12	1.26358	0.00761	SPAC12G12.16c
SPAC12G12.16c(1)	14	0.377469	0.00227	SPAC12G12.16c
SPAC12G12.16c(1)	15	0.635288	0.00382	SPAC12G12.16c
SPAC12G12.16c(2)	24	0	0	SPAC12G12.16c
SPAC12G12.16c(2)	0	11169.3	100	SPAC12G12.16c
SPAC12G12.16c(2)	2	4461.83	39.9	SPAC12G12.16c
SPAC12G12.16c(2)	3	608.707	5.45	SPAC12G12.16c
SPAC12G12.16c(2)	5	33.1185	0.297	SPAC12G12.16c
SPAC12G12.16c(2)	6	7.96992	0.0714	SPAC12G12.16c
SPAC12G12.16c(2)	8	4.83683	0.0433	SPAC12G12.16c
SPAC12G12.16c(2)	9	4.67808	0.0419	SPAC12G12.16c
SPAC12G12.16c(2)	20	0	0	SPAC12G12.16c
SPAC12G12.16c(2)	21	0	0	SPAC12G12.16c
SPAC12G12.16c(2)	17	0	0	SPAC12G12.16c
SPAC12G12.16c(2)	11	1.99684	0.0179	SPAC12G12.16c
SPAC12G12.16c(2)	13	1.30731	0.0117	SPAC12G12.16c
SPAC12G12.16c(2)	14	0.171476	0.00154	SPAC12G12.16c
SPAC12G12.16c(2)	26	0.182322	0.00163	SPAC12G12.16c
SPAC12G12.16c(3)	25	0	0	SPAC12G12.16c
SPAC12G12.16c(3)	0	13366.6	100	SPAC12G12.16c
SPAC12G12.16c(3)	1	2955.99	22.1	SPAC12G12.16c
SPAC12G12.16c(3)	3	2937.5	22	SPAC12G12.16c
SPAC12G12.16c(3)	4	21.9962	0.165	SPAC12G12.16c
SPAC12G12.16c(3)	6	4.15085	0.0311	SPAC12G12.16c
SPAC12G12.16c(3)	7	5.97175	0.0447	SPAC12G12.16c
SPAC12G12.16c(3)	9	2.05607	0.0154	SPAC12G12.16c
SPAC12G12.16c(3)	10	1.49794	0.0112	SPAC12G12.16c
SPAC12G12.16c(3)	20	0.182322	0.00136	SPAC12G12.16c
SPAC12G12.16c(3)	18	0.182322	0.00136	SPAC12G12.16c
SPAC12G12.16c(3)	12	0.240547	0.000303	SPAC12G12.16c
SPAC12G12.16c(3)	14	0.171476	0.00128	SPAC12G12.16c
SPAC12G12.16c(3)	15	0.171476	0.00128	SPAC12G12.16c
SPAC12G12.16c(3)	27	0	0	SPAC12G12.16c
SPAC23C4.09c(1)	24	0	0	SPAC23C4.09c
SPAC23C4.09c(1)	0	32999.2	100	SPAC23C4.09c
SPAC23C4.09c(1)	2	7214.32	21.9	SPAC23C4.09c
SPAC23C4.09c(1)	3	161.281	0.489	SPAC23C4.09c
SPAC23C4.09c(1)	5	7.50553	0.0227	SPAC23C4.09c
SPAC23C4.09c(1)	6	6.49684	0.0197	SPAC23C4.09c
SPAC23C4.09c(1)	8	2.66223	0.00807	SPAC23C4.09c
SPAC23C4.09c(1)	9	1.30731	0.00396	SPAC23C4.09c
SPAC23C4.09c(1)	20	0	0	SPAC23C4.09c
SPAC23C4.09c(1)	21	0.182322	5.53e-05	SPAC23C4.09c
SPAC23C4.09c(1)	11	1.49794	0.00454	SPAC23C4.09c
SPAC23C4.09c(1)	13	2.2539	0.00683	SPAC23C4.09c
SPAC23C4.09c(1)	14	1.86191	0.00564	SPAC23C4.09c
SPAC23C4.09c(1)	26	0.182322	0.000553	SPAC23C4.09c
SPAC23C4.09c(2)	24	0.635288	0.00638	SPAC23C4.09c
SPAC23C4.09c(2)	0	9953.12	100	SPAC23C4.09c
SPAC23C4.09c(2)	2	472.86	4.75	SPAC23C4.09c
SPAC23C4.09c(2)	3	167.967	1.69	SPAC23C4.09c
SPAC23C4.09c(2)	5	2.05607	0.0207	SPAC23C4.09c
SPAC23C4.09c(2)	6	9.20019	0.0924	SPAC23C4.09c
SPAC23C4.09c(2)	8	5.60383	0.0563	SPAC23C4.09c
SPAC23C4.09c(2)	9	9.23715	0.0928	SPAC23C4.09c
SPAC23C4.09c(2)	19	1.87067	0.0188	SPAC23C4.09c
SPAC23C4.09c(2)	21	0.635288	0.00638	SPAC23C4.09c
SPAC23C4.09c(2)	17	3.01308	0.0303	SPAC23C4.09c
SPAC23C4.09c(2)	11	13.9252	0.14	SPAC23C4.09c
SPAC23C4.09c(2)	13	3.07708	0.0309	SPAC23C4.09c
SPAC23C4.09c(2)	14	1.93434	0.0194	SPAC23C4.09c
SPAC23C4.09c(2)	26	0	0	SPAC23C4.09c
SPAC23C4.09c(3)	25	0	0	SPAC23C4.09c
SPAC23C4.09c(3)	0	9246.78	100	SPAC23C4.09c
SPAC23C4.09c(3)	1	4334.49	46.9	SPAC23C4.09c
SPAC23C4.09c(3)	3	3921.09	42.4	SPAC23C4.09c
SPAC23C4.09c(3)	4	15.5503	0.168	SPAC23C4.09c
SPAC23C4.09c(3)	6	7.31252	0.0791	SPAC23C4.09c
SPAC23C4.09c(3)	7	8.85221	0.0957	SPAC23C4.09c
SPAC23C4.09c(3)	9	7.06118	0.0764	SPAC23C4.09c
SPAC23C4.09c(3)	10	12.0948	0.131	SPAC23C4.09c
SPAC23C4.09c(3)	20	0.587416	0.00635	SPAC23C4.09c
SPAC23C4.09c(3)	18	0.979626	0.0106	SPAC23C4.09c
SPAC23C4.09c(3)	12	4.42264	0.0478	SPAC23C4.09c
SPAC23C4.09c(3)	14	2.71446	0.0294	SPAC23C4.09c
SPAC23C4.09c(3)	15	2.66223	0.0288	SPAC23C4.09c
SPCC4B3.06c(1)	24	0	0	SPCC4B3.06c
SPCC4B3.06c(1)	0	32999.2	100	SPCC4B3.06c
SPCC4B3.06c(1)	2	1798.23	5.45	SPCC4B3.06c
SPCC4B3.06c(1)	3	67.5582	0.205	SPCC4B3.06c
SPCC4B3.06c(1)	5	4.78864	0.0145	SPCC4B3.06c
SPCC4B3.06c(1)	6	5.97175	0.0181	SPCC4B3.06c
SPCC4B3.06c(1)	8	7.08781	0.0215	SPCC4B3.06c
SPCC4B3.06c(1)	9	3.32862	0.0101	SPCC4B3.06c
SPCC4B3.06c(1)	20	0	0	SPCC4B3.06c
SPCC4B3.06c(1)	21	0	0	SPCC4B3.06c
SPCC4B3.06c(1)	11	1.30731	0.00396	SPCC4B3.06c
SPCC4B3.06c(1)	13	0.635288	0.00193	SPCC4B3.06c
SPCC4B3.06c(1)	14	0.635288	0.00193	SPCC4B3.06c
SPCC4B3.06c(1)	26	0.166724	5.05e-05	SPCC4B3.06c
SPCC4B3.06c(3)	25	0	0	SPCC4B3.06c
SPCC4B3.06c(3)	0	16682	100	SPCC4B3.06c
SPCC4B3.06c(3)	1	6679.88	40	SPCC4B3.06c
SPCC4B3.06c(3)	3	22903.2	137	SPCC4B3.06c
SPCC4B3.06c(3)	4	22.5173	0.135	SPCC4B3.06c
SPCC4B3.06c(3)	6	4.94915	0.0297	SPCC4B3.06c
SPCC4B3.06c(3)	7	3.65161	0.0219	SPCC4B3.06c
SPCC4B3.06c(3)	9	4.03133	0.0242	SPCC4B3.06c
SPCC4B3.06c(3)	10	1.30731	0.00784	SPCC4B3.06c
SPCC4B3.06c(3)	20	0.377469	0.00226	SPCC4B3.06c
SPCC4B3.06c(3)	18	0.182322	0.00109	SPCC4B3.06c
SPCC4B3.06c(3)	12	0.693149	0.00416	SPCC4B3.06c
SPCC4B3.06c(3)	14	0.171476	0.000103	SPCC4B3.06c
SPCC4B3.06c(3)	15	0.163529	0.0001381	SPCC4B3.06c
SPCC4B3.06c(3)	27	0	0	SPCC4B3.06c
ubc14(1)	25	0	0	ubc14
ubc14(1)	0	5534.51	100	ubc14
ubc14(1)	1	35008.7	633	ubc14
ubc14(1)	3	810.489	14.6	ubc14
ubc14(1)	4	161.281	2.91	ubc14
ubc14(1)	6	2.43524	0.044	ubc14
ubc14(1)	7	1.30731	0.0236	ubc14
ubc14(1)	9	0.635288	0.0115	ubc14
ubc14(1)	10	0.377469	0.00682	ubc14
ubc14(1)	20	0.182323	0.00329	ubc14
ubc14(1)	22	0	0	ubc14
ubc14(1)	18	0.182322	0.00329	ubc14
ubc14(1)	12	0.140547	0.000733	ubc14
ubc14(1)	14	0	0	ubc14
ubc14(1)	15	0.105466	7.33e-05	ubc14
ubc14(1)	27	0	0	ubc14
ubc14(2)	25	0	0	ubc14
ubc14(2)	0	2017.55	100	ubc14
ubc14(2)	1	558.571	27.7	ubc14
ubc14(2)	3	108.873	5.4	ubc14
ubc14(2)	4	17.7045	0.878	ubc14
ubc14(2)	6	7.50553	0.372	ubc14
ubc14(2)	7	3.07708	0.153	ubc14
ubc14(2)	9	0.137747	0.000187	ubc14
ubc14(2)	10	0.185734	0.000425	ubc14
ubc14(2)	20	0.114055	0.000201	ubc14
ubc14(2)	22	0	0	ubc14
ubc14(2)	18	0.182322	0.000904	ubc14
ubc14(2)	12	0.377469	0.000187	ubc14
ubc14(2)	14	0.182322	0.000904	ubc14
ubc14(2)	15	0.236691	0.00182	ubc14
ubc14(2)	27	0.222324	0.00011	ubc14
ubc14(3)	25	0	0	ubc14
ubc14(3)	0	51395.5	100	ubc14
ubc14(3)	1	41309	80.4	ubc14
ubc14(3)	3	1010.72	1.97	ubc14
ubc14(3)	4	29.1673	0.0568	ubc14
ubc14(3)	6	2.76936	0.00539	ubc14
ubc14(3)	7	0.55772	0.00109	ubc14
ubc14(3)	9	0.570103	0.00111	ubc14
ubc14(3)	10	0.137747	7.34e-05	ubc14
ubc14(3)	20	0	0	ubc14
ubc14(3)	18	0.171476	0.000334	ubc14
ubc14(3)	12	0.405466	0.000789	ubc14
ubc14(3)	14	0.182322	0.000355	ubc14
ubc14(3)	15	0.171476	0.000334	ubc14
ubc14(3)	27	0	0	ubc14
wt(1)	25	0.182322	0.00142	wt
wt(1)	0	12799.6	100	wt
wt(1)	1	2439.72	19.1	wt
wt(1)	3	1010.72	7.9	wt
wt(1)	4	1005.27	7.85	wt
wt(1)	6	27.139	0.212	wt
wt(1)	7	24.0115	0.188	wt
wt(1)	9	8.00357	0.0625	wt
wt(1)	10	1.62611	0.0127	wt
wt(1)	20	0	0	wt
wt(1)	22	0	0	wt
wt(1)	18	0	0	wt
wt(1)	12	3.97895	0.0311	wt
wt(1)	14	0.854208	0.00667	wt
wt(1)	15	0.635288	0.00496	wt
wt(1)	27	0.16823	0.000131	wt
wt(3)	24	0	0	wt
wt(3)	0	7914.35	100	wt
wt(3)	2	2668.73	33.7	wt
wt(3)	3	249.52	3.15	wt
wt(3)	5	24.0115	0.303	wt
wt(3)	6	11.0391	0.139	wt
wt(3)	8	12.4532	0.157	wt
wt(3)	9	5.00182	0.0632	wt
wt(3)	19	0.182322	0.000923	wt
wt(3)	17	0.169458	0.000467	wt
wt(3)	11	0.635288	0.00803	wt
wt(3)	14	0.240547	0.000512	wt

## Sheet: maximum.lifespan
maximum lifespan (days)	samples	Mutants
18	alg14(1)	alg14
15	alg14(2)	alg14
10	alg14(3)	alg14
15	gut2(1)	gut2
18	gut2(2)	gut2
18	gut2(3)	gut2
19	htr11(1)	htr11
15	htr11(2)	htr11
15	htr11(3)	htr11
18	htr12(1)	htr12
14	htr12(2)	htr12
18	htr12(3)	htr12
12	mgl1(1)	mgl1
20	mgl1(2)	mgl1
14	mgl1(3)	mgl1
22	pac3(1)	pac3
27	pac3(2)	pac3
25	pac3(3)	pac3
20	SPAC12G12.16c(1)	SPAC12G12.16c
20	SPAC12G12.16c(2)	SPAC12G12.16c
12	SPAC12G12.16c(3)	SPAC12G12.16c
20	SPAC23C4.09c(1)	SPAC23C4.09c
26	SPAC23C4.09c(2)	SPAC23C4.09c
25	SPAC23C4.09c(3)	SPAC23C4.09c
20	SPCC4B3.06c(1)	SPCC4B3.06c
14	SPCC4B3.06c(3)	SPCC4B3.06c
12	ubc14(1)	ubc14
9	ubc14(2)	ubc14
10	ubc14(3)	ubc14
18	wt(1)	wt
14	wt(3)	wt
