# Supplementary material for: Broad functional profiling of fission yeast proteins using phenomics and machine learning
Source: eLife. 2023 Oct 3;12:RP88229. doi: 10.7554/eLife.88229 (PMC10547477; doi:10.7554/eLife.88229)
Supplement: Supplementary file 1. [file elife-88229-supp1.xlsx]

## Sheet: Description of data
Supplementary file 1: Data for phenomics assays
Sheet	Description
Key to conditions	Details for all conditions used for phenotyping
Standard conditions	Mutants displaying altered growth in standard conditions
Fitness standard conditions	Corrected colony-size data of all mutants for standard conditions
Fitness all conditions	Corrected colony-size data of all mutants for all conditions
Discretized all conditions	Mutants displaying increased growth (resistant: 1), decreased growth (sensitive: -1), or unchanged growth (0) phenotypes in all stress, nutrient and drug conditions tested
Hits per mutant	Numbers of resistant and sensitive phenotypes associated with the different mutants
Hits per condition	Numbers of resistant and sensitive phenotypes associated with the different conditions
Oxidative stress	Mutants that are resistant or sensitive to different oxidative-stress conditions
Data for clustering	Filtered and discretized data used for k-medoids clustering (Fig. 3A)
K-medoids clusters	Gene lists for the 8 k-medoids clusters (Fig. 3A)
GO enrichments	GO enrichments for the clusters (Fig. 3A)
GO slims	GO slim enrichments for the clusters (Fig. 3A)
KEGG	KEGG enrichments for the clusters (Fig. 3A)

## Sheet: Key to conditions
Abbreviation	Media	Type	Is_combination	Dose	Description	Unit
YES_32	YES	Control	FALSE	32	temperature	celsius
EMM_32	EMM	Control	FALSE	32	temperature	celsius
EMM_3AT	EMM	Nutrients	FALSE	10	3-Amino-1,2,4-triazole	mM
EMM_A_150ugml	EMM	Drugs	FALSE	150	amorolfine HCl	µg/ml
EMM_C_2ugml	EMM	Drugs	FALSE	2	ciclopirox olamine	µg/ml
EMM_DIP	EMM	Chelating_Agent	FALSE	50	2,2’-dipyridyl	µM
EMM_Glutamate	EMM	Nutrients	FALSE	20	glutamate as nitrogen source	mM
EMM_l_2ugml	EMM	Drugs	FALSE	2	itraconazole	µg/ml
EMM_lysine	EMM	Nutrients	FALSE	20	Lysine as nitrogen source	mM
EMM_lysine_day2	EMM	Nutrients	FALSE	20	Lysine as nitrogen source, for 2 days	mM
EMM_proline	EMM	Nutrients	FALSE	20	Proline as nitrogen source	mM
EMM_proline_day2	EMM	Nutrients	FALSE	20	Proline as nitrogen source, for 2 days	mM
EMM_proline_lysine	EMM	Nutrients	FALSE	20	Proline+ Lysine as nitrogen source	mM
EMM_proline_lysine_day2	EMM	Nutrients	FALSE	20	Proline+ Lysine as nitrogen source, for 2 days	mM
EMM_serine	EMM	Nutrients	FALSE	20	Serine as nitrogen source	mM
EMM_serine_day2	EMM	Nutrients	FALSE	20	Serine as nitrogen source, for 2 days	mM
EMM_serine_lysine	EMM	Nutrients	FALSE	20	Serine + Lysine as nitrogen source	mM
EMM_serine_lysine_day2	EMM	Nutrients	FALSE	20	Serine + Lysine as nitrogen source, for 2 days	mM
EMM_T_3ugml	EMM	Drugs	FALSE	3	terbinafine HCl	µg/ml
YES_100g	YES	DNA_damage	FALSE	100	X ray	R
YES_18	YES	Temperature	FALSE	18	temperature	celsius
YES_25	YES	Temperature	FALSE	25	temperature	celsius
YES_32_1week	YES	Temperature	FALSE	32	1 week incubation	celsius
YES_32_pre-rapa	YES	TOR-signalling	FALSE	100	rapamycin 2 pinnings	ng/ml
YES_37	YES	Temperature	FALSE	37	temperature	celsius
YES_benzamidine_0.5mM	YES	protein_stress_damage_synthesis	FALSE	0.5	Benzamidine	mM
YES_benzamidine_10mM	YES	protein_stress_damage_synthesis	FALSE	10	Benzamidine	mM
YES_Bleomycin_600ugml	YES	DNA_damage	FALSE	600	Bleomycin	µg/ml
YES_bortezomib_125uM	YES	protein_stress_damage_synthesis	FALSE	125	Bortezomib	µM
YES_BrefeldinA_80uM	YES	protein_stress_damage_synthesis	FALSE	80	Brefeldin A	µM
YES_caffeine_10mM	YES	Drugs	FALSE	10	Caffeine	mM
YES_calcofluor_2ugml	YES	Cell wall_membrane_integrity_Stress	FALSE	2	Calcofluor	µg/ml
YES_calcofluor_2ugml_SDS_0.04percent	YES	Cell wall_membrane_integrity_Stress	TRUE	2, 0.04	Calcofluor and SDS (Sodium dodecyl sulfate)	µg/ml, % v/v
YES_CdCl2_0.5mM	YES	Heavy _metals	FALSE	0.5	Cadmium Chloride	mM
YES_CoCl_0.45mM	YES	Heavy _metals	FALSE	0.45	Cobalt cloride	mM
YES_cycloheximide_0.01ugml	YES	protein_stress_damage_synthesis	FALSE	0.01	Cycloheximide	µg/ml
YES_cycloheximide_0.025ugml	YES	protein_stress_damage_synthesis	FALSE	0.025	Cycloheximide	µg/ml
YES_cycloheximide_0.025ugml_day2	YES	protein_stress_damage_synthesis	FALSE	0.05	Cycloheximide 2 days incubation	µg/ml
YES_cycloheximide_0.05ugml	YES	protein_stress_damage_synthesis	FALSE	0.05	Cycloheximide	µg/ml
YES_cycloheximide_0.05ugml_day2	YES	protein_stress_damage_synthesis	FALSE	0.05	Cycloheximide 2 days incubation	µg/ml
YES_Diamide_2mM	YES	Oxidative_stress	FALSE	2	Diamide	mM
YES_Diamide_3mM	YES	Oxidative_stress	FALSE	3	Diamide	mM
YES_EDTA_0.1mM	YES	Chelating_Agent	FALSE	0.1	Ethylenediaminetetraacetic acid	mM
YES_EDTA_0.3mM	YES	Chelating_Agent	FALSE	0.3	Ethylenediaminetetraacetic acid	mM
YES_EGTA_10mM	YES	Chelating_Agent	FALSE	10	Egtazic acid	mM
YES_EGTA_10mM_5days	YES	Chelating_Agent	TRUE	10	Egtazic acid 5 days incubation	mM
YES_EGTA_10mM_day2	YES	Chelating_Agent	TRUE	10	Egtazic acid 2 days incubation	mM
YES_EGTA_1mM	YES	Chelating_Agent	FALSE	1	Egtazic acid	mM
YES_EGTA_5mM	YES	Chelating_Agent	FALSE	5	Egtazic acid	mM
YES_ethanol_10percent	YES	Drugs	FALSE	10	Ethanol	% v/v
YES_ethanol_10percent_day2	YES	Drugs	FALSE	10	Ethanol 2 days incubation	% v/v
YES_ethanol_1percent_no_glucose	YES	Nutrients	FALSE	1	Ethanol as carbon source	% v/v
YES_ethanol_5percent	YES	Drugs	FALSE	5	Ethanol	% v/v
YES_formamide_2.5percent	YES	Nucleic_acid_metabolism	FALSE	2.5	Formamide	% v/v
YES_fructose_2percent	YES	Nutrients	FALSE	2	fructose as carbon source	% (w/v)
YES_galactose_2percent_glucose_0.1percent	YES	Nutrients	FALSE	2	galactose with 0.1% starter glucose	% (w/v)
YES_galactose_2percent_glucose_0.1percent_day2	YES	Nutrients	FALSE	2	galactose with 0.1% starter glucose, 2 days incubation	% (w/v)
YES_glucose_0.1percent	YES	Nutrients	FALSE	0.1	low glucose	% (w/v)
YES_glucose_0.1percent_25C	YES	Nutrients	TRUE	0.1, 25	low glucose different temperature	% (w/v), celsius
YES_glucose_0.1percent_25C_10days	YES	Nutrients	TRUE	0.1, 25	low glucose different temperature, 10 day incubaation	% (w/v), celsius
YES_glucose_0.1percent_25C_1week	YES	Nutrients	TRUE	0.1, 25	low glucose different temperature, 7 day incubaation	% (w/v), celsius
YES_glucose_0.1percent_32C	YES	Nutrients	TRUE	0.1	low glucose	% (w/v)
YES_glucose_0.1percent_32C_10days	YES	Nutrients	TRUE	0.1	low glucose 10 days incubation	% (w/v)
YES_glucose_0.1percent_32C_day2	YES	Nutrients	TRUE	0.1	low glucose 2 days incubation	% (w/v)
YES_glucose_0.5percent_25C	YES	Nutrients	TRUE	0.5, 25	low glucose different temperature	% (w/v), celsius
YES_glucose_0.5percent_25C_10days	YES	Nutrients	TRUE	0.5, 25	low glucose different temperature, 10 days incubation	% (w/v), celsius
YES_glucose_0.5percent_25C_1week	YES	Nutrients	TRUE	0.5, 25	low glucose different temperature, 7 days incubation	% (w/v), celsius
YES_glucose_0.5percent_32C	YES	Nutrients	TRUE	0.5	low glucose	% (w/v)
YES_glucose_0.5percent_32C_10days	YES	Nutrients	TRUE	0.5	low glucose 10 days incubation	% (w/v)
YES_glucose_1percent_25C	YES	Nutrients	TRUE	1, 25	low glucose different temperature	% (w/v), celsius
YES_glucose_1percent_25C_10days	YES	Nutrients	TRUE	1, 25	low glucose different temperature, 10 day incubation	% (w/v), celsius
YES_glucose_1percent_25C_1week	YES	Nutrients	TRUE	1, 25	low glucose different temperature, 7 day incubation	% (w/v), celsius
YES_glucose_1percent_32C	YES	Nutrients	TRUE	1	glucose	% (w/v)
YES_glucose_1percent_32C_10days	YES	Nutrients	TRUE	1	glucose	% (w/v)
YES_glucose_3percent_25C_10days	YES	Nutrients	TRUE	25	temperature	celsius
YES_glucose_3percent_25C_1week	YES	Nutrients	TRUE	25	temperature, 7 days incubation	celsius
YES_glucose_3percent_32C_10days	YES	Nutrients	TRUE	25	temperature, 10 days incubation	celsius
YES_glycerol	YES	Nutrients	FALSE	2	2% Glycerol as carbon source with 0.1% starter glucose	% (w/v)
YES_glycerol_day2	YES	Nutrients	FALSE	2	2% Glycerol as carbon source with 0.1% starter glucose	% (w/v)
YES_glycerol_galactose_2percent_glucose_0.1percent	YES	Nutrients	TRUE	2	2% Glycerol+ 2% Galactose as carbon source with 0.1% starter glucose	% (w/v)
YES_glycerol_MMS_0.0075percent	YES	DNA_damage	TRUE	2, 0.0075	2% Glycerol as carbon source with 0.1% starter glucose and 0.0075 %Methyl methanesulfonate	% (w/v)
YES_H2O2_0.5mM	YES	Oxidative_stress	FALSE	0.5	Hydrogen peroxide	mM
YES_H2O2_1mM	YES	Oxidative_stress	FALSE	1	Hydrogen peroxide	mM
YES_HU_10mM	YES	Nucleic_acid_metabolism	FALSE	10	Hydroxyurea	mM
YES_HU_40mM	YES	Nucleic_acid_metabolism	FALSE	40	Hydroxyurea	mM
YES_KCl_0.5M	YES	Osmotic_Stress	FALSE	0.5	Potasium Chloride	M
YES_KCl_0.5M_MMS_0.0075percent	YES	DNA_damage	TRUE	0.5, 0.0075	0.5 M Potasium chloride, 0.0075 % MMS	M,% (v/v)
YES_KCl_0.5M_SDS_0.04percent	YES	Osmotic_Stress	TRUE	0.5, 0.04	0.5 M Potasium chloride, 0.04% SDS	M,% (v/v)
YES_KCl_1M	YES	Osmotic_Stress	FALSE	1	Potasium Chloride	M
YES_KCl_1M_SDS_0.04percent	YES	Osmotic_Stress	TRUE	1, 0.04	1 M Potasium chloride, 0.04% SDS	M,% (v/v)
YES_LiCl_2mM	YES	Osmotic_Stress	FALSE	2	Lithium Chloride	mM
YES_LiCl_2mM_SDS_0.04percent	YES	Osmotic_Stress	TRUE	2, 0.04	2mM Lithium Chloride, 0.04% SDS	mM,% (v/v)
YES_LiCl_4mM	YES	Osmotic_Stress	FALSE	4	Lithium Chloride	mM
YES_LiCl_4mM_MMS_0.0075	YES	DNA_damage	TRUE	4, 0.0075	4 mM Lithium Chloride, 0.0075 % MMS	mM,% (v/v)
YES_LiCl_4mM_SDS_0.04percent	YES	Osmotic_Stress	TRUE	4, 0.04	4 mM Lithium Chloride, 0.04% SDS	mM,% (v/v)
YES_LiCl_7.5mM	YES	Osmotic_Stress	FALSE	7.5	Lithium Chloride	mM
YES_LiCl_7.5mM_SDS_0.04percent	YES	Osmotic_Stress	TRUE	7.5, 0.04	7.5 mM Lithium Chloride, 0.04% SDS	mM,% (v/v)
YES_maltose_2percent	YES	Nutrients	FALSE	2	Maltose as carbon source	% (w/v)
YES_mannitol_2percent_glucose_0.1percent	YES	Nutrients	FALSE	2, 0.1	Manitol as carbon source with 0.1% glucose as starter	% (w/v)
YES_MgCl2_100mM	YES	Osmotic_Stress	FALSE	100	Magnesium Chloride	mM
YES_MgCl2_100mM_SDS_0.04percent	YES	Osmotic_Stress	TRUE	100, 0.04	100 mM Magnesium Chloride, 0.04% SDS	mM,% (v/v)
YES_MgCl2_100mM_SDS_0.04percent_day2	YES	Osmotic_Stress	TRUE	100, 0.04	100 mM Magnesium Chloride, 0.04% SDS 2 days incubation	mM,% (v/v)
YES_MgCl2_200mM_SDS_0.04percent	YES	Osmotic_Stress	TRUE	200, 0.04	200 mM Magnesium Chloride, 0.04% SDS	mM,% (v/v)
YES_MMS_0.005percent	YES	DNA_damage	FALSE	0.005	Methyl methanesulfonate	% (v/v)
YES_MMS_0.0075percent	YES	DNA_damage	FALSE	0.0075	Methyl methanesulfonate	% (v/v)
YES_NaCl_100mM	YES	Osmotic_Stress	FALSE	100	Sodium Chloride	mM
YES_NaCl_100mM_MMS_0.0075percent	YES	DNA_damage	TRUE	100, 0.0075	100 mM Sodium Chloride, 0.0075% MMS	mM,% (v/v)
YES_NaCl_100mM_SDS_0.04percent	YES	DNA_damage	TRUE	100, 0.04	100 mM Sodium Chloride, 0.04% SDS	mM,% (v/v)
YES_NaCl_200mM	YES	Osmotic_Stress	FALSE	200	Sodium Chloride	mM
YES_NaOrthovanadate_0.5mM	YES	Drugs	FALSE	0.5	Sodium Orthovanadate	mM
YES_NaOrthovanadate_1mM	YES	Drugs	FALSE	1	Sodium Orthovanadate	mM
YES_pre-rapa_rapa_100g	YES	TOR-signalling	TRUE	100100	100 ng/ml rapamycin (2 pinning) +100 R (X-ray)	ng/ml, R
YES_rapa	YES	TOR-signalling	FALSE	100	Rapamycin	ng/ml
YES_rapa_100g	YES	TOR-signalling	TRUE	100	100 ng/ml rapamycin +100 R (X-ray)	ng/ml, R
YES_SDS_0.01percent	YES	Cell wall_membrane_integrity_Stress	FALSE	0.01	Sodium dodecyl sulfate	% (v/v)
YES_SDS_0.02percent	YES	Cell wall_membrane_integrity_Stress	FALSE	0.02	Sodium dodecyl sulfate	% (v/v)
YES_SDS_0.04percent	YES	Cell wall_membrane_integrity_Stress	FALSE	0.04	Sodium dodecyl sulfate	% (v/v)
YES_sucrose_2percent	YES	Nutrients	FALSE	2	Sucrose as carbon source	% (w/v)
YES_TBH_1mM	YES	Oxidative_stress	FALSE	1	Tert-Butyl hydroperoxide	mM
YES_TBH_1mM_day2	YES	Oxidative_stress	FALSE	1	Tert-Butyl hydroperoxide 2 days incubation	mM
YES_tea_tree_0.25ulml	YES	Drugs	FALSE	0.25	Tea tree oil	µl/ml
YES_tea_tree_0.5ulml	YES	Drugs	FALSE	0.5	Tea tree oil	µl/ml
YES_torin1_5uM	YES	TOR-signalling	FALSE	5	Torin 1	nM
YES_TSA_500nM	YES	HDAC_inhibitors	FALSE	500	Trichostatin A	nM
YES_tunicamycin_1ulin100ml	YES	protein_stress_damage_synthesis	FALSE	20	Tunicamycin	fg/ml
YES_tunicamycin_2ulin100ml	YES	protein_stress_damage_synthesis	FALSE	40	Tunicamycin	fg/ml
YES_VPA_5mM	YES	HDAC_inhibitors	FALSE	5	Valproic Acid	mM
YES_VPA_8mM	YES	HDAC_inhibitors	FALSE	8	Valproic Acid	mM
YES_Xilose_1_week	YES	Nutrients	FALSE	2, 0.1	Xilose as carbon source 0.1% starter glucose 7 days incubation	% (w/v)
YES_Xilose_2percent_glucose_0.1percent	YES	Nutrients	FALSE	2, 0.1	Xilose as carbon source 0.1% starter glucose	% (w/v)
YES_Xilose_2percent_glucose_0.1percent_day2	YES	Nutrients	FALSE	2, 0.1	Xilose as carbon source 0.1% starter glucose 10 days incubation	% (w/v)

## Sheet: Standard conditions
FAST_YES	FAST_EMM	SLOW_YES	SLOW_EMM
SPAPB2B4.06	SPBC1198.14c	SPBC1539.10	SPBC947.11c
SPBC29A10.12	SPBC29A3.12	SPBC15D4.10c	SPAC824.09c
SPBPB8B6.04c	SPBC216.01c	SPBP8B7.18c	SPCC4E9.02
SPBP4H10.16c	SPAC4G8.03c	SPBC902.02c	SPCP1E11.09c
SPBC23G7.12c	SPAC57A10.07	SPCC18B5.07c	SPBC106.10
SPBC32H8.02c	SPCC1281.07c	SPBP8B7.10c	SPBC1105.14
SPAC2F3.15	SPCC4E9.01c	SPBC29B5.01	SPBC651.11c
SPAC1687.15	SPBC16H5.12c	SPAC3G9.08	SPAC926.03
SPBC1198.14c	SPAC29B12.06c	SPBC106.10	SPAC30D11.12
SPAC12G12.01c	SPAC1556.04c	SPAC1142.08	SPBC29A3.01
SPAC821.07c	SPAC18B11.04	SPAC14C4.16	SPCC895.06
SPBPB8B6.05c	SPCC191.10	SPAC57A10.14	SPAC25B8.19c
SPCC1393.09c	SPAC23H4.08	SPAC821.09	SPCC18.13
SPAC11D3.07c	SPAC16C9.06c	SPAC6G9.09c	SPCC13B11.01
SPAC11D3.09	SPAC15A10.11	SPBC11G11.03	SPBC1271.15c
SPAC12G12.07c	SPAC1705.02	SPBC1703.14c	SPAC10F6.01c
SPAC17G8.09	SPBC2F12.03c	SPBC16E9.12c	SPAC1A6.05c
SPCC70.06	SPAC13G7.03	SPBC21B10.03c	SPBC776.15c
SPAC17A5.11	SPAC1F7.09c	SPBC543.03c	SPCPB16A4.07
SPAC19B12.07c	SPAC26A3.09c	SPBC25B2.04c	SPCC24B10.15
SPBPJ4664.02	SPAC1F3.06c	SPAC589.02c	SPAC821.11
SPCC1020.10	SPCC645.13	SPBC31F10.12	SPCC594.05c
SPAC3H1.06c		SPAC9G1.06c	SPCC16C4.12
SPCC11E10.08		SPBP8B7.06	SPBC839.19
SPAC12G12.12		SPCC74.05	SPBC6B1.12c
SPAC17C9.09c		SPCP1E11.05c	SPCC4G3.11
SPAC16.01		SPAP27G11.14c	SPBC17G9.02c
SPAC1834.03c		SPAC3H1.05	SPBC1A4.04
SPAC19B12.08		SPAC1527.02	SPAC607.02c
SPCC1183.10		SPAC2C4.05	SPBC1198.11c
SPBC24C6.09c		SPAC4G8.13c	SPBC6B1.09c
SPBC365.07c		SPAC1805.12c	SPBP8B7.05c
SPCC417.12		SPAPB17E12.03	SPAC30C2.06c
SPAC3H1.10		SPBC1711.05	SPAC15E1.04
SPAC14C4.15c		SPAPB1E7.11c	SPBC2D10.07c
SPAC11D3.17		SPAC8E11.02c	SPAC1F7.14c
SPAC139.04c		SPBC25D12.06	SPAC630.05
SPAC15A10.10		SPAC630.13c	SPAP27G11.05c
SPAC16C9.06c		SPBC26H8.03	SPBC106.01
SPAC19B12.10		SPBC3H7.03c	SPAC57A7.15c
SPBC1289.16c		SPBC9B6.07	SPCC330.21
SPBC17D1.07c		SPCC1919.10c	SPAC2F7.17
SPBC582.09		SPCC794.15	SPBC18H10.13
SPBC29B5.02c		SPCP1E11.06	SPBC1D7.03
SPCC16C4.06c		SPBC713.07c	SPAC1556.08c
SPAC3H1.13		SPAC1D4.06c	SPBC29A3.17
SPAC11D3.18c		SPAC2F7.08c	SPAC9E9.03
SPAC15A10.11		SPAC31G5.19	SPAC31A2.06
SPCC74.04		SPAC1805.14	SPAC4D7.08c
SPAC1705.02		SPAC23A1.11	SPBC14C8.16c
SPAC17G6.02c		SPBC1289.10c	SPBC1734.08
SPAC20H4.10		SPBC1734.11	SPCC74.03c
SPAC19E9.01c		SPAC6C3.08	SPAC16.03c
SPAC25H1.04		SPAC664.07c	SPAC458.05
SPBC2G2.05		SPBC17D1.06	SPAC637.10c
SPBC2F12.03c		SPBC19F8.08	SPCC306.11
SPBC800.11		SPBC649.03	SPAP27G11.06c
SPCC1223.13		SPAC637.11	SPAC31A2.15c
SPAC1B2.04		SPBC1604.09c	SPCC548.06c
SPBC21C3.08c		SPAPB1E7.06c	SPBC106.17c
SPBC4B4.10c		SPBC342.06c	SPCC794.09c
SPBC30D10.09c		SPBP8B7.25	SPCC645.14c
SPAC22G7.02		SPAC630.14c	SPCC4B3.20
SPCC1235.12c		SPCC1223.05c	SPAC6F6.12
SPCC1235.05c		SPAC1851.02	SPAC6B12.18
SPAC11E3.09		SPAC30D11.10	SPBC16A3.08c
SPAC1610.03c		SPAC1834.05	SPAC3A11.08
SPAC1782.05		SPAPB17E12.05	SPBC11G11.05
SPAC17G6.13		SPAC2F7.03c	SPBC839.04
SPAC32A11.03c		SPBC17A3.05c	SPCC1902.01
SPAC4H3.04c		SPAC1952.11c	SPCC4B3.10c
SPAC1687.13c		SPAC56E4.03	SPBC2A9.06c
SPAC13G7.03		SPAC6F12.09	SPBC19G7.01c
SPAC17G8.07		SPACUNK4.11c	SPAC6F12.06
SPAC683.03		SPBC405.04c	SPBP23A10.17
SPAC227.03c		SPBC21B10.13c	SPBP35G2.14
SPBC1347.03		SPBC32F12.02	SPBC1815.01
SPCC63.02c		SPBC215.04	SPAC6B12.19
SPAC11H11.04		SPBC4B4.04	SPBC8D2.17
SPCC24B10.03		SPBC4C3.12	SPAC806.03c
SPAC1F7.09c		SPBC4F6.06	SPBC646.09c
SPCC895.09c		SPBP22H7.08	SPAC4F10.14c
SPAC3F10.13		SPCC1223.15c	SPBC25H2.15
SPAC26A3.09c		SPAC22F8.04	SPBC2D10.09
SPAC227.10		SPAC27E2.03c	SPBC3H7.15
SPBC29A10.09c		SPAC20G4.04c	SPCC285.16c
SPAC10F6.06		SPCC4F11.03c	SPAC3C7.06c
SPCC737.04		SPAC3A12.12	SPBC1604.11
SPAC22A12.14c		SPCC1223.06	SPBC16D10.06
SPBC530.08		SPAC19G12.15c	SPBC23E6.09
SPCC1322.02		SPAC1952.02	SPAC1783.02c
SPAC13F5.04c		SPAC23C11.10	SPAC4C5.04
SPAC17A2.13c		SPAC1006.03c	SPCC1840.10
SPAC1420.03		SPAC1851.03	SPAC5D6.12
SPCC965.11c		SPAC1A6.01c	SPBC947.02
SPAC1F3.06c		SPAC19B12.11c	SPBC947.08c
SPAC3G6.09c		SPAPB17E12.08	SPBPJ4664.06
SPBC1683.03c		SPBC16H5.03c	SPCC364.03
SPCC1442.16c		SPAC824.02	SPBC1539.03c
SPCC188.09c		SPBC19G7.10c	SPCC777.13
SPAC17A5.04c		SPBC651.10	SPBC1921.07c
SPBC25B2.06c		SPBC16A3.07c	SPBC428.02c
SPAC14C4.05c		SPAPYUG7.03c	SPCC306.04c
SPCC645.13		SPBC4B4.07c	SPBC530.05
SPAC1687.06c		SPBC2D10.18	SPCC1919.05
SPAC17A2.14		SPBC800.04c	SPAC227.17c
SPAC4G9.06c		SPCC338.16	SPAC15A10.17
SPAC1805.02c		SPCP31B10.07	SPAC13G6.14
SPAC22F3.03c		SPAC22F8.11	SPAC959.04c
SPBC1778.09		SPAC25G10.03	SPBC19G7.07c
SPBC216.04c		SPAC3C7.04	SPAC4F10.05c
SPAC869.06c		SPAC3H5.07	SPBC27.02c
SPAC17G8.10c		SPAC16A10.05c	SPAC9.12c
SPBC16A3.13		SPAC13C5.07	SPCC553.03
SPAC521.05		SPCC4B3.15	SPAP7G5.04c
SPAC57A10.07		SPAC1783.05	SPBC119.08
SPCC777.02		SPBC13G1.08c	SPAC13G6.02c
SPCC1281.07c		SPAC644.14c	SPBC19C2.14
SPCC4E9.01c		SPAC6G10.12c	SPAC26A3.06
SPCP1E11.03		SPBC11C11.07	SPAC29A4.16
SPAC31A2.14		SPBC16C6.05	SPCC1223.11
SPBC16H5.12c		SPBC1105.04c	SPAC3H1.08c
SPAC25B8.13c		SPBC1706.01	SPAC1851.04c
SPAC869.01		SPBC2G2.14	SPBC25D12.05
SPAC732.02c		SPBC577.02	SPBC557.02c
SPBC354.12		SPCC1682.01	SPCC24B10.04
SPAC12B10.05		SPAC23D3.09	SPAC1039.11c
SPAC11D3.04c		SPAC222.08c	SPBC543.09
SPAC1399.03		SPAC2G11.12	SPAC1486.11
SPBC119.14		SPCC1753.02c	SPBP8B7.09c
SPAC4F10.17		SPCC553.01c	SPCC736.07c
SPCC550.07		SPAC3C7.12	SPCC1322.10
SPAC7D4.08		SPAC3H5.08c	SPAC4F10.18
SPCC1393.08		SPAC13A11.04c	SPBC30D10.16
SPAC56F8.16		SPAC19D5.11c	SPCC18B5.10c
SPAC29B12.06c		SPCC794.11c	SPCC417.07c
SPCC1442.13c		SPAC343.16	SPCC790.02
SPBC17D11.01		SPAC18G6.15	SPBC1604.04
SPAC30D11.06c		SPAC8C9.19	SPBC2F12.12c
SPAPB8E5.03		SPBC1604.02c	SPAC12B10.02c
SPBC20F10.10		SPBC1921.03c	SPBP8B7.11
SPAC22E12.06c		SPAC4G8.05	SPBC336.01
SPCC162.04c		SPBC12D12.06	SPAC4F10.15c
SPAC1002.01		SPAC2C4.15c	SPCC550.15c
SPAC6G9.16c		SPAC664.01c	SPBC27B12.10c
SPCC16A11.15c		SPBC1734.12c	SPBC19G7.17
SPAC8F11.10c		SPBC28F2.10c	SPBC56F2.01
SPAC3C7.07c		SPBC691.04	SPCC24B10.19c
SPBC776.16		SPAC6G10.02c	SPAC6F12.10c
SPAC19B12.12c		SPBC1105.05	SPAC11H11.01
SPAC11D3.13		SPBC1861.01c	SPAC57A7.04c
SPBC3B9.04		SPBC30D10.10c	SPAC144.06
SPAC17A2.10c		SPBC577.04	SPAC1783.08c
SPBC17G9.08c		SPBC83.17	SPAC26A3.04
SPAC1556.04c		SPBP8B7.22	SPAC343.15
SPAC6C3.03c		SPAC1071.08	SPAC6C3.04
SPAC823.16c		SPAC22G7.06c	SPCC576.11
SPAC1F7.12		SPAC328.10c	SPCC576.12c
SPBC106.03		SPAC890.05	SPAC31G5.04
SPBC887.06c		SPBC12C2.07c	SPAC13C5.01c
SPBC30D10.03c		SPAC3H5.12c	SPBC839.20
SPAC29A4.05		SPAC1F7.01c	SPAC2F7.04
SPAC31G5.17c		SPCC895.05	SPAC22G7.04
SPBC15D4.01c		SPAC1952.07	SPAC23A1.17
SPAC1B3.08		SPAPB18E9.01	SPBC215.02
SPAC27D7.12c		SPAC56F8.09	SPBC354.03
SPCC1742.01		SPBC15D4.15	SPBC21D10.11c
SPCC126.13c		SPAC664.02c	SPBC32F12.01c
SPACUNK4.07c		SPBC16H5.08c	SPBC3E7.01
SPCC13B11.04c		SPBC1734.13	SPCC330.14c
SPBC8E4.02c		SPBC215.05	SPBC2D10.13
SPBC119.03		SPBC428.08c	SPAC5D6.06c
SPAC12B10.03		SPBC6B1.06c	SPAC1F3.10c
SPCC622.15c		SPBC365.10	SPAC144.08
SPAC6G10.10c		SPBC4F6.12	SPCC1672.06c
SPAC1F7.06		SPBC32F12.08c	SPAC19G12.05
SPBC1271.06c		SPAC1071.11	SPBC725.12
SPAC2F7.06c		SPCC126.04c	SPCC1322.12c
SPBC8E4.05c		SPAC23H3.05c	SPAC24B11.09
SPBC1289.13c		SPAC30.02c	SPBC21B10.10
SPAC4G9.19		SPAC13G7.07	SPBC3D6.10
SPAC19A8.08		SPCC1259.03	SPCC1322.14c
SPAC18B11.04		SPAC13G6.10c	SPCC74.06
SPAC19A8.14		SPAC25G10.06	SPBC21D10.10
SPAC23H3.14		SPAC17H9.08	SPBC56F2.09c
SPBC29A10.11c		SPAC631.02	SPBC19C2.13c
SPAC23C4.07		SPAC8E11.07c	SPCC970.06
SPAC212.02		SPAC3C7.08c	SPAC8C9.17c
SPBC1709.11c		SPBC1604.08c	SPBC106.16
SPAC4F8.15		SPAC3G6.06c	SPCC1259.02c
SPBC1683.02		SPBC16H5.11c	SPAC22E12.19
SPAC22F8.09		SPAC7D4.12c	SPCC1682.12c
SPAC17A5.09c		SPAC8E11.05c	SPAC227.13c
SPAC22A12.16		SPAPB1A10.03	SPCC777.10c
SPCC1259.10		SPBC21D10.09c	SPCC1840.03
SPBC2G2.10c		SPBC9B6.11c	SPAC25H1.05
SPBPB2B2.14c		SPBC30B4.03c	SPAC4H3.13
SPAC3H1.04c		SPAC6G9.10c	SPAC1805.16c
SPCC191.10		SPBC36B7.08c	SPBC1703.07
SPAC57A10.06		SPBC215.08c	SPAC22G7.05
SPCC1753.05		SPBC31E1.02c	SPCC1442.03
SPBC776.05		SPBC887.04c	SPBC543.07
SPAPB2B4.04c		SPCC18.17c	SPBC19F8.06c
SPAC16C9.02c		SPAC3H8.07c	SPBC23E6.08
SPAC22H10.08		SPAC23H3.13c	SPAPB1A11.01
SPAC2F3.07c		SPAC27E2.01	SPBC16G5.15c
SPAC23C11.06c		SPBC106.19	SPBC26H8.08c
SPBC16C6.10		SPBC21C3.02c	SPAC17A5.08
SPAP8A3.12c		SPBC21H7.04	SPBC56F2.12
SPBCPT2R1.03		SPBC119.12	SPCC1739.03
SPBC646.02		SPBC30B4.06c	SPBC1A4.02c
SPAC20G4.05c		SPBC1539.06	SPBC409.10
SPBC1347.06c		SPBC336.03	SPCC4B3.17
SPBC29A3.12		SPBC146.13c	SPAC1006.09
SPBC36.01c		SPBC23G7.16	SPAC664.04c
SPAC17H9.03c		SPBC337.09	SPBC23G7.07c
SPBC2D10.19c		SPAC22H10.07	SPAC4H3.05
SPAC1834.04		SPAC1B3.03c	SPAC2C4.16c
SPBC2A9.11c		SPAC24B11.13	SPBC646.12c
SPAC1805.10		SPBC1604.07	SPBC776.06c
SPCC1393.02c		SPAC4A8.05c	SPAC644.08
SPBC19C2.06c		SPAC12B10.07	SPCC74.09
SPCC24B10.02c		SPAC1687.05	SPBC3B8.04c
SPCC4B3.08		SPAC6B12.15	SPAC3G9.03
SPBC26H8.11c		SPAC17H9.10c	SPAC1805.01c
SPBC1709.06		SPBC16A3.19	SPAC637.09
SPAC26A3.17c		SPAC23C11.04c	SPAC823.11
SPAC824.03c		SPBC1685.01	SPBC342.01c
SPBC216.01c		SPAC694.06c	SPBC83.02c
SPAC15E1.07c		SPBC1703.04	SPCC757.09c
SPAC13G7.09c		SPBC32F12.05c	SPCC794.07
SPBC1604.12		SPBC1539.08	SPAC144.04c
SPBC1711.01c		SPAC926.06c	SPAC4F10.11
SPBC21B10.12		SPBC336.14c	SPCC188.07
SPBC19C7.09c		SPBC24C6.05	SPAP7G5.05
SPBC21D10.07		SPBC337.16	SPCC777.09c
SPAC56E4.07		SPBC685.06	SPAC13C5.04
SPBC1652.01		SPCC188.13c	SPBC216.05
SPAC20G8.02		SPCC737.03c	SPBC1711.04
SPBC29A10.07		SPAC10F6.13c	SPCC1840.09
SPBC27B12.11c		SPCC4G3.15c	SPBC4B4.03
SPBC1685.08		SPAC23H3.03c	SPAC6G9.14
SPAC22F3.04		SPAC26F1.10c	SPBC2G2.13c
SPBC28E12.04		SPAC9G1.11c	SPAC3F10.04
SPBC3E7.10		SPAC25H1.07	SPAC11E3.11c
SPBC713.02c		SPCC970.10c	SPAC959.07
SPAC3H1.02c		SPAC18G6.02c	SPAC959.08
SPAC11D3.16c		SPAC26H5.05	SPCC1450.03
SPAC19G12.16c		SPAPB2B4.02	SPCC737.06c
SPAC4G8.03c		SPAC4H3.07c	SPAC14C4.06c
SPBC26H8.05c		SPBC13G1.10c	SPCC18B5.06
SPCC1020.03		SPAC30D11.09	SPAC644.07
SPAC227.11c		SPAC9G1.12	SPAC1952.03
SPBC8D2.18c		SPAC8C9.11	SPBC24C6.11
SPBC3B9.11c		SPBC16A3.03c	SPCC1739.07
SPBC17D11.02c		SPBC3B8.05	SPBC2G2.03c
SPAC23C4.09c		SPBC530.14c	SPAC13C5.02
SPAC29B12.13		SPBC29A3.05	SPBC3B9.13c
SPBC354.08c		SPAC222.04c	SPBC23G7.14
SPCC1020.13c		SPBC3B8.04c	SPCC790.03
SPCC1450.09c		SPAC3G9.03	SPBC776.11
SPBC3H7.07c		SPAC23G3.10c	SPAC26A3.07c
SPBC19G7.18c		SPAC637.09	SPCC1393.08
SPCC1183.04c		SPAC19G12.11	SPBC530.13
SPAC3H8.09c		SPAC1071.04c	SPCC24B10.09
		SPAC823.11	SPAP8A3.07c
		SPBC342.01c	SPCC553.04
		SPBC83.02c	SPAC144.03
		SPCC757.09c	SPAC17A5.02c
		SPAC4F10.11	SPAC30D11.05
		SPCC188.07	SPAC4F8.01
		SPAC3G9.07c	SPAC13G7.06
		SPAP7G5.05	SPCC1840.08c
		SPBC216.05	SPCPB16A4.04c
		SPBC29A10.16c	SPAC22F3.10c
		SPBC1711.04	SPBC428.04
		SPBC713.08	SPAC821.04c
		SPAC7D4.13c	SPBC11C11.02
		SPBC4B4.03	SPBC26H8.14c
		SPBC2G2.13c	SPBC83.10
		SPAC11E3.11c	SPCC1393.03
		SPAC959.07	SPBC19G7.02
		SPBP4H10.09	SPBC1A4.05
		SPAC959.08	SPAC13A11.01c
		SPBC1683.09c	SPAC3F10.17
		SPAC14C4.06c	SPCC1906.02c
		SPAC22F8.02c	SPCC1682.14
		SPCC18B5.06	SPAC17G8.11c
		SPAC13D6.02c	SPAC23D3.04c
		SPAC1952.03	SPAC4F8.03
		SPBC24C6.11	SPCC970.01
		SPCC1739.07	SPAC869.11
		SPBC2G2.03c	SPBC3B8.02
		SPAC13C5.02	SPBC11B10.10c
		SPBC3B9.13c	SPAC11E3.03
		SPCC790.03	SPBP35G2.04c
		SPBC776.11	SPBC1306.02
		SPBC336.13c	SPCC825.02
		SPBC577.15c	SPAC4F10.04
		SPCC550.12	SPCC18.06c
		SPCC24B10.09	SPBP8B7.13
		SPBC1921.01c	SPCC285.15c
		SPAP8A3.07c	SPCC970.05
		SPBC1921.06c	SPCC24B10.08c
		SPAC12G12.03	SPAC29A4.09
		SPCC553.04	SPAC14C4.09
		SPAC17A5.02c	SPBP35G2.07
		SPAC4F8.01	SPBC28E12.03
		SPAPB21F2.02	SPBC3D6.05
		SPAC25G10.09c	SPBC24C6.10c
		SPAC13G7.06	SPCC1739.06c
		SPAPJ698.02c	SPBC14F5.09c
		SPCPB16A4.04c	SPAC1952.05
		SPBC428.04	SPBC1718.03
		SPCC1672.04c	SPAC19G12.08
		SPBC3H7.09	SPBP4H10.05c
		SPBC11C11.02	SPAC4G9.16c
		SPCC895.07	SPAC17H9.13c
		SPBC83.10	SPAC1610.02c
		SPCC1393.03	SPBC1604.03c
		SPAC3F10.17	SPCC306.02c
		SPCC1906.02c	SPCC16C4.13c
		SPCC1682.14	SPAC3F10.09
		SPAC17G8.11c	SPCC16A11.07
		SPAC4G8.10	SPAC3H5.05c
		SPAC140.03	SPAC3A11.13
		SPAC869.11	SPBC428.06c
		SPAC823.12	SPAC24B11.10c
		SPBC11B10.10c	SPCC594.04c
		SPBP35G2.04c	SPBC12D12.07c
		SPCC126.08c	SPBC1105.02c
		SPCC825.02	SPAC1486.08
		SPAC4F10.04	SPAC16A10.03c
		SPCC18.06c	SPBC16H5.07c
		SPBP8B7.13	SPBC1711.06
		SPCC285.15c	SPCC550.11
		SPCC970.05	SPBC17G9.10
		SPBC839.03c	SPAC11G7.03
		SPCC24B10.08c	SPCC338.08
		SPAC14C4.09	SPBC13G1.12
		SPBP35G2.07	SPBC428.05c
		SPBC28E12.03	SPAC3G6.04
		SPBC24C6.10c	SPCC550.03c
		SPAC9E9.09c	SPAC1610.01
		SPCC1739.06c	SPBC6B1.04
		SPAC1952.05	SPBC2G2.07c
		SPCC306.09c	SPBC2D10.12
		SPAC4G8.11c	SPBC8D2.12c
		SPAC19G12.08	SPBC1734.06
		SPAC31A2.12	SPBC30D10.04
		SPBC26H8.12	SPAC1F5.07c
		SPBP4H10.05c	SPAC5D6.07c
		SPAC4G9.16c	SPAC16E8.01
		SPAC1610.02c	SPBC21C3.20c
		SPBC1604.03c	SPBC28F2.02
		SPCC16C4.13c	SPAC23H3.06
		SPBC1271.12	SPBC651.09c
		SPAC3F10.09	SPAC144.11
		SPCC16A11.07	SPAC1783.04c
		SPAC3H5.05c	SPBC902.06
		SPAC5D6.13	SPCC285.13c
		SPAC3A11.13	SPAC1556.01c
		SPAC17G8.05	SPAC31G5.03
		SPAC24B11.10c	SPAC17C9.14
		SPCC594.04c	SPBC18H10.11c
		SPBC3B8.10c	SPBC725.02
		SPBC16H5.07c	SPBC1289.11
		SPBC1711.06	SPCC16C4.10
		SPCC550.11	SPAC4C5.02c
		SPBC17G9.10	SPAC17G6.06
		SPAC11G7.03	SPBC83.03c
		SPCC338.08	SPBC839.05c
		SPBC13G1.12	SPCC584.11c
		SPBC428.05c	SPBC2G5.03
		SPAC323.01c	SPAC3C7.10
		SPAC3G6.04	SPBC19G7.08c
		SPCC550.03c	SPAC30C2.08
		SPBC2G2.07c	SPBC1711.13
		SPBC8D2.12c	SPBC725.04
		SPBC30D10.04	SPAC3H5.10
		SPAC1F5.07c	SPBC2G5.02c
		SPAC31A2.13c	SPBC887.15c
		SPAC16E8.01	SPAC57A10.09c
		SPBC21C3.20c	SPCC1494.08c
		SPAC18B11.11	SPBC31F10.14c
		SPBC16C6.03c	SPAC27E2.11c
		SPAC19E9.02	SPBC1105.01
		SPAC222.12c	SPCP1E11.11
		SPCC4F11.02	SPCC70.04c
		SPBC27B12.08	SPAC4D7.06c
		SPBC651.09c	SPAC1834.08
		SPAC144.11	SPBC1778.10c
		SPAC1783.04c	SPBC36.04
		SPAC589.10c	SPCC962.04
		SPBC31F10.10c	SPAC11G7.04
		SPBC902.06	SPAC1F5.08c
		SPCC14G10.04	SPAC1071.07c
		SPBC29A10.05	SPBC1604.20c
		SPAC22A12.07c	SPAC2G11.10c
		SPCC285.13c	SPCC63.06
		SPAC1556.01c	SPAC20H4.07
		SPCC663.11	SPCC11E10.06c
		SPAC31G5.03	SPBC2F12.04
		SPAC17C9.14	SPAC23C11.02c
		SPBC18H10.11c	SPBC21C3.17c
		SPBC725.02	SPBC30B4.08
		SPCC24B10.16c	SPBC16D10.01c
		SPBC16C6.09	SPBC947.15c
		SPBC839.13c	SPAC31G5.18c
		SPCC16C4.10	SPAC5D6.02c
		SPBC1289.01c	SPBC405.07
		SPCC1739.14	SPAPB1E7.12
		SPAC4C5.02c	SPAC22E12.04
		SPAC17G6.06	SPBC27.06c
		SPBC83.03c	SPAC644.06c
		SPBC839.05c	SPAC13F5.07c
		SPCC584.11c	SPBC18E5.10
		SPAC1F5.05c	SPCC1393.13
		SPBC2G5.03	SPCC4G3.04c
		SPCC16A11.10c	SPBC18E5.05c
		SPBC32F12.11	SPCC5E4.07
		SPAC1805.04	SPBC21H7.07c
		SPBC725.04	SPBC146.12
		SPAC644.15	SPCC1235.14
		SPAC3H5.10	SPBC29A10.13
		SPAC17C9.15c	SPBC1539.10
		SPBC902.03	SPBC15D4.10c
		SPAC19E9.03	SPBC365.06
		SPBC2G5.02c	SPBP8B7.18c
		SPBC887.15c	SPBC902.02c
		SPCC1494.08c	SPCC18B5.07c
		SPBC31F10.14c	SPBP8B7.10c
		SPAC27E2.11c	SPAC30D11.13
		SPAC22F3.13	SPCPB16A4.03c
		SPAC22F3.09c	SPAC3G9.08
		SPBC1105.01	SPAC1142.08
		SPCC191.07	SPAC14C4.16
		SPBC1778.06c	SPAC57A10.14
		SPCP1E11.11	SPAC821.09
		SPCC31H12.04c	SPAC6G9.09c
		SPAC1B1.04c	SPAC19B12.04
		SPAC9.02c	SPBC1703.14c
		SPAC1782.09c	SPBC16E9.12c
		SPAC4D7.06c	SPAC9G1.05
		SPBC1778.10c	SPBC3B9.09
		SPAC222.05c	SPBC21B10.03c
		SPBC36.04	SPBC543.03c
		SPCC338.10c	SPBC25B2.04c
		SPAC1782.07	SPAC589.02c
		SPCC962.04	SPBC31F10.12
		SPCC613.12c	SPBC18E5.14c
		SPAC6G9.12	SPCC74.05
		SPAC9E9.08	SPCP1E11.05c
		SPBC2G5.06c	SPAC22F3.08c
		SPCC364.06	SPAC14C4.12c
		SPCC736.04c	SPBPB7E8.01
		SPCC613.10	SPAP27G11.14c
		SPAC2G11.03c	SPAC1527.02
		SPAC11G7.04	SPCP1E11.10
		SPAC1071.07c	SPAC4G8.13c
		SPBC1604.20c	SPAC1805.12c
		SPAC2G11.10c	SPAC8F11.08c
		SPCC63.06	SPBC1271.14
		SPAC926.05c	SPAPB17E12.03
		SPAC20H4.07	SPBC1711.05
		SPAC4F10.19c	SPAC17H9.19c
		SPBC2F12.04	SPAC57A7.08
		SPAC23C11.02c	SPAPB1E7.11c
		SPBC30B4.08	SPAC8E11.02c
		SPAPB1A10.15	SPBC25D12.06
		SPCC553.12c	SPAC630.13c
		SPAC3A12.10	SPBC18H10.07
		SPAC31G5.18c	SPBC26H8.03
		SPBC725.09c	SPBC3H7.03c
		SPAC5D6.02c	SPBC9B6.07
		SPBC405.07	SPCP1E11.06
		SPAC27D7.08c	SPCC1450.16c
		SPAPB1E7.12	SPAC31A2.11c
		SPCC663.12	SPAC1805.14
		SPAC1805.07c	SPAC23A1.11
		SPAC22E12.04	SPAC4G9.09c
		SPAC644.06c	SPAC343.10
		SPAC13F5.07c	SPAC6C3.08
		SPCC1393.13	SPAC664.07c
		SPAC20H4.03c	SPBC17D1.06
		SPAC22A12.10	SPBC19F8.08
		SPCC1795.10c	SPBC649.03
		SPBC18E5.05c	SPAC637.11
		SPCC5E4.07	SPBC1604.09c
		SPBC947.11c	SPAPB1E7.06c
		SPAC824.09c	SPBC2D10.16
		SPCP1E11.09c	SPBC27.08c
		SPBC649.02	SPBC4B4.06
		SPAC25B8.05	SPAC630.14c
		SPAC926.03	SPAC110.02
		SPBC29A10.02	SPAPJ696.01c
		SPCC1259.05c	SPAC1851.02
		SPAC25B8.19c	SPAC23C11.08
		SPBC651.03c	SPCC736.08
		SPCC18.13	SPAC30D11.10
		SPBC1271.15c	SPAC2C4.09
		SPAC13A11.05	SPAC1834.05
		SPBC776.15c	SPAC824.07
		SPCPB16A4.07	SPAPB17E12.05
		SPAC821.11	SPAC2F7.03c
		SPAP14E8.02	SPBC17A3.05c
		SPBC12D12.05c	SPAC1952.11c
		SPCC16C4.12	SPAC56E4.03
		SPBC839.19	SPAC637.06
		SPAP8A3.14c	SPAC6F12.09
		SPBC6B1.12c	SPBC11B10.02c
		SPCC4G3.11	SPBC405.04c
		SPBC17G9.02c	SPBC21B10.13c
		SPAC607.02c	SPBC651.05c
		SPBC1198.11c	SPBC25H2.08c
		SPBC106.04	SPBC2A9.04c
		SPBC6B1.09c	SPBC106.05c
		SPAC140.04	SPBC32F12.02
		SPCC4B3.16	SPBC215.04
		SPAC30C2.06c	SPBC4F6.06
		SPAC15E1.04	SPBP22H7.08
		SPBC2D10.07c	SPCC1223.15c
		SPAC1F7.14c	SPAC22F8.04
		SPAP27G11.05c	SPBC725.14
		SPBC106.01	SPAC27E2.03c
		SPBPB10D8.07c	SPAC20G4.04c
		SPCC330.21	SPAC3C7.03c
		SPAC2F7.17	SPCC4F11.03c
		SPBC1347.02	SPAC3A12.12
		SPAC25B8.06c	SPCC1223.06
		SPBC18H10.13	SPAC19G12.15c
		SPBC1D7.03	SPAC1952.02
		SPAC1556.08c	SPAC23C11.10
		SPAC9E9.03	SPAC2F3.12c
		SPBC32H8.07	SPAC1006.03c
		SPAC31A2.06	SPAC19B12.11c
		SPCC74.03c	SPAPB17E12.08
		SPAC227.05	SPBC16H5.03c
		SPAC637.10c	SPAC824.02
		SPCC1827.04	SPBC18E5.07
		SPAP27G11.06c	SPBC19G7.10c
		SPAC31A2.15c	SPAC6F6.01
		SPCC548.06c	SPBC16A3.07c
		SPCC645.14c	SPAPYUG7.03c
		SPCC4B3.20	SPBC4B4.07c
		SPAC6F6.12	SPBC2D10.18
		SPAC6B12.18	SPBP16F5.05c
		SPBC16A3.08c	SPCC338.16
		SPBC16E9.19	SPAC22F8.11
		SPAC3A11.08	SPAC25G10.03
		SPBC11G11.05	SPAC1687.12c
		SPBC839.04	SPCC1223.02
		SPBC336.06c	SPAC3C7.04
		SPCC4B3.10c	SPAC3H5.07
		SPBC409.07c	SPAC16A10.05c
		SPBC2A9.06c	SPAC13C5.07
		SPBC19G7.01c	SPAC19A8.11c
		SPAC6F12.06	SPCC4B3.15
		SPBP23A10.17	SPAC1783.05
		SPBP35G2.14	SPBC13G1.08c
		SPBC1815.01	SPAC29A4.20
		SPAC6B12.19	SPBC15C4.05
		SPBC8D2.17	SPAC644.14c
		SPAC806.03c	SPAC6G10.12c
		SPBC646.09c	SPBC11C11.07
		SPAC4F10.14c	SPBC16C6.05
		SPAC27E2.07	SPBC1105.04c
		SPBC25H2.15	SPBC1706.01
		SPBC2D10.09	SPBC2G2.14
		SPBC3H7.15	SPBC577.02
		SPCC285.16c	SPCC1682.01
		SPAC3C7.06c	SPBC2G2.01c
		SPAC1705.03c	SPAC23D3.09
		SPBC1604.11	SPAC222.08c
		SPCC1442.08c	SPAC2G11.12
		SPBC16D10.06	SPCC1753.02c
		SPAC1039.08	SPAC3C7.12
		SPBC23E6.09	SPAC3H5.08c
		SPAC1783.02c	SPAC13A11.04c
		SPAC4C5.04	SPAC19D5.11c
		SPAC1296.06	SPCC794.11c
		SPAC5D6.12	SPAC343.16
		SPBC24C6.13	SPAC18G6.15
		SPBC947.02	SPAC8C9.19
		SPBC947.08c	SPAC22H10.03c
		SPBPJ4664.06	SPBC1604.02c
		SPCC364.03	SPBC1921.03c
		SPBC1539.03c	SPAC2C4.15c
		SPCC777.13	SPAC664.01c
		SPBC1921.07c	SPAC3F10.05c
		SPBC428.02c	SPBC1734.12c
		SPCC306.04c	SPBC28F2.10c
		SPBC530.05	SPBC691.04
		SPCC1919.05	SPBC2F12.11c
		SPAC227.17c	SPBC1105.05
		SPAC15A10.17	SPBC1861.01c
		SPAC959.04c	SPBC30D10.10c
		SPBC19G7.07c	SPBC646.13
		SPAC4F10.05c	SPBP8B7.22
		SPBC27.02c	SPAC1071.08
		SPAC9.12c	SPAC22G7.06c
		SPAP7G5.04c	SPAC23E2.01
		SPBC119.08	SPBC3E7.16c
		SPAC13G6.02c	SPBC839.15c
		SPBC19C2.14	SPAC328.10c
		SPAC26A3.06	SPCC584.01c
		SPAC29A4.16	SPAC890.05
		SPCC1223.11	SPBC12C2.07c
		SPAC1851.04c	SPAC3H5.12c
		SPBC25D12.05	SPAC1F7.01c
		SPBC557.02c	SPCC895.05
		SPCC24B10.04	SPAC1952.07
		SPBC543.09	SPAPB18E9.01
		SPAC1486.11	SPAC56F8.09
		SPAC22A12.04c	SPBC15D4.15
		SPBP8B7.09c	SPAC664.02c
		SPCC736.07c	SPBC16H5.08c
		SPAC4F10.18	SPBC1734.13
		SPBC30D10.16	SPBC215.05
		SPCC417.07c	SPBC428.08c
		SPCC790.02	SPBC6B1.06c
		SPBC2F12.12c	SPBC365.10
		SPBC887.22	SPBC4F6.12
		SPAC12B10.02c	SPBC32F12.08c
		SPAC4F10.15c	SPAC1071.11
		SPCC550.15c	SPCC126.04c
		SPBC27B12.10c	SPAC23H3.05c
		SPBC19G7.17	SPAC30.02c
		SPBC530.01	SPAC343.04c
		SPBC17D1.02	SPAC13G7.07
		SPCC24B10.19c	SPCC1259.03
		SPBC1703.13c	SPAC13G6.10c
		SPAC57A7.04c	SPAC25G10.06
		SPAC1783.08c	SPAC17H9.08
		SPAC26A3.04	SPAC631.02
		SPAC6C3.04	SPAC8E11.07c
		SPCC576.11	SPAC3C7.08c
		SPCC576.12c	SPBC1604.08c
		SPAC13C5.01c	SPAC3G6.06c
		SPCC1322.01	SPBC16H5.11c
		SPBC839.20	SPAC7D4.12c
		SPAC2F7.04	SPAC8E11.05c
		SPAC22G7.04	SPBC1861.03
		SPBC215.02	SPAPB1A10.03
		SPBC354.03	SPBC14C8.04
		SPBC32F12.01c	SPAC6G9.10c
		SPCC330.14c	SPBC36B7.08c
		SPBC17A3.09c	SPBC23G7.15c
		SPBC2D10.13	SPBC215.08c
		SPAC5D6.06c	SPBC31E1.02c
		SPAC1F3.10c	SPAC10F6.05c
		SPAC144.08	SPBP35G2.08c
		SPCC1672.06c	SPCC18.17c
		SPBC21B10.15	SPAC9G1.07
		SPBC725.12	SPBC15D4.09c
		SPCC1322.12c	SPAC3H8.07c
		SPAC24B11.09	SPAC23H3.13c
		SPAC1F3.02c	SPAC27E2.01
		SPBC21B10.10	SPAC17A2.06c
		SPBC3D6.10	SPBC106.19
		SPCC74.06	SPBC21C3.02c
		SPBC21D10.10	SPAC2G11.07c
		SPBC56F2.09c	SPAC694.02
		SPBC19C2.13c	SPBC21H7.04
		SPAC1002.15c	SPBC119.12
		SPCC970.06	SPBC30B4.06c
		SPAC8C9.17c	SPBC1539.06
		SPCC1259.02c	SPBC336.03
		SPAC22E12.19	SPBC1709.18
		SPCC1682.12c	SPBC146.13c
		SPCC777.10c	SPBC23G7.16
		SPCC1840.03	SPBC337.09
		SPAC25H1.05	SPBC8D2.01
		SPCC1672.11c	SPCC24B10.18
		SPBC1703.07	SPAC22H10.07
		SPAC22G7.05	SPAC1B3.03c
		SPCC1442.03	SPAC24B11.13
		SPBC543.07	SPAC9G1.08c
		SPBC19F8.06c	SPBC1604.07
		SPBC23E6.08	SPAC4A8.05c
		SPAPB1A11.01	SPAC1486.04c
		SPBC16G5.15c	SPAC1687.05
		SPBC26H8.08c	SPAC139.01c
		SPAC17A5.08	SPAC6B12.15
		SPBC56F2.12	SPAC17H9.10c
		SPCC1739.03	SPBC16A3.19
		SPAC1486.10	SPAC22E12.14c
		SPBC1A4.02c	SPBC23G7.06c
		SPCC1259.16	SPAC23C11.04c
		SPCC285.09c	SPBC1685.01
		SPBC409.10	SPAC694.06c
		SPCC4B3.17	SPBC32F12.05c
		SPBC56F2.05c	SPBC29A3.03c
		SPCC965.04c	SPBC1539.08
		SPAC1006.09	SPAC926.06c
		SPAC1B3.21	SPBC336.14c
		SPAC26F1.04c	SPBC24C6.05
		SPBC685.08	SPBC337.16
		SPBC27B12.09c	SPBC685.06
		SPAC664.04c	SPAC10F6.13c
		SPBC56F2.08c	SPAC22H10.09
		SPBC19G7.06	SPAC26F1.10c
		SPCC825.01	SPAC2F3.02
		SPBC29A10.13	SPAC9G1.11c
		SPCC1223.09	SPAC3G9.04
		SPBC646.12c	SPAC1486.01
		SPBC776.06c	SPAC12B10.09
		SPCC18.11c	SPCC320.04c
		SPCC736.11	SPAC25H1.07
		SPAC1565.01	SPAC29A4.14c
		SPAC1F12.10c	SPCC970.10c
		SPCC663.04	SPAC4A8.03c
		SPBC354.05c	SPAC18G6.02c
		SPAC1486.02c	SPAC26H5.05
		SPCC1450.05c	SPAPB2B4.02
		SPAC20H4.02	SPAC4H3.07c
		SPAC631.01c	SPBC13G1.10c
		SPAC824.04	SPAC30D11.09
		SPAC11G7.02	SPAC6B12.02c
		SPAC3G6.02	SPAC9G1.12
		SPBC947.10	SPBC16A3.03c
		SPAC4D7.11	SPBC19C7.02
		SPAC6B12.02c	SPBC3B8.05
		SPAC26A3.07c	SPBC530.14c
		SPBP8B7.28c	SPBC29A3.05
		SPCC1235.14	SPBC713.08
		SPAC2C4.16c	SPAC25G10.05c
		SPAC3F10.16c	SPCC830.10
		SPBP4H10.11c	SPCC1672.04c
		SPAC1F7.13c	SPBC16E9.09c
		SPAC14C4.14	SPAC9E9.09c
		SPAC27D7.14c	SPAC17G8.05
			SPAC323.01c
			SPAC31A2.13c
			SPBC31F10.10c
			SPCC191.07
			SPCC613.10
			SPCC1259.16
			SPCC663.04
			SPBC354.05c
			SPCC1450.05c
			SPAC20H4.02
			SPAC631.01c
			SPCC1223.05c
			SPBC4C3.12
			SPBC800.04c
			SPAC824.04
			SPCC553.01c
			SPBC12D12.06
			SPAC11G7.02
			SPCC1919.03c
			SPAC3G6.02
			SPBC947.10
			SPAC4D7.11
			SPBC23G7.08c
			SPAC222.12c
			SPCC1919.10c
			SPBC1734.11
			SPBC577.15c
			SPBC651.10

## Sheet: Fitness standard conditions
gene_id	condition	fitness_mean	fitness_median	p_value	p_corrected
SPAPB2B4.06	YES_32	1.081	1.075	0.00566038	0.00805579
SPAC4H3.03c	YES_32	0.975	0.982	6.93052e-13	2.43938e-12
SPBC1539.10	YES_32	0.928	0.95	2.68947e-11	8.09637e-11
SPAC977.17	YES_32	1.008	1.011	3.37902e-09	8.33124e-09
SPBC337.03	YES_32	1.009	1	0.000391579	0.000627176
SPBC1711.15c	YES_32	1.018	1.015	5.44435e-05	9.44738e-05
SPBC15D4.10c	YES_32	0.878	0.874	2.68536e-23	3.08906e-22
SPBC3H7.13	YES_32	1.01	1.015	9.57402e-05	0.00016296
SPBC29A10.12	YES_32	1.066	1.058	0.00213451	0.00316487
SPBC23G7.04c	YES_32	0.997	0.999	5.06293e-08	1.12316e-07
SPBC557.04	YES_32	1.028	1.028	0.0209519	0.0278984
SPBC365.06	YES_32	0.97	0.965	1.39842e-06	2.77923e-06
SPBC3E7.08c	YES_32	0.981	0.971	6.60758e-11	1.92735e-10
SPBC8D2.02c	YES_32	1.028	1.013	0.0292482	0.0380841
SPBP8B7.18c	YES_32	0.922	0.924	2.64477e-18	1.63374e-17
SPBC902.02c	YES_32	0.903	0.902	4.00533e-28	8.43304e-27
SPBPB8B6.04c	YES_32	1.079	1.07	0.000341993	0.000551571
SPCC18B5.07c	YES_32	0.928	0.94	2.62232e-10	7.14505e-10
SPBP4H10.16c	YES_32	1.087	1.08	0.000115908	0.000195848
SPCC576.01c	YES_32	0.966	0.956	3.17721e-11	9.53985e-11
SPCC970.02	YES_32	1.038	1.033	0.722564	0.752228
SPAC22F3.06c	YES_32	1	1.003	0.0258811	0.0339672
SPBC23G7.12c	YES_32	1.11	1.111	4.36846e-07	9.02262e-07
wt	YES_32	1.044	1.038	1	1
SPCC126.01c	YES_32	0.991	1.001	8.4389e-08	1.83344e-07
SPAC23A1.04c	YES_32	0.995	0.998	4.84193e-05	8.43151e-05
SPBC32H8.02c	YES_32	1.098	1.095	9.75544e-10	2.53671e-09
SPBC725.11c	YES_32	0.979	0.981	4.43635e-229	3.85297e-226
SPAC24B11.08c	YES_32	0.994	0.997	1.2082e-14	5.03271e-14
SPBC582.10c	YES_32	0.998	1	1.25088e-16	6.34387e-16
SPAC13F5.03c	YES_32	0.996	0.991	1.30285e-09	3.35018e-09
SPAC26H5.02c	YES_32	1.031	1.025	0.029531	0.0384091
SPBP8B7.10c	YES_32	0.915	0.932	1.5215e-16	7.58351e-16
SPBC29B5.01	YES_32	0.361	0.365	0	0
SPAC1D4.02c	YES_32	1.064	1.058	0.0601006	0.0755115
SPAC2F3.15	YES_32	1.073	1.069	0.00112784	0.00172528
SPCC1442.17c	YES_32	1.045	1.039	0.919413	0.933657
SPAC1687.15	YES_32	1.057	1.053	2.41122e-09	6.06121e-09
SPAC27F1.08	YES_32	0.972	0.973	9.69573e-08	2.09994e-07
SPAC30D11.13	YES_32	0.966	0.958	3.45481e-13	1.25675e-12
SPCC18B5.01c	YES_32	1.043	1.043	0.815756	0.842431
SPCC18B5.11c	YES_32	1.037	1.03	0.000154077	0.000257338
SPAC5D6.09c	YES_32	0.983	0.979	3.44894e-15	1.5135e-14
SPAC3A11.10c	YES_32	0.98	0.99	3.28453e-08	7.40939e-08
SPCPB16A4.03c	YES_32	0.977	0.966	3.40977e-07	7.10165e-07
SPBC1198.14c	YES_32	1.076	1.067	1.84075e-39	1.99837e-37
SPAP27G11.02	YES_32	1.033	1.031	0.215926	0.249377
SPAC3G9.08	YES_32	0.933	0.943	1.49705e-12	5.11381e-12
SPAC13G7.05	YES_32	1.01	1.028	0.0429828	0.054918
SPBC106.10	YES_32	0.59	0.583	0	0
SPBC1685.07c	YES_32	0.984	0.983	1.42823e-12	4.89799e-12
SPAC1142.08	YES_32	0.834	0.865	1.21381e-11	3.78526e-11
SPAC1142.02c	YES_32	1.011	1.01	0.0182303	0.0244336
SPAC14C4.16	YES_32	0.888	0.89	1.54863e-20	1.24824e-19
SPAC12G12.01c	YES_32	1.077	1.077	1.12296e-07	2.42309e-07
SPAC16E8.14c	YES_32	1.037	1.038	0.220672	0.254436
SPAC17D4.01	YES_32	0.997	0.998	4.22193e-09	1.03071e-08
SPCC330.02	YES_32	0.964	0.966	9.63168e-16	4.4614e-15
SPAC1556.03	YES_32	1.045	1.043	0.837598	0.862423
SPAC20H4.04	YES_32	1.009	0.998	1.71742e-05	3.11719e-05
SPAC22H10.02	YES_32	1.013	1.014	4.8193e-06	9.11888e-06
SPAC27D7.11c	YES_32	1.053	1.037	0.318515	0.356078
SPAC29A4.17c	YES_32	1.021	1.013	0.00277231	0.00407059
SPCP1E11.02	YES_32	1.027	1.021	0.0147553	0.0200862
SPAC17A5.01	YES_32	1.031	1.03	0.0926764	0.113967
SPAC4F10.16c	YES_32	1.057	1.05	0.0454415	0.0578255
SPAC57A10.14	YES_32	0.858	0.855	2.23073e-31	6.98158e-30
SPAC13G7.02c	YES_32	1.056	1.047	0.104027	0.126759
SPAC1805.09c	YES_32	1.052	1.048	0.230235	0.264408
SPAC821.09	YES_32	0.853	0.923	5.84363e-12	1.88319e-11
SPAC6G9.09c	YES_32	0.776	0.78	3.02933e-21	2.67784e-20
SPAC1952.09c	YES_32	1.016	1.01	0.0143318	0.0195634
SPAC19B12.04	YES_32	1.002	1.003	0.00492112	0.00704408
SPBC1271.09	YES_32	1.01	1.007	0.0150629	0.0204808
SPAPB17E12.02	YES_32	0.984	1.002	0.000137529	0.000231032
SPAC27E2.09	YES_32	0.971	0.991	5.01356e-08	1.11363e-07
SPAC1F8.01	YES_32	1.033	1.035	0.250391	0.285027
SPBC1709.13c	YES_32	1.022	1.018	0.00857864	0.0120122
SPBP4H10.20	YES_32	1.022	1.035	0.170198	0.200633
SPBC11G11.03	YES_32	0.936	0.951	1.40669e-08	3.26661e-08
SPAC513.02	YES_32	0.986	0.984	1.24189e-08	2.90137e-08
SPAC23D3.12	YES_32	1.049	1.045	0.39227	0.431933
SPBC146.04	YES_32	1.051	1.048	0.286791	0.322954
SPAC5H10.11	YES_32	0.974	0.98	2.30018e-21	2.0595e-20
SPAC31G5.12c	YES_32	1.002	1.005	2.50246e-17	1.37993e-16
SPAC6B12.04c	YES_32	0.992	0.989	5.92574e-14	2.32113e-13
SPAC458.04c	YES_32	1.032	1.031	0.0250398	0.0329876
SPBC1703.14c	YES_32	0.936	0.94	7.15969e-25	9.94911e-24
SPAC821.07c	YES_32	1.09	1.08	1.11787e-06	2.2396e-06
SPAPB1A10.12c	YES_32	0.996	1	7.28926e-11	2.1173e-10
SPBC17A3.06	YES_32	0.992	0.991	1.02858e-05	1.9017e-05
SPAC8C9.12c	YES_32	0.991	0.983	1.24372e-13	4.72724e-13
SPBC16E9.12c	YES_32	0.859	0.878	3.65915e-18	2.22236e-17
SPBC19F5.01c	YES_32	1.041	1.032	0.745088	0.773129
SPAC9G1.05	YES_32	0.94	0.956	1.22213e-17	6.99455e-17
SPBC3B9.09	YES_32	1.001	1.002	1.85102e-07	3.93782e-07
SPBC21B10.03c	YES_32	0.868	0.889	5.92726e-14	2.32113e-13
SPAPYUK71.03c	YES_32	0.968	0.985	1.47758e-08	3.42208e-08
SPBC543.03c	YES_32	0.913	0.919	1.19154e-16	6.06953e-16
SPBC25B2.04c	YES_32	0.94	0.938	2.73507e-12	9.08379e-12
SPAC589.02c	YES_32	0.736	0.777	5.67421e-17	2.99123e-16
SPBC31F10.12	YES_32	0.843	0.85	4.06582e-24	5.13624e-23
SPBC15D4.02	YES_32	0.983	0.986	1.50281e-06	2.97819e-06
SPAC9G1.06c	YES_32	0.926	0.918	6.95309e-25	9.73993e-24
SPBC337.04	YES_32	1.047	1.042	0.616503	0.651576
SPBC18E5.14c	YES_32	0.969	0.975	1.8406e-10	5.09907e-10
SPBC4.05	YES_32	1.035	1.033	0.0939336	0.115472
SPBC23G7.13c	YES_32	0.978	0.99	1.29739e-10	3.65542e-10
SPBC56F2.03	YES_32	1.028	1.026	0.00141119	0.00213802
SPBC3B9.05	YES_32	1.047	1.051	0.515079	0.554119
SPBC3E7.12c	YES_32	1.013	1.009	7.07159e-07	1.43749e-06
SPBC6B1.02	YES_32	1.048	1.042	0.510451	0.549862
SPBC947.14c	YES_32	1.017	1.019	3.35507e-06	6.42178e-06
SPBPB10D8.01	YES_32	0.997	0.996	1.86797e-16	9.19168e-16
SPBC9B6.03	YES_32	1.053	1.042	0.295509	0.33234
SPBPB8B6.05c	YES_32	1.087	1.081	2.39758e-05	4.30671e-05
SPCC191.11	YES_32	1.037	1.024	0.515582	0.554187
SPBP8B7.06	YES_32	0.82	0.837	2.38649e-22	2.48224e-21
SPCC74.05	YES_32	0.805	0.832	5.37353e-17	2.84134e-16
SPCP1E11.05c	YES_32	0.922	0.926	3.74976e-21	3.28128e-20
SPAC22F3.08c	YES_32	0.943	0.96	7.28042e-12	2.31535e-11
SPBC24C6.04	YES_32	1.031	1.036	0.195739	0.22811
SPCC1393.09c	YES_32	1.074	1.059	0.00365472	0.00531235
SPAC23A1.07	YES_32	0.943	0.956	6.68303e-16	3.14591e-15
SPBC337.11	YES_32	1.049	1.034	0.529201	0.567071
SPAC24B11.12c	YES_32	1.002	0.995	1.2611e-05	2.31924e-05
SPBC646.08c	YES_32	1.055	1.051	0.0434978	0.0555438
SPAC14C4.12c	YES_32	0.953	0.958	1.02415e-17	5.90969e-17
SPAC27D7.02c	YES_32	1.017	1.015	3.53767e-07	7.3636e-07
SPBPB7E8.01	YES_32	0.946	0.964	2.75301e-13	1.01099e-12
SPAC1D4.03c	YES_32	0.999	1.002	2.04192e-10	5.62539e-10
SPAC2F3.16	YES_32	1.016	1.006	0.000630977	0.000990069
SPCC1450.02	YES_32	0.967	0.974	3.45536e-15	1.51374e-14
SPAC29B12.05c	YES_32	1.038	1.042	0.277763	0.313703
SPAC31A2.16	YES_32	1.003	1	3.09785e-09	7.67613e-09
SPCC18B5.03	YES_32	1.035	1.03	0.0872048	0.107467
SPAC5H10.09c	YES_32	1.017	1.023	1.25859e-06	2.51283e-06
SPAC3A12.03c	YES_32	1.032	1.034	0.111496	0.135337
SPCPB1C11.02	YES_32	1.038	1.034	0.401063	0.440636
SPAP27G11.14c	YES_32	0.939	0.95	1.59704e-08	3.68645e-08
SPAC3H1.05	YES_32	0.933	0.944	1.09434e-20	8.94523e-20
SPAC13G7.13c	YES_32	0.96	0.968	5.59315e-15	2.39293e-14
SPBC16A3.14	YES_32	1.054	1.05	0.19503	0.227513
SPAC1002.20	YES_32	1.017	1.019	0.000415492	0.000663641
SPCC11E10.07c	YES_32	1.042	1.039	0.783423	0.810727
SPAC11D3.07c	YES_32	1.086	1.083	0.000419461	0.000669365
SPAC11D3.09	YES_32	1.063	1.071	0.00570008	0.00810564
SPAC1527.02	YES_32	0.937	0.937	1.41902e-07	3.04866e-07
SPCC1442.14c	YES_32	0.996	0.998	1.95086e-08	4.47642e-08
SPAC12G12.07c	YES_32	1.1	1.094	3.35803e-08	7.56537e-08
SPAC17A2.09c	YES_32	1.043	1.049	0.966496	0.974632
SPAC17G8.09	YES_32	1.069	1.067	5.43304e-06	1.023e-05
SPCC330.07c	YES_32	1.042	1.03	0.845079	0.869096
SPAC1565.07c	YES_32	1.008	1.025	0.000352379	0.000567795
SPAC222.07c	YES_32	1.008	1.006	2.34509e-11	7.09654e-11
SPAC23A1.03	YES_32	0.976	0.98	4.91597e-20	3.68857e-19
SPCC70.06	YES_32	1.06	1.062	0.00222292	0.00329174
SPAC16A10.02	YES_32	1.025	1.027	0.000123501	0.000208475
SPAC29B12.10c	YES_32	0.969	0.968	5.14779e-21	4.43757e-20
SPAC2C4.05	YES_32	0.881	0.889	1.38019e-26	2.48434e-25
SPCP1E11.10	YES_32	0.977	0.973	5.32819e-11	1.56733e-10
SPAC17A5.11	YES_32	1.063	1.061	0.00295445	0.00432158
SPAC4G8.13c	YES_32	0.636	0.679	5.04227e-17	2.67841e-16
SPAC589.11	YES_32	1.003	0.994	4.62268e-13	1.66417e-12
SPAC1420.01c	YES_32	1.024	1.024	0.000392683	0.000628654
SPAC1805.12c	YES_32	0.865	0.852	1.82338e-28	4.00913e-27
SPAC8F11.08c	YES_32	0.973	0.984	1.23643e-11	3.85233e-11
SPAC750.08c	YES_32	1.015	1.015	4.63237e-08	1.03292e-07
SPAC19A8.05c	YES_32	1.022	1.028	0.00796742	0.0111879
SPAC19B12.07c	YES_32	1.084	1.077	1.56794e-07	3.35409e-07
SPBC1271.14	YES_32	1.008	1.003	1.55539e-07	3.32929e-07
SPAPB17E12.03	YES_32	0.934	0.927	1.05072e-14	4.40315e-14
SPAC29A4.11	YES_32	1.01	1.017	0.000168493	0.000280875
SPAC20G8.08c	YES_32	1.017	1.018	0.000389794	0.000624605
SPBC1711.05	YES_32	0.935	0.94	3.55192e-15	1.55017e-14
SPAC4F10.02	YES_32	1.01	1.009	7.53446e-08	1.64932e-07
SPAC17H9.19c	YES_32	0.976	0.976	1.51165e-08	3.49632e-08
SPBC1215.01	YES_32	0.962	0.97	5.12008e-09	1.23952e-08
SPAC23H4.08	YES_32	1.018	1.023	0.0020611	0.00306125
SPAC630.09c	YES_32	0.975	0.985	7.72333e-17	3.98675e-16
SPAC323.05c	YES_32	0.973	0.986	1.71112e-10	4.74795e-10
SPBC16D10.08c	YES_32	1.034	1.034	0.100673	0.122974
SPAC6B12.07c	YES_32	0.981	0.99	1.08448e-19	7.75205e-19
SPAC57A7.08	YES_32	1.048	1.043	0.667107	0.699949
SPAC823.03	YES_32	0.951	0.965	2.0286e-15	9.11691e-15
SPAPB1E7.11c	YES_32	0.873	0.915	0.000930098	0.00143352
SPBC17A3.10	YES_32	0.971	0.986	2.31703e-12	7.76967e-12
SPAC8E11.02c	YES_32	0.636	0.668	1.01606e-28	2.32224e-27
SPBC16E9.17c	YES_32	1.033	1.03	0.0161501	0.0217834
SPBC19F8.04c	YES_32	1.025	1.017	0.0227076	0.0300748
SPAC9G1.10c	YES_32	0.998	0.997	3.42991e-06	6.5614e-06
SPBC4.06	YES_32	1.024	1.021	0.00281675	0.00413234
SPBC106.02c	YES_32	0.982	0.988	6.13967e-15	2.61708e-14
SPBC56F2.06	YES_32	0.983	0.984	4.95599e-20	3.71059e-19
SPBC25D12.06	YES_32	0.809	0.843	1.10371e-11	3.45432e-11
SPBC29A3.18	YES_32	1.016	1.01	0.00569184	0.00809723
SPAPB8E5.02c	YES_32	1.032	1.023	0.134947	0.161434
SPAC630.13c	YES_32	0.861	0.871	6.70638e-26	1.07861e-24
SPBC31F10.16	YES_32	0.997	1	1.11864e-08	2.62579e-08
SPBC15D4.06	YES_32	1.021	1.012	0.00464171	0.00666335
SPAPB1E7.05	YES_32	1.013	1.012	3.84572e-08	8.63609e-08
SPBC342.05	YES_32	1.025	1.018	0.000760803	0.00118309
SPBC18H10.07	YES_32	0.948	0.957	1.42747e-14	5.90362e-14
SPBC1685.13	YES_32	0.995	0.99	1.19933e-14	5.00177e-14
SPBC409.19c	YES_32	1.017	1.018	0.00105263	0.00161378
SPBC29B5.03c	YES_32	0.994	0.989	5.64996e-12	1.82416e-11
SPBC26H8.03	YES_32	0.931	0.933	4.12733e-20	3.12383e-19
SPBC577.03c	YES_32	1.015	1.012	8.21833e-06	1.52922e-05
SPBC3D6.09	YES_32	0.962	0.962	6.33044e-23	6.93752e-22
SPBC3H7.03c	YES_32	0.881	0.883	3.21598e-28	6.85417e-27
SPBC713.11c	YES_32	1.052	1.063	0.271541	0.306975
SPBCPT2R1.02	YES_32	1.037	1.03	0.282137	0.318022
SPBPB2B2.13	YES_32	0.991	0.985	4.34466e-11	1.28673e-10
SPBC9B6.07	YES_32	0.727	0.868	3.02103e-12	1.00144e-11
SPBPJ4664.02	YES_32	1.085	1.074	3.18388e-07	6.65512e-07
SPCC1919.10c	YES_32	0.182	0.176	1.22049e-28	2.73396e-27
SPBP8B7.23	YES_32	1.032	1.032	0.027923	0.0364816
SPCC794.15	YES_32	0.907	0.928	1.01751e-11	3.19603e-11
SPCP1E11.06	YES_32	0.928	0.913	7.28661e-18	4.27596e-17
SPAC22F3.12c	YES_32	1.043	1.038	0.872392	0.893745
SPBC24C6.06	YES_32	1.027	1.017	0.0688248	0.0860063
SPBC1105.14	YES_32	0.947	0.959	1.64216e-264	1.90162e-261
SPCC1450.16c	YES_32	0.983	0.988	9.37327e-14	3.61006e-13
SPAC23C11.14	YES_32	1.036	1.042	0.426883	0.466496
SPCC63.14	YES_32	1.016	1.018	4.07042e-07	8.4321e-07
SPAC24C9.08	YES_32	1.014	1.01	4.00615e-08	8.99055e-08
SPBC713.07c	YES_32	0.94	0.945	1.01116e-17	5.84486e-17
SPAC15A10.05c	YES_32	1.02	1.016	1.79878e-06	3.54249e-06
SPAC27D7.13c	YES_32	1.021	1.026	0.000491531	0.00077936
SPCC1020.10	YES_32	1.087	1.09	1.46922e-10	4.11951e-10
SPAC1D4.06c	YES_32	0.928	0.946	5.22203e-08	1.15623e-07
SPAC2F7.08c	YES_32	0.764	0.759	1.39317e-43	2.38891e-41
SPCC1620.07c	YES_32	1.006	1.007	1.34229e-07	2.88739e-07
SPAC31A2.11c	YES_32	0.961	0.969	2.985e-15	1.31765e-14
SPAC31G5.19	YES_32	0.924	0.918	2.57351e-22	2.66083e-21
SPAC5H10.13c	YES_32	1.023	1.018	0.000368263	0.000592015
SPAC3A12.06c	YES_32	1.024	1.02	9.20165e-05	0.000157007
SPAC1071.05	YES_32	0.988	0.985	1.20987e-08	2.82847e-08
SPAPB1A10.05	YES_32	0.997	1.002	7.22562e-11	2.10115e-10
SPAC3H1.06c	YES_32	1.064	1.062	0.000759269	0.00118124
SPBC16D10.07c	YES_32	1.015	1.01	4.02251e-06	7.64453e-06
SPCC11E10.08	YES_32	1.084	1.084	9.75176e-05	0.000165904
SPAC11H11.03c	YES_32	1.057	1.051	0.0692485	0.0865046
SPAC15E1.06	YES_32	0.988	0.996	1.36988e-06	2.72563e-06
SPAC12G12.12	YES_32	1.086	1.08	4.50394e-08	1.00557e-07
SPAC1805.14	YES_32	0.865	0.888	3.52587e-16	1.69652e-15
SPAC1805.08	YES_32	1.028	1.026	0.00454769	0.00653919
SPCC338.11c	YES_32	1.052	1.049	0.260146	0.295149
SPAC15A10.06	YES_32	1.055	1.052	0.121971	0.147076
SPAC222.13c	YES_32	1.041	1.042	0.619888	0.654954
SPAC23A1.11	YES_32	0.792	0.802	2.44642e-30	6.69203e-29
SPAC16C9.05	YES_32	0.989	1.045	0.0452716	0.0576304
SPAC30C2.04	YES_32	1.01	1.016	0.000359926	0.000579418
SPAC2C4.08	YES_32	1.044	1.042	0.969192	0.9765
SPAC1002.03c	YES_32	1.029	1.024	0.0189215	0.0253113
SPAC17C9.09c	YES_32	1.062	1.057	0.00955915	0.0133207
SPAC4G9.09c	YES_32	0.96	0.955	3.38253e-20	2.59402e-19
SPAC5D6.01	YES_32	0.963	0.966	1.12454e-20	9.17053e-20
SPAC16.01	YES_32	1.071	1.055	0.0104482	0.0144841
SPAC1834.03c	YES_32	1.095	1.079	4.09922e-05	7.18864e-05
SPAC9E9.12c	YES_32	1.046	1.04	0.729093	0.75789
SPAC823.02	YES_32	0.992	0.994	1.30507e-15	5.9421e-15
SPAC19D5.07	YES_32	1.009	1.012	0.000389662	0.000624605
SPAC19B12.08	YES_32	1.085	1.07	0.0001525	0.00025495
SPBC1289.10c	YES_32	0.945	0.952	1.71635e-16	8.50587e-16
SPAPB17E12.04c	YES_32	1.002	1.002	1.60033e-06	3.16244e-06
SPAC29E6.10c	YES_32	0.995	1.002	3.07407e-07	6.4372e-07
SPBC1734.11	YES_32	0.099	0.091	6.5755e-23	7.1609e-22
SPAC4F8.10c	YES_32	0.998	0.996	1.50109e-10	4.1987e-10
SPAC186.01	YES_32	1.056	1.049	0.133108	0.159565
SPBC1271.05c	YES_32	1.049	1.058	0.470687	0.510033
SPAC521.04c	YES_32	1.017	1.017	1.0385e-05	1.91902e-05
SPAC24H6.10c	YES_32	1.044	1.047	0.980753	0.986717
SPBC14F5.07	YES_32	1.04	1.035	0.356063	0.395449
SPAC343.10	YES_32	0.955	0.963	4.77811e-11	1.41149e-10
SPBC16G5.05c	YES_32	1.04	1.034	0.536022	0.573849
SPAC6C3.08	YES_32	0.851	0.848	2.26763e-36	1.27061e-34
SPAC664.07c	YES_32	0.917	0.921	2.26389e-37	1.51245e-35
SPBC1709.14	YES_32	1.042	1.042	0.662684	0.695517
SPAC823.13c	YES_32	0.991	0.99	2.33882e-17	1.29586e-16
SPAPB24D3.07c	YES_32	1.017	1.008	6.59825e-06	1.23571e-05
SPBC17D1.06	YES_32	0.909	0.916	7.7121e-21	6.47145e-20
SPAC8E11.03c	YES_32	0.997	0.996	2.56484e-15	1.14234e-14
SPBC1711.09c	YES_32	1.041	1.034	0.52417	0.562527
SPBC19F8.08	YES_32	0.723	0.755	6.46628e-20	4.73921e-19
SPACUNK12.02c	YES_32	1.003	1.002	1.12607e-12	3.88863e-12
SPBC405.03c	YES_32	1.004	1.002	3.76448e-10	1.01143e-09
SPBC649.03	YES_32	0.882	0.879	1.37871e-20	1.11647e-19
SPBC25H2.05	YES_32	1.02	1.015	0.00626373	0.00886363
SPBC2A9.03	YES_32	1.028	1.018	0.0402326	0.0515242
SPAPJ691.03	YES_32	1	0.996	1.35601e-10	3.80822e-10
SPAC637.11	YES_32	0.936	0.937	4.27086e-19	2.8104e-18
SPBC32C12.03c	YES_32	1.017	1.012	2.38248e-05	4.28402e-05
SPBC1604.09c	YES_32	0.918	0.911	2.7053e-31	8.39125e-30
SPAPB1E7.06c	YES_32	0.943	0.929	1.2197e-17	6.99215e-17
SPBC342.06c	YES_32	0.945	0.944	4.90557e-26	8.23283e-25
SPBC19F8.01c	YES_32	1.021	1.016	7.35017e-07	1.49237e-06
SPBC1685.14c	YES_32	0.998	0.996	1.24255e-20	1.00856e-19
SPBC428.15	YES_32	1.029	1.022	0.0151152	0.0205439
SPBC2D10.16	YES_32	0.919	0.974	4.65267e-09	1.13031e-08
SPBC27.08c	YES_32	0.963	0.974	6.74878e-17	3.51503e-16
SPBC577.13	YES_32	1.03	1.024	0.00404142	0.00584023
SPBC4B4.06	YES_32	1.001	0.974	0.120951	0.145897
SPBC428.10	YES_32	1.018	1.025	2.31358e-08	5.27042e-08
SPBC725.01	YES_32	0.955	0.954	4.47928e-15	1.94028e-14
SPBCPT2R1.08c	YES_32	1.035	1.031	0.118659	0.143382
SPCC11E10.04	YES_32	1.008	1.006	1.87331e-09	4.75376e-09
SPBC9B6.09c	YES_32	1.038	1.034	0.167449	0.197728
SPCC1183.10	YES_32	1.087	1.094	1.53295e-07	3.28326e-07
SPCC23B6.04c	YES_32	0.957	0.957	1.35647e-15	6.15192e-15
SPBP8B7.25	YES_32	0.91	0.919	6.67638e-32	2.20893e-30
SPAC1093.06c	YES_32	1.026	1.023	0.00817766	0.0114646
SPCP25A2.02c	YES_32	1.002	0.992	4.80473e-07	9.90601e-07
SPBC24C6.09c	YES_32	1.108	1.102	7.71997e-15	3.27462e-14
SPCC1672.03c	YES_32	1.019	1.02	1.40731e-06	2.79371e-06
SPAC23C4.02	YES_32	1.05	1.038	0.368808	0.408428
SPBC365.07c	YES_32	1.076	1.072	7.23805e-05	0.00012448
SPCC663.08c	YES_32	1.037	1.034	0.135271	0.161767
SPAC24C9.14	YES_32	1.043	1.055	0.895719	0.913333
SPBC725.07	YES_32	0.994	1	3.31701e-11	9.92531e-11
SPAC15A10.09c	YES_32	1.045	1.038	0.894316	0.912438
SPCC11E10.05c	YES_32	0.987	0.987	2.08996e-13	7.78192e-13
SPAC1F12.05	YES_32	1.033	1.028	0.0296045	0.0384903
SPAC2F7.09c	YES_32	1.024	1.022	0.00112098	0.00171631
SPCC16A11.04	YES_32	1.011	1.01	6.77176e-06	1.26615e-05
SPAC328.01c	YES_32	0.986	0.992	6.85982e-12	2.18834e-11
SPCC417.12	YES_32	1.066	1.063	0.00135042	0.00204862
SPAC630.14c	YES_32	0.91	0.916	5.12627e-17	2.71888e-16
SPAC3A12.09c	YES_32	1.037	1.038	0.119186	0.143968
SPAC110.02	YES_32	0.979	0.988	2.31626e-10	6.35097e-10
SPAPJ696.01c	YES_32	0.96	0.969	4.88898e-17	2.60097e-16
SPAC3H1.10	YES_32	1.076	1.076	3.68209e-05	6.48331e-05
SPAC14C4.15c	YES_32	1.07	1.056	0.00159842	0.00240074
SPBC16E9.02c	YES_32	1.02	1.016	0.000284143	0.000461267
SPAC11E3.10	YES_32	1.01	1.007	1.2061e-05	2.22045e-05
SPCC1223.05c	YES_32	0.613	0.699	7.62241e-17	3.94051e-16
SPAC11D3.17	YES_32	1.095	1.09	1.61721e-11	4.97185e-11
SPAC1296.01c	YES_32	1.026	1.026	0.000299001	0.000484482
SPAC15E1.09	YES_32	1.013	1.013	8.90217e-08	1.93168e-07
SPCC1450.11c	YES_32	1.029	1.021	0.0254915	0.0335445
SPAC139.04c	YES_32	1.059	1.055	0.0142101	0.0194124
SPAC1805.15c	YES_32	1.01	1.007	1.97476e-09	4.99295e-09
SPAC1851.02	YES_32	0.929	0.929	7.87741e-21	6.59425e-20
SPCC417.06c	YES_32	1.027	1.022	0.0284079	0.0370871
SPAC15A10.10	YES_32	1.062	1.058	0.00896915	0.0125337
SPAC22A12.06c	YES_32	1.012	1.006	9.59107e-10	2.49583e-09
SPAC23C11.08	YES_32	0.962	0.969	3.43671e-08	7.7376e-08
SPCC736.08	YES_32	0.957	0.963	2.66385e-17	1.46427e-16
SPAC16C9.06c	YES_32	1.16	1.172	2.65427e-11	7.99735e-11
SPAC30D11.10	YES_32	0.961	0.952	8.52069e-16	3.96795e-15
SPAC2C4.09	YES_32	1.001	0.996	6.36403e-12	2.03766e-11
SPAC1002.05c	YES_32	1.037	1.038	0.14465	0.17239
SPAC17D4.03c	YES_32	1.03	1.031	0.0406428	0.052024
SPAC4H3.02c	YES_32	0.983	0.98	6.86316e-11	2.00022e-10
SPAC5D6.08c	YES_32	0.997	0.998	3.23732e-16	1.56201e-15
SPAC1751.01c	YES_32	1.024	1.024	2.89208e-05	5.14707e-05
SPAC1834.05	YES_32	0.874	0.867	1.10405e-21	1.02553e-20
SPACUNK4.17	YES_32	0.996	0.998	8.01658e-13	2.81025e-12
SPAC824.07	YES_32	0.965	0.969	6.8156e-38	5.14726e-36
SPAC19G12.02c	YES_32	0.982	0.976	7.12371e-16	3.34882e-15
SPAC19B12.10	YES_32	1.074	1.068	0.000707455	0.00110458
SPBC1289.16c	YES_32	1.065	1.055	0.00378346	0.00549029
SPAPB17E12.05	YES_32	0.786	0.797	6.26529e-26	1.01709e-24
SPAC2F7.03c	YES_32	0.89	0.899	1.7625e-17	9.90696e-17
SPAC20H4.05c	YES_32	1.024	1.015	0.00899282	0.0125617
SPBC17A3.05c	YES_32	0.617	0.864	1.63069e-12	5.54308e-12
SPAC4F8.11	YES_32	0.959	0.956	4.86416e-18	2.90345e-17
SPAC1952.11c	YES_32	0.943	0.934	3.04931e-26	5.21837e-25
SPBC12C2.02c	YES_32	1.018	1.025	0.000123709	0.000208725
SPAC56E4.03	YES_32	0.925	0.923	6.72747e-22	6.42067e-21
SPAC25B8.17	YES_32	1.005	1.006	4.05135e-10	1.08515e-09
SPBC14F5.10c	YES_32	1.039	1.041	0.315378	0.353199
SPAC637.06	YES_32	0.975	0.98	1.11641e-10	3.18232e-10
SPAC3A12.17c	YES_32	1.038	1.035	0.208894	0.242061
SPBC16G5.16	YES_32	1.039	1.034	0.46396	0.503215
SPAC6F12.09	YES_32	0.751	0.76	2.04309e-39	2.15082e-37
SPAC688.06c	YES_32	1.016	1.011	8.24744e-09	1.96378e-08
SPBC1718.02	YES_32	1.038	1.036	0.278914	0.3149
SPAC823.14	YES_32	1.004	1	4.10566e-11	1.21906e-10
SPBC11B10.02c	YES_32	0.962	0.965	1.80352e-20	1.44365e-19
SPBC17D1.07c	YES_32	1.054	1.051	0.0290995	0.0379188
SPAC8F11.03	YES_32	0.997	0.988	1.45296e-11	4.49072e-11
SPBC1773.06c	YES_32	1.024	1.018	1.77613e-07	3.78312e-07
SPACUNK4.11c	YES_32	0.937	0.936	1.87606e-26	3.34227e-25
SPBC405.04c	YES_32	0.885	0.89	2.21399e-19	1.52607e-18
SPBC21B10.13c	YES_32	0.542	0.552	9.3229e-25	1.27011e-23
SPBC106.12c	YES_32	1.001	0.995	8.94721e-11	2.58806e-10
SPBC651.05c	YES_32	0.962	0.964	1.28763e-14	5.33798e-14
SPBC25H2.08c	YES_32	0.952	0.954	1.05385e-18	6.71758e-18
SPBC2A9.04c	YES_32	0.989	0.994	6.18079e-10	1.63162e-09
SPBC106.05c	YES_32	0.961	0.954	2.27984e-17	1.26723e-16
SPAC688.10	YES_32	0.982	0.984	1.03054e-20	8.46356e-20
SPBC32F12.02	YES_32	0.838	0.872	3.75464e-20	2.86045e-19
SPBC1604.18c	YES_32	1.032	1.028	0.102697	0.125339
SPAPB1E7.08c	YES_32	1.042	1.036	0.685928	0.717962
SPBC354.13	YES_32	0.973	0.974	1.39993e-17	7.97273e-17
SPBC215.04	YES_32	0.889	0.889	9.67123e-38	6.85671e-36
SPBC16A3.06	YES_32	1.003	1.004	9.58408e-17	4.91804e-16
SPBC4B4.04	YES_32	0.931	0.944	1.22378e-20	9.95644e-20
SPBC2D10.20	YES_32	1.053	1.045	0.17051	0.200933
SPBC2D10.04	YES_32	1.007	1.01	7.86465e-08	1.71943e-07
SPBC582.09	YES_32	1.058	1.051	0.0287151	0.0374602
SPBC4C3.12	YES_32	0.33	0.353	5.31713e-41	6.84138e-39
SPBC4F6.06	YES_32	0.592	0.466	3.88467e-18	2.35111e-17
SPBC776.01	YES_32	0.998	1.002	1.56151e-10	4.35717e-10
SPBP22H7.08	YES_32	0.808	0.802	2.25269e-23	2.60862e-22
SPCC1223.03c	YES_32	1.03	1.022	0.00495283	0.00708654
SPBP16F5.03c	YES_32	1.01	1.002	0.000677333	0.00105993
SPCC1223.15c	YES_32	0.876	0.872	4.87444e-23	5.39294e-22
SPBP8B7.30c	YES_32	1.04	1.036	0.457167	0.496777
SPAC1006.06	YES_32	1.036	1.035	0.19547	0.22795
SPCP31B10.06	YES_32	1.009	1.01	4.06939e-06	7.7294e-06
SPAC22F8.04	YES_32	0.796	0.802	2.59877e-25	3.84176e-24
SPBC29B5.02c	YES_32	1.067	1.069	0.00147865	0.00223438
SPCC16A11.01	YES_32	0.996	1	1.49621e-09	3.82195e-09
SPAC23D3.01	YES_32	1.024	1.024	0.000148583	0.000249001
SPBC3D6.02	YES_32	0.995	0.994	1.73187e-17	9.78297e-17
SPCC737.07c	YES_32	1.008	1.006	6.31883e-12	2.02506e-11
SPAC25B8.11	YES_32	1.012	1.009	3.15346e-08	7.1276e-08
SPBC725.14	YES_32	0.951	0.957	4.67803e-18	2.80198e-17
SPAC167.04	YES_32	0.989	0.988	1.89507e-20	1.50652e-19
SPAC27E2.03c	YES_32	0.884	0.901	2.46729e-20	1.90899e-19
SPCC11E10.09c	YES_32	1.034	1.024	0.083834	0.103533
SPAC20G4.04c	YES_32	0.89	0.891	3.60338e-31	1.1078e-29
SPAC2F7.10	YES_32	1.022	1.016	0.0015543	0.00233751
SPCC16C4.06c	YES_32	1.067	1.061	8.49298e-05	0.0001452
SPAC3C7.03c	YES_32	0.92	0.976	0.00422505	0.00609797
SPAC328.04	YES_32	1.028	1.019	0.0475726	0.0603385
SPCC4F11.03c	YES_32	0.936	0.94	2.77223e-17	1.51665e-16
SPAC637.03	YES_32	1.013	1.011	7.13459e-09	1.70935e-08
SPAC3A12.12	YES_32	0.9	0.885	2.48745e-23	2.8709e-22
SPAC11D3.06	YES_32	1.048	1.042	0.545069	0.582279
SPBC119.16c	YES_32	1.025	1.026	0.00280721	0.00412008
SPAC3H1.13	YES_32	1.058	1.058	0.0210038	0.0279568
SPAC15A10.03c	YES_32	1.039	1.033	0.489597	0.528875
SPBC16E9.07	YES_32	1.007	1.006	5.05007e-10	1.34231e-09
SPAC11E3.12	YES_32	1.033	1.034	0.161374	0.190814
SPCC1223.06	YES_32	0.8	0.8	8.07013e-37	5.09739e-35
SPAC11D3.18c	YES_32	1.063	1.061	0.0338285	0.0437203
SPAC12B10.01c	YES_32	1.046	1.046	0.828914	0.854749
SPAC1687.23c	YES_32	1.014	1.007	4.19469e-07	8.67402e-07
SPCC1682.08c	YES_32	1.037	1.035	0.256348	0.291507
SPAC13C5.03	YES_32	1.052	1.047	0.17314	0.203687
SPAC19G12.15c	YES_32	0.812	0.822	1.14301e-18	7.23282e-18
SPAC1952.02	YES_32	0.949	0.95	1.46622e-16	7.35015e-16
SPCC417.09c	YES_32	1.033	1.034	0.0467138	0.059336
SPAC15A10.11	YES_32	1.117	1.109	8.54847e-12	2.69486e-11
SPAC22H10.11c	YES_32	0.965	0.979	7.24074e-12	2.30562e-11
SPAC23C11.10	YES_32	0.874	0.881	4.8587e-38	4.01884e-36
SPCC74.04	YES_32	1.062	1.06	0.0192201	0.0256909
SPAC1705.02	YES_32	1.112	1.102	1.79578e-08	4.12875e-08
SPAC30D11.11	YES_32	0.968	0.96	1.26513e-11	3.9347e-11
SPAC2F3.12c	YES_32	1.009	1.006	1.68051e-09	4.27698e-09
SPAC1006.03c	YES_32	0.753	0.849	4.39828e-14	1.74226e-13
SPAC17G6.02c	YES_32	1.075	1.074	1.94875e-06	3.82483e-06
SPAC56F8.02	YES_32	0.972	0.98	5.99259e-15	2.55753e-14
SPAC630.11	YES_32	0.989	0.986	8.90882e-15	3.76511e-14
SPAC1782.08c	YES_32	1.039	1.033	0.450778	0.490141
SPAC1851.03	YES_32	0.944	0.937	1.18241e-15	5.41911e-15
SPAP8A3.13c	YES_32	0.986	0.99	1.1019e-22	1.17424e-21
SPAC890.07c	YES_32	1.031	1.022	0.235502	0.270011
SPAC1A6.01c	YES_32	0.937	0.946	7.20326e-27	1.33107e-25
SPAC19B12.11c	YES_32	0.789	0.821	6.61233e-24	7.94853e-23
SPBC12C2.08	YES_32	1.006	1.002	1.26232e-08	2.94712e-08
SPAPB17E12.08	YES_32	0.86	0.866	5.15639e-38	4.16589e-36
SPAC30.01c	YES_32	1.01	1.018	2.914e-08	6.61217e-08
SPAC20H4.10	YES_32	1.089	1.086	4.46339e-06	8.46387e-06
SPBC18A7.02c	YES_32	1.049	1.054	0.5208	0.559276
SPAC19E9.01c	YES_32	1.066	1.065	0.00128815	0.00195673
SPBC12C2.05c	YES_32	1.039	1.034	0.423901	0.463675
SPAC56E4.06c	YES_32	1.017	1.013	2.74392e-07	5.76671e-07
SPAC25H1.04	YES_32	1.057	1.054	0.0143513	0.0195823
SPBC14F5.13c	YES_32	1.034	1.034	0.0356965	0.0459805
SPAC3C7.02c	YES_32	1.022	1.02	7.95976e-08	1.73695e-07
SPBC16H5.03c	YES_32	0.885	0.891	1.64218e-34	7.13116e-33
SPAC6F12.12	YES_32	1.014	1.01	8.44796e-09	2.00878e-08
SPAC824.02	YES_32	0.514	0.329	1.4988e-16	7.49182e-16
SPBC11B10.05c	YES_32	1.006	0.999	2.84959e-09	7.09132e-09
SPBC17D11.04c	YES_32	0.977	0.979	1.20318e-24	1.61384e-23
SPAC9.05	YES_32	0.992	0.993	5.72777e-12	1.84756e-11
SPBC18E5.07	YES_32	0.953	0.955	4.15464e-18	2.50577e-17
SPBC19G7.10c	YES_32	0.879	0.889	2.28941e-20	1.77929e-19
SPACUNK4.13c	YES_32	1.013	1.013	1.08514e-09	2.80072e-09
SPBC409.11	YES_32	1.027	1.019	0.00563969	0.00802962
SPBC21C3.03	YES_32	1.033	1.042	0.414515	0.45441
SPBC1105.08	YES_32	0.978	0.974	2.82405e-18	1.73029e-17
SPBC651.10	YES_32	0.254	0.246	3.48909e-15	1.52659e-14
SPBC26H8.09c	YES_32	0.983	0.981	3.94778e-09	9.67177e-09
SPBC2D10.15c	YES_32	1.042	1.03	0.778315	0.805681
SPBC1105.09	YES_32	1.037	1.039	0.421008	0.461091
SPAC6F6.01	YES_32	0.985	0.984	8.57813e-20	6.2344e-19
SPBC16A3.07c	YES_32	0.417	0.256	1.02956e-09	2.67117e-09
SPAPYUG7.03c	YES_32	0.807	0.806	1.36484e-30	3.91855e-29
SPBC359.06	YES_32	1.021	1.022	3.99534e-05	7.01487e-05
SPBC21B10.08c	YES_32	1.021	1.023	3.56392e-06	6.79904e-06
SPBC16E9.11c	YES_32	0.998	1.002	3.20417e-16	1.54816e-15
SPBC4B4.07c	YES_32	0.896	0.912	3.21259e-15	1.41452e-14
SPBC2G2.05	YES_32	1.071	1.058	0.000562842	0.000887165
SPBC2D10.18	YES_32	0.853	0.848	3.09154e-28	6.62963e-27
SPBC609.02	YES_32	1.017	1.013	2.5986e-06	5.02926e-06
SPBC56F2.14	YES_32	1.03	1.027	0.0435045	0.0555438
SPBC530.06c	YES_32	1.015	1.01	1.2125e-05	2.23104e-05
SPBC800.04c	YES_32	0.609	0.683	6.26149e-12	2.01039e-11
SPBP4H10.08	YES_32	1.035	1.027	0.112331	0.136209
SPCC1322.03	YES_32	1.004	0.998	3.81171e-13	1.3808e-12
SPBP16F5.05c	YES_32	0.952	0.959	1.00976e-13	3.87616e-13
SPCC1259.04	YES_32	0.998	0.987	0.0235533	0.0311355
SPCC338.16	YES_32	0.925	0.928	9.23454e-18	5.3468e-17
SPBPB2B2.05	YES_32	1.052	1.053	0.229401	0.263538
SPAC1039.05c	YES_32	1.058	1.062	0.096972	0.118955
SPCP31B10.07	YES_32	0.906	0.913	2.20928e-22	2.30481e-21
SPAC22F8.11	YES_32	0.752	0.78	4.66631e-27	8.76257e-26
SPBC2F12.03c	YES_32	1.186	1.194	1.06919e-25	1.6582e-24
SPCC18B5.05c	YES_32	1.033	1.029	0.0612887	0.0768931
SPAC23D3.03c	YES_32	1.011	1.01	2.25123e-08	5.1351e-08
SPBC3E7.09	YES_32	1.019	1.016	3.41966e-05	6.0396e-05
SPCC757.07c	YES_32	1.004	1.006	1.2279e-16	6.23645e-16
SPAC25G10.03	YES_32	0.916	0.921	4.47242e-21	3.88429e-20
SPBC800.11	YES_32	1.057	1.056	0.0371692	0.0477713
SPAC1687.12c	YES_32	0.96	0.955	1.04605e-15	4.81959e-15
SPAC27F1.05c	YES_32	1.028	1.022	0.00743903	0.0104628
SPCC1223.02	YES_32	1	1	8.28224e-07	1.67379e-06
SPAC212.08c	YES_32	1.011	1.007	1.59229e-08	3.67792e-08
SPAC2G11.05c	YES_32	0.993	0.988	2.70143e-15	1.2001e-14
SPCC1739.10	YES_32	1.009	1.015	8.28568e-06	1.54092e-05
SPAC3C7.09	YES_32	1.028	1.023	0.00257883	0.00380096
SPAC328.06	YES_32	1.008	1.005	7.97103e-07	1.61371e-06
SPCC4G3.10c	YES_32	1.024	1.018	0.00117748	0.00179568
SPAC644.11c	YES_32	1.019	1.015	1.77572e-07	3.78312e-07
SPAC3C7.04	YES_32	0.805	0.796	4.56124e-28	9.48848e-27
SPAC11E3.04c	YES_32	1.033	1.025	0.184955	0.216487
SPAC3H5.07	YES_32	0.751	0.774	9.82436e-25	1.3332e-23
SPAC15E1.05c	YES_32	1.013	1.012	0.000245699	0.000401864
SPBC1773.04	YES_32	1.038	1.043	0.536595	0.574109
SPAC1296.04	YES_32	1.008	1	3.30565e-07	6.89305e-07
SPCC1223.13	YES_32	1.084	1.077	3.24816e-05	5.7484e-05
SPAC11E3.01c	YES_32	1.032	1.019	0.18822	0.219717
SPAC139.05	YES_32	1.029	1.027	0.0132906	0.0182064
SPAC16A10.05c	YES_32	0.855	0.929	1.90497e-11	5.81533e-11
SPCC1795.01c	YES_32	1.034	1.027	0.0607475	0.0762417
SPAC13C5.07	YES_32	0.929	0.946	1.40997e-09	3.61226e-09
SPAC1B3.17	YES_32	1.018	1.015	3.61289e-05	6.36469e-05
SPAC19A8.11c	YES_32	0.959	0.954	5.0942e-06	9.6233e-06
SPCC4B3.15	YES_32	0.943	0.944	8.86351e-20	6.42836e-19
SPAC15A10.16	YES_32	1.044	1.044	0.967466	0.975327
SPAC23C4.05c	YES_32	1.028	1.029	0.0156422	0.0211856
SPAC23C4.16c	YES_32	1.015	1.015	4.59485e-06	8.70365e-06
SPCC757.04	YES_32	1.021	1.02	0.000142704	0.000239379
SPAC1782.01	YES_32	1.023	1.019	0.000541996	0.000855861
SPAC31G5.10	YES_32	0.999	1.003	4.62841e-14	1.82302e-13
SPAC2F3.18c	YES_32	0.988	0.994	4.59283e-15	1.98698e-14
SPAC10F6.11c	YES_32	1.047	1.041	0.640092	0.673638
SPAC17G6.05c	YES_32	1.052	1.047	0.221071	0.254811
SPAC630.15	YES_32	0.981	0.984	1.1663e-21	1.07759e-20
SPAC1783.05	YES_32	0.909	0.923	3.32652e-13	1.21263e-12
SPAC18B11.07c	YES_32	1.064	1.042	0.0835026	0.103161
SPAPB1E7.04c	YES_32	0.957	0.957	2.19029e-26	3.86248e-25
SPAC8C9.14	YES_32	1.013	1.013	1.66418e-07	3.5512e-07
SPAC1A6.04c	YES_32	1.009	1.007	1.4339e-05	2.61913e-05
SPAC1B2.04	YES_32	1.064	1.052	0.0229421	0.0303623
SPBC13G1.08c	YES_32	0.816	0.814	3.10435e-23	3.54753e-22
SPAPB17E12.12c	YES_32	1.052	1.05	0.248538	0.283554
SPAC32A11.02c	YES_32	1.052	1.056	0.222179	0.256003
SPAC222.14c	YES_32	0.974	0.983	1.10692e-12	3.8263e-12
SPBC18E5.11c	YES_32	1.05	1.032	0.574994	0.611426
SPAC4G8.04	YES_32	0.913	0.954	4.47791e-13	1.6154e-12
SPAC1A6.09c	YES_32	1.059	1.051	0.12377	0.149142
SPAC29A4.20	YES_32	0.95	0.957	1.47002e-16	7.35857e-16
SPBC15C4.05	YES_32	0.984	0.992	2.98268e-20	2.29244e-19
SPAC644.14c	YES_32	0.923	0.938	1.99001e-20	1.56764e-19
SPAC3C7.05c	YES_32	1.033	1.034	0.0597085	0.0750461
SPBC16H5.04	YES_32	1.007	1.006	5.4512e-09	1.31693e-08
SPAC6G9.04	YES_32	0.999	1.001	9.68246e-11	2.77761e-10
SPAC6G10.12c	YES_32	0.933	0.938	1.51086e-16	7.54126e-16
SPBC1734.07c	YES_32	0.978	0.982	8.98322e-20	6.50161e-19
SPBC1289.14	YES_32	0.998	1	5.64958e-15	2.4141e-14
SPBC17F3.01c	YES_32	1.004	1.015	1.45175e-07	3.11705e-07
SPAC9.10	YES_32	1.01	1.012	7.53874e-06	1.40653e-05
SPBC211.06	YES_32	1.009	1.007	1.69487e-10	4.71038e-10
SPBC1D7.01	YES_32	1.021	1.013	0.000100628	0.000171028
SPACUNK4.16c	YES_32	0.979	0.982	1.05341e-19	7.54544e-19
SPBC418.01c	YES_32	1.041	1.034	0.688516	0.71937
SPBC21C3.08c	YES_32	1.091	1.084	1.01788e-07	2.20319e-07
SPBC1105.10	YES_32	0.974	0.98	4.12134e-11	1.22268e-10
SPBC660.07	YES_32	0.966	0.96	1.7533e-21	1.58207e-20
SPBC27.04	YES_32	1.032	1.027	0.0457614	0.0581901
SPBC11C11.07	YES_32	0.854	0.871	1.47815e-10	4.14119e-10
SPAC6F6.13c	YES_32	0.988	0.989	1.95166e-16	9.57638e-16
SPBC32H8.06	YES_32	0.999	1	1.24126e-15	5.66643e-15
SPBC16C6.05	YES_32	0.896	0.908	8.34281e-25	1.14557e-23
SPBC1105.04c	YES_32	0.423	0.429	4.48286e-46	1.11239e-43
SPBC36.07	YES_32	1.01	1.008	2.71022e-12	9.00987e-12
SPBC21C3.11	YES_32	1.018	1.015	2.99991e-05	5.33079e-05
SPBC1706.01	YES_32	0.818	0.826	2.96495e-43	4.68193e-41
SPBC4B4.10c	YES_32	1.057	1.053	0.0358082	0.0460902
SPBC30D10.09c	YES_32	1.071	1.07	2.76036e-05	4.93033e-05
SPBC2G2.14	YES_32	0.859	0.868	6.98309e-31	2.05587e-29
SPBC609.03	YES_32	1.031	1.026	0.0823269	0.101817
SPBC577.02	YES_32	0.833	0.831	1.95693e-27	3.88479e-26
SPBC691.03c	YES_32	0.962	0.965	6.64932e-21	5.6617e-20
SPBC83.05	YES_32	1.046	1.035	0.725383	0.754711
SPBP4H10.12	YES_32	1.042	1.034	0.763293	0.791074
SPCC1494.10	YES_32	0.955	0.964	4.51748e-18	2.71049e-17
SPBP16F5.08c	YES_32	1.045	1.035	0.881045	0.901015
SPCC1682.01	YES_32	0.688	0.718	4.0256e-24	5.104e-23
SPCC584.03c	YES_32	1.04	1.032	0.365498	0.405151
SPBPB2B2.10c	YES_32	1.024	1.021	0.00149193	0.00225151
SPAC1071.02	YES_32	1.003	1.003	3.55119e-10	9.57086e-10
SPCPB1C11.03	YES_32	0.992	0.986	8.74641e-09	2.07265e-08
SPAC22G7.02	YES_32	1.116	1.104	1.70027e-10	4.7216e-10
SPBC2G2.01c	YES_32	1.01	1.018	0.0117573	0.0162211
SPAC23D3.09	YES_32	0.798	0.819	1.19382e-24	1.60749e-23
SPBC3E7.11c	YES_32	1.046	1.044	0.667707	0.700366
SPCC794.01c	YES_32	1.024	1.019	9.57838e-06	1.77658e-05
SPAC25H1.02	YES_32	1.043	1.047	0.869574	0.891121
SPBC839.06	YES_32	1.05	1.043	0.288416	0.324678
SPAC186.05c	YES_32	1.028	1.026	0.00180991	0.00270087
SPAC27F1.06c	YES_32	1.027	1.023	0.00311884	0.00455271
SPCC1235.12c	YES_32	1.08	1.081	4.8745e-08	1.08621e-07
SPAC222.08c	YES_32	0.942	0.938	2.42421e-19	1.65456e-18
SPAC2G11.12	YES_32	0.837	0.879	2.32449e-15	1.03929e-14
SPCC1753.02c	YES_32	0.844	0.834	1.54457e-34	6.7922e-33
SPAC458.02c	YES_32	0.998	0.996	2.16663e-12	7.28641e-12
SPAC328.09	YES_32	1.042	1.043	0.714407	0.74463
SPCC553.01c	YES_32	0.736	0.924	5.10551e-09	1.23686e-08
SPAC869.10c	YES_32	1.028	1.022	0.00218683	0.00324106
SPAC3C7.12	YES_32	0.703	0.717	2.7894e-27	5.41361e-26
SPAC11E3.08c	YES_32	1.054	1.046	0.10149	0.123928
SPBC12C2.04	YES_32	1.045	1.045	0.838538	0.86288
SPAC3H5.08c	YES_32	0.91	0.91	3.68204e-34	1.47027e-32
SPAC1687.09	YES_32	1.038	1.031	0.300518	0.337645
SPBC1773.08c	YES_32	1.033	1.032	0.0201223	0.0268452
SPAC13A11.03	YES_32	1.042	1.021	0.825419	0.851397
SPCC1235.05c	YES_32	1.064	1.058	0.00183855	0.0027389
SPAC11E3.09	YES_32	1.1	1.09	9.32993e-07	1.88115e-06
SPAC13A11.04c	YES_32	0.892	0.897	2.23258e-26	3.89748e-25
SPAC16E8.08	YES_32	1	1.002	1.29672e-13	4.9233e-13
SPCC1840.02c	YES_32	1.042	1.047	0.724822	0.754353
SPAC13D6.03c	YES_32	1.04	1.033	0.467185	0.506397
SPAC1B9.02c	YES_32	1.005	1.005	1.32058e-13	5.00842e-13
SPAC19D5.11c	YES_32	0.922	0.923	9.9437e-34	3.8814e-32
SPAC1610.03c	YES_32	1.061	1.06	0.00459084	0.00659305
SPAC23D3.10c	YES_32	1.021	1.023	9.86026e-06	1.82593e-05
SPAC23C4.17	YES_32	1.055	1.048	0.12622	0.151884
SPCC794.11c	YES_32	0.873	0.855	2.56498e-26	4.43321e-25
SPAC1782.05	YES_32	1.071	1.064	0.000962007	0.00147811
SPAC343.16	YES_32	0.93	0.925	5.17111e-24	6.34785e-23
SPAC343.20	YES_32	1.042	1.041	0.68968	0.720153
SPAC10F6.14c	YES_32	1.015	1.012	2.10756e-06	4.12256e-06
SPAC17G6.13	YES_32	1.062	1.057	0.00255922	0.00377525
SPAC589.05c	YES_32	1.009	1.008	1.36241e-07	2.92885e-07
SPAC664.10	YES_32	1.017	1.002	0.000793277	0.00123139
SPAC1783.07c	YES_32	1.053	1.05	0.125241	0.150862
SPAC18G6.15	YES_32	0.928	0.938	8.46589e-21	7.01947e-20
SPAPB2C8.01	YES_32	1.001	1.002	4.32754e-14	1.71816e-13
SPAC8C9.19	YES_32	0.941	0.928	1.83059e-13	6.86027e-13
SPAC22H10.03c	YES_32	0.958	0.958	1.86115e-26	3.3328e-25
SPAC1B3.04c	YES_32	1.04	1.034	0.484778	0.523831
SPBC1604.02c	YES_32	0.86	0.863	1.44614e-25	2.22297e-24
SPAPB17E12.14c	YES_32	1.009	1.004	2.30028e-06	4.47684e-06
SPAC32A11.03c	YES_32	1.089	1.078	7.31524e-08	1.60538e-07
SPAC222.15	YES_32	1.045	1.043	0.910129	0.925041
SPBC1921.03c	YES_32	0.76	0.78	1.23815e-24	1.65436e-23
SPAC4G8.05	YES_32	0.91	0.931	1.45732e-16	7.31608e-16
SPAC1D4.01	YES_32	1.043	1.023	0.903611	0.919492
SPBC12D12.06	YES_32	0.654	0.684	1.88138e-13	7.02787e-13
SPAC56F8.06c	YES_32	1.015	1.018	0.000103092	0.000175045
SPAC2C4.15c	YES_32	0.896	0.931	4.902e-16	2.34244e-15
SPBC15D4.03	YES_32	0.967	0.965	5.80492e-19	3.78355e-18
SPAC664.01c	YES_32	0.88	0.884	3.32857e-38	2.82036e-36
SPAC3F10.05c	YES_32	1.013	1.014	1.94869e-07	4.14052e-07
SPBC16H5.05c	YES_32	1.036	1.037	0.201355	0.234263
SPAC6G9.05	YES_32	0.999	0.994	1.19898e-09	3.08995e-09
SPAC750.06c	YES_32	1.04	1.033	0.459196	0.498515
SPBC1734.12c	YES_32	0.819	0.837	2.36033e-21	2.10251e-20
SPAC824.08	YES_32	1.002	1.006	7.46872e-13	2.62084e-12
SPBC1347.09	YES_32	1.006	1.004	3.56499e-13	1.29412e-12
SPBC17G9.05	YES_32	1.024	1.027	0.00270738	0.00397693
SPAC922.03	YES_32	1.002	0.995	3.06383e-10	8.30893e-10
SPBC28F2.10c	YES_32	0.849	0.856	4.94376e-22	4.83151e-21
SPBC215.01	YES_32	1.005	1.001	6.69433e-07	1.3656e-06
SPAP14E8.04	YES_32	1.016	1.003	0.000895656	0.00138351
SPBC428.03c	YES_32	1.011	1.007	2.02897e-09	5.12255e-09
SPBC21C3.09c	YES_32	1.051	1.047	0.281774	0.317819
SPBC1105.11c	YES_32	1	1.002	1.96114e-07	4.16187e-07
SPBC691.04	YES_32	0.909	0.913	2.87964e-20	2.21815e-19
SPBC27B12.05	YES_32	1.019	1.02	2.66109e-05	4.76281e-05
SPBC2F12.11c	YES_32	0.957	0.962	7.38451e-12	2.34495e-11
SPBC1348.01	YES_32	1.045	1.039	0.964275	0.972808
SPAC6G10.02c	YES_32	0.945	0.951	1.98051e-30	5.50424e-29
SPBC32H8.08c	YES_32	1.04	1.03	0.536259	0.573926
SPBC16E9.15	YES_32	1.044	1.041	0.942933	0.954561
SPBC1105.05	YES_32	0.858	0.86	2.03781e-36	1.17153e-34
SPBC365.01	YES_32	1.017	1.01	6.7389e-05	0.000116299
SPBC21D10.08c	YES_32	1.029	1.025	0.00147354	0.00222763
SPBC1861.01c	YES_32	0.848	0.85	2.45276e-34	1.00246e-32
SPBC4C3.04c	YES_32	1.024	1.018	0.0047295	0.00678097
SPBC31F10.05	YES_32	1.009	1	1.07013e-08	2.51532e-08
SPBC30D10.10c	YES_32	0.915	0.934	1.78387e-25	2.65973e-24
SPBC646.13	YES_32	0.989	1.018	0.00206283	0.00306251
SPBC577.04	YES_32	0.92	0.918	6.30057e-13	2.22894e-12
SPBC691.05c	YES_32	1.017	1.009	8.36671e-07	1.68988e-06
SPBC83.17	YES_32	0.944	0.946	2.29569e-29	5.61636e-28
SPBP8B7.22	YES_32	0.89	0.899	1.66241e-13	6.23672e-13
SPCC162.02c	YES_32	1.018	1.016	2.4041e-07	5.06786e-07
SPBP19A11.02c	YES_32	1.032	1.031	0.0238346	0.0314757
SPCC16C4.04	YES_32	0.988	0.989	8.13747e-11	2.35776e-10
SPCC622.16c	YES_32	0.995	0.994	4.08241e-09	9.9805e-09
SPBPB2B2.11	YES_32	1.024	1.018	0.00142057	0.00214942
SPAC1071.08	YES_32	0.858	0.866	6.41353e-26	1.03631e-24
SPAC1039.03	YES_32	1.016	1.008	1.4926e-05	2.72195e-05
SPAC22G7.06c	YES_32	0.922	0.928	5.60838e-13	1.99422e-12
SPBC2G2.02	YES_32	1.06	1.058	0.0469409	0.0595808
SPCC24B10.20	YES_32	1.044	1.04	0.949211	0.959988
SPAC23E2.01	YES_32	0.952	0.954	1.33971e-21	1.22801e-20
SPBC3E7.16c	YES_32	1.009	1	0.000113263	0.000191658
SPCC965.05c	YES_32	1.045	1.047	0.815463	0.842379
SPAC26A3.10	YES_32	1.035	1.031	0.0721264	0.0899702
SPBC839.15c	YES_32	0.971	0.978	1.30887e-17	7.47862e-17
SPAC18B11.02c	YES_32	1.038	1.034	0.250293	0.285027
SPAC29A4.02c	YES_32	1.016	1.01	0.000310274	0.000502046
SPCC1259.11c	YES_32	1.035	1.027	0.262867	0.297945
SPAC227.06	YES_32	1.035	1.028	0.216871	0.250385
SPAC2H10.01	YES_32	1.012	1.018	0.000219482	0.000361024
SPCC1795.09	YES_32	1.056	1.059	0.0641308	0.0802848
SPAC4H3.04c	YES_32	1.07	1.068	7.88823e-05	0.000135127
SPAC328.10c	YES_32	0.718	0.74	6.00739e-23	6.60432e-22
SPCC584.01c	YES_32	0.965	0.972	1.71692e-17	9.71429e-17
SPAC890.05	YES_32	0.862	0.891	4.7921e-17	2.55726e-16
SPAC3F10.02c	YES_32	0.988	0.992	1.90562e-14	7.80676e-14
SPAC11G7.01	YES_32	1.026	1.029	0.0011384	0.00174068
SPBC12C2.07c	YES_32	0.907	0.911	1.93667e-20	1.53257e-19
SPAC3H5.12c	YES_32	0.862	0.875	2.99385e-25	4.40705e-24
SPAC1687.13c	YES_32	1.082	1.088	1.20578e-08	2.8208e-08
SPBC18H10.20c	YES_32	1.051	1.045	0.235761	0.270129
SPAC13G7.03	YES_32	1.142	1.134	1.105e-10	3.15429e-10
SPAC13A11.06	YES_32	1.051	1.054	0.158987	0.188185
SPAC16E8.18	YES_32	1.028	1.019	0.00417651	0.00603042
SPAC1F7.01c	YES_32	0.531	0.534	5.99069e-19	3.89003e-18
SPAC1D4.11c	YES_32	1.04	1.033	0.422152	0.462053
SPCC569.07	YES_32	1.026	1.018	2.75112e-05	4.91636e-05
SPAC1635.01	YES_32	1.033	1.032	0.00685371	0.00966698
SPAC25B8.10	YES_32	1.032	1.022	0.022585	0.0299353
SPCC895.05	YES_32	0.485	0.488	3.98591e-54	1.3847e-51
SPAC1782.06c	YES_32	0.999	1.013	7.23474e-06	1.35054e-05
SPAC3C7.01c	YES_32	0.992	0.999	1.97455e-12	6.67275e-12
SPAC3A12.08	YES_32	1.022	1.012	0.00011299	0.000191291
SPAC11D3.14c	YES_32	1.03	1.026	0.0106449	0.014745
SPAC17G8.07	YES_32	1.078	1.068	5.43814e-07	1.1159e-06
SPAC5H10.10	YES_32	1.02	1.024	1.44351e-05	2.63518e-05
SPAC683.03	YES_32	1.069	1.064	0.00128051	0.00194767
SPAC1786.02	YES_32	1.033	1.034	0.0250663	0.0330099
SPAC1952.07	YES_32	0.939	0.942	3.05978e-19	2.06002e-18
SPAPYUG7.02c	YES_32	0.948	0.953	3.71799e-17	2.01189e-16
SPAC8E11.04c	YES_32	1.036	1.037	0.134806	0.161321
SPAC24H6.03	YES_32	0.996	0.994	6.24606e-11	1.82496e-10
SPAC1B3.05	YES_32	1.04	1.04	0.452833	0.492222
SPBC1683.04	YES_32	1.018	1.018	1.61796e-05	2.9382e-05
SPAPB18E9.01	YES_32	0.899	0.897	2.41204e-20	1.87041e-19
SPAC3A11.06	YES_32	1.045	1.047	0.838055	0.862638
SPAC227.03c	YES_32	1.08	1.074	2.34367e-07	4.94648e-07
SPAC4G8.08	YES_32	1.016	1.018	2.78625e-06	5.37449e-06
SPBC1347.03	YES_32	1.061	1.058	0.0154723	0.02098
SPAC56F8.09	YES_32	0.883	0.904	5.93851e-18	3.52656e-17
SPAC2E12.03c	YES_32	1.037	1.037	0.207025	0.240296
SPBC15D4.15	YES_32	0.905	0.932	1.74258e-19	1.21074e-18
SPAC664.02c	YES_32	0.914	0.904	4.59996e-23	5.10551e-22
SPAC3G6.03c	YES_32	1.019	1.007	4.88602e-06	9.23505e-06
SPBC16H5.08c	YES_32	0.85	0.923	1.5819e-13	5.94753e-13
SPAC7D4.02c	YES_32	1.003	1.003	4.6938e-10	1.25144e-09
SPAC8C9.04	YES_32	1.042	1.035	0.727134	0.756307
SPBC1734.13	YES_32	0.844	0.862	2.34171e-21	2.09128e-20
SPAC869.04	YES_32	1.003	1.002	4.7671e-12	1.5521e-11
SPBC14C8.03	YES_32	0.958	0.958	1.23706e-21	1.13993e-20
SPBC17G9.12c	YES_32	1.042	1.042	0.77383	0.801516
SPAC926.07c	YES_32	1.01	1.006	2.43661e-08	5.54704e-08
SPBC29B5.04c	YES_32	0.995	0.998	8.86557e-23	9.53529e-22
SPBC215.05	YES_32	0.899	0.899	1.14147e-18	7.23282e-18
SPAP32A8.03c	YES_32	1.003	1.007	3.33375e-09	8.22545e-09
SPBC428.08c	YES_32	0.804	0.817	1.27455e-36	7.76804e-35
SPBC115.02c	YES_32	0.984	0.985	1.78606e-16	8.81359e-16
SPBC6B1.06c	YES_32	0.805	0.838	5.98527e-22	5.77579e-21
SPBC28F2.08c	YES_32	1.018	1.008	0.00031166	0.000503584
SPBC30B4.02c	YES_32	1.011	1	1.48279e-06	2.94019e-06
SPBC1348.14c	YES_32	1.049	1.038	0.532401	0.570324
SPBC32H8.11	YES_32	1.01	1.008	1.38875e-09	3.56053e-09
SPBC1703.08c	YES_32	1.018	1.012	6.90694e-08	1.52058e-07
SPBC1198.06c	YES_32	0.975	0.974	6.40553e-22	6.14719e-21
SPBC365.10	YES_32	0.941	0.948	2.41103e-14	9.78493e-14
SPBC23E6.05	YES_32	1.011	1.007	5.02237e-07	1.03425e-06
SPBC1921.05	YES_32	0.989	0.982	1.04379e-10	2.98939e-10
SPBC4F6.12	YES_32	0.82	0.833	7.08158e-27	1.31558e-25
SPBC32F12.08c	YES_32	0.85	0.844	1.03709e-20	8.49731e-20
SPBC31E1.01c	YES_32	1.026	1.025	0.00529915	0.00756027
SPBC83.04	YES_32	1.006	1.01	2.75795e-07	5.79269e-07
SPBC800.03	YES_32	1.033	1.028	0.217538	0.251072
SPBC839.07	YES_32	1.036	1.039	0.126733	0.152343
SPBP8B7.26	YES_32	1.034	1.028	0.056588	0.0713305
SPCC1827.07c	YES_32	1.01	1.006	8.8927e-07	1.79508e-06
SPBP22H7.05c	YES_32	1.021	1.018	3.7057e-06	7.06177e-06
SPCC16C4.11	YES_32	0.989	0.986	9.78152e-07	1.96877e-06
SPCC63.02c	YES_32	1.063	1.055	0.00148189	0.00223733
SPBPB2B2.12c	YES_32	1.027	1.022	0.0159131	0.0215189
SPAC10F6.04	YES_32	1.01	1.008	1.43747e-08	3.33363e-08
SPAC1039.09	YES_32	0.977	0.984	3.65798e-21	3.20904e-20
SPAC22G7.08	YES_32	0.986	0.99	1.98618e-11	6.05262e-11
SPBC2G2.06c	YES_32	1.002	0.998	3.23975e-05	5.73645e-05
SPCC306.08c	YES_32	1.012	1.007	1.17044e-05	2.15823e-05
SPAC23G3.02c	YES_32	1.006	1.008	9.35685e-09	2.20827e-08
SPBC428.14	YES_32	1.026	1.019	0.00423039	0.00610315
SPAC1071.11	YES_32	0.908	0.92	1.14264e-15	5.24376e-15
SPAC26A3.16	YES_32	1.039	1.036	0.398058	0.437474
SPBC8E4.03	YES_32	1.053	1.048	0.170179	0.200633
SPAC1952.06c	YES_32	1.031	1.023	0.0414225	0.0530024
SPAC29A4.13	YES_32	1.026	1.026	0.00959778	0.0133692
SPCC126.04c	YES_32	0.913	0.935	2.06412e-13	7.69395e-13
SPAC23H3.05c	YES_32	0.948	0.94	6.85536e-18	4.03653e-17
SPAC30.02c	YES_32	0.926	0.909	4.06848e-18	2.45807e-17
SPCC18.02	YES_32	1.01	1.012	1.15082e-05	2.1243e-05
SPAC521.03	YES_32	1.008	1.003	8.23164e-07	1.66454e-06
SPAC343.04c	YES_32	0.958	0.964	1.04032e-09	2.69505e-09
SPCC584.13	YES_32	1.021	1.025	0.00241676	0.00357118
SPAC922.05c	YES_32	1.006	1	2.23187e-08	5.101e-08
SPAC3F10.06c	YES_32	1.001	0.999	1.65945e-14	6.83858e-14
SPAC1296.03c	YES_32	1.032	1.028	0.0312853	0.0405693
SPAC3H8.03	YES_32	1.015	1.015	0.000139956	0.000234996
SPAC16E8.13	YES_32	1.025	1.026	0.0266326	0.0348744
SPBC19C7.08c	YES_32	1.05	1.042	0.503572	0.543295
SPAC13G7.07	YES_32	0.908	0.913	4.95111e-22	4.83151e-21
SPCC1259.03	YES_32	0.545	0.6	3.26594e-32	1.12336e-30
SPAC11H11.04	YES_32	1.079	1.076	0.000187899	0.000310838
SPAC13G6.10c	YES_32	0.711	0.722	1.15513e-35	5.652e-34
SPAC1751.04	YES_32	1.015	1.009	1.40704e-05	2.57537e-05
SPCC24B10.03	YES_32	1.065	1.062	0.00070369	0.0010992
SPAC144.02	YES_32	0.978	0.993	3.73943e-08	8.40284e-08
SPAC1F7.09c	YES_32	1.113	1.1	3.07519e-10	8.33323e-10
SPAC1F8.08	YES_32	1.01	1.011	4.57578e-09	1.1124e-08
SPCC61.05	YES_32	1.034	1.026	0.0722919	0.0901189
SPAC167.01	YES_32	1.048	1.036	0.583714	0.61975
SPAC23G3.07c	YES_32	1.011	1.004	3.68872e-06	7.03326e-06
SPAC25G10.06	YES_32	0.812	0.82	1.09442e-29	2.79559e-28
SPCC895.09c	YES_32	1.075	1.067	1.61608e-05	2.93634e-05
SPAC17A2.05	YES_32	1.042	1.056	0.893564	0.91194
SPAC3F10.13	YES_32	1.089	1.088	5.17833e-10	1.37325e-09
SPAC11E3.14	YES_32	1.028	1.029	0.00133397	0.00202456
SPAC17H9.08	YES_32	0.917	0.929	1.75694e-14	7.22323e-14
SPAC631.02	YES_32	0.854	0.857	1.40191e-38	1.31628e-36
SPAC694.03	YES_32	0.985	0.981	2.39242e-16	1.16241e-15
SPAC17H9.01	YES_32	1.028	1.031	0.0099891	0.0138698
SPAC1952.16	YES_32	1.045	1.039	0.867926	0.889946
SPBC106.11c	YES_32	1.015	1.02	3.99609e-05	7.01487e-05
SPAC8E11.07c	YES_32	0.871	0.88	7.78071e-19	4.98712e-18
SPAC26A3.09c	YES_32	1.163	1.156	1.20927e-16	6.15079e-16
SPBC1683.12	YES_32	1.048	1.049	0.576395	0.612728
SPAPB18E9.04c	YES_32	1.028	1.026	0.00576151	0.00818295
SPAC3C7.08c	YES_32	0.955	0.949	1.86739e-13	6.9831e-13
SPAC227.10	YES_32	1.106	1.101	9.36704e-06	1.73831e-05
SPAC4G9.02	YES_32	0.999	0.996	2.64949e-09	6.62183e-09
SPAC227.07c	YES_32	1.044	1.043	0.999598	1
SPBC1347.12	YES_32	1.057	1.04	0.127141	0.15278
SPAC57A10.03	YES_32	1.03	1.031	0.00695018	0.00979908
SPAC2F3.05c	YES_32	1.044	1.038	0.999417	1
SPBC1604.08c	YES_32	0.939	0.946	8.79653e-19	5.61749e-18
SPAC688.14	YES_32	1	1.01	9.10551e-09	2.15334e-08
SPAC3G6.06c	YES_32	0.848	0.86	1.58939e-20	1.27813e-19
SPBC16H5.11c	YES_32	0.955	0.948	2.68878e-19	1.82438e-18
SPAC7D4.12c	YES_32	0.934	0.937	6.91603e-23	7.48482e-22
SPAC8E11.05c	YES_32	0.854	0.847	8.29958e-35	3.74451e-33
SPBC1773.03c	YES_32	1.053	1.048	0.104815	0.127675
SPAC869.05c	YES_32	0.995	0.996	3.2324e-13	1.18079e-12
SPBC14C8.05c	YES_32	1.014	1.011	2.05093e-07	4.34448e-07
SPBC1861.03	YES_32	0.957	0.954	1.05251e-21	9.80269e-21
SPAC926.09c	YES_32	0.995	0.994	2.32765e-16	1.13412e-15
SPBC2D10.17	YES_32	1.006	0.995	8.08218e-06	1.5055e-05
SPBC215.06c	YES_32	1.008	1.015	2.09545e-08	4.79867e-08
SPAPB1A10.03	YES_32	0.917	0.92	1.67906e-29	4.19644e-28
SPBC428.11	YES_32	0.961	0.954	7.76008e-24	9.29604e-23
SPBC21D10.09c	YES_32	0.949	0.952	2.60938e-24	3.39512e-23
SPBC119.06	YES_32	1.014	1.018	2.05194e-05	3.69925e-05
SPBC9B6.11c	YES_32	0.921	0.927	4.70302e-22	4.62841e-21
SPBC29A10.09c	YES_32	1.094	1.078	0.000679099	0.00106222
SPBC30B4.03c	YES_32	0.934	0.938	5.34807e-18	3.18137e-17
SPBC14C8.04	YES_32	1.044	1.034	0.969165	0.9765
SPAC6G9.10c	YES_32	0.86	0.862	1.60304e-25	2.42128e-24
SPBC32H8.13c	YES_32	1.035	1.022	0.225068	0.258902
SPBC1703.11	YES_32	1.032	1.03	0.0144869	0.0197518
SPBC146.06c	YES_32	1	0.996	3.37895e-11	1.00933e-10
SPBC36B7.08c	YES_32	0.911	0.923	1.35767e-26	2.4694e-25
SPBC23G7.15c	YES_32	0.953	0.956	2.13179e-20	1.66424e-19
SPBC215.08c	YES_32	0.892	0.899	4.61987e-26	7.79099e-25
SPBC543.02c	YES_32	1.023	1.026	0.000366132	0.000588862
SPBC32H8.05	YES_32	1.037	1.034	0.131505	0.157751
SPBC31E1.02c	YES_32	0.945	0.938	7.16581e-19	4.61856e-18
SPBC660.10	YES_32	0.943	0.958	2.17177e-12	7.29665e-12
SPBC83.19c	YES_32	1.029	1.027	0.0222942	0.0296063
SPBC887.04c	YES_32	0.924	0.932	2.18649e-20	1.70311e-19
SPBC887.10	YES_32	1.04	1.035	0.854265	0.877244
SPBP8B7.31	YES_32	1.044	1.036	0.960248	0.969457
SPCC1840.05c	YES_32	0.998	0.992	2.41845e-09	6.07498e-09
SPBP35G2.06c	YES_32	1.016	1.01	3.75186e-06	7.14582e-06
SPCC24B10.17	YES_32	0.998	0.994	1.28976e-11	4.00772e-11
SPBPJ4664.03	YES_32	1.045	1.044	0.901385	0.917764
SPAC10F6.06	YES_32	1.067	1.063	0.0123926	0.0170367
SPAC1071.03c	YES_32	1.065	1.038	0.0957638	0.117556
SPAC22H10.04	YES_32	1.02	1.012	0.000564696	0.000889282
SPBC2G5.04c	YES_32	1.028	1.027	0.0426168	0.0544905
SPAC23G3.05c	YES_32	1.048	1.04	0.596109	0.631937
SPBC4C3.06	YES_32	1.058	1.048	0.047744	0.0605338
SPAC10F6.05c	YES_32	0.964	0.976	8.25871e-13	2.8893e-12
SPAC26F1.02	YES_32	1.05	1.048	0.23561	0.270045
SPBP35G2.08c	YES_32	0.944	0.968	1.87716e-06	3.6885e-06
SPAC19A8.02	YES_32	1.031	1.026	0.0148895	0.0202529
SPAC2C4.14c	YES_32	0.994	0.994	4.67775e-13	1.68225e-12
SPCC126.09	YES_32	0.958	0.976	3.21653e-09	7.94753e-09
SPAC24B11.06c	YES_32	1.028	1.026	0.0152643	0.0207384
SPAC30.03c	YES_32	1.023	1.022	0.000134449	0.000225968
SPCC18.17c	YES_32	0.781	0.828	5.40056e-16	2.56656e-15
SPAC56F8.05c	YES_32	1.026	1.023	0.00308771	0.00451271
SPAC343.07	YES_32	1.04	1.039	0.563862	0.600324
SPCC737.04	YES_32	1.074	1.066	0.000169958	0.000283045
SPAC9G1.07	YES_32	1.008	1.01	2.25046e-06	4.38726e-06
SPAC12G12.09	YES_32	1.037	1.034	0.283655	0.319525
SPBC15D4.09c	YES_32	0.993	0.996	4.72515e-05	8.23641e-05
SPAC3H8.07c	YES_32	0.906	0.89	1.76523e-17	9.90696e-17
SPAC17A2.02c	YES_32	0.999	1	2.38505e-06	4.63404e-06
SPBC19C7.12c	YES_32	1.024	1.02	0.0166518	0.0224219
SPAC13G7.11	YES_32	1.014	1.007	2.98422e-06	5.74042e-06
SPCC126.06	YES_32	1.029	1.024	0.0223807	0.0297098
SPAC1250.05	YES_32	1.024	1.015	0.0943973	0.116002
SPAC1782.04	YES_32	1.017	1.026	0.000361972	0.000582441
SPCC24B10.13	YES_32	1.028	1.027	0.0225004	0.0298459
SPAC144.05	YES_32	1.023	1.023	0.00114724	0.00175342
SPAC20G4.03c	YES_32	1.02	1.025	3.96107e-05	6.96043e-05
SPAC212.03	YES_32	1.009	1.009	2.77406e-05	4.95226e-05
SPCC613.02	YES_32	0.995	1	9.68066e-14	3.72432e-13
SPAC167.07c	YES_32	1.007	1.002	5.10777e-08	1.13238e-07
SPAC23H3.13c	YES_32	0.596	0.602	3.09466e-54	1.19454e-51
SPAC27E2.01	YES_32	0.939	0.95	1.46574e-12	5.01672e-12
SPCC965.06	YES_32	1.041	1.04	0.54086	0.578493
SPAC17A2.06c	YES_32	0.97	0.988	1.38163e-06	2.74745e-06
SPAC3G9.05	YES_32	1.026	1.024	0.000699944	0.00109384
SPAC3G6.13c	YES_32	1.016	1.01	3.44015e-05	6.0727e-05
SPAC12B10.16c	YES_32	1.04	1.038	0.515113	0.554119
SPAC17H9.11	YES_32	1.05	1.039	0.374525	0.414231
SPAC637.13c	YES_32	1.014	1.006	2.22047e-06	4.33366e-06
SPAC6B12.06c	YES_32	1.031	1.034	0.00802699	0.011267
SPAC17H9.06c	YES_32	1.038	1.047	0.483278	0.522373
SPAC19A8.03	YES_32	1.014	1.014	0.000580634	0.000913139
SPBC106.19	YES_32	0.923	0.931	5.55719e-20	4.14285e-19
SPACUNK4.19	YES_32	1.05	1.04	0.395511	0.435363
SPAC26F1.01	YES_32	1.039	1.038	0.362998	0.402636
SPAC1F3.05	YES_32	1.051	1.057	0.298198	0.335255
SPBC1685.15c	YES_32	0.972	0.98	4.19937e-16	2.015e-15
SPAPB1E7.07	YES_32	0.974	0.97	2.40386e-18	1.49125e-17
SPAC3C7.13c	YES_32	1.022	1.022	0.00100759	0.00154746
SPAC22A12.14c	YES_32	1.062	1.063	0.0115138	0.0158978
SPBC21C3.02c	YES_32	0.929	0.923	3.18941e-19	2.139e-18
SPAC4G9.14	YES_32	0.965	0.961	3.39045e-17	1.83751e-16
SPAC22H12.01c	YES_32	1.015	1.01	0.000186633	0.000309038
SPBC13E7.09	YES_32	1.019	1.021	0.0141292	0.0193095
SPAC57A7.05	YES_32	0.983	0.978	7.29038e-09	1.74187e-08
SPAC2G11.07c	YES_32	0.973	0.972	2.49919e-13	9.24621e-13
SPBC1683.13c	YES_32	0.999	1.006	6.77496e-07	1.38042e-06
SPAC694.02	YES_32	0.951	0.966	1.32957e-16	6.71355e-16
SPAC3H1.07	YES_32	1.002	0.996	7.44547e-10	1.95359e-09
SPBC16H5.13	YES_32	1.003	1.01	1.31992e-05	2.42358e-05
SPAC806.08c	YES_32	0.997	0.998	5.62578e-12	1.81804e-11
SPAC8E11.10	YES_32	1.023	1.022	1.43308e-05	2.61913e-05
SPBC1773.16c	YES_32	1.035	1.034	0.107207	0.130359
SPAC890.03	YES_32	1.034	1.04	0.104997	0.127851
SPBC14F5.03c	YES_32	1.012	1.01	2.49309e-08	5.6719e-08
SPBC18H10.05	YES_32	1.037	1.034	0.23528	0.269845
SPAC977.15	YES_32	1.002	1.005	2.56292e-10	6.99417e-10
SPBC30D10.13c	YES_32	1.034	1.018	0.244481	0.27966
SPBC215.07c	YES_32	1.046	1.047	0.733419	0.761476
SPAPB1A11.04c	YES_32	0.967	0.966	2.64766e-18	1.63374e-17
SPBC428.17c	YES_32	0.995	0.993	5.65277e-11	1.6614e-10
SPBC21H7.04	YES_32	0.923	0.926	1.94664e-16	9.56524e-16
SPBC119.12	YES_32	0.724	0.751	2.40611e-27	4.72251e-26
SPBP22H7.04	YES_32	0.981	0.98	7.10066e-17	3.68175e-16
SPBC29A10.14	YES_32	1.02	1.022	0.0010279	0.00157795
SPBC30B4.06c	YES_32	0.932	0.932	3.1449e-12	1.04151e-11
SPBC1539.06	YES_32	0.744	0.861	1.0663e-11	3.34324e-11
SPAC821.03c	YES_32	1.004	1.006	9.75913e-07	1.9654e-06
SPBC336.03	YES_32	0.709	0.705	5.47727e-36	2.92527e-34
SPBC1709.18	YES_32	0.968	0.975	2.16297e-12	7.28117e-12
SPBC146.13c	YES_32	0.71	0.686	5.84093e-24	7.11978e-23
SPBC3E7.05c	YES_32	1.014	1.002	0.0016365	0.00245688
SPBC23G7.16	YES_32	0.969	0.949	1.06484e-09	2.75448e-09
SPBC215.13	YES_32	0.99	0.992	4.39973e-22	4.35461e-21
SPBC543.05c	YES_32	1.009	1.01	6.73667e-06	1.26027e-05
SPBC337.09	YES_32	0.709	0.728	7.03335e-21	5.95948e-20
SPBC354.09c	YES_32	1.035	1.028	0.19412	0.226528
SPBC660.12c	YES_32	1.027	1.024	0.022481	0.0298315
SPBC839.14c	YES_32	1.022	1.019	3.6107e-05	6.36406e-05
SPBC8D2.01	YES_32	0.952	0.998	4.94623e-08	1.10008e-07
SPBPB2B2.02	YES_32	1.027	1.024	0.00732156	0.0103018
SPCC188.08c	YES_32	1.002	1	5.21504e-07	1.07236e-06
SPBP35G2.10	YES_32	1.035	1.034	0.130114	0.156191
SPCC24B10.18	YES_32	0.951	0.963	1.05696e-16	5.41575e-16
SPCC663.15c	YES_32	1.026	1.027	0.00148074	0.00223656
SPCC1020.12c	YES_32	1.012	1.014	3.89753e-05	6.85224e-05
SPAC10F6.16	YES_32	1.054	1.05	0.24478	0.279909
SPAC1093.03	YES_32	0.959	0.956	2.62422e-19	1.78406e-18
SPAC22H10.07	YES_32	0.738	0.728	1.1842e-33	4.52077e-32
SPAC23G3.08c	YES_32	1.037	1.023	0.607187	0.642708
SPBC530.08	YES_32	1.088	1.084	0.000531387	0.000840255
SPAC10F6.15	YES_32	1.055	1.043	0.126065	0.151749
SPAC26F1.08c	YES_32	1.048	1.035	0.630426	0.66515
SPBP4G3.02	YES_32	1.046	1.028	0.854933	0.87767
SPAC1B3.03c	YES_32	0.935	0.936	1.89859e-18	1.18842e-17
SPAC2C4.17c	YES_32	1.02	1.014	0.000288942	0.000468839
SPCC1322.02	YES_32	1.06	1.055	0.0166813	0.0224442
SPAC24B11.13	YES_32	0.901	0.896	1.64496e-25	2.47385e-24
SPAC30.04c	YES_32	1.015	1.02	6.10299e-05	0.000105587
SPCC1827.02c	YES_32	1.004	1.004	4.37287e-08	9.78194e-08
SPAC589.03c	YES_32	1.026	1.015	0.00341895	0.00497589
SPAC343.11c	YES_32	0.987	0.97	3.32436e-10	8.99441e-10
SPCC74.02c	YES_32	0.984	0.992	4.71224e-11	1.39322e-10
SPAC9G1.08c	YES_32	0.982	0.988	4.43239e-17	2.37259e-16
SPAC3G6.11	YES_32	1.027	1.036	0.0197179	0.0263462
SPAC13F5.04c	YES_32	1.07	1.065	0.00102996	0.00158043
SPBC1604.07	YES_32	0.445	0.448	8.80179e-16	4.09336e-15
SPAC4A8.05c	YES_32	0.782	0.789	2.47217e-24	3.2287e-23
SPAC17A2.13c	YES_32	1.067	1.061	0.0312642	0.0405571
SPBC20F10.07	YES_32	1.016	1.009	0.000272021	0.000442623
SPAC1420.03	YES_32	1.096	1.084	5.17693e-08	1.14698e-07
SPCC132.02	YES_32	0.974	0.988	7.46606e-07	1.51502e-06
SPAC12B10.07	YES_32	0.927	0.93	6.27486e-13	2.22437e-12
SPAC144.17c	YES_32	1.024	1.019	0.0451394	0.0574833
SPCC320.03	YES_32	1.014	1.008	0.00172048	0.00257739
SPAC1486.04c	YES_32	0.975	0.985	4.53851e-10	1.21376e-09
SPAC20G8.04c	YES_32	1.036	1.034	0.26623	0.301363
SPAC227.14	YES_32	1.023	1.022	0.00250676	0.00370258
SPCC63.04	YES_32	1.034	1.026	0.0977559	0.119705
SPAC1687.05	YES_32	0.903	0.917	2.41479e-17	1.33583e-16
SPAC25A8.02	YES_32	1.028	1.027	0.0064144	0.00906945
SPAC27F1.10	YES_32	1.033	1.035	0.0834488	0.103131
SPCC965.11c	YES_32	1.068	1.066	0.000468828	0.000744382
SPAC17A2.12	YES_32	1.028	1.027	0.0374902	0.048166
SPAC3H5.04	YES_32	0.996	1.001	2.61286e-10	7.12487e-10
SPAC139.01c	YES_32	1.003	1.004	6.21939e-05	0.000107547
SPAC17H9.14c	YES_32	1.046	1.049	0.879832	0.90004
SPAC6G10.03c	YES_32	1.007	1.002	1.31656e-08	3.06344e-08
SPAC6B12.15	YES_32	0.784	0.83	4.14593e-15	1.80262e-14
SPAC17H9.10c	YES_32	0.949	0.942	7.84097e-09	1.86956e-08
SPAC19A8.04	YES_32	1.002	1.007	2.08677e-06	4.08419e-06
SPBC11B10.07c	YES_32	0.979	0.983	5.44874e-07	1.11729e-06
SPAP11E10.01	YES_32	1.031	1.027	0.048494	0.0614398
SPAC26F1.09	YES_32	1.025	1.014	0.00984308	0.0136834
SPAC1F3.06c	YES_32	1.094	1.066	0.0324199	0.0419623
SPBC16A3.19	YES_32	0.89	0.911	5.95925e-18	3.53284e-17
SPAPB21F2.03	YES_32	1.044	1.035	0.952832	0.96309
SPAC3G6.09c	YES_32	1.109	1.108	1.88115e-10	5.19898e-10
SPAC22E12.14c	YES_32	0.946	0.955	2.34681e-13	8.70099e-13
SPBC23G7.06c	YES_32	0.993	1.011	4.28952e-05	7.51099e-05
SPAC4G9.20c	YES_32	1.009	0.994	0.0886049	0.109076
SPAC23C11.04c	YES_32	0.846	0.895	1.1553e-10	3.279e-10
SPBC13E7.11	YES_32	0.948	0.975	3.25958e-06	6.24672e-06
SPAC30C2.02	YES_32	1.027	1.018	0.0801122	0.09929
SPBC1685.01	YES_32	0.953	0.944	4.06306e-14	1.62242e-13
SPAC694.06c	YES_32	0.901	0.924	1.6924e-14	6.96613e-14
SPAC3H1.11	YES_32	1.034	1.042	0.391863	0.43162
SPBC1703.04	YES_32	0.939	0.944	7.83125e-20	5.71549e-19
SPAC9E9.05	YES_32	1.034	1.038	0.167951	0.198186
SPBC1778.03c	YES_32	1.015	1.018	3.79707e-06	7.22795e-06
SPBC1683.03c	YES_32	1.061	1.056	0.0316025	0.0409653
SPAC9G1.02	YES_32	1.045	1.056	0.904404	0.920029
SPBC32F12.05c	YES_32	0.898	0.92	7.84277e-10	2.05319e-09
SPBC216.02	YES_32	1.026	1.023	0.026034	0.0341419
SPAPB24D3.01	YES_32	1	0.992	6.55714e-07	1.3384e-06
SPBC4F6.11c	YES_32	1.031	1.027	0.0994725	0.121593
SPBC23G7.11	YES_32	0.984	0.992	0.00265961	0.00391007
SPBC1198.07c	YES_32	1.008	0.995	0.00082994	0.001286
SPBP26C9.02c	YES_32	1.062	1.047	0.0255101	0.0335562
SPBC29A3.03c	YES_32	0.991	1.003	5.45138e-07	1.11729e-06
SPBC31F10.07	YES_32	0.977	1.003	2.06297e-05	3.71721e-05
SPBC1539.08	YES_32	0.729	0.785	4.72514e-18	2.82533e-17
SPAC926.06c	YES_32	0.927	0.94	6.02322e-21	5.14119e-20
SPBC336.14c	YES_32	0.839	0.843	1.30209e-16	6.58439e-16
SPBC1711.14	YES_32	1.039	1.034	0.52152	0.559876
SPBC15D4.07c	YES_32	1.001	1.002	1.20349e-06	2.40836e-06
SPBC3F6.01c	YES_32	1.042	1.026	0.830185	0.855753
SPBC24C6.05	YES_32	0.863	0.931	7.62611e-09	1.82083e-08
SPBC21C3.14c	YES_32	0.996	0.994	7.07616e-12	2.25528e-11
SPBC543.10	YES_32	1.044	1.022	0.978807	0.985045
SPBC337.16	YES_32	0.941	0.935	6.4489e-13	2.27909e-12
SPBC354.10	YES_32	1.009	1.003	1.17503e-05	2.16555e-05
SPBC685.06	YES_32	0.772	0.816	1.00198e-15	4.63501e-15
SPBC887.08	YES_32	1.03	1.03	0.0301741	0.0392015
SPBP8B7.07c	YES_32	1.02	1.016	0.000178932	0.000297137
SPBC8D2.19	YES_32	1.019	1.012	0.000185994	0.000308274
SPBPB7E8.02	YES_32	1.04	1.035	0.610936	0.646282
SPCC188.13c	YES_32	0.957	0.952	9.70863e-24	1.14331e-22
SPBP4H10.13	YES_32	0.96	0.964	3.34429e-18	2.03826e-17
SPCC31H12.03c	YES_32	1.034	1.037	0.402375	0.441938
SPCC737.03c	YES_32	0.941	0.938	4.79977e-17	2.55743e-16
SPCC1183.02	YES_32	1.072	1.052	0.177597	0.208577
SPAC1142.03c	YES_32	1.032	1.031	0.154774	0.183447
SPAC10F6.13c	YES_32	0.91	0.914	1.18203e-17	6.78741e-17
SPAC22H10.09	YES_32	0.952	0.954	6.40567e-08	1.41201e-07
SPBC30B4.04c	YES_32	1.037	1.052	0.727836	0.75681
SPCC4G3.15c	YES_32	0.934	0.95	2.2074e-14	8.99004e-14
SPAC23H3.03c	YES_32	0.908	0.917	1.66697e-11	5.11578e-11
SPBC56F2.11	YES_32	0.978	0.969	0.0754719	0.0938738
SPAC12G12.10	YES_32	1.043	1.033	0.905581	0.920957
SPAC26F1.10c	YES_32	0.869	0.867	1.57863e-19	1.10791e-18
SPAC2F3.02	YES_32	0.973	0.972	3.56466e-05	6.2861e-05
SPCC1442.16c	YES_32	1.123	1.088	0.000520064	0.000823474
SPAC26H5.07c	YES_32	1.062	1.036	0.133871	0.160368
SPAC30D11.01c	YES_32	1.027	1.023	0.103044	0.125693
SPCC188.09c	YES_32	1.102	1.092	3.48513e-06	6.65971e-06
SPAC589.07c	YES_32	1.065	1.06	0.0449812	0.0573237
SPAC343.18	YES_32	1.038	1.038	0.563814	0.600324
SPCC757.05c	YES_32	1.064	1.048	0.00834286	0.0116914
SPAC9G1.11c	YES_32	0.795	0.813	5.03464e-24	6.20224e-23
SPAC3G9.04	YES_32	0.911	0.958	1.22786e-06	2.45431e-06
SPAC13G7.04c	YES_32	0.995	1.01	0.00427019	0.00615545
SPBC1683.08	YES_32	1.021	1.019	0.00595397	0.00844248
SPAC4C5.01	YES_32	1.066	1.051	0.257032	0.292189
SPAC17A5.04c	YES_32	1.118	1.096	0.0012674	0.00192942
SPBC25B2.06c	YES_32	1.1	1.084	0.000252125	0.000411599
SPAC1486.01	YES_32	0.98	0.987	1.94604e-05	3.51929e-05
SPCC132.04c	YES_32	1.064	1.094	0.432707	0.472118
SPAC12B10.09	YES_32	0.958	0.983	9.17115e-05	0.000156563
SPAC1556.02c	YES_32	0.965	0.986	7.26479e-08	1.59531e-07
SPAC1786.04	YES_32	1.032	1.034	0.421324	0.461292
SPCC320.04c	YES_32	0.937	0.958	5.1602e-06	9.73739e-06
SPAC14C4.05c	YES_32	1.093	1.09	1.35846e-05	2.48908e-05
SPAC20G8.10c	YES_32	1.006	1.002	2.716e-05	4.85859e-05
SPAC22F3.07c	YES_32	0.977	0.973	2.93658e-09	7.29734e-09
SPCC645.13	YES_32	1.141	1.123	8.53992e-11	2.47231e-10
SPAC1687.06c	YES_32	1.08	1.068	0.00403284	0.00583025
SPAC25H1.07	YES_32	0.903	0.941	1.57401e-07	3.36499e-07
SPAC29A4.14c	YES_32	0.979	0.982	1.76112e-10	4.88279e-10
SPCC970.10c	YES_32	0.33	0.343	5.84101e-22	5.65228e-21
SPAC17A2.14	YES_32	1.072	1.051	0.0309235	0.0401301
SPAC4A8.03c	YES_32	0.947	0.956	1.65551e-07	3.53487e-07
SPAC4G9.06c	YES_32	1.071	1.06	0.025623	0.0336921
SPAC13G6.01c	YES_32	1.052	1.035	0.562598	0.59953
SPAC1805.02c	YES_32	1.082	1.062	0.00510938	0.00729851
SPAC7D4.03c	YES_32	1.042	1.023	0.883297	0.902787
SPAC6F6.09	YES_32	0.962	0.956	5.37409e-09	1.29921e-08
SPAC18G6.02c	YES_32	0.795	0.794	2.20906e-33	8.3416e-32
SPAC19A8.10	YES_32	1.034	1.026	0.136592	0.163178
SPBC11C11.11c	YES_32	0.998	1	8.62122e-09	2.04577e-08
SPAP27G11.16	YES_32	1.023	1.027	0.0122481	0.0168582
SPAC26H5.05	YES_32	0.837	0.867	1.6123e-11	4.96115e-11
SPAC1F7.11c	YES_32	1.035	1.049	0.643428	0.676534
SPBC16G5.07c	YES_32	1.005	1	9.49646e-05	0.000161799
SPAPB2B4.02	YES_32	0.896	0.92	8.66277e-14	3.34755e-13
SPAC3H1.12c	YES_32	1.037	1.036	0.581485	0.61795
SPAC22F3.03c	YES_32	1.093	1.088	2.23445e-06	4.35849e-06
SPAC4H3.07c	YES_32	0.847	0.855	4.3092e-15	1.87127e-14
SPBC13G1.10c	YES_32	0.855	0.888	6.57897e-14	2.56513e-13
SPAC589.09	YES_32	1.018	1.022	0.0065862	0.00930478
SPAC30D11.09	YES_32	0.927	0.925	4.16858e-24	5.24698e-23
SPBC16A3.17c	YES_32	1.043	1.046	0.891028	0.909886
SPAC3H8.02	YES_32	0.975	0.984	1.93755e-09	4.90601e-09
SPBC1703.06	YES_32	1.027	1.011	0.302057	0.339042
SPAC821.06	YES_32	0.955	0.962	1.81967e-20	1.45323e-19
SPAC9G1.12	YES_32	0.896	0.879	2.1837e-08	4.9942e-08
SPBC1778.09	YES_32	1.14	1.11	0.00320807	0.00467877
SPAC8C9.11	YES_32	0.936	0.937	9.1433e-28	1.84673e-26
SPBC16A3.03c	YES_32	0.969	0.937	0.0123915	0.0170367
SPBC19C7.02	YES_32	0.979	0.984	1.25539e-09	3.23293e-09
SPBC3B8.05	YES_32	0.953	0.95	5.14172e-15	2.21342e-14
SPBC216.04c	YES_32	1.063	1.055	0.00225651	0.00333721
SPAPB8E5.05	YES_32	1.019	1.016	2.24997e-05	4.04994e-05
SPBC530.14c	YES_32	0.885	0.888	2.81782e-32	9.7891e-31
SPBC25B2.03	YES_32	1.059	1.051	0.077018	0.0957282
SPBC1198.12	YES_32	1.028	1.024	0.00265725	0.00390824
SPCC1223.04c	YES_32	1.034	1.04	0.146121	0.174023
SPBC29A3.05	YES_32	0.935	0.948	3.1776e-13	1.162e-12
SPBC20F10.05	YES_32	1.008	1.021	0.00212091	0.00314739
SPAC869.06c	YES_32	1.069	1.058	0.0162027	0.0218425
SPCC622.14	YES_32	0.965	0.973	1.03241e-21	9.66734e-21
SPAC222.04c	YES_32	0.389	0.407	7.05234e-45	1.53124e-42
SPBC1861.06c	YES_32	1.019	1.01	1.16611e-05	2.15138e-05
SPAC26F1.12c	YES_32	1.004	1.002	0.000164187	0.000274091
SPBC3B8.04c	YES_32	0.927	0.935	1.53248e-21	1.39368e-20
SPBC36.06c	YES_32	0.976	0.973	2.90235e-11	8.72967e-11
SPBC2F12.15c	YES_32	1.015	1.001	0.00786017	0.0110462
SPBC1709.01	YES_32	1.003	1.003	1.4613e-07	3.13561e-07
SPBCPT2R1.01c	YES_32	1.077	1.046	0.250404	0.285027
SPCP31B10.04	YES_32	1.094	0.997	0.583635	0.61975
SPBC19C7.05	YES_32	1.115	1.047	0.271432	0.306952
SPCC162.12	YES_32	1.016	1.001	0.107624	0.13082
SPBC800.02	YES_32	1.004	1.002	3.49142e-10	9.42438e-10
SPBC365.11	YES_32	1.017	1.006	0.00551371	0.00785992
SPCC737.05	YES_32	1.009	1.002	4.58025e-08	1.02195e-07
SPAC3G9.03	YES_32	0.634	0.656	4.0403e-35	1.92274e-33
SPAC8F11.09c	YES_32	1.036	1.034	0.209042	0.242071
SPAC17G8.10c	YES_32	1.066	1.06	1.58384e-05	2.88077e-05
SPAC1805.01c	YES_32	0.977	0.978	4.78512e-09	1.16167e-08
SPAPB1A10.09	YES_32	0.976	0.978	2.10085e-12	7.07889e-12
SPAC23G3.10c	YES_32	0.923	0.928	7.96199e-18	4.66441e-17
SPBC16A3.13	YES_32	1.094	1.096	0.000382185	0.000613261
SPBC3E7.07c	YES_32	1.037	1.045	0.359107	0.398575
SPAC637.09	YES_32	0.726	0.619	1.29393e-14	5.35771e-14
SPCC1235.08c	YES_32	1.007	0.992	6.8812e-09	1.65092e-08
SPAC19G12.11	YES_32	0.955	0.949	7.95275e-22	7.54859e-21
SPBC13E7.04	YES_32	1	1.005	0.000741459	0.00115405
SPCC777.15	YES_32	1.041	1.021	0.806821	0.833948
SPAC521.05	YES_32	1.073	1.07	5.14162e-06	9.7076e-06
SPBC365.14c	YES_32	1.072	1.055	0.185262	0.21671
SPAC25B8.09	YES_32	1.07	1.042	0.292182	0.328811
SPAC57A10.07	YES_32	1.15	1.113	2.39939e-05	4.30773e-05
SPAC6G9.03c	YES_32	1.017	1.008	3.1322e-05	5.55487e-05
SPAC1F3.03	YES_32	1.002	0.999	6.6356e-06	1.24203e-05
SPAC630.07c	YES_32	1.009	0.998	2.40338e-06	4.66444e-06
SPBC18A7.01	YES_32	1.019	1.014	0.000254558	0.000415375
SPAC1071.04c	YES_32	0.698	0.69	4.97217e-26	8.30449e-25
SPCC126.10	YES_32	1.028	1.024	0.0320039	0.0414548
SPAC6F12.04	YES_32	1.039	1.042	0.63675	0.670731
SPAC24H6.13	YES_32	1.022	1.034	0.0292713	0.0380998
SPBC25B2.07c	YES_32	1.057	1.037	0.328309	0.366264
SPCC1020.11c	YES_32	0.981	1.015	0.00307949	0.00450259
SPAC6B12.09	YES_32	1.038	1.043	0.594746	0.630884
SPBC1861.09	YES_32	1.038	1.035	0.444502	0.484075
SPBC3B9.15c	YES_32	1.06	1.06	0.075884	0.0943525
SPCC777.02	YES_32	1.067	1.068	0.0202904	0.027059
SPBC1709.04c	YES_32	1.051	1.048	0.246697	0.281823
SPAC823.11	YES_32	0.825	0.825	1.41242e-34	6.29072e-33
SPBP4G3.03	YES_32	0.991	0.988	2.23948e-14	9.11003e-14
SPAC664.13	YES_32	1.047	1.035	0.687945	0.71899
SPBC342.01c	YES_32	0.894	0.944	2.73694e-10	7.44567e-10
SPAC23C4.03	YES_32	1.039	1.029	0.62426	0.659174
SPCC4F11.04c	YES_32	1.02	1.006	0.000318063	0.000513453
SPBC83.02c	YES_32	0.737	0.748	5.53219e-29	1.29857e-27
SPCC1281.07c	YES_32	1.081	1.085	0.000393501	0.000629095
SPCC4E9.01c	YES_32	1.069	1.069	0.000243966	0.000399593
SPCC757.09c	YES_32	0.797	0.793	3.667e-34	1.47027e-32
SPCC794.07	YES_32	1.031	1.03	0.168013	0.198192
SPCC70.10	YES_32	1.045	1.047	0.922334	0.93635
SPAC18G6.10	YES_32	1.004	1.002	0.00022674	0.00037208
SPAC13G6.08	YES_32	1.013	1.004	0.000170103	0.000283152
SPAC25B8.07c	YES_32	1.035	1.019	0.177827	0.208707
SPAC144.04c	YES_32	0.952	0.953	4.86308e-15	2.09867e-14
SPAC21E11.05c	YES_32	1.017	1.01	0.000292391	0.000473993
SPAC22A12.11	YES_32	0.98	0.988	2.4234e-05	4.3486e-05
SPAC4F10.11	YES_32	0.911	0.914	1.59309e-19	1.11581e-18
SPAC3H8.08c	YES_32	1.054	1.047	0.612881	0.648143
SPCC188.07	YES_32	0.418	0.423	1.22768e-28	2.73396e-27
SPAC3G9.07c	YES_32	0.931	0.926	1.84047e-15	8.28213e-15
SPBC557.05	YES_32	1.013	1.026	0.0097788	0.0136049
SPAC823.05c	YES_32	0.988	0.992	3.0397e-06	5.84389e-06
SPAC1F8.06	YES_32	0.977	0.982	1.08976e-08	2.55971e-08
SPAC13D6.01	YES_32	1.012	1.01	0.000202799	0.00033485
SPAC26A3.11	YES_32	1.015	1.016	0.00372237	0.00540615
SPBC31F10.15c	YES_32	1.03	1.034	0.0639997	0.0801495
SPAC22A12.03c	YES_32	1.027	1.023	0.0173479	0.023296
SPBC1289.06c	YES_32	1.033	1.024	0.319939	0.357385
SPCC645.07	YES_32	1.028	1.02	0.0176897	0.0237457
SPAC977.14c	YES_32	0.985	0.987	1.14263e-19	8.15094e-19
SPAP7G5.05	YES_32	0.827	0.849	2.30083e-25	3.41584e-24
SPBC83.16c	YES_32	1.003	0.997	2.97998e-09	7.39988e-09
SPCC777.09c	YES_32	0.989	0.991	2.38055e-11	7.19132e-11
SPAC13C5.04	YES_32	0.962	0.969	8.00441e-22	7.57693e-21
SPAC869.07c	YES_32	1.041	1.034	0.61648	0.651576
SPAC3H1.14	YES_32	0.974	0.973	7.04408e-26	1.1277e-24
SPBC216.05	YES_32	0.938	0.927	3.6109e-28	7.64894e-27
SPBC32F12.12c	YES_32	1.027	1.019	0.015479	0.0209809
SPCC1620.13	YES_32	1.002	0.988	2.50443e-09	6.26828e-09
SPBP4H10.10	YES_32	1.029	1.021	0.387915	0.427679
SPAC3G6.01	YES_32	0.998	0.987	0.00111117	0.00170203
SPCC757.03c	YES_32	0.934	0.954	8.32554e-08	1.80994e-07
SPBC29A10.16c	YES_32	0.88	0.889	2.89036e-23	3.3139e-22
SPAP32A8.02	YES_32	1.059	1.049	0.1055	0.128419
SPCP1E11.03	YES_32	1.078	1.069	0.00057707	0.000908356
SPAC31A2.14	YES_32	1.087	1.086	1.02125e-09	2.65159e-09
SPBC19C2.04c	YES_32	0.996	0.993	7.96387e-10	2.08332e-09
SPBC1711.04	YES_32	0.935	0.951	7.57765e-16	3.5526e-15
SPBC713.08	YES_32	0.893	0.889	2.934e-09	7.29614e-09
SPBC365.16	YES_32	0.995	1	1.32139e-07	2.84419e-07
SPBC215.14c	YES_32	1.012	1.01	1.9557e-07	4.15288e-07
SPBP23A10.14c	YES_32	0.98	0.986	9.30065e-15	3.92117e-14
SPAC7D4.13c	YES_32	0.91	0.915	6.82787e-30	1.78346e-28
SPBC4F6.08c	YES_32	0.998	0.99	3.73496e-12	1.22755e-11
SPCC1840.09	YES_32	0.951	0.97	3.87889e-09	9.50972e-09
SPBC4B4.03	YES_32	0.894	0.903	5.80739e-20	4.30168e-19
SPCC777.08c	YES_32	0.947	0.953	4.28463e-22	4.2528e-21
SPBC16H5.12c	YES_32	1.136	1.142	8.5641e-12	2.69734e-11
SPAC1834.10c	YES_32	1.053	1.039	0.325844	0.363748
SPBC25B2.02c	YES_32	1.046	1.034	0.847717	0.871293
SPBC1198.03c	YES_32	0.947	0.975	2.33135e-07	4.92348e-07
SPAC24C9.12c	YES_32	0.991	1.013	2.87657e-05	5.12735e-05
SPAC6G9.14	YES_32	0.978	0.981	1.88098e-10	5.19898e-10
SPBC16D10.11c	YES_32	0.989	0.988	1.07491e-11	3.36721e-11
SPAC25B8.13c	YES_32	1.084	1.08	7.80171e-05	0.000133777
SPAC869.01	YES_32	1.106	1.098	6.80298e-10	1.78636e-09
SPBC405.06	YES_32	1.052	1.047	0.185271	0.21671
SPAC57A10.10c	YES_32	1.029	1.021	0.0256828	0.0337579
SPBC2G2.13c	YES_32	0.615	0.65	1.34673e-28	2.97996e-27
SPCC1281.04	YES_32	1.038	1.031	0.25305	0.287945
SPBC3D6.08c	YES_32	0.99	0.988	6.11198e-07	1.24974e-06
SPCC794.10	YES_32	1.001	0.996	2.57569e-12	8.59554e-12
SPAC17C9.08	YES_32	1.004	1.001	8.55638e-10	2.23495e-09
SPAC25G10.05c	YES_32	0.98	0.981	4.02608e-05	7.06395e-05
SPAC3F10.04	YES_32	1.005	1.008	3.0443e-05	5.40691e-05
SPAC23H4.14	YES_32	1.059	1.049	0.0591729	0.0744268
SPAC7D4.05	YES_32	1.039	1.038	0.345612	0.38421
SPAC19G12.12	YES_32	1.045	1.042	0.902686	0.91882
SPBC1347.07	YES_32	1.036	1.026	0.153436	0.181923
SPBC1921.04c	YES_32	1.027	1.019	0.0262904	0.0344392
SPBC337.13c	YES_32	0.998	0.988	4.34304e-06	8.24465e-06
SPAC11E3.11c	YES_32	0.88	0.898	9.40214e-12	2.95593e-11
SPCC1393.10	YES_32	0.947	0.957	1.04184e-12	3.61575e-12
SPAC27D7.05c	YES_32	1.011	1.027	0.0177924	0.0238652
SPAC27D7.06	YES_32	1.052	1.047	0.185332	0.21671
SPBC25H2.03	YES_32	1.031	1.025	0.0722975	0.0901189
SPCC1919.07	YES_32	1.039	1.044	0.566039	0.602272
SPAC732.02c	YES_32	1.061	1.055	0.00805177	0.0112972
SPAC959.07	YES_32	0.824	0.852	7.78329e-23	8.39725e-22
SPBC18E5.08	YES_32	1.007	1.038	0.0169154	0.0227504
SPBC1734.09	YES_32	1.046	1.044	0.786914	0.814098
SPBP4H10.09	YES_32	0.933	0.946	1.63888e-13	6.15509e-13
SPAC959.08	YES_32	0.814	0.825	3.66187e-23	4.11992e-22
SPBC354.12	YES_32	1.069	1.067	0.000905086	0.00139745
SPCC338.06c	YES_32	1.058	1.05	0.0290629	0.0378854
SPCC548.05c	YES_32	1.042	1.039	0.73478	0.762661
SPCC126.03	YES_32	1.002	1.006	1.36236e-13	5.16123e-13
SPCC1450.03	YES_32	0.972	0.996	2.81109e-06	5.41638e-06
SPAC12B10.05	YES_32	1.06	1.054	0.00128688	0.00195651
SPCC757.11c	YES_32	1.043	1.039	0.758407	0.786245
SPAC11D3.04c	YES_32	1.065	1.063	4.18717e-05	7.33916e-05
SPCC737.06c	YES_32	1.017	1.023	3.73124e-07	7.75722e-07
SPBC1683.09c	YES_32	0.922	0.92	5.68955e-26	9.36754e-25
SPAC26A3.02	YES_32	1.036	1.035	0.22022	0.253999
SPAC14C4.06c	YES_32	0.807	0.833	3.28604e-17	1.7837e-16
SPAC1399.03	YES_32	1.063	1.062	0.000352009	0.000567461
SPAC22F8.02c	YES_32	0.766	0.772	1.1044e-26	2.0193e-25
SPBC119.14	YES_32	1.097	1.095	4.51191e-13	1.62597e-12
SPAC4F10.17	YES_32	1.077	1.078	3.13241e-05	5.55487e-05
SPCC550.07	YES_32	1.074	1.067	5.38341e-05	9.34631e-05
SPAC4A8.09c	YES_32	0.949	0.958	2.93225e-21	2.60527e-20
SPCC18B5.06	YES_32	0.899	0.927	2.33279e-13	8.65822e-13
SPAC922.04	YES_32	1.058	1.064	0.0808079	0.100081
SPAC644.07	YES_32	0.996	0.997	1.26995e-08	2.96293e-08
SPAC13D6.02c	YES_32	0.959	0.951	6.62725e-12	2.11609e-11
SPAC1952.03	YES_32	0.885	0.904	8.55763e-17	4.39781e-16
SPBC36B7.06c	YES_32	0.995	0.996	4.63619e-10	1.23703e-09
SPAC22E12.05c	YES_32	1.001	0.997	1.25391e-10	3.54153e-10
SPBC337.08c	YES_32	0.997	0.997	1.34125e-06	2.67481e-06
SPAC12G12.13c	YES_32	1.001	0.993	6.10816e-08	1.34814e-07
SPAPB1A10.10c	YES_32	0.98	0.982	1.41489e-20	1.1431e-19
SPAC9.13c	YES_32	0.965	0.975	3.35516e-15	1.47542e-14
SPAPB8E5.10	YES_32	1.026	1.024	0.00093698	0.00144221
SPBC902.05c	YES_32	1.004	1.005	4.97673e-12	1.61884e-11
SPAC24H6.11c	YES_32	1.015	1.014	2.25009e-08	5.1351e-08
SPCC965.09	YES_32	1.031	1.017	0.213402	0.246626
SPAC13D6.04c	YES_32	0.993	0.987	2.65816e-17	1.46346e-16
SPAPB24D3.09c	YES_32	1.027	1.022	0.000393387	0.000629095
SPAC8C9.09c	YES_32	1.018	1.012	7.79136e-05	0.000133665
SPAC3H8.04	YES_32	1.019	1.015	3.13516e-07	6.56117e-07
SPBC24C6.11	YES_32	0.772	0.745	2.13959e-24	2.8155e-23
SPCC1235.02	YES_32	1.021	1.018	1.60373e-05	2.91542e-05
SPCC1739.07	YES_32	0.337	0.369	8.18884e-36	4.064e-34
SPCC1223.01	YES_32	1.018	1.005	0.000259054	0.000421918
SPAC513.04	YES_32	0.993	0.995	7.95624e-12	2.5173e-11
SPCC965.12	YES_32	0.997	0.996	1.33763e-10	3.76269e-10
SPBC543.08	YES_32	1.045	1.042	0.951649	0.962173
SPBC2G2.03c	YES_32	0.924	0.952	2.22358e-10	6.10649e-10
SPAPB24D3.02c	YES_32	0.984	0.991	6.96927e-13	2.44954e-12
SPAC13C5.02	YES_32	0.206	0.194	1.13757e-47	3.03994e-45
SPAC7D4.08	YES_32	1.085	1.086	1.08259e-09	2.79622e-09
SPCC188.12	YES_32	1.02	1.013	1.92971e-05	3.49339e-05
SPBC83.01	YES_32	1.005	1.008	2.36459e-11	7.14933e-11
SPBC3B9.13c	YES_32	0.756	0.796	6.84594e-19	4.42059e-18
SPBC25H2.10c	YES_32	0.951	0.954	1.54021e-25	2.3468e-24
SPBC23G7.14	YES_32	1.008	1.007	2.3877e-05	4.29119e-05
SPBP4H10.18c	YES_32	1.046	1.043	0.692712	0.723102
SPCC790.03	YES_32	0.675	0.737	5.86887e-12	1.88838e-11
SPBC8D2.16c	YES_32	1.028	1.019	0.00175743	0.00262594
SPCC24B10.10c	YES_32	1.002	1.001	1.45695e-13	5.50156e-13
SPAC12B10.13	YES_32	0.977	0.979	2.27195e-16	1.10853e-15
SPBC776.11	YES_32	0.834	0.85	1.43365e-32	5.18802e-31
SPCC965.08c	YES_32	1.024	1.023	0.000184849	0.000306523
SPAC19B12.09	YES_32	0.955	0.953	4.61279e-26	7.79099e-25
SPBC21C3.19	YES_32	1.013	1.016	8.76544e-08	1.9032e-07
SPAC186.08c	YES_32	1.022	1.022	4.81846e-05	8.39484e-05
SPAC23A1.06c	YES_32	1.025	1.022	0.00619285	0.00877047
SPBC336.13c	YES_32	0.933	0.936	6.16749e-14	2.41011e-13
SPAC57A7.13	YES_32	0.999	0.986	7.71731e-10	2.02339e-09
SPBC1709.16c	YES_32	1.021	1.02	0.000239714	0.000392815
SPCC645.08c	YES_32	1.05	1.047	0.511524	0.550848
SPAC890.02c	YES_32	0.972	0.98	5.46061e-07	1.11852e-06
SPBC409.16c	YES_32	1.06	1.05	0.00585231	0.00830512
SPBC577.15c	YES_32	0.269	0.204	4.11612e-14	1.63984e-13
SPCC550.12	YES_32	0.951	0.945	3.41645e-19	2.28245e-18
SPCC1393.08	YES_32	1.094	1.097	6.43974e-10	1.69611e-09
SPAC56F8.16	YES_32	1.076	1.07	2.22084e-07	4.70152e-07
SPBC530.13	YES_32	1.045	1.05	0.948672	0.959723
SPAC10F6.08c	YES_32	1.026	1.025	0.0225354	0.029881
SPBC887.01	YES_32	1.056	1.05	0.0333004	0.0430538
SPCC24B10.09	YES_32	0.89	0.898	1.92365e-20	1.52574e-19
SPAC29B12.06c	YES_32	1.122	1.128	8.29387e-08	1.80419e-07
SPBC1921.01c	YES_32	0.917	0.926	2.85868e-22	2.9209e-21
SPAP8A3.07c	YES_32	0.737	0.882	8.26011e-14	3.19907e-13
SPBC16D10.02	YES_32	1.011	1.005	1.47729e-07	3.16797e-07
SPBC1921.06c	YES_32	0.76	0.755	1.92818e-29	4.75071e-28
SPCC364.04c	YES_32	1.035	1.033	0.108925	0.132356
SPAC12G12.03	YES_32	0.917	0.915	1.44728e-24	1.91903e-23
SPCC1442.13c	YES_32	1.059	1.054	0.0214739	0.0285496
SPBC17D11.01	YES_32	1.087	1.09	1.82958e-05	3.31384e-05
SPAC27E2.02	YES_32	1.02	1.017	0.0021294	0.00315864
SPBC29A10.03c	YES_32	1.004	1.003	3.76597e-09	9.24592e-09
SPAC15A10.08	YES_32	0.976	0.996	3.15036e-07	6.58902e-07
SPAC806.04c	YES_32	1.03	1.024	0.146437	0.174339
SPBC660.06	YES_32	1.04	1.035	0.596284	0.631937
SPAC14C4.13	YES_32	1.001	1.002	8.19672e-07	1.65844e-06
SPBC20F10.02c	YES_32	1.039	1.034	0.323453	0.361195
SPBC13G1.02	YES_32	1.008	0.999	2.6361e-12	8.78868e-12
SPCC1020.08	YES_32	1.001	1.002	6.23997e-13	2.21426e-12
SPBC16G5.06	YES_32	1.01	1.009	8.00008e-10	2.09122e-09
SPBC359.04c	YES_32	1.04	1.038	0.509854	0.549389
SPAC23C4.06c	YES_32	1.04	1.037	0.328652	0.366529
SPCC553.04	YES_32	0.811	0.814	5.55751e-36	2.92527e-34
SPAC144.03	YES_32	0.969	0.976	1.50755e-10	4.21339e-10
SPCC1620.04c	YES_32	1.054	1.056	0.0778234	0.0966582
SPBC25H2.16c	YES_32	1.002	0.999	1.25797e-12	4.31836e-12
SPCC777.12c	YES_32	1.012	1.004	2.00472e-05	3.61975e-05
SPAC144.14	YES_32	1.049	1.045	0.318666	0.356078
SPCC777.06c	YES_32	1.023	1.019	0.000125707	0.00021189
SPBC1773.14	YES_32	1.017	1.013	4.03285e-09	9.86629e-09
SPAC15A10.07	YES_32	1.019	1.016	7.90763e-07	1.60181e-06
SPAC30D11.06c	YES_32	1.068	1.065	2.49146e-05	4.46381e-05
SPAC17A5.02c	YES_32	0.848	0.938	7.71875e-09	1.84168e-08
SPAC30D11.05	YES_32	0.952	0.956	7.97562e-17	4.11087e-16
SPAC22F8.05	YES_32	0.998	0.995	6.97351e-13	2.44954e-12
SPBC1685.06	YES_32	0.998	0.993	1.06155e-09	2.748e-09
SPAC4F8.01	YES_32	0.935	0.937	2.37949e-16	1.15775e-15
SPAC29B12.02c	YES_32	1.033	1.029	0.0603657	0.0758172
SPAC12B10.04	YES_32	1.053	1.049	0.312765	0.350498
SPAC977.05c	YES_32	1.052	1.05	0.282032	0.318007
SPAC922.06	YES_32	1.02	1.014	0.000204185	0.000336978
SPAC14C4.10c	YES_32	0.994	0.992	6.44144e-12	2.06055e-11
SPCC830.10	YES_32	0.973	0.994	5.13757e-05	8.93289e-05
SPBC409.17c	YES_32	1.02	1.02	4.57893e-06	8.67824e-06
SPAC23A1.14c	YES_32	1.041	1.028	0.635585	0.66991
SPAC25A8.01c	YES_32	1.011	1.004	0.000389658	0.000624605
SPAC14C4.04	YES_32	1.034	1.029	0.0354664	0.0457011
SPAPB21F2.02	YES_32	0.924	0.921	5.03562e-28	1.02904e-26
SPAC767.01c	YES_32	1.018	1.014	0.00116876	0.00178395
SPBC115.03	YES_32	1.023	1.019	1.95459e-05	3.53291e-05
SPBP35G2.02	YES_32	0.988	0.984	1.84863e-14	7.58222e-14
SPAC25G10.09c	YES_32	0.956	0.95	3.94167e-20	2.99636e-19
SPCC965.14c	YES_32	1.028	1.02	0.007508	0.0105556
SPAC13G7.06	YES_32	0.937	0.933	5.30748e-20	3.9652e-19
SPAPB8E5.03	YES_32	1.06	1.054	0.00386458	0.00559632
SPAPJ698.02c	YES_32	0.229	0.232	1.7447e-32	6.18478e-31
SPAC4D7.07c	YES_32	0.976	0.976	1.94183e-22	2.04422e-21
SPBC27B12.03c	YES_32	1.051	1.051	0.375472	0.415146
SPCC18.09c	YES_32	1.027	1.025	0.0062215	0.00880746
SPCC1840.08c	YES_32	0.987	0.98	1.8307e-09	4.6524e-09
SPAC29A4.19c	YES_32	1.03	1.026	0.00892182	0.0124776
SPAC694.04c	YES_32	0.979	0.979	1.26679e-14	5.25787e-14
SPCPB16A4.04c	YES_32	0.907	0.923	9.39149e-24	1.10973e-22
SPAC22F3.10c	YES_32	0.957	0.969	5.67311e-11	1.66597e-10
SPBC2G2.08	YES_32	0.947	0.976	2.58732e-06	5.01023e-06
SPAPB24D3.08c	YES_32	0.993	0.998	4.70707e-11	1.39288e-10
SPAC458.06	YES_32	1.012	1.013	7.09389e-05	0.000122243
SPAC823.15	YES_32	1.017	1.019	0.000724022	0.00112944
SPBC20F10.10	YES_32	1.076	1.074	3.80124e-05	6.68972e-05
SPCC1906.04	YES_32	0.991	0.986	1.20338e-15	5.50794e-15
SPCC70.09c	YES_32	1.024	1.015	0.00025137	0.00041056
SPBC3D6.04c	YES_32	0.988	0.989	5.47957e-10	1.44981e-09
SPBC428.04	YES_32	0.898	0.898	1.12331e-24	1.51843e-23
SPBC651.06	YES_32	1	0.996	1.75705e-08	4.04505e-08
SPCC1020.05	YES_32	1.025	1.019	0.000151054	0.000252775
SPAC8C9.16c	YES_32	1.04	1.036	0.364413	0.404076
SPCC1672.04c	YES_32	0.94	0.925	4.90016e-05	8.52863e-05
SPCC297.04c	YES_32	1.025	1.024	0.000521206	0.000824907
SPAC20G4.01	YES_32	0.981	0.981	6.7413e-19	4.36113e-18
SPBP8B7.04	YES_32	1.022	1.023	0.000277614	0.000451301
SPCC965.13	YES_32	1.018	1.016	1.40628e-06	2.79326e-06
SPAC821.04c	YES_32	0.987	0.992	5.01822e-08	1.11395e-07
SPBC3H7.09	YES_32	0.861	0.855	6.33286e-22	6.09428e-21
SPAC18G6.04c	YES_32	1.021	1.015	0.00580131	0.00823611
SPBC530.11c	YES_32	0.989	0.982	1.57626e-10	4.39479e-10
SPBC776.14	YES_32	1.023	1.024	0.000593635	0.000932318
SPAC26H5.09c	YES_32	1.034	1.034	0.157874	0.186931
SPAC17H9.04c	YES_32	1.003	1	0.000170303	0.000283349
SPBC1711.11	YES_32	1.048	1.046	0.57067	0.607014
SPAC23H4.09	YES_32	1.06	1.065	0.0558604	0.0704645
SPBC11C11.02	YES_32	0.919	0.932	2.43179e-18	1.50589e-17
SPBC646.06c	YES_32	1.038	1.034	0.206069	0.239266
SPAC22E12.06c	YES_32	1.09	1.088	2.02365e-09	5.11285e-09
SPCC895.07	YES_32	0.948	0.932	6.69911e-17	3.4944e-16
SPCC162.04c	YES_32	1.063	1.065	0.00167572	0.00251467
SPAC1D4.09c	YES_32	1.027	1.016	0.0483186	0.0612399
SPBC26H8.14c	YES_32	0.991	0.982	1.04945e-08	2.47006e-08
SPAC14C4.08	YES_32	1.043	1.053	0.861216	0.883599
SPBC83.10	YES_32	0.844	0.85	3.13482e-37	2.05478e-35
SPCC1393.03	YES_32	0.861	0.872	4.92404e-24	6.08759e-23
SPAC2G11.04	YES_32	1.042	1.035	0.684969	0.717174
SPAC1002.01	YES_32	1.094	1.097	8.98328e-10	2.34118e-09
SPAC26A3.01	YES_32	0.993	0.99	9.21295e-11	2.65829e-10
SPAPB24D3.03	YES_32	1.036	1.031	0.116877	0.141376
SPAC6G9.16c	YES_32	1.063	1.065	0.00172995	0.00258739
SPBC19G7.02	YES_32	0.955	0.958	4.80732e-15	2.07719e-14
SPBC1E8.02	YES_32	1.066	1.042	0.0519388	0.0656129
SPBC1A4.05	YES_32	1.011	1.006	0.00260823	0.00384266
SPAC13A11.01c	YES_32	0.966	0.97	1.51386e-21	1.38398e-20
SPCC16A11.15c	YES_32	1.055	1.058	0.0262337	0.0343779
SPAC3F10.17	YES_32	0.194	0.182	1.29916e-44	2.50737e-42
SPAC29B12.11c	YES_32	1.035	1.035	0.231567	0.265763
SPBC29A10.06c	YES_32	1.031	1.03	0.0142434	0.0194503
SPAC1687.10	YES_32	1.027	1.035	0.137953	0.164577
SPAC8F11.10c	YES_32	1.08	1.066	6.502e-06	1.21834e-05
SPAC3C7.07c	YES_32	1.076	1.068	0.00065319	0.00102308
SPBC776.16	YES_32	1.062	1.057	0.00268344	0.00394343
SPAC19B12.12c	YES_32	1.092	1.091	2.65736e-06	5.13442e-06
SPCC1223.12c	YES_32	0.993	1.002	3.17668e-05	5.63051e-05
SPAC11D3.13	YES_32	1.098	1.081	1.15578e-08	2.70929e-08
SPBC3B9.04	YES_32	1.1	1.095	3.37549e-11	1.00916e-10
SPCC1906.02c	YES_32	0.926	0.934	1.15992e-19	8.25728e-19
SPCC576.13	YES_32	0.976	0.968	1.30987e-09	3.36575e-09
SPAC17A2.10c	YES_32	1.088	1.082	2.26352e-09	5.69403e-09
SPCC1682.14	YES_32	0.795	0.804	3.7314e-20	2.84899e-19
SPBC17G9.08c	YES_32	1.066	1.062	0.000912835	0.00140801
SPAC1556.04c	YES_32	1.108	1.109	3.77164e-14	1.51126e-13
SPCC825.05c	YES_32	0.989	0.998	1.59536e-11	4.91338e-11
SPBC582.05c	YES_32	0.966	0.977	5.46113e-13	1.94385e-12
SPAC15E1.02c	YES_32	1.045	1.037	0.875084	0.895975
SPAC6C3.03c	YES_32	1.093	1.082	1.51514e-12	5.17053e-12
SPAC17G8.11c	YES_32	0.799	0.804	2.22346e-34	9.2684e-33
SPAC3A11.07	YES_32	1.028	1.017	0.0121691	0.0167627
SPAC23D3.04c	YES_32	0.968	0.979	1.315e-09	3.37642e-09
SPBC16E9.09c	YES_32	1.017	1.022	0.207533	0.240725
SPAC4F8.03	YES_32	0.925	0.969	7.14605e-09	1.71091e-08
SPCC970.01	YES_32	0.947	0.966	2.61852e-13	9.6466e-13
SPAC4G8.10	YES_32	0.842	0.846	6.45427e-25	9.1147e-24
SPAC140.03	YES_32	0.959	0.94	4.44056e-10	1.18848e-09
SPAPB8E5.06c	YES_32	0.944	0.961	1.83123e-16	9.02367e-16
SPBC21D10.12	YES_32	1.02	1.019	0.00171359	0.00256928
SPAC167.06c	YES_32	0.988	0.994	4.12165e-14	1.64016e-13
SPAC869.11	YES_32	0.912	0.931	1.52744e-13	5.749e-13
SPBP4H10.17c	YES_32	1.038	1.039	0.386657	0.426698
SPAC823.12	YES_32	0.733	0.733	9.09985e-39	9.03225e-37
SPBC3B8.02	YES_32	0.98	0.991	1.52348e-07	3.26501e-07
SPAC186.06	YES_32	1.019	1.021	5.65354e-06	1.06164e-05
SPBC11B10.10c	YES_32	0.81	0.808	1.79409e-34	7.69465e-33
SPAC11E3.03	YES_32	0.948	0.974	2.4088e-10	6.59951e-10
SPBC21C3.06	YES_32	1.014	1.011	3.30397e-08	7.4484e-08
SPBP35G2.04c	YES_32	0.937	0.933	4.32821e-33	1.58276e-31
SPAC26F1.07	YES_32	1.004	1.004	2.60545e-13	9.60865e-13
SPAC17A2.07c	YES_32	1.009	1.008	5.04764e-07	1.03883e-06
SPAC13G7.12c	YES_32	1.053	1.05	0.204369	0.237531
SPBC1306.02	YES_32	0.99	0.987	1.12193e-07	2.42237e-07
SPBC11C11.01	YES_32	1.008	1.01	1.7249e-06	3.40086e-06
SPAC823.09c	YES_32	1.032	1.002	0.535226	0.573174
SPBC28F2.03	YES_32	0.988	0.982	1.60023e-14	6.61023e-14
SPCC285.04	YES_32	1.044	1.042	0.956851	0.966589
SPCC645.12c	YES_32	1.003	0.995	6.10691e-09	1.46921e-08
SPCC126.08c	YES_32	0.938	0.939	6.06217e-25	8.59591e-24
SPAC3G9.01	YES_32	0.962	0.959	5.92039e-26	9.70162e-25
SPAC6B12.14c	YES_32	1.003	1.002	4.49628e-14	1.77703e-13
SPCC1322.07c	YES_32	1.04	1.04	0.542031	0.57939
SPBC31F10.08	YES_32	0.982	0.982	5.09332e-16	2.43052e-15
SPBC1198.01	YES_32	0.994	0.989	1.52812e-10	4.26743e-10
SPAC4H3.01	YES_32	0.987	0.992	1.29872e-10	3.65619e-10
SPAC823.16c	YES_32	1.065	1.064	0.00260972	0.00384323
SPBC215.11c	YES_32	1.031	1.035	0.0118704	0.0163642
SPCC794.02	YES_32	1.026	1.025	0.000114613	0.000193754
SPCC825.02	YES_32	0.911	0.91	1.20221e-28	2.71199e-27
SPBC3D6.06c	YES_32	1.025	1.019	0.00557708	0.00794699
SPAC4F10.04	YES_32	0.873	0.869	5.66946e-21	4.86314e-20
SPBPB2B2.07c	YES_32	1.022	1.015	4.36117e-05	7.62876e-05
SPCC1259.08	YES_32	0.974	0.979	7.53016e-17	3.89863e-16
SPBC12D12.09	YES_32	1	0.998	4.54029e-14	1.79238e-13
SPCC18.06c	YES_32	0.455	0.472	1.10619e-30	3.22932e-29
SPCC306.07c	YES_32	1.024	1.015	0.000792833	0.00123125
SPBP8B7.13	YES_32	0.941	0.945	1.45312e-25	2.22385e-24
SPCC285.15c	YES_32	0.826	0.813	2.88052e-24	3.72005e-23
SPCC970.05	YES_32	0.835	0.849	5.12203e-21	4.42635e-20
SPCC417.03	YES_32	1.001	1.005	3.4752e-13	1.26285e-12
SPBC839.03c	YES_32	0.892	0.906	3.78902e-21	3.3073e-20
SPAC1952.10c	YES_32	1.013	1.013	7.26686e-14	2.82699e-13
SPCC24B10.08c	YES_32	0.808	0.817	3.44115e-32	1.17201e-30
SPBP8B7.02	YES_32	1.021	1.015	9.3955e-05	0.000160157
SPAC29A4.09	YES_32	0.979	0.984	1.15133e-09	2.96936e-09
SPAC1527.03	YES_32	1.055	1.049	0.210933	0.244017
SPBC20F10.03	YES_32	1.024	1.025	0.00151947	0.00229107
SPAC1F7.12	YES_32	1.062	1.056	0.00456396	0.00655986
SPBC106.03	YES_32	1.085	1.081	1.5156e-08	3.50313e-08
SPCC594.06c	YES_32	1.014	1.006	9.07651e-08	1.96828e-07
SPBC14F5.11c	YES_32	1.055	1.052	0.176751	0.207654
SPAC14C4.09	YES_32	0.696	0.71	5.99066e-29	1.38744e-27
SPBP35G2.07	YES_32	0.939	0.942	2.44621e-16	1.18689e-15
SPBC28E12.03	YES_32	0.905	0.9	4.08452e-31	1.2447e-29
SPAC3A11.04	YES_32	1.051	1.053	0.315774	0.353414
SPBC887.06c	YES_32	1.1	1.088	7.92179e-08	1.72975e-07
SPAC17A5.18c	YES_32	1.053	1.054	0.0855122	0.105493
SPAPB8E5.08	YES_32	1.047	1.042	0.517947	0.556461
SPAC3A11.14c	YES_32	1.031	1.029	0.00513082	0.00732613
SPBC3D6.05	YES_32	0.989	0.998	1.3472e-10	3.78654e-10
SPBC24C6.10c	YES_32	0.853	0.864	3.29132e-27	6.3508e-26
SPAC17C9.11c	YES_32	1.058	1.053	0.0575816	0.0725303
SPBC30D10.03c	YES_32	1.07	1.054	0.000166221	0.000277221
SPAC2C4.07c	YES_32	1.026	1.019	0.00936642	0.0130574
SPBC29A3.02c	YES_32	1.013	1.004	1.06963e-07	2.31375e-07
SPAC1834.07	YES_32	1.025	1.022	0.00453847	0.00652863
SPAC9E9.09c	YES_32	0.93	0.926	7.22785e-09	1.72931e-08
SPAC17G6.15c	YES_32	0.999	1	4.64523e-06	8.79429e-06
SPBC800.05c	YES_32	1.001	1.006	4.27083e-12	1.39707e-11
SPAC29A4.05	YES_32	1.076	1.077	8.65349e-06	1.60761e-05
SPBC215.10	YES_32	1.044	1.042	0.956758	0.966589
SPBC649.04	YES_32	1.019	1.017	2.52936e-06	4.90072e-06
SPAC31G5.17c	YES_32	1.08	1.063	0.000423728	0.000675554
SPBC3H7.11	YES_32	1.017	1.013	0.0004557	0.000724863
SPAC13G6.15c	YES_32	1.016	1.014	0.00338253	0.00492701
SPCC594.02c	YES_32	0.965	0.965	3.33874e-12	1.1036e-11
SPAC2F3.08	YES_32	1.053	1.052	0.213894	0.247113
SPCC1739.06c	YES_32	0.929	0.941	1.41206e-15	6.3957e-15
SPBC14F5.09c	YES_32	0.948	0.958	7.57164e-12	2.40218e-11
SPCP1E11.04c	YES_32	1.004	1.002	1.05945e-08	2.4919e-08
SPAC29B12.08	YES_32	0.992	0.991	1.66883e-08	3.8445e-08
SPAC1002.02	YES_32	1.051	1.042	0.247715	0.282754
SPBC28E12.02	YES_32	1.017	1.012	1.08918e-06	2.18591e-06
SPAC17A5.07c	YES_32	1.013	1.015	7.10802e-05	0.000122426
SPBC1198.08	YES_32	1.029	1.028	0.00128773	0.00195673
SPAC1952.05	YES_32	0.91	0.91	1.10999e-18	7.04957e-18
SPAC20G4.08	YES_32	0.998	0.995	2.85996e-15	1.26728e-14
SPAC23D3.11	YES_32	1.03	1.03	0.00895442	0.0125182
SPBC1718.03	YES_32	0.737	0.978	1.0724e-09	2.77196e-09
SPAC4G9.11c	YES_32	1.028	1.03	0.0187291	0.0250731
SPCC306.09c	YES_32	0.652	0.879	2.69748e-10	7.34409e-10
SPAC4G8.11c	YES_32	0.896	0.92	1.11665e-10	3.18232e-10
SPAC19G12.08	YES_32	0.928	0.931	1.23817e-12	4.25461e-12
SPAPYUG7.04c	YES_32	1.07	1.047	0.0161149	0.0217663
SPBC21H7.03c	YES_32	1.01	1.001	1.87059e-08	4.29506e-08
SPAC1783.06c	YES_32	1.003	1.007	3.44178e-11	1.02721e-10
SPAC8C9.05	YES_32	1.024	1.018	0.00608963	0.00863132
SPAC31A2.12	YES_32	0.931	0.935	1.74411e-30	4.92605e-29
SPBC26H8.12	YES_32	0.779	0.853	3.26364e-09	8.0582e-09
SPAC25H1.06	YES_32	1.04	1.037	0.357948	0.397415
SPBC12C2.09c	YES_32	1.002	1	1.3635e-09	3.49837e-09
SPAC1296.02	YES_32	0.955	0.958	4.6933e-14	1.84649e-13
SPBC29A3.08	YES_32	1.01	1.014	0.000227283	0.000372796
SPBP4H10.05c	YES_32	0.941	0.937	1.27756e-15	5.82448e-15
SPAC4G9.16c	YES_32	0.743	0.765	7.42235e-26	1.17741e-24
SPAC17H9.13c	YES_32	0.958	0.961	4.72298e-13	1.69676e-12
SPAC1610.02c	YES_32	0.938	0.935	9.83891e-20	7.07668e-19
SPBC16C6.01c	YES_32	1.055	1.038	0.129799	0.15592
SPBC15D4.05	YES_32	0.993	0.984	5.45212e-12	1.76356e-11
SPBC1604.03c	YES_32	0.734	0.729	2.72067e-22	2.79146e-21
SPBC2A9.13	YES_32	1.026	1.023	0.000590799	0.000928283
SPCC306.02c	YES_32	0.952	0.959	4.07041e-14	1.62349e-13
SPCC830.08c	YES_32	1.031	1.027	0.00969144	0.0134942
SPCC16C4.13c	YES_32	0.712	0.713	4.01096e-27	7.57287e-26
SPAC688.12c	YES_32	1.03	1.033	0.0353208	0.0455305
SPAC6C3.07	YES_32	0.999	0.995	4.35727e-09	1.06226e-08
SPCC1259.09c	YES_32	1.032	1.031	0.0973521	0.119337
SPBC405.05	YES_32	1.032	1.021	0.0500592	0.0633767
SPBC1271.12	YES_32	0.953	0.945	9.02087e-14	3.48206e-13
SPAC5D6.10c	YES_32	1.01	1.005	5.79977e-08	1.28089e-07
SPBC106.07c	YES_32	0.98	0.981	2.54704e-10	6.96178e-10
SPBC21B10.07	YES_32	1.009	1.011	2.68017e-12	8.92706e-12
SPAC3F10.09	YES_32	0.938	0.941	2.13421e-18	1.32872e-17
SPCP31B10.02	YES_32	1.028	1.025	0.0280914	0.0366878
SPBC609.04	YES_32	1.027	1.02	0.018515	0.0247961
SPAC9.11	YES_32	1.024	1.02	0.0172867	0.0232227
SPCC16A11.07	YES_32	0.873	0.863	1.02898e-29	2.6479e-28
SPCC1259.14c	YES_32	1.047	1.038	0.591506	0.627639
SPAC3H5.05c	YES_32	0.843	0.835	1.12893e-33	4.35766e-32
SPCC191.06	YES_32	1.013	1.01	2.09615e-05	3.77503e-05
SPCC330.03c	YES_32	1.031	1.033	0.0258239	0.0339049
SPAC3G6.05	YES_32	0.993	0.99	1.69805e-16	8.42719e-16
SPAC11H11.02c	YES_32	1.012	1.001	5.51656e-06	1.0376e-05
SPCP31B10.05	YES_32	0.997	0.99	1.05844e-11	3.32161e-11
SPCC548.04	YES_32	1.007	1.008	3.95098e-12	1.2961e-11
SPBC947.03c	YES_32	0.993	0.991	5.13648e-12	1.66768e-11
SPAC19G12.09	YES_32	1.016	1.013	5.75352e-06	1.07983e-05
SPBC2G2.15c	YES_32	0.998	0.99	5.00009e-08	1.11134e-07
SPBPJ4664.05	YES_32	1.052	1.049	0.28152	0.317636
SPAC31G5.11	YES_32	1.007	1.005	0.000109331	0.000185458
SPBC23E6.03c	YES_32	1.009	1.011	1.62419e-08	3.74415e-08
SPAC5D6.13	YES_32	0.915	0.924	5.05e-26	8.39412e-25
SPBC4B4.12c	YES_32	0.998	0.993	4.80759e-10	1.28079e-09
SPBC6B1.03c	YES_32	1.015	1.014	1.27756e-10	3.60248e-10
SPBC530.15c	YES_32	1.031	1.026	0.023079	0.0305318
SPCC5E4.10c	YES_32	1.005	1.008	5.24983e-13	1.87325e-12
SPCC1682.11c	YES_32	1.022	1.016	0.00327913	0.00477839
SPBC13E7.03c	YES_32	1.045	1.046	0.899779	0.916666
SPAC3A11.13	YES_32	0.872	0.866	9.89777e-26	1.54192e-24
SPAC1565.03	YES_32	1.039	1.033	0.342057	0.380746
SPCC364.02c	YES_32	1.033	1.026	0.1507	0.179108
SPAC3C7.14c	YES_32	1.016	1.013	2.11306e-06	4.13099e-06
SPBC530.07c	YES_32	1.045	1.039	0.848458	0.871539
SPAC17G8.05	YES_32	0.908	0.92	4.92282e-10	1.31049e-09
SPBC1271.03c	YES_32	1.012	1.013	4.17348e-08	9.36002e-08
SPCC1739.13	YES_32	1.001	0.995	6.29192e-08	1.38782e-07
SPBC651.12c	YES_32	1.015	1.016	1.11638e-06	2.23792e-06
SPBC2F12.09c	YES_32	0.998	0.994	1.45796e-15	6.59501e-15
SPAC1B3.07c	YES_32	1.034	1.038	0.173496	0.204036
SPAC19D5.01	YES_32	1.009	1.005	4.3828e-09	1.06773e-08
SPCC18B5.09c	YES_32	1.031	1.019	0.0161526	0.0217834
SPBC354.01	YES_32	1.052	1.043	0.372546	0.412305
SPAC328.05	YES_32	1.047	1.043	0.527842	0.56579
SPBC2G2.09c	YES_32	1.018	1.019	3.77488e-07	7.84326e-07
SPAC1A6.06c	YES_32	1.029	1.037	0.0104755	0.0145161
SPACUNK4.09	YES_32	1.01	1.018	3.09152e-05	5.48796e-05
SPAC343.09	YES_32	0.995	0.988	3.81174e-07	7.91511e-07
SPBC887.17	YES_32	0.984	0.981	4.31824e-17	2.31863e-16
SPBC428.06c	YES_32	0.961	0.961	1.01353e-14	4.26271e-14
SPBC23E6.01c	YES_32	0.991	0.993	1.23764e-12	4.25461e-12
SPAC24B11.10c	YES_32	0.892	0.888	4.49779e-35	2.08338e-33
SPCC1753.03c	YES_32	1.031	1.022	0.0181075	0.0242784
SPAP8A3.04c	YES_32	1.041	1.032	0.679262	0.711627
SPBC685.03	YES_32	1.055	1.04	0.242259	0.27721
SPBC15D4.01c	YES_32	1.073	1.057	0.0154194	0.0209246
SPCC594.04c	YES_32	0.818	0.844	5.57652e-20	4.14836e-19
SPBC25B2.08	YES_32	1.002	1.001	2.36452e-12	7.91363e-12
SPCC191.09c	YES_32	1.019	1.013	5.81293e-05	0.000100669
SPAPJ760.02c	YES_32	1.021	1.023	4.62363e-05	8.07567e-05
SPAC1002.06c	YES_32	1.002	0.996	3.60183e-10	9.69982e-10
SPBC12D12.07c	YES_32	0.952	0.958	1.77468e-16	8.76991e-16
SPAC1002.12c	YES_32	1.034	1.028	0.0438686	0.0559881
SPBC19C2.09	YES_32	1.031	1.029	0.0236974	0.0313141
SPAC17A5.10	YES_32	0.998	0.994	3.37284e-14	1.35459e-13
SPBC21B10.06c	YES_32	1.017	1.016	5.59916e-06	1.05257e-05
SPAC1A6.08c	YES_32	1.022	1.02	0.000373397	0.000599714
SPAC1B3.08	YES_32	1.099	1.085	7.72822e-08	1.69067e-07
SPAC23H3.08c	YES_32	0.988	0.986	3.44002e-19	2.29379e-18
SPBC2D10.05	YES_32	1.039	1.038	0.347462	0.386143
SPAC57A7.07c	YES_32	1.026	1.017	0.0102036	0.0141506
SPAC4H3.14c	YES_32	1.001	0.995	1.28325e-08	2.98995e-08
SPAC27D7.12c	YES_32	1.07	1.06	0.00150008	0.00226282
SPBC1105.02c	YES_32	1.006	1.008	3.30163e-06	6.32297e-06
SPBC21C3.15c	YES_32	1.01	1.007	2.1512e-06	4.20319e-06
SPAC17G8.08c	YES_32	1.014	1.011	3.05559e-07	6.40236e-07
SPBC1539.04	YES_32	0.999	1.01	2.48624e-06	4.82256e-06
SPCC1020.09	YES_32	0.987	0.985	1.31522e-15	5.97266e-15
SPAC1486.08	YES_32	0.936	0.966	2.46896e-13	9.1441e-13
SPAC4A8.07c	YES_32	0.98	0.986	4.11229e-25	5.85495e-24
SPBC13E7.07	YES_32	1.02	1.021	8.47125e-06	1.57459e-05
SPAC12B10.14c	YES_32	1.008	1.008	5.00548e-09	1.21347e-08
SPBC3B8.10c	YES_32	0.929	0.922	5.69628e-20	4.2284e-19
SPCC191.05c	YES_32	1.031	1.025	0.132949	0.159429
SPAC22F3.02	YES_32	1.018	1.017	1.07371e-07	2.32115e-07
SPAC16A10.03c	YES_32	0.968	0.965	2.03057e-14	8.29905e-14
SPBC16H5.07c	YES_32	0.951	0.948	2.88235e-19	1.94811e-18
SPBC1773.02c	YES_32	1.052	1.046	0.18187	0.213091
SPBC1711.06	YES_32	0.87	0.87	1.93385e-34	8.19291e-33
SPBC365.12c	YES_32	1.027	1.032	0.000885499	0.00136965
SPCC550.11	YES_32	0.886	0.913	3.62962e-14	1.45604e-13
SPAC17A5.05c	YES_32	1.007	1.001	3.65103e-10	9.8247e-10
SPAC9E9.14	YES_32	0.995	0.993	3.23804e-06	6.21147e-06
SPAC890.06	YES_32	1.005	1.003	1.19856e-10	3.39349e-10
SPCC1742.01	YES_32	1.079	1.073	0.00020828	0.000343247
SPCC297.06c	YES_32	1.053	1.059	0.199454	0.232206
SPBC577.14c	YES_32	0.984	0.989	3.17412e-11	9.53882e-11
SPBC1683.07	YES_32	1.014	1.007	1.29061e-05	2.37226e-05
SPBC17G9.10	YES_32	0.663	0.657	6.35927e-38	5.02093e-36
SPBC16E9.06c	YES_32	1.036	1.031	0.111873	0.135748
SPBC23E6.10c	YES_32	1.017	1.019	7.89775e-07	1.60075e-06
SPBC56F2.10c	YES_32	0.968	0.965	3.45048e-15	1.5135e-14
SPAC10F6.07c	YES_32	1.013	1.008	3.05113e-07	6.39688e-07
SPBC660.17c	YES_32	0.967	0.967	1.31495e-15	5.97266e-15
SPBC577.11	YES_32	0.98	0.976	2.53116e-10	6.92381e-10
SPCC18.01c	YES_32	1.052	1.05	0.232689	0.266963
SPCC126.13c	YES_32	1.065	1.066	0.0271541	0.0355037
SPBC405.02c	YES_32	1.024	1.017	0.000258464	0.000421155
SPAC11G7.03	YES_32	0.93	0.94	2.5615e-19	1.74483e-18
SPCC338.08	YES_32	0.919	0.912	5.8031e-16	2.74659e-15
SPBC13G1.12	YES_32	0.947	0.944	1.02037e-14	4.2863e-14
SPAC15F9.01c	YES_32	1.045	1.039	0.939862	0.952275
SPAC1142.06	YES_32	1.011	1.005	1.54385e-06	3.05777e-06
SPBC428.05c	YES_32	0.913	0.92	5.7323e-23	6.32191e-22
SPCC569.04	YES_32	1.045	1.048	0.928778	0.942066
SPAC20G8.07c	YES_32	1.031	1.031	0.00656689	0.00928127
SPCC1259.13	YES_32	1.008	1.007	1.27429e-09	3.27918e-09
SPCC16C4.20c	YES_32	0.975	0.971	1.86791e-06	3.67239e-06
SPAC323.01c	YES_32	0.94	0.94	1.24982e-07	2.69346e-07
SPAC3G6.04	YES_32	0.926	0.932	3.10308e-22	3.16132e-21
SPBC25B2.10	YES_32	1.041	1.025	0.686387	0.718225
SPBC18H10.19	YES_32	1.024	1.023	0.00976	0.0135842
SPBC577.06c	YES_32	1.05	1.041	0.265012	0.30018
SPBC725.15	YES_32	0.943	0.954	4.84107e-19	3.16721e-18
SPCC550.03c	YES_32	0.718	0.771	5.90779e-24	7.17611e-23
SPCC1739.05	YES_32	1.042	1.039	0.731723	0.760396
SPBC1734.05c	YES_32	0.994	0.993	1.06006e-13	4.05115e-13
SPAC18G6.13	YES_32	0.968	0.962	2.79275e-14	1.12683e-13
SPAC1610.01	YES_32	0.953	0.956	6.90297e-17	3.58996e-16
SPCC338.18	YES_32	1.051	1.05	0.283207	0.319124
SPACUNK4.07c	YES_32	1.057	1.056	0.0238591	0.0314919
SPAC56F8.14c	YES_32	1.054	1.051	0.152999	0.181529
SPBC6B1.04	YES_32	0.988	0.999	9.88959e-09	2.32925e-08
SPAC18B11.09c	YES_32	1.028	1.019	0.00253816	0.00374579
SPBC1347.13c	YES_32	1.042	1.032	0.69404	0.72427
SPBC713.09	YES_32	0.999	1.005	1.69735e-12	5.75839e-12
SPBC2G2.07c	YES_32	0.904	0.898	3.9143e-25	5.59601e-24
SPAC3H1.03	YES_32	1.051	1.046	0.212684	0.24596
SPAC19D5.03	YES_32	1.022	1.022	0.00154605	0.00232711
SPCC285.10c	YES_32	1.04	1.028	0.586789	0.622824
SPBC2D10.12	YES_32	0.956	0.963	3.72424e-08	8.37411e-08
SPAC4A8.06c	YES_32	1.015	1.012	4.58739e-10	1.22589e-09
SPBC31A8.01c	YES_32	0.977	0.982	3.17579e-17	1.72655e-16
SPAC1F3.09	YES_32	1.035	1.039	0.183008	0.214353
SPAPB1A10.14	YES_32	0.993	1.022	0.00012842	0.000216149
SPBC36B7.03	YES_32	1.032	1.02	0.195694	0.22811
SPBC8D2.12c	YES_32	0.889	0.901	3.94028e-27	7.48006e-26
SPCC13B11.04c	YES_32	1.081	1.073	5.41023e-06	1.01981e-05
SPBC1734.06	YES_32	0.965	0.967	1.08331e-18	6.89271e-18
SPCC24B10.11c	YES_32	0.989	0.993	2.66961e-16	1.29348e-15
SPAPJ695.01c	YES_32	1.043	1.041	0.879016	0.899471
SPBC8E4.02c	YES_32	1.065	1.059	0.000717032	0.00111903
SPAC20G8.09c	YES_32	1.031	1.023	0.0377675	0.0485044
SPCC645.11c	YES_32	1.01	1.007	3.42207e-12	1.12899e-11
SPCC962.05	YES_32	1.032	1.024	0.0131791	0.018068
SPCC2H8.05c	YES_32	1.042	1.043	0.641162	0.67456
SPAC13F5.01c	YES_32	1.008	1.004	6.93948e-07	1.41146e-06
SPAC1002.07c	YES_32	1.05	1.047	0.344279	0.382973
SPBC30D10.04	YES_32	0.877	0.888	2.63244e-22	2.71367e-21
SPAC1002.17c	YES_32	1.039	1.04	0.361889	0.401534
SPAC2E1P3.04	YES_32	1.014	1.011	4.84487e-07	9.98284e-07
SPAC1834.09	YES_32	1.025	1.024	9.22073e-05	0.000157255
SPAC20H4.11c	YES_32	1.058	1.051	0.069769	0.0870921
SPAC1F5.07c	YES_32	0.921	0.928	1.85268e-17	1.0381e-16
SPAC25B8.01	YES_32	0.989	0.99	6.33821e-24	7.67211e-23
SPBC3H7.06c	YES_32	1.029	1.031	0.000560426	0.000883758
SPAC5H10.01	YES_32	1.025	1.021	7.944e-05	0.000136015
SPAC16E8.06c	YES_32	0.982	0.986	1.16017e-16	5.9184e-16
SPAC5D6.07c	YES_32	0.965	0.958	5.38752e-15	2.31351e-14
SPAC4F10.08	YES_32	1.029	1.035	0.382924	0.422713
SPBC119.03	YES_32	1.068	1.064	0.000113695	0.000192296
SPBC25D12.02c	YES_32	0.965	0.969	2.51921e-10	6.89656e-10
SPAC18B11.03c	YES_32	0.987	0.983	2.27657e-19	1.5661e-18
SPAC22F3.11c	YES_32	1.051	1.051	0.187693	0.219249
SPCC1223.10c	YES_32	1.007	1.001	0.000211952	0.000348968
SPAC31A2.13c	YES_32	0.6	0.46	9.2812e-15	3.91772e-14
SPAC12B10.03	YES_32	1.093	1.085	9.77666e-09	2.30421e-08
SPBC15C4.06c	YES_32	1.006	1	2.08402e-08	4.77566e-08
SPAC139.03	YES_32	1.006	1.006	8.95121e-10	2.33457e-09
SPCC622.15c	YES_32	1.076	1.074	1.35602e-05	2.48689e-05
SPAC57A10.08c	YES_32	0.995	0.994	2.55242e-11	7.70382e-11
SPAC23A1.16c	YES_32	1.046	1.038	0.765846	0.793483
SPAC16E8.01	YES_32	0.771	0.778	1.37244e-37	9.34876e-36
SPBC1703.12	YES_32	1.037	1.031	0.254379	0.289362
SPBC18H10.10c	YES_32	1.005	1.001	2.54906e-07	5.36368e-07
SPBC21C3.20c	YES_32	0.806	0.836	5.85192e-19	3.80704e-18
SPBC3E7.06c	YES_32	1.055	1.052	0.115579	0.139952
SPAC1399.04c	YES_32	1.012	1.016	4.26909e-08	9.56828e-08
SPAC17C9.10	YES_32	1.022	1.02	7.2555e-07	1.47401e-06
SPCC1919.04	YES_32	1.001	1.003	6.62664e-17	3.4618e-16
SPAPB8E5.04c	YES_32	1.008	0.997	3.87813e-07	8.04816e-07
SPAC922.07c	YES_32	0.993	0.989	2.48173e-09	6.22043e-09
SPAC18B11.11	YES_32	0.872	0.873	1.29014e-35	6.22491e-34
SPAC11H11.05c	YES_32	1.034	1.028	0.119962	0.144754
SPBC800.12c	YES_32	1.031	1.025	0.0100146	0.0138996
SPBC16C6.03c	YES_32	0.899	0.907	3.66453e-23	4.11992e-22
SPAC6G10.06	YES_32	0.996	0.997	2.80095e-14	1.12883e-13
SPBC28F2.02	YES_32	1.036	1.029	0.224835	0.258721
SPCC1183.06	YES_32	1.007	1.007	6.71233e-13	2.36737e-12
SPAC139.02c	YES_32	1.043	1.042	0.793793	0.820725
SPBC685.04c	YES_32	1.029	1.03	0.00480778	0.00688752
SPBC713.05	YES_32	1.034	1.028	0.106943	0.130083
SPAC1952.08c	YES_32	1.013	1.006	9.15586e-11	2.64401e-10
SPCC1442.07c	YES_32	1.01	1.011	1.12006e-10	3.1868e-10
SPBC11C11.08	YES_32	1.003	1.006	2.02813e-06	3.97165e-06
SPAC19E9.02	YES_32	0.924	0.927	1.98708e-27	3.92223e-26
SPCC364.01	YES_32	1.009	1.012	1.75237e-11	5.36364e-11
SPCC737.09c	YES_32	0.996	0.992	2.21746e-15	9.93994e-15
SPAC23H3.06	YES_32	0.966	0.966	5.06257e-13	1.81313e-12
SPAC14C4.01c	YES_32	0.942	0.97	2.19262e-09	5.52368e-09
SPCPB16A4.06c	YES_32	1.025	1.018	0.000457336	0.000727133
SPAC222.12c	YES_32	0.271	0.28	3.14864e-43	4.75582e-41
SPCC4F11.02	YES_32	0.933	0.92	2.24334e-10	6.1559e-10
SPAC1142.01	YES_32	1.014	1.015	0.0628925	0.0788483
SPAC4A8.02c	YES_32	1.056	1.052	0.117124	0.141625
SPAC140.02	YES_32	0.964	0.962	1.14896e-10	3.26599e-10
SPBC27B12.08	YES_32	0.942	0.944	2.74916e-15	1.21974e-14
SPBC2D10.11c	YES_32	1.054	1.048	0.160877	0.190292
SPBC651.09c	YES_32	0.896	0.9	3.15144e-17	1.716e-16
SPBC83.18c	YES_32	0.962	0.969	3.06459e-21	2.70213e-20
SPAC144.11	YES_32	0.821	0.829	1.94821e-26	3.4531e-25
SPAC869.02c	YES_32	1.035	1.036	0.0829919	0.102603
SPCC1919.13c	YES_32	1.048	1.042	0.518018	0.556461
SPAC6G10.10c	YES_32	1.067	1.067	0.000193203	0.000319461
SPAC16E8.17c	YES_32	1.052	1.048	0.118423	0.143146
SPAC3A11.11c	YES_32	1.03	1.029	0.0158642	0.0214611
SPAC1783.04c	YES_32	0.948	0.948	6.46532e-22	6.18748e-21
SPAC589.10c	YES_32	0.883	0.895	6.53879e-27	1.22128e-25
SPAPJ691.02	YES_32	1.029	1.026	0.0112025	0.0154926
SPAC1B1.02c	YES_32	1.029	1.021	0.0247952	0.0326901
SPBC13G1.04c	YES_32	1.008	1.009	7.0103e-08	1.54138e-07
SPAC2E1P5.02c	YES_32	1.042	1.031	0.630495	0.66515
SPBPB21E7.01c	YES_32	1.024	1.022	2.88602e-05	5.14155e-05
SPBC2G5.01	YES_32	1.019	1.014	5.4473e-05	9.44779e-05
SPBC6B1.10	YES_32	1.021	1.018	0.000889338	0.00137436
SPAC20H4.09	YES_32	1.025	1.018	0.0225951	0.0299372
SPCC338.14	YES_32	1.026	1.004	0.204525	0.237632
SPBC776.03	YES_32	0.995	1.005	1.07998e-07	2.33324e-07
SPAC607.06c	YES_32	1.044	1.042	0.939857	0.952275
SPBC31F10.10c	YES_32	0.399	0.384	2.66814e-24	3.45863e-23
SPAC1F7.06	YES_32	1.076	1.071	1.59557e-06	3.15482e-06
SPBC1271.06c	YES_32	1.063	1.059	0.000734379	0.00114405
SPAC2F7.06c	YES_32	1.065	1.063	0.000735204	0.00114482
SPBC902.06	YES_32	0.94	0.945	3.58743e-18	2.18262e-17
SPCC14G10.04	YES_32	0.837	0.853	5.25731e-09	1.27186e-08
SPBC29A10.05	YES_32	0.934	0.943	4.21153e-19	2.78153e-18
SPAC22A12.07c	YES_32	0.903	0.911	3.29502e-22	3.30836e-21
SPCC285.13c	YES_32	0.916	0.941	1.64156e-10	4.56588e-10
SPBC8E4.05c	YES_32	1.071	1.064	5.36803e-05	9.32428e-05
SPBC3B8.06	YES_32	1.046	1.045	0.720096	0.749884
SPCC663.06c	YES_32	1.026	1.026	0.000279339	0.000453893
SPAC17C9.16c	YES_32	1.036	1.033	0.114584	0.138844
SPCC31H12.06	YES_32	1.037	1.034	0.207661	0.240792
SPAC1556.01c	YES_32	0.535	0.554	3.2187e-39	3.28876e-37
SPAC1071.09c	YES_32	0.992	0.998	2.54434e-13	9.39453e-13
SPBC685.02	YES_32	1.046	1.048	0.732313	0.760782
SPAC1002.18	YES_32	1.002	0.998	2.0991e-11	6.37995e-11
SPCC1919.12c	YES_32	1.025	1.015	0.00256927	0.00378847
SPAC1952.12c	YES_32	1.027	1.024	0.000933497	0.00143787
SPCC1322.09	YES_32	1.019	1.018	0.000436988	0.000696374
SPAC21E11.03c	YES_32	1.032	1.029	0.0268375	0.0351295
SPAC1952.15c	YES_32	1.018	1.011	3.91582e-07	8.12153e-07
SPAC25B8.15c	YES_32	1.016	1.011	1.88194e-09	4.76869e-09
SPCC622.19	YES_32	1.025	1.018	0.000187504	0.000310332
SPAC5H10.12c	YES_32	1.022	1.017	0.000371325	0.000596662
SPCC4G3.08	YES_32	1.015	1.011	9.83314e-06	1.82188e-05
SPAC5H10.05c	YES_32	1.01	0.999	3.41367e-05	6.03209e-05
SPBC1711.08	YES_32	1.015	1.009	0.00115345	0.00176214
SPBC1289.13c	YES_32	1.089	1.098	3.24241e-07	6.76525e-07
SPAC18G6.01c	YES_32	1	0.995	1.727e-11	5.29533e-11
SPAC2G11.15c	YES_32	1.05	1.048	0.263775	0.298876
SPCC126.15c	YES_32	0.974	0.98	6.22678e-11	1.82086e-10
SPAC3G9.11c	YES_32	0.974	0.973	9.4139e-26	1.47315e-24
SPAC4G9.19	YES_32	1.063	1.059	0.00806935	0.0113173
SPAC6G9.01c	YES_32	1.027	1.016	0.00698767	0.00983995
SPBC16C6.04	YES_32	0.969	0.97	7.73599e-19	4.96762e-18
SPAC13G6.03	YES_32	1.023	1.025	0.0017271	0.00258506
SPBC4F6.10	YES_32	0.946	0.953	1.63029e-14	6.7264e-14
SPCC663.11	YES_32	0.927	0.916	3.80069e-19	2.52942e-18
SPAC644.13c	YES_32	1.002	0.997	9.88571e-11	2.83358e-10
SPAC31G5.03	YES_32	0.402	0.396	2.31139e-56	1.3383e-53
SPAC17C9.14	YES_32	0.907	0.9	4.77334e-36	2.59103e-34
SPBC1706.03	YES_32	1.009	1.002	3.6585e-09	8.99478e-09
SPBC18H10.11c	YES_32	0.787	0.848	3.17385e-14	1.27615e-13
SPBC8D2.11	YES_32	0.986	0.988	9.6645e-23	1.03306e-21
SPBC725.02	YES_32	0.646	0.643	8.44191e-40	9.46039e-38
SPAC186.03	YES_32	1.003	0.999	8.60362e-12	2.70734e-11
SPCC320.12	YES_32	1.016	1.021	9.22162e-09	2.17783e-08
SPBC1347.11	YES_32	1.037	1.035	0.185717	0.217086
SPBC1604.16c	YES_32	0.977	0.974	4.62132e-24	5.75428e-23
SPAC19A8.08	YES_32	1.138	1.12	6.85208e-13	2.41421e-12
SPAC1687.07	YES_32	1.028	1.027	0.0211069	0.0280833
SPCC24B10.16c	YES_32	0.919	0.914	1.37372e-26	2.48434e-25
SPBC16C6.09	YES_32	0.668	0.614	7.07852e-21	5.96863e-20
SPBC1289.11	YES_32	0.947	0.957	3.81965e-24	4.87848e-23
SPBC28F2.05c	YES_32	1.032	1.032	0.0364097	0.0468125
SPCC285.17	YES_32	1.014	1.021	0.000201178	0.000332332
SPCC830.04c	YES_32	1.036	1.026	0.147934	0.176061
SPBC839.13c	YES_32	0.841	0.853	2.57274e-22	2.66083e-21
SPCC1494.01	YES_32	1.051	1.047	0.302151	0.339042
SPAC23G3.04	YES_32	1.011	1.001	3.39504e-05	6.00223e-05
SPCC1442.11c	YES_32	1.045	1.042	0.947962	0.959284
SPCC16C4.10	YES_32	0.859	0.855	1.26888e-21	1.16616e-20
SPCC4G3.02	YES_32	1.013	1.01	1.18238e-08	2.76792e-08
SPAC25H1.09	YES_32	1.027	1.024	0.000728942	0.00113609
SPAC16C9.01c	YES_32	1.04	1.039	0.308164	0.345565
SPBC1289.01c	YES_32	0.946	0.946	4.85621e-29	1.15551e-27
SPAC10F6.17c	YES_32	1.032	1.028	0.15245	0.181001
SPAC227.04	YES_32	1.037	1.032	0.16083	0.190292
SPCC1739.14	YES_32	0.907	0.918	1.32783e-19	9.41404e-19
SPAC15A10.15	YES_32	1.039	1.031	0.430022	0.469484
SPAC4C5.02c	YES_32	0.433	0.437	1.44407e-43	2.38891e-41
SPAC17G6.06	YES_32	0.83	0.829	4.4436e-35	2.08338e-33
SPBC83.03c	YES_32	0.797	0.793	1.25373e-43	2.29235e-41
SPCC1020.01c	YES_32	0.975	0.999	1.52783e-11	4.71794e-11
SPBC839.05c	YES_32	0.465	0.502	9.66566e-38	6.85671e-36
SPAC18B11.04	YES_32	1.129	1.123	3.28556e-19	2.19923e-18
SPAC13F5.05	YES_32	1.05	1.049	0.318587	0.356078
SPCC24B10.12	YES_32	0.955	0.956	1.87869e-17	1.05098e-16
SPAC10F6.12c	YES_32	0.978	0.983	1.49674e-13	5.64567e-13
SPCC584.11c	YES_32	0.357	0.362	3.30668e-56	1.64106e-53
SPAC17G8.14c	YES_32	1.054	1.046	0.201909	0.234828
SPAC19A8.14	YES_32	1.071	1.071	0.000522105	0.000825954
SPAC5H10.02c	YES_32	1.054	1.055	0.11058	0.134273
SPAC2G11.09	YES_32	1.045	1.046	0.830381	0.855753
SPBC146.02	YES_32	1.01	1.009	3.09539e-09	7.6755e-09
SPAC1F5.05c	YES_32	0.814	0.83	8.08593e-27	1.48627e-25
SPCC757.12	YES_32	1.048	1.047	0.473082	0.512149
SPBC2G5.03	YES_32	0.947	0.938	1.93437e-19	1.33865e-18
SPAC23H3.14	YES_32	1.068	1.075	0.000563504	0.000887806
SPAC227.15	YES_32	1.028	1.021	0.0734929	0.0915434
SPCC663.09c	YES_32	1.051	1.048	0.398012	0.437474
SPCC1322.16	YES_32	1.043	1.051	0.935195	0.948298
SPCC16A11.10c	YES_32	0.924	0.91	9.26964e-11	2.67243e-10
SPBC32F12.11	YES_32	0.924	0.943	1.55389e-18	9.76166e-18
SPAC2H10.02c	YES_32	1.038	1.028	0.307265	0.344668
SPBC1271.08c	YES_32	1.041	1.036	0.525831	0.563982
SPAC1805.04	YES_32	0.909	0.909	3.25206e-29	7.8456e-28
SPBC947.01	YES_32	1.012	1.016	8.65495e-09	2.05237e-08
SPBC29A10.11c	YES_32	1.057	1.059	0.0153025	0.0207822
SPAC3C7.10	YES_32	0.96	0.958	3.10887e-19	2.08902e-18
SPCC306.05c	YES_32	0.988	0.986	5.24254e-13	1.87325e-12
SPBC530.04	YES_32	0.98	0.98	1.97487e-16	9.67658e-16
[truncated: 4,970 more rows]

## Sheet: Fitness all conditions
gene_id	condition	fitness_mean	fitness_median	effect_size	effect_size_mean	effect_size_median	p_value	p_corrected
SPBC29A3.09c	YES_glucose_0.1percent_32C_10days	0.964	0.964	-0.126	-0.088	-0.088	NaN	NaN
SPAPB2B4.06	YES_glucose_0.1percent_32C_10days	0.989	0.996	-0.17	-0.129	-0.119	0.0886924	0.699234
SPAC4H3.03c	YES_glucose_0.1percent_32C_10days	0.903	0.922	-0.202	-0.113	-0.081	0.461516	0.843112
SPBC1539.10	YES_glucose_0.1percent_32C_10days	0.995	0.95	0.273	0.095	0.034	0.570484	0.870601
SPAC977.17	YES_glucose_0.1percent_32C_10days	1.05	1.028	0.132	0.057	0.028	0.379317	0.803184
SPBC337.03	YES_glucose_0.1percent_32C_10days	1.092	1.058	0.239	0.111	0.068	0.391933	0.808007
SPBC1711.15c	YES_glucose_0.1percent_32C_10days	1.026	1.026	0.062	0.011	0.011	0.756888	0.934659
SPBC15D4.10c	YES_glucose_0.1percent_32C_10days	0.951	0.983	0.18	0.113	0.164	0.376801	0.801541
SPBC3H7.13	YES_glucose_0.1percent_32C_10days	1.133	1.146	0.197	0.167	0.183	0.0319588	0.681601
SPBC29A10.12	YES_glucose_0.1percent_32C_10days	1.068	1.044	0.067	0.002	-0.031	0.519527	0.854284
SPBC23G7.04c	YES_glucose_0.1percent_32C_10days	0.81	0.753	-0.585	-0.322	-0.405	0.205488	0.760257
SPBC557.04	YES_glucose_0.1percent_32C_10days	1.045	1.045	0.054	0.024	0.024	0.950899	0.98654
SPBC365.06	YES_glucose_0.1percent_32C_10days	0.901	0.894	-0.151	-0.107	-0.118	0.0309001	0.681601
SPBC3E7.08c	YES_glucose_0.1percent_32C_10days	0.956	0.977	-0.12	-0.038	-0.006	0.574745	0.870601
SPBC8D2.02c	YES_glucose_0.1percent_32C_10days	0.958	0.971	-0.144	-0.103	-0.082	0.622632	0.892454
SPBP8B7.18c	YES_glucose_0.1percent_32C_10days	0.954	0.949	0.065	0.049	0.041	0.507654	0.854188
SPBC902.02c	YES_glucose_0.1percent_32C_10days	0.978	0.978	0.165	0.114	0.115	0.246231	0.768185
SPBPB8B6.04c	YES_glucose_0.1percent_32C_10days	1.079	1.073	0.024	0	-0.007	0.233641	0.768185
SPCC18B5.07c	YES_glucose_0.1percent_32C_10days	0.978	0.988	0.184	0.072	0.091	0.855834	0.963765
SPBP4H10.16c	YES_glucose_0.1percent_32C_10days	1.226	1.237	0.231	0.172	0.186	0.141054	0.738064
SPCC576.01c	YES_glucose_0.1percent_32C_10days	1.035	1.041	0.198	0.098	0.108	0.294295	0.786121
SPCC970.02	YES_glucose_0.1percent_32C_10days	1.088	1.124	0.261	0.054	0.115	0.348085	0.798753
SPAC22F3.06c	YES_glucose_0.1percent_32C_10days	0.833	0.834	-0.48	-0.273	-0.262	0.312301	0.794389
SPBC23G7.12c	YES_glucose_0.1percent_32C_10days	1.075	1.077	-0.103	-0.046	-0.043	0.199307	0.759887
wt	YES_glucose_0.1percent_32C_10days	1.039	1.035	-0.158	-0.008	-0.013	0.894974	0.97905
SPCC126.01c	YES_glucose_0.1percent_32C_10days	0.944	0.935	-0.126	-0.072	-0.084	0.494765	0.852461
SPAC23A1.04c	YES_glucose_0.1percent_32C_10days	0.954	0.954	-0.125	-0.062	-0.061	0.0429746	0.681601
SPBC32H8.02c	YES_glucose_0.1percent_32C_10days	1.002	1.015	-0.189	-0.132	-0.113	0.287706	0.781205
SPBC725.11c	YES_glucose_0.1percent_32C_10days	1.079	1.076	0.299	0.139	0.137	9.97951e-10	3.37008e-06
SPAC24B11.08c	YES_glucose_0.1percent_32C_10days	1.028	1.012	0.16	0.046	0.026	0.854165	0.963754
SPBC582.10c	YES_glucose_0.1percent_32C_10days	0.929	0.917	-0.124	-0.104	-0.122	0.285382	0.781205
SPAC13F5.03c	YES_glucose_0.1percent_32C_10days	1.012	1.01	0.044	0.022	0.02	0.0911393	0.699234
SPAC26H5.02c	YES_glucose_0.1percent_32C_10days	1.02	1.028	-0.127	-0.018	-0.004	0.767622	0.935102
SPBP8B7.10c	YES_glucose_0.1percent_32C_10days	1.046	1.044	0.26	0.192	0.191	0.0178973	0.655279
SPBC29B5.01	YES_glucose_0.1percent_32C_10days	0.322	0.308	-2.662	-0.289	-0.23	0.980449	0.99356
SPAC1D4.02c	YES_glucose_0.1percent_32C_10days	1.099	1.081	0.115	0.045	0.022	0.243387	0.768185
SPAC2F3.15	YES_glucose_0.1percent_32C_10days	0.853	0.89	-0.48	-0.335	-0.27	0.212625	0.760257
SPCC1442.17c	YES_glucose_0.1percent_32C_10days	1.016	1.021	-0.056	-0.04	-0.033	0.130874	0.728628
SPAC1687.15	YES_glucose_0.1percent_32C_10days	1.06	1.072	-0.903	-0.001	0.021	0.316889	0.794389
SPAC27F1.08	YES_glucose_0.1percent_32C_10days	1.003	0.98	0.144	0.043	0.012	0.04773	0.681601
SPAC30D11.13	YES_glucose_0.1percent_32C_10days	0.909	0.858	-0.178	-0.092	-0.171	0.514881	0.854284
SPCC18B5.01c	YES_glucose_0.1percent_32C_10days	1.066	1.082	0.056	0.031	0.053	0.741362	0.930699
SPCC18B5.11c	YES_glucose_0.1percent_32C_10days	1.033	1.029	0.223	-0.007	-0.011	0.947929	0.985523
SPAC5D6.09c	YES_glucose_0.1percent_32C_10days	1.09	1.066	0.219	0.148	0.117	0.0427111	0.681601
SPAC3A11.10c	YES_glucose_0.1percent_32C_10days	1.016	0.996	0.126	0.051	0.023	0.374531	0.801541
SPCPB16A4.03c	YES_glucose_0.1percent_32C_10days	0.94	0.947	-0.083	-0.055	-0.044	0.488054	0.850954
SPBC1198.14c	YES_glucose_0.1percent_32C_10days	1.039	1.031	-0.216	-0.052	-0.061	0.405243	0.814586
SPAP27G11.02	YES_glucose_0.1percent_32C_10days	1.102	1.098	0.127	0.093	0.088	0.571786	0.870601
SPAC3G9.08	YES_glucose_0.1percent_32C_10days	0.948	0.957	0.042	0.022	0.036	0.858922	0.966216
SPAC13G7.05	YES_glucose_0.1percent_32C_10days	1.081	1.078	0.116	0.098	0.095	0.620638	0.892454
SPBC106.10	YES_glucose_0.1percent_32C_10days	0.676	0.681	-0.807	0.174	0.208	5.10091e-07	0.000861288
SPBC1685.07c	YES_glucose_0.1percent_32C_10days	1.083	1.09	0.21	0.137	0.147	0.17857	0.747255
SPCC1183.04c	YES_glucose_0.1percent_32C_10days	1.102	1.102	-0.054	-0.008	-0.008	NaN	NaN
SPAC1142.02c	YES_glucose_0.1percent_32C_10days	0.899	0.949	-0.361	-0.174	-0.091	0.190374	0.755607
SPCC1322.08	YES_glucose_0.1percent_32C_10days	0.976	0.976	-0.158	-0.104	-0.104	NaN	NaN
SPAC12G12.01c	YES_glucose_0.1percent_32C_10days	1.026	1.04	-0.115	-0.07	-0.05	0.509251	0.854188
SPAC16E8.14c	YES_glucose_0.1percent_32C_10days	1.045	1.029	0.094	0.011	-0.011	0.462483	0.843307
SPAC17D4.01	YES_glucose_0.1percent_32C_10days	1.025	1.042	0.072	0.039	0.064	0.576326	0.870601
SPCC330.02	YES_glucose_0.1percent_32C_10days	1	1.024	0.128	0.049	0.087	0.64785	0.897169
SPAC1556.03	YES_glucose_0.1percent_32C_10days	1.083	1.092	0.076	0.051	0.063	0.362508	0.800977
SPAC20H4.04	YES_glucose_0.1percent_32C_10days	1.036	1.019	0.109	0.036	0.014	0.795858	0.946999
SPAC22H10.02	YES_glucose_0.1percent_32C_10days	1.018	1.04	-0.109	0.005	0.039	0.902742	0.980479
SPCC663.04	YES_glucose_0.1percent_32C_10days	1.012	1.012	0.837	0.727	0.727	NaN	NaN
SPAC27D7.11c	YES_glucose_0.1percent_32C_10days	1.003	0.996	-0.112	-0.07	-0.08	0.537265	0.862684
SPAC29A4.17c	YES_glucose_0.1percent_32C_10days	0.988	0.994	-0.072	-0.048	-0.038	0.0763028	0.693022
SPCP1E11.02	YES_glucose_0.1percent_32C_10days	0.984	1.01	-0.148	-0.062	-0.024	0.142618	0.738482
SPAC17A5.01	YES_glucose_0.1percent_32C_10days	1.186	1.209	0.301	0.199	0.23	0.207407	0.760257
SPAC4F10.16c	YES_glucose_0.1percent_32C_10days	1.043	1.044	-0.073	-0.02	-0.018	0.159225	0.738911
SPAC57A10.14	YES_glucose_0.1percent_32C_10days	0.839	0.854	-0.111	-0.034	-0.006	0.788068	0.944395
SPAC13G7.02c	YES_glucose_0.1percent_32C_10days	1.063	1.064	0.03	0.01	0.011	0.0214308	0.662964
SPAC1805.09c	YES_glucose_0.1percent_32C_10days	0.932	0.944	-0.243	-0.176	-0.156	0.6198	0.892454
SPAC821.09	YES_glucose_0.1percent_32C_10days	0.946	0.961	0.18	0.148	0.171	0.0344411	0.681601
SPAC6G9.09c	YES_glucose_0.1percent_32C_10days	0.931	0.922	0.312	0.262	0.249	0.119079	0.728628
SPAC1952.09c	YES_glucose_0.1percent_32C_10days	0.537	0.51	-1.008	-0.923	-0.994	0.00347451	0.578013
SPAC19B12.04	YES_glucose_0.1percent_32C_10days	1.038	1.049	0.081	0.051	0.066	0.519275	0.854284
SPBC1271.09	YES_glucose_0.1percent_32C_10days	1.01	0.999	0.04	-0.001	-0.016	0.0550377	0.681601
SPAC27E2.09	YES_glucose_0.1percent_32C_10days	1.077	1.071	0.178	0.15	0.142	0.500111	0.852537
SPAC1F8.01	YES_glucose_0.1percent_32C_10days	1.091	1.091	0.084	0.078	0.079	0.0853379	0.699234
SPBC1709.13c	YES_glucose_0.1percent_32C_10days	1.046	1.052	0.067	0.034	0.042	0.0449422	0.681601
SPBP4H10.20	YES_glucose_0.1percent_32C_10days	1.043	1.043	0.069	0.029	0.029	0.496002	0.852537
SPAC513.02	YES_glucose_0.1percent_32C_10days	1.067	0.985	0.327	0.105	-0.001	0.471471	0.847465
SPAC23D3.12	YES_glucose_0.1percent_32C_10days	1.067	1.017	0.168	0.021	-0.045	0.673351	0.901638
SPBC146.04	YES_glucose_0.1percent_32C_10days	0.996	0.994	-0.096	-0.078	-0.08	0.120278	0.728628
SPAC5H10.11	YES_glucose_0.1percent_32C_10days	0.986	1.001	0.117	0.016	0.04	0.753076	0.934399
SPAC31G5.12c	YES_glucose_0.1percent_32C_10days	1.056	1.054	0.112	0.076	0.073	0.0452621	0.681601
SPAC6B12.04c	YES_glucose_0.1percent_32C_10days	0.991	1.006	-0.066	-0.002	0.02	0.884561	0.975878
SPAC458.04c	YES_glucose_0.1percent_32C_10days	1.05	1.024	0.1	0.024	-0.011	0.337885	0.798753
SPBC1703.14c	YES_glucose_0.1percent_32C_10days	0.965	0.959	0.079	0.043	0.034	0.612214	0.888669
SPAC821.07c	YES_glucose_0.1percent_32C_10days	1.127	1.096	0.175	0.045	0.008	0.364849	0.801541
SPAPB1A10.12c	YES_glucose_0.1percent_32C_10days	1.047	1.048	0.137	0.071	0.073	0.577796	0.87069
SPBC17A3.06	YES_glucose_0.1percent_32C_10days	0.976	0.97	-0.089	-0.025	-0.033	0.174064	0.744526
SPAC8C9.12c	YES_glucose_0.1percent_32C_10days	0.978	0.988	-0.051	-0.019	-0.005	0.0450057	0.681601
SPBC16E9.12c	YES_glucose_0.1percent_32C_10days	0.942	0.916	0.231	0.131	0.093	0.0350441	0.681601
SPBC19F5.01c	YES_glucose_0.1percent_32C_10days	1.063	1.069	0.091	0.028	0.038	0.391505	0.808007
SPAC9G1.05	YES_glucose_0.1percent_32C_10days	0.958	0.943	0.116	0.025	0.004	0.555937	0.870601
SPBC3B9.09	YES_glucose_0.1percent_32C_10days	0.968	0.973	-0.074	-0.049	-0.041	0.174806	0.744526
SPBC21B10.03c	YES_glucose_0.1percent_32C_10days	0.824	0.776	-0.25	-0.086	-0.161	0.355865	0.798753
SPBC543.03c	YES_glucose_0.1percent_32C_10days	0.96	0.958	0.118	0.072	0.07	0.01713	0.655279
SPBC25B2.04c	YES_glucose_0.1percent_32C_10days	0.768	0.809	-0.526	-0.301	-0.217	0.286141	0.781205
SPBC29A3.13	YES_glucose_0.1percent_32C_10days	1.056	1.056	-0.034	-0.02	-0.02	NaN	NaN
SPAC589.02c	YES_glucose_0.1percent_32C_10days	0.863	0.863	0.23	0.23	0.23	NaN	NaN
SPBC31F10.12	YES_glucose_0.1percent_32C_10days	0.908	0.93	0.212	0.102	0.141	0.623543	0.892768
SPBC15D4.02	YES_glucose_0.1percent_32C_10days	0.792	0.79	-0.71	-0.341	-0.316	0.282383	0.780928
SPAC9G1.06c	YES_glucose_0.1percent_32C_10days	0.954	0.954	0.049	0.043	0.043	0.0948238	0.705125
SPBC337.04	YES_glucose_0.1percent_32C_10days	1.081	1.08	0.104	0.046	0.045	0.101292	0.719031
SPBC18E5.14c	YES_glucose_0.1percent_32C_10days	0.816	0.814	-0.29	-0.25	-0.252	0.274983	0.780928
SPBC4.05	YES_glucose_0.1percent_32C_10days	0.998	1.001	-0.068	-0.052	-0.048	0.0745323	0.693022
SPBC23G7.13c	YES_glucose_0.1percent_32C_10days	0.818	0.769	-0.489	-0.274	-0.347	0.415948	0.821436
SPBC56F2.03	YES_glucose_0.1percent_32C_10days	1.043	1.046	0.144	0.017	0.025	0.975728	0.993424
SPBC3B9.05	YES_glucose_0.1percent_32C_10days	1.013	0.982	-0.099	-0.05	-0.093	0.0647016	0.683331
SPBC3E7.12c	YES_glucose_0.1percent_32C_10days	0.986	0.986	-0.108	-0.04	-0.039	0.0730434	0.693022
SPBC6B1.02	YES_glucose_0.1percent_32C_10days	1.099	1.092	0.095	0.069	0.06	0.352498	0.798753
SPBC947.14c	YES_glucose_0.1percent_32C_10days	1.056	1.071	0.078	0.054	0.074	0.254959	0.770111
SPBPB10D8.01	YES_glucose_0.1percent_32C_10days	1.019	1.025	0.053	0.031	0.039	0.927042	0.985379
SPBC9B6.03	YES_glucose_0.1percent_32C_10days	1.073	1.075	0.044	0.027	0.03	0.23639	0.768185
SPBPB8B6.05c	YES_glucose_0.1percent_32C_10days	1.108	1.132	0.077	0.027	0.059	0.0782197	0.697535
SPCC191.11	YES_glucose_0.1percent_32C_10days	1.049	1.082	-0.084	0.014	0.061	0.303395	0.788544
SPBP8B7.06	YES_glucose_0.1percent_32C_10days	0.872	0.916	0.184	0.082	0.159	0.145289	0.738482
SPCC74.05	YES_glucose_0.1percent_32C_10days	0.845	0.883	0.152	0.066	0.133	0.219458	0.761406
SPCP1E11.05c	YES_glucose_0.1percent_32C_10days	0.97	0.964	0.119	0.074	0.065	0.0884702	0.699234
SPAC22F3.08c	YES_glucose_0.1percent_32C_10days	0.96	0.853	0.365	0.002	-0.145	0.751663	0.93412
SPBC24C6.04	YES_glucose_0.1percent_32C_10days	1.004	1.004	-0.062	-0.039	-0.039	0.691173	0.908561
SPCC1393.09c	YES_glucose_0.1percent_32C_10days	1.17	1.06	0.42	0.106	-0.018	0.652549	0.897169
SPAC23A1.07	YES_glucose_0.1percent_32C_10days	1.273	1.267	0.478	0.433	0.427	0.00249853	0.578013
SPBC337.11	YES_glucose_0.1percent_32C_10days	1.007	1.007	-0.062	-0.059	-0.059	0.990972	0.996337
SPAC24B11.12c	YES_glucose_0.1percent_32C_10days	1.018	1.017	0.076	0.021	0.021	0.73024	0.926775
SPBC646.08c	YES_glucose_0.1percent_32C_10days	1.031	1.055	-0.132	-0.035	-0.001	0.391175	0.808007
SPAC14C4.12c	YES_glucose_0.1percent_32C_10days	1.038	1.007	0.223	0.122	0.08	0.0141208	0.655279
SPAC27D7.02c	YES_glucose_0.1percent_32C_10days	0.991	0.993	-0.064	-0.037	-0.035	0.311932	0.794389
SPBPB7E8.01	YES_glucose_0.1percent_32C_10days	0.984	0.995	0.103	0.056	0.073	0.836311	0.959321
SPAC1D4.03c	YES_glucose_0.1percent_32C_10days	1.004	0.996	0.079	0.007	-0.004	0.376863	0.801541
SPAC2F3.16	YES_glucose_0.1percent_32C_10days	0.986	0.957	-0.093	-0.045	-0.086	0.977645	0.99356
SPCC1450.02	YES_glucose_0.1percent_32C_10days	0.952	0.973	-0.136	-0.025	0.009	0.77859	0.940043
SPAC29B12.05c	YES_glucose_0.1percent_32C_10days	1.035	1.036	-0.026	-0.005	-0.003	0.591312	0.87697
SPAC31A2.16	YES_glucose_0.1percent_32C_10days	1.005	1.009	-0.038	0.002	0.008	0.368092	0.801541
SPCC18B5.03	YES_glucose_0.1percent_32C_10days	1.09	1.073	0.13	0.075	0.053	0.0283231	0.681601
SPAC5H10.09c	YES_glucose_0.1percent_32C_10days	1.102	1.102	0.12	0.116	0.116	0.605803	0.883332
SPAC3A12.03c	YES_glucose_0.1percent_32C_10days	1.089	1.086	0.101	0.077	0.074	0.903152	0.980479
SPCPB1C11.02	YES_glucose_0.1percent_32C_10days	1.072	1.07	0.102	0.045	0.044	0.716652	0.920996
SPAP27G11.14c	YES_glucose_0.1percent_32C_10days	0.725	0.693	-0.476	-0.378	-0.438	0.652536	0.897169
SPAC3H1.05	YES_glucose_0.1percent_32C_10days	0.943	0.925	0.085	0.014	-0.013	0.554624	0.870336
SPAC13G7.13c	YES_glucose_0.1percent_32C_10days	0.963	0.963	-0.095	0.001	0.004	0.981546	0.99361
SPBC16A3.14	YES_glucose_0.1percent_32C_10days	1.036	1.022	-0.052	-0.026	-0.045	0.558613	0.870601
SPAC1002.20	YES_glucose_0.1percent_32C_10days	1.04	1.017	0.179	0.028	0	0.437715	0.832421
SPCC11E10.07c	YES_glucose_0.1percent_32C_10days	0.906	0.906	-0.251	-0.202	-0.202	0.22755	0.765348
SPAC11D3.07c	YES_glucose_0.1percent_32C_10days	1.031	1.031	-0.075	-0.075	-0.075	NaN	NaN
SPAC11D3.09	YES_glucose_0.1percent_32C_10days	0.869	1.027	-0.99	-0.355	-0.049	0.30789	0.791444
SPAC1527.02	YES_glucose_0.1percent_32C_10days	0.849	0.853	-0.19	-0.144	-0.136	0.0904214	0.699234
SPCC1442.14c	YES_glucose_0.1percent_32C_10days	1.002	1.006	0.018	0.008	0.014	0.528279	0.858517
SPAC12G12.07c	YES_glucose_0.1percent_32C_10days	1.052	1.068	-0.121	-0.065	-0.042	0.0903842	0.699234
SPAC17G8.09	YES_glucose_0.1percent_32C_10days	1.062	1.066	-0.037	-0.009	-0.004	0.076355	0.693022
SPCC330.07c	YES_glucose_0.1percent_32C_10days	1.037	1.033	-0.041	-0.008	-0.013	0.536816	0.862431
SPAC1565.07c	YES_glucose_0.1percent_32C_10days	1.119	1.089	0.231	0.148	0.111	0.0489682	0.681601
SPAC222.07c	YES_glucose_0.1percent_32C_10days	1.012	1.005	0.052	0.005	-0.004	0.793185	0.945829
SPAC23A1.03	YES_glucose_0.1percent_32C_10days	0.997	0.992	0.07	0.03	0.023	0.870309	0.97006
SPCC70.06	YES_glucose_0.1percent_32C_10days	1.062	1.067	-0.022	0.003	0.009	0.115313	0.728628
SPAC16A10.02	YES_glucose_0.1percent_32C_10days	1.012	1.012	-0.02	-0.018	-0.018	0.779549	0.940528
SPAC29B12.10c	YES_glucose_0.1percent_32C_10days	1.012	1.009	0.082	0.063	0.058	0.74113	0.930699
SPAC2C4.05	YES_glucose_0.1percent_32C_10days	0.936	0.942	0.112	0.087	0.097	0.604685	0.882464
SPCP1E11.10	YES_glucose_0.1percent_32C_10days	0.973	0.961	0.07	-0.007	-0.023	0.957216	0.988001
SPAC17A5.11	YES_glucose_0.1percent_32C_10days	1.045	1.053	-0.14	-0.028	-0.014	0.827818	0.956722
SPAC4G8.13c	YES_glucose_0.1percent_32C_10days	0.666	0.617	0.324	0.053	-0.044	NaN	NaN
SPAC589.11	YES_glucose_0.1percent_32C_10days	0.985	0.989	-0.048	-0.027	-0.02	0.370537	0.801541
SPAC1420.01c	YES_glucose_0.1percent_32C_10days	0.915	0.939	-0.273	-0.165	-0.126	0.176971	0.74704
SPAC1805.12c	YES_glucose_0.1percent_32C_10days	0.972	0.969	0.234	0.169	0.165	0.193289	0.756356
SPAC8F11.08c	YES_glucose_0.1percent_32C_10days	1.001	0.976	0.3	0.024	0.004	0.90556	0.980479
SPAC750.08c	YES_glucose_0.1percent_32C_10days	1.035	1.04	0.057	0.029	0.035	0.936897	0.985379
SPAC19A8.05c	YES_glucose_0.1percent_32C_10days	1.007	1.022	-0.092	-0.022	0	0.954387	0.988001
SPAC19B12.07c	YES_glucose_0.1percent_32C_10days	1.116	1.112	0.098	0.041	0.037	0.52985	0.859602
SPBC1271.14	YES_glucose_0.1percent_32C_10days	1.053	1.032	0.131	0.062	0.033	0.783402	0.943154
SPAPB17E12.03	YES_glucose_0.1percent_32C_10days	1.136	1.098	0.384	0.28	0.233	0.31864	0.794389
SPAC29A4.11	YES_glucose_0.1percent_32C_10days	0.967	0.939	-0.123	-0.064	-0.104	0.357725	0.798967
SPAC20G8.08c	YES_glucose_0.1percent_32C_10days	0.993	0.962	-0.095	-0.036	-0.08	0.793135	0.945829
SPBC1711.05	YES_glucose_0.1percent_32C_10days	0.672	0.712	-0.706	-0.486	-0.393	0.0435848	0.681601
SPAC4F10.02	YES_glucose_0.1percent_32C_10days	1.07	1.082	0.139	0.083	0.099	0.15135	0.738482
SPAC17H9.19c	YES_glucose_0.1percent_32C_10days	0.959	0.959	-0.13	-0.029	-0.029	0.580443	0.872071
SPBC1215.01	YES_glucose_0.1percent_32C_10days	0.567	0.51	-0.987	-0.783	-0.915	0.226873	0.765348
SPAC521.02	YES_glucose_0.1percent_32C_10days	1.022	1.022	0.112	0.074	0.074	NaN	NaN
SPAC23H4.08	YES_glucose_0.1percent_32C_10days	1.049	1.032	0.124	0.043	0.02	0.565073	0.870601
SPAC630.09c	YES_glucose_0.1percent_32C_10days	0.978	0.96	0.074	0.004	-0.022	0.426169	0.829269
SPAC323.05c	YES_glucose_0.1percent_32C_10days	0.891	0.888	-0.165	-0.127	-0.132	0.0186694	0.655279
SPBC16D10.08c	YES_glucose_0.1percent_32C_10days	1.017	1.007	-0.061	-0.025	-0.038	0.245553	0.768185
SPAC6B12.07c	YES_glucose_0.1percent_32C_10days	0.946	0.95	-0.137	-0.054	-0.046	0.238628	0.768185
SPAC57A7.08	YES_glucose_0.1percent_32C_10days	0.997	1.016	-0.135	-0.072	-0.044	0.0755838	0.693022
SPAC823.03	YES_glucose_0.1percent_32C_10days	0.894	0.902	-0.214	-0.092	-0.076	0.188563	0.755607
SPBC17A3.10	YES_glucose_0.1percent_32C_10days	1.197	1.243	0.426	0.295	0.356	0.0855134	0.699234
SPAC8E11.02c	YES_glucose_0.1percent_32C_10days	0.9	0.898	0.547	0.501	0.498	0.0268697	0.681601
SPBC16E9.17c	YES_glucose_0.1percent_32C_10days	1.026	1.033	-0.077	-0.01	0	0.185107	0.749529
SPBC19F8.04c	YES_glucose_0.1percent_32C_10days	1.036	1.037	0.032	0.016	0.017	0.130078	0.728628
SPAC9G1.10c	YES_glucose_0.1percent_32C_10days	0.988	0.986	-0.044	-0.015	-0.018	0.944053	0.985379
SPBC4.06	YES_glucose_0.1percent_32C_10days	1.028	1.048	-0.063	0.005	0.034	0.251383	0.768185
SPBC106.02c	YES_glucose_0.1percent_32C_10days	0.992	0.979	0.071	0.015	-0.004	0.371432	0.801541
SPBC56F2.06	YES_glucose_0.1percent_32C_10days	0.968	0.934	0.089	-0.024	-0.073	0.997246	0.998133
SPBC25D12.06	YES_glucose_0.1percent_32C_10days	0.588	0.756	-1.846	-0.664	-0.098	0.641544	0.897169
SPBC29A3.18	YES_glucose_0.1percent_32C_10days	0.938	0.938	-0.149	-0.115	-0.115	0.287826	0.781205
SPAPB8E5.02c	YES_glucose_0.1percent_32C_10days	0.998	1.009	-0.083	-0.048	-0.032	0.90453	0.980479
SPAC630.13c	YES_glucose_0.1percent_32C_10days	0.999	1.09	0.347	0.2	0.34	0.502243	0.853799
SPBC31F10.16	YES_glucose_0.1percent_32C_10days	1.034	1.038	0.109	0.051	0.058	0.131471	0.728628
SPBC15D4.06	YES_glucose_0.1percent_32C_10days	1.044	1.035	0.085	0.032	0.02	0.0636963	0.683331
SPAPB1E7.05	YES_glucose_0.1percent_32C_10days	0.991	0.987	-0.05	-0.033	-0.038	0.224643	0.763342
SPBC342.05	YES_glucose_0.1percent_32C_10days	1.026	1.028	0.032	0.001	0.004	0.212955	0.760257
SPBC18H10.07	YES_glucose_0.1percent_32C_10days	0.841	0.846	-0.293	-0.176	-0.165	0.0251286	0.662964
SPBC1685.13	YES_glucose_0.1percent_32C_10days	1.037	1.034	0.074	0.059	0.055	0.00612874	0.578013
SPBC409.19c	YES_glucose_0.1percent_32C_10days	0.897	0.887	-0.204	-0.181	-0.197	0.0715475	0.693022
SPBC29B5.03c	YES_glucose_0.1percent_32C_10days	1.001	1.026	-0.063	0.01	0.046	0.166319	0.742625
SPBC26H8.03	YES_glucose_0.1percent_32C_10days	0.931	0.919	0.091	-0.002	-0.019	0.843954	0.96163
SPBC577.03c	YES_glucose_0.1percent_32C_10days	0.993	0.963	-0.089	-0.034	-0.076	0.594991	0.87908
SPBC3D6.09	YES_glucose_0.1percent_32C_10days	1.038	1.039	0.137	0.11	0.111	0.293126	0.785624
SPBC3H7.03c	YES_glucose_0.1percent_32C_10days	0.713	0.793	-0.75	-0.334	-0.152	0.598224	0.880358
SPBC713.11c	YES_glucose_0.1percent_32C_10days	1.082	1.08	0.1	0.039	0.037	0.692137	0.908899
SPBCPT2R1.02	YES_glucose_0.1percent_32C_10days	1.048	1.068	0.061	0.015	0.043	0.492112	0.851263
SPBPB2B2.13	YES_glucose_0.1percent_32C_10days	0.957	0.965	-0.084	-0.051	-0.038	0.28237	0.780928
SPBC9B6.07	YES_glucose_0.1percent_32C_10days	0.681	0.685	-0.317	-0.105	-0.087	0.794502	0.946396
SPBPJ4664.02	YES_glucose_0.1percent_32C_10days	1.087	1.062	0.116	0	-0.031	0.411634	0.819006
SPBP8B7.23	YES_glucose_0.1percent_32C_10days	1.063	1.036	0.152	0.041	0.005	0.895397	0.979196
SPCC794.15	YES_glucose_0.1percent_32C_10days	0.92	0.932	-0.222	0.01	0.039	0.582678	0.872991
SPCP1E11.06	YES_glucose_0.1percent_32C_10days	0.734	0.645	-0.577	-0.363	-0.524	0.286393	0.781205
SPAC22F3.12c	YES_glucose_0.1percent_32C_10days	1.09	1.098	0.083	0.063	0.074	0.0294823	0.681601
SPBC24C6.06	YES_glucose_0.1percent_32C_10days	0.904	1.036	-0.684	-0.218	0.013	0.480389	0.848914
SPBC1105.14	YES_glucose_0.1percent_32C_10days	0.967	0.967	-0.522	0.022	0.031	0.64529	0.897169
SPCC1450.16c	YES_glucose_0.1percent_32C_10days	0.997	1.011	0.055	0.019	0.04	0.108165	0.722422
SPAC23C11.14	YES_glucose_0.1percent_32C_10days	1.087	1.101	0.098	0.068	0.087	0.529307	0.859602
SPBC354.05c	YES_glucose_0.1percent_32C_10days	0.889	0.889	0.558	0.414	0.414	NaN	NaN
SPCC63.14	YES_glucose_0.1percent_32C_10days	1.028	1.044	0.04	0.015	0.039	0.627702	0.895364
SPAC24C9.08	YES_glucose_0.1percent_32C_10days	1.009	1.038	-0.111	-0.009	0.033	0.736598	0.927749
SPBC713.07c	YES_glucose_0.1percent_32C_10days	0.947	0.993	-0.197	0.003	0.079	0.332249	0.797006
SPAC15A10.05c	YES_glucose_0.1percent_32C_10days	1.057	1.038	0.112	0.05	0.025	0.583063	0.872991
SPAC27D7.13c	YES_glucose_0.1percent_32C_10days	1.038	1.05	0.069	0.023	0.041	0.373305	0.801541
SPCC1020.10	YES_glucose_0.1percent_32C_10days	1.087	1.082	0.019	0	-0.006	0.330456	0.797006
SPAC1D4.06c	YES_glucose_0.1percent_32C_10days	0.97	0.955	0.137	0.062	0.041	0.581148	0.872071
SPAC2F7.08c	YES_glucose_0.1percent_32C_10days	0.891	0.895	0.266	0.222	0.229	0.0389212	0.681601
SPCC1620.07c	YES_glucose_0.1percent_32C_10days	0.983	0.982	-0.06	-0.034	-0.034	0.826432	0.955774
SPAC31A2.11c	YES_glucose_0.1percent_32C_10days	0.832	0.786	-0.305	-0.213	-0.29	0.27215	0.780928
SPAC31G5.19	YES_glucose_0.1percent_32C_10days	0.904	0.913	-0.083	-0.031	-0.017	0.0727633	0.693022
SPAC5H10.13c	YES_glucose_0.1percent_32C_10days	1.02	1.001	0.085	-0.005	-0.031	0.306023	0.790695
SPAC3A12.06c	YES_glucose_0.1percent_32C_10days	0.994	1.017	-0.156	-0.046	-0.01	0.560502	0.870601
SPAC1071.05	YES_glucose_0.1percent_32C_10days	0.987	0.973	0.089	-0.003	-0.022	0.409016	0.818275
SPAPB1A10.05	YES_glucose_0.1percent_32C_10days	1	0.994	0.039	0.005	-0.004	0.727509	0.926068
SPAC3H1.06c	YES_glucose_0.1percent_32C_10days	1.077	1.064	0.06	0.016	-0.001	0.5768	0.870601
SPAC1486.02c	YES_glucose_0.1percent_32C_10days	0.972	0.972	0.446	0.446	0.446	NaN	NaN
SPBC16D10.07c	YES_glucose_0.1percent_32C_10days	0.99	0.99	-0.076	-0.036	-0.036	0.67433	0.901638
SPCC11E10.08	YES_glucose_0.1percent_32C_10days	1.116	1.116	0.06	0.043	0.043	0.966561	0.990941
SPAC11H11.03c	YES_glucose_0.1percent_32C_10days	1.067	1.093	-0.064	0.013	0.049	0.879299	0.973421
SPAC15E1.06	YES_glucose_0.1percent_32C_10days	0.944	0.952	-0.272	-0.074	-0.053	0.472245	0.847465
SPCC1450.05c	YES_glucose_0.1percent_32C_10days	0.828	0.828	-0.157	-0.066	-0.066	NaN	NaN
SPAC12G12.12	YES_glucose_0.1percent_32C_10days	1.15	1.144	0.185	0.079	0.075	0.260396	0.774747
SPAC1805.14	YES_glucose_0.1percent_32C_10days	0.969	0.964	0.331	0.157	0.157	0.592169	0.877855
SPAC1805.08	YES_glucose_0.1percent_32C_10days	1.05	1.051	0.043	0.031	0.032	0.00394377	0.578013
SPCC338.11c	YES_glucose_0.1percent_32C_10days	1.057	1.057	0.039	0.007	0.006	0.0787767	0.698578
SPAC15A10.06	YES_glucose_0.1percent_32C_10days	1.13	1.124	0.172	0.099	0.092	0.801097	0.948232
SPAC222.13c	YES_glucose_0.1percent_32C_10days	1.017	1.034	-0.095	-0.035	-0.01	0.448346	0.836037
SPAC23A1.11	YES_glucose_0.1percent_32C_10days	0.849	0.841	0.156	0.099	0.086	0.322118	0.794389
SPAC30C2.04	YES_glucose_0.1percent_32C_10days	1.011	1.005	0.051	0.002	-0.007	0.473278	0.847465
SPAC2C4.08	YES_glucose_0.1percent_32C_10days	1.049	1.056	0.034	0.006	0.017	0.517473	0.854284
SPAC1002.03c	YES_glucose_0.1percent_32C_10days	1.014	1.007	-0.034	-0.021	-0.031	0.952475	0.987514
SPAC17C9.09c	YES_glucose_0.1percent_32C_10days	1.049	1.04	-0.063	-0.018	-0.03	0.275002	0.780928
SPAC4G9.09c	YES_glucose_0.1percent_32C_10days	1.001	0.976	0.135	0.06	0.024	0.381564	0.804332
SPAC5D6.01	YES_glucose_0.1percent_32C_10days	1.038	1.065	0.15	0.107	0.145	0.868383	0.969752
SPAC16.01	YES_glucose_0.1percent_32C_10days	1.007	1.007	-0.096	-0.089	-0.089	0.339747	0.798753
SPAC1834.03c	YES_glucose_0.1percent_32C_10days	1.124	1.182	-0.118	0.035	0.111	0.900675	0.980479
SPAC9E9.12c	YES_glucose_0.1percent_32C_10days	1.064	1.063	0.077	0.023	0.023	0.445718	0.834363
SPAC823.02	YES_glucose_0.1percent_32C_10days	0.844	0.877	-0.406	-0.238	-0.178	0.15159	0.738482
SPAC19D5.07	YES_glucose_0.1percent_32C_10days	0.999	0.99	-0.09	-0.016	-0.028	0.343949	0.798753
SPAC19B12.08	YES_glucose_0.1percent_32C_10days	1.006	1.01	-0.167	-0.109	-0.103	0.376364	0.801541
SPBC1289.10c	YES_glucose_0.1percent_32C_10days	1.204	1.228	0.384	0.349	0.378	0.121061	0.728628
SPAPB17E12.04c	YES_glucose_0.1percent_32C_10days	1.256	1.3	0.389	0.324	0.376	0.0295937	0.681601
SPAC29E6.10c	YES_glucose_0.1percent_32C_10days	0.979	0.975	-0.03	-0.022	-0.029	0.35958	0.799256
SPAC20H4.02	YES_glucose_0.1percent_32C_10days	0.906	0.906	0.426	0.125	0.125	NaN	NaN
SPAC4F8.10c	YES_glucose_0.1percent_32C_10days	1.007	0.989	0.083	0.012	-0.013	0.852967	0.963025
SPAC186.01	YES_glucose_0.1percent_32C_10days	1.058	1.029	0.09	0.001	-0.037	0.643816	0.897169
SPBC1271.05c	YES_glucose_0.1percent_32C_10days	1.074	1.072	0.054	0.033	0.031	0.374437	0.801541
SPAC521.04c	YES_glucose_0.1percent_32C_10days	1.078	1.063	0.131	0.084	0.063	0.0957919	0.705125
SPAC24H6.10c	YES_glucose_0.1percent_32C_10days	1.104	1.079	0.157	0.08	0.048	0.544012	0.866684
SPBC14F5.07	YES_glucose_0.1percent_32C_10days	1.118	1.119	0.174	0.104	0.106	0.299955	0.788544
SPAC631.01c	YES_glucose_0.1percent_32C_10days	0.874	0.874	-0.087	-0.059	-0.059	NaN	NaN
SPAC343.10	YES_glucose_0.1percent_32C_10days	0.941	0.925	-0.122	-0.024	-0.046	0.250127	0.768185
SPBC16G5.05c	YES_glucose_0.1percent_32C_10days	1.031	1.042	-0.083	-0.014	0.003	0.931895	0.985379
SPAC6C3.08	YES_glucose_0.1percent_32C_10days	0.889	0.919	0.115	0.061	0.111	0.186601	0.751971
SPAC664.07c	YES_glucose_0.1percent_32C_10days	0.958	0.965	0.126	0.061	0.074	0.64497	0.897169
SPBC1709.14	YES_glucose_0.1percent_32C_10days	1.021	1.023	-0.046	-0.029	-0.026	0.443659	0.833303
SPAC823.13c	YES_glucose_0.1percent_32C_10days	0.967	1.002	-0.146	-0.038	0.015	0.721574	0.923014
SPAPB24D3.07c	YES_glucose_0.1percent_32C_10days	1.006	0.995	-0.106	-0.017	-0.031	0.822562	0.955051
SPBC17D1.06	YES_glucose_0.1percent_32C_10days	0.946	0.943	0.109	0.058	0.054	0.0586282	0.681601
SPAC8E11.03c	YES_glucose_0.1percent_32C_10days	1.016	1.02	0.043	0.027	0.033	0.534236	0.862208
SPBC1711.09c	YES_glucose_0.1percent_32C_10days	1.078	1.062	0.104	0.05	0.029	0.617272	0.892454
SPBC19F8.08	YES_glucose_0.1percent_32C_10days	0.956	0.959	0.414	0.404	0.408	0.0782842	0.697535
SPACUNK12.02c	YES_glucose_0.1percent_32C_10days	1.003	1.002	0.014	0	-0.002	0.648333	0.897169
SPBC405.03c	YES_glucose_0.1percent_32C_10days	0.984	0.987	-0.046	-0.03	-0.025	0.731534	0.926775
SPBC649.03	YES_glucose_0.1percent_32C_10days	0.886	0.858	0.097	0.005	-0.039	0.805227	0.949277
SPBC25H2.05	YES_glucose_0.1percent_32C_10days	1.029	1.034	0.084	0.011	0.019	0.685209	0.907266
SPBC2A9.03	YES_glucose_0.1percent_32C_10days	0.927	1.001	-0.564	-0.174	-0.038	0.518855	0.854284
SPAPJ691.03	YES_glucose_0.1percent_32C_10days	0.966	0.962	-0.137	-0.051	-0.056	0.868248	0.969752
SPAC637.11	YES_glucose_0.1percent_32C_10days	0.912	0.945	-0.15	-0.039	0.014	0.288007	0.781205
SPBC32C12.03c	YES_glucose_0.1percent_32C_10days	1.034	1.042	0.042	0.023	0.035	0.509415	0.854188
SPBC1604.09c	YES_glucose_0.1percent_32C_10days	0.971	0.95	0.153	0.079	0.049	0.670092	0.901554
SPAPB1E7.06c	YES_glucose_0.1percent_32C_10days	0.949	0.957	0.046	0.008	0.021	0.472258	0.847465
SPBC342.06c	YES_glucose_0.1percent_32C_10days	0.88	0.87	-0.141	-0.103	-0.119	0.309135	0.792069
SPBC19F8.01c	YES_glucose_0.1percent_32C_10days	0.968	0.952	-0.125	-0.078	-0.101	0.823639	0.955168
SPBC1685.14c	YES_glucose_0.1percent_32C_10days	0.928	0.925	-0.127	-0.105	-0.11	0.287513	0.781205
SPBC428.15	YES_glucose_0.1percent_32C_10days	1.034	1.054	-0.063	0.007	0.035	0.274054	0.780928
SPBC2D10.16	YES_glucose_0.1percent_32C_10days	0.778	0.772	-0.255	-0.239	-0.251	0.23195	0.768185
SPBC27.08c	YES_glucose_0.1percent_32C_10days	0.963	0.974	-0.107	-0.002	0.016	0.357521	0.798967
SPBC577.13	YES_glucose_0.1percent_32C_10days	1.008	1.007	-0.099	-0.032	-0.033	0.570813	0.870601
SPBC4B4.06	YES_glucose_0.1percent_32C_10days	0.956	0.95	-0.088	-0.067	-0.076	0.351454	0.798753
SPBC428.10	YES_glucose_0.1percent_32C_10days	1.055	1.045	0.087	0.051	0.038	0.477008	0.848387
SPBC725.01	YES_glucose_0.1percent_32C_10days	0.962	0.947	0.074	0.009	-0.013	0.301023	0.788544
SPBCPT2R1.08c	YES_glucose_0.1percent_32C_10days	1.035	1.026	0.056	0	-0.013	0.272261	0.780928
SPCC11E10.04	YES_glucose_0.1percent_32C_10days	1.019	1.045	-0.077	0.013	0.052	0.887008	0.9761
SPBC9B6.09c	YES_glucose_0.1percent_32C_10days	1.063	1.06	0.068	0.034	0.03	0.92896	0.985379
SPCC1183.10	YES_glucose_0.1percent_32C_10days	1.163	1.178	0.144	0.097	0.116	0.616937	0.892454
SPCC23B6.04c	YES_glucose_0.1percent_32C_10days	0.928	0.927	-0.096	-0.044	-0.045	0.96605	0.990941
SPBP8B7.25	YES_glucose_0.1percent_32C_10days	0.838	0.821	-0.188	-0.121	-0.149	0.783895	0.943283
SPAC1093.06c	YES_glucose_0.1percent_32C_10days	1.041	1.046	0.057	0.02	0.028	0.042816	0.681601
SPCP25A2.02c	YES_glucose_0.1percent_32C_10days	0.998	1.003	-0.035	-0.006	0.001	0.665143	0.900998
SPBC24C6.09c	YES_glucose_0.1percent_32C_10days	1.124	1.119	0.044	0.02	0.014	0.0189264	0.655279
SPCC1672.03c	YES_glucose_0.1percent_32C_10days	1.03	1.018	0.055	0.015	-0.002	0.650362	0.897169
SPAC23C4.02	YES_glucose_0.1percent_32C_10days	1.052	1.025	0.098	0.001	-0.035	0.334398	0.797502
SPBC365.07c	YES_glucose_0.1percent_32C_10days	1.085	1.101	0.033	0.011	0.033	0.766527	0.935102
SPCC663.08c	YES_glucose_0.1percent_32C_10days	1.056	1.049	0.1	0.025	0.016	0.286586	0.781205
SPAC24C9.14	YES_glucose_0.1percent_32C_10days	1.013	0.991	-0.078	-0.042	-0.074	0.712714	0.920996
SPBC725.07	YES_glucose_0.1percent_32C_10days	1.077	1.048	0.249	0.112	0.076	0.129828	0.728628
SPAC15A10.09c	YES_glucose_0.1percent_32C_10days	1.054	1.063	0.1	0.01	0.025	0.660042	0.899097
SPCC11E10.05c	YES_glucose_0.1percent_32C_10days	1.094	1.09	0.201	0.147	0.143	0.194981	0.75921
SPAC1F12.05	YES_glucose_0.1percent_32C_10days	1.073	1.082	0.08	0.055	0.067	0.497289	0.852537
SPAC2F7.09c	YES_glucose_0.1percent_32C_10days	0.81	0.822	-0.379	-0.337	-0.316	0.138585	0.733065
SPCC16A11.04	YES_glucose_0.1percent_32C_10days	1.023	1.026	0.045	0.018	0.021	0.445704	0.834363
SPAC328.01c	YES_glucose_0.1percent_32C_10days	1.082	1.077	0.155	0.134	0.128	0.00607863	0.578013
SPCC417.12	YES_glucose_0.1percent_32C_10days	1.059	1.021	0.11	-0.011	-0.062	0.499951	0.852537
SPAC630.14c	YES_glucose_0.1percent_32C_10days	0.977	0.989	0.155	0.101	0.121	0.475247	0.847803
SPAC3A12.09c	YES_glucose_0.1percent_32C_10days	1.051	1.054	0.044	0.02	0.024	0.124839	0.728628
SPAC110.02	YES_glucose_0.1percent_32C_10days	0.893	0.887	-0.22	-0.136	-0.143	0.399081	0.808744
SPAPJ696.01c	YES_glucose_0.1percent_32C_10days	0.897	0.881	-0.153	-0.099	-0.124	0.341087	0.798753
SPAC3H1.10	YES_glucose_0.1percent_32C_10days	1.085	1.074	0.058	0.012	-0.002	0.491556	0.851263
SPAC14C4.15c	YES_glucose_0.1percent_32C_10days	1.077	1.081	0.016	0.01	0.015	0.200201	0.759887
SPBC16E9.02c	YES_glucose_0.1percent_32C_10days	1.038	1.055	0.08	0.024	0.049	0.177244	0.747255
SPAC11E3.10	YES_glucose_0.1percent_32C_10days	1.053	1.057	0.123	0.058	0.065	0.450543	0.837821
SPCC1223.05c	YES_glucose_0.1percent_32C_10days	0.911	0.911	0.617	0.57	0.57	0.28217	0.780928
SPAC11D3.17	YES_glucose_0.1percent_32C_10days	1.033	1.036	-0.128	-0.085	-0.08	0.431453	0.831302
SPAC1296.01c	YES_glucose_0.1percent_32C_10days	1.018	1.017	-0.071	-0.012	-0.013	0.584668	0.873385
SPAC15E1.09	YES_glucose_0.1percent_32C_10days	0.984	0.974	-0.061	-0.043	-0.057	0.900447	0.980479
SPCC1450.11c	YES_glucose_0.1percent_32C_10days	1.026	1.021	-0.075	-0.006	-0.011	0.499331	0.852537
SPAC139.04c	YES_glucose_0.1percent_32C_10days	1.048	1.085	-0.147	-0.018	0.036	0.786553	0.94392
SPAC1805.15c	YES_glucose_0.1percent_32C_10days	0.996	0.991	-0.11	-0.022	-0.027	0.456291	0.840289
SPAC1851.02	YES_glucose_0.1percent_32C_10days	0.786	0.772	-0.292	-0.242	-0.267	0.0395899	0.681601
SPCC417.06c	YES_glucose_0.1percent_32C_10days	0.97	0.94	-0.142	-0.085	-0.128	0.860436	0.967189
SPAC15A10.10	YES_glucose_0.1percent_32C_10days	1.078	1.087	0.114	0.019	0.034	0.509769	0.854188
SPAC22A12.06c	YES_glucose_0.1percent_32C_10days	1.064	1.068	0.1	0.072	0.078	0.565775	0.870601
SPAC23C11.08	YES_glucose_0.1percent_32C_10days	0.948	0.962	-0.095	-0.022	0	0.0312616	0.681601
SPCC736.08	YES_glucose_0.1percent_32C_10days	0.933	0.935	-0.06	-0.036	-0.034	0.0241105	0.662964
SPAC16C9.06c	YES_glucose_0.1percent_32C_10days	1.206	1.202	0.134	0.055	0.052	0.181048	0.749529
SPAC30D11.10	YES_glucose_0.1percent_32C_10days	0.972	0.964	0.067	0.015	0.004	0.522125	0.854685
SPAC2C4.09	YES_glucose_0.1percent_32C_10days	1.047	1.037	0.133	0.063	0.051	0.198103	0.759887
SPAC1002.05c	YES_glucose_0.1percent_32C_10days	1.074	1.06	0.123	0.05	0.032	0.369041	0.801541
SPAC17D4.03c	YES_glucose_0.1percent_32C_10days	1.013	1.018	-0.092	-0.025	-0.017	0.152677	0.738482
SPAC4H3.02c	YES_glucose_0.1percent_32C_10days	1.07	1.095	0.231	0.117	0.155	0.275569	0.780928
SPAC5D6.08c	YES_glucose_0.1percent_32C_10days	1.022	1.014	0.088	0.035	0.025	0.501218	0.853563
SPAC1751.01c	YES_glucose_0.1percent_32C_10days	0.984	1.002	-0.154	-0.059	-0.031	0.661056	0.899097
SPAC1834.05	YES_glucose_0.1percent_32C_10days	0.93	0.936	0.201	0.086	0.098	0.696993	0.911854
SPACUNK4.17	YES_glucose_0.1percent_32C_10days	0.99	0.985	-0.025	-0.009	-0.016	0.573727	0.870601
SPAC824.07	YES_glucose_0.1percent_32C_10days	0.988	0.963	0.124	0.031	-0.004	0.213437	0.760257
SPAC19G12.02c	YES_glucose_0.1percent_32C_10days	1.055	1.076	0.137	0.102	0.132	0.0354083	0.681601
SPAC19B12.10	YES_glucose_0.1percent_32C_10days	1.12	1.096	0.125	0.06	0.03	0.268058	0.776999
SPBC1289.16c	YES_glucose_0.1percent_32C_10days	1.084	1.099	0.05	0.025	0.046	0.885522	0.9761
SPAPB17E12.05	YES_glucose_0.1percent_32C_10days	0.907	0.924	0.258	0.206	0.233	0.0468297	0.681601
SPAC2F7.03c	YES_glucose_0.1percent_32C_10days	0.893	0.909	-0.06	0.005	0.031	0.360591	0.799256
SPAC20H4.05c	YES_glucose_0.1percent_32C_10days	1.033	1.044	0.058	0.012	0.028	0.574386	0.870601
SPBC17A3.05c	YES_glucose_0.1percent_32C_10days	0.582	0.699	-1.074	-0.202	0.18	0.991286	0.996337
SPAC4F8.11	YES_glucose_0.1percent_32C_10days	0.934	0.972	-0.171	-0.041	0.019	0.221955	0.761558
SPAC1952.11c	YES_glucose_0.1percent_32C_10days	0.927	0.912	-0.085	-0.025	-0.048	0.870974	0.970079
SPBC12C2.02c	YES_glucose_0.1percent_32C_10days	0.999	0.985	-0.059	-0.027	-0.047	0.49873	0.852537
SPAC56E4.03	YES_glucose_0.1percent_32C_10days	0.919	0.891	0.084	-0.011	-0.053	0.0647515	0.683331
SPAC25B8.17	YES_glucose_0.1percent_32C_10days	1.034	1.045	0.099	0.04	0.057	0.804234	0.949277
SPBC14F5.10c	YES_glucose_0.1percent_32C_10days	0.965	0.973	-0.216	-0.11	-0.095	0.260075	0.774747
SPAC637.06	YES_glucose_0.1percent_32C_10days	0.861	0.838	-0.241	-0.181	-0.218	0.17198	0.742625
SPAC3A12.17c	YES_glucose_0.1percent_32C_10days	1.049	1.061	0.065	0.015	0.032	0.330425	0.797006
SPBC16G5.16	YES_glucose_0.1percent_32C_10days	1.094	1.087	0.096	0.075	0.065	0.156965	0.738482
SPAC6F12.09	YES_glucose_0.1percent_32C_10days	0.813	0.814	0.228	0.111	0.117	0.206455	0.760257
SPAC688.06c	YES_glucose_0.1percent_32C_10days	1.016	1.007	0.058	0	-0.013	0.467277	0.846563
SPBC1718.02	YES_glucose_0.1percent_32C_10days	1.028	1.038	-0.042	-0.014	0	0.461277	0.843112
SPAC823.14	YES_glucose_0.1percent_32C_10days	1.035	1.035	0.082	0.043	0.044	0.784092	0.943283
SPBC11B10.02c	YES_glucose_0.1percent_32C_10days	0.938	0.915	-0.072	-0.037	-0.072	0.0718628	0.693022
SPBC17D1.07c	YES_glucose_0.1percent_32C_10days	1.025	1.034	-0.107	-0.041	-0.028	0.0540324	0.681601
SPAC8F11.03	YES_glucose_0.1percent_32C_10days	1.009	0.989	0.125	0.015	-0.012	0.561279	0.870601
SPBC1773.06c	YES_glucose_0.1percent_32C_10days	1.028	1.036	-0.062	0.005	0.017	0.478633	0.848914
SPACUNK4.11c	YES_glucose_0.1percent_32C_10days	1	1.009	0.136	0.093	0.106	0.107576	0.722422
SPBC405.04c	YES_glucose_0.1percent_32C_10days	0.996	0.985	0.229	0.169	0.154	0.153591	0.738482
SPBC21B10.13c	YES_glucose_0.1percent_32C_10days	0.962	0.962	0.881	0.828	0.828	NaN	NaN
SPBC106.12c	YES_glucose_0.1percent_32C_10days	0.996	0.999	-0.04	-0.008	-0.004	0.451031	0.838267
SPBC651.05c	YES_glucose_0.1percent_32C_10days	0.902	0.906	-0.121	-0.092	-0.086	0.0245416	0.662964
SPBC25H2.08c	YES_glucose_0.1percent_32C_10days	0.801	0.754	-0.38	-0.257	-0.337	0.216317	0.760257
SPBC2A9.04c	YES_glucose_0.1percent_32C_10days	0.94	0.9	-0.165	-0.077	-0.136	0.594781	0.87908
SPBC106.05c	YES_glucose_0.1percent_32C_10days	0.746	0.766	-0.493	-0.368	-0.327	0.131081	0.728628
SPAC688.10	YES_glucose_0.1percent_32C_10days	0.976	0.986	-0.088	-0.01	0.006	0.44693	0.835657
SPBC32F12.02	YES_glucose_0.1percent_32C_10days	0.879	0.853	0.202	0.066	0.026	0.0393208	0.681601
SPBC1604.18c	YES_glucose_0.1percent_32C_10days	1.093	1.1	0.137	0.082	0.092	0.969982	0.991013
SPAPB1E7.08c	YES_glucose_0.1percent_32C_10days	1.027	1.02	-0.041	-0.021	-0.031	0.225538	0.763666
SPBC354.13	YES_glucose_0.1percent_32C_10days	0.962	0.954	-0.037	-0.015	-0.028	0.23617	0.768185
SPBC215.04	YES_glucose_0.1percent_32C_10days	0.877	0.876	-0.121	-0.023	-0.022	0.243483	0.768185
SPBC16A3.06	YES_glucose_0.1percent_32C_10days	1.019	1.022	0.047	0.023	0.027	0.390349	0.808007
SPBC4B4.04	YES_glucose_0.1percent_32C_10days	0.969	0.988	0.125	0.056	0.086	0.443672	0.833303
SPBC2D10.20	YES_glucose_0.1percent_32C_10days	1.032	1.023	-0.049	-0.03	-0.042	0.854995	0.963765
SPBC2D10.04	YES_glucose_0.1percent_32C_10days	0.966	0.979	-0.117	-0.06	-0.04	0.107059	0.722422
SPBC582.09	YES_glucose_0.1percent_32C_10days	1.063	1.07	0.03	0.007	0.016	0.052735	0.681601
SPBC4C3.12	YES_glucose_0.1percent_32C_10days	0.584	0.557	1.119	0.802	0.755	0.0615994	0.681601
SPBC4F6.06	YES_glucose_0.1percent_32C_10days	0.495	0.41	-1.102	-0.401	-0.531	0.683217	0.906928
SPBC776.01	YES_glucose_0.1percent_32C_10days	1.049	1.032	0.169	0.069	0.048	0.126245	0.728628
SPBP22H7.08	YES_glucose_0.1percent_32C_10days	0.868	0.86	0.232	0.099	0.09	0.581156	0.872071
SPCC1223.03c	YES_glucose_0.1percent_32C_10days	1.028	1.022	0.027	-0.003	-0.011	0.249593	0.768185
SPBP16F5.03c	YES_glucose_0.1percent_32C_10days	0.967	0.977	-0.187	-0.066	-0.047	0.570878	0.870601
SPCC1223.15c	YES_glucose_0.1percent_32C_10days	0.909	0.894	0.109	0.052	0.029	0.154214	0.738482
SPBP8B7.30c	YES_glucose_0.1percent_32C_10days	1.008	1.01	-0.091	-0.045	-0.042	0.439668	0.833081
SPAC1006.06	YES_glucose_0.1percent_32C_10days	1.006	1.006	-0.05	-0.042	-0.042	0.621987	0.892454
SPCP31B10.06	YES_glucose_0.1percent_32C_10days	1	0.993	-0.047	-0.014	-0.024	0.27477	0.780928
SPAC22F8.04	YES_glucose_0.1percent_32C_10days	0.826	0.783	0.224	0.048	-0.023	0.583456	0.872991
SPBC29B5.02c	YES_glucose_0.1percent_32C_10days	1.037	1.058	-0.131	-0.041	-0.012	0.515098	0.854284
SPCC16A11.01	YES_glucose_0.1percent_32C_10days	1.036	1.03	0.106	0.057	0.049	0.0672265	0.688355
SPAC23D3.01	YES_glucose_0.1percent_32C_10days	1.089	1.095	0.131	0.089	0.097	0.666388	0.90124
SPBC3D6.02	YES_glucose_0.1percent_32C_10days	1.059	1.054	0.163	0.088	0.083	0.31594	0.794389
SPCC737.07c	YES_glucose_0.1percent_32C_10days	1.024	1.012	0.101	0.022	0.006	0.849335	0.963025
SPAC25B8.11	YES_glucose_0.1percent_32C_10days	1.065	1.057	0.096	0.074	0.062	0.00913018	0.598769
SPBC725.14	YES_glucose_0.1percent_32C_10days	0.955	0.976	-0.07	0.005	0.037	0.768081	0.935102
SPAC167.04	YES_glucose_0.1percent_32C_10days	0.969	0.968	-0.045	-0.031	-0.032	0.00428214	0.578013
SPAC27E2.03c	YES_glucose_0.1percent_32C_10days	0.881	0.886	-0.038	-0.005	0.003	0.0440736	0.681601
SPCC11E10.09c	YES_glucose_0.1percent_32C_10days	0.999	1.003	-0.111	-0.051	-0.045	0.879452	0.973421
SPAC20G4.04c	YES_glucose_0.1percent_32C_10days	0.954	0.951	0.126	0.1	0.096	0.666514	0.90124
SPAC2F7.10	YES_glucose_0.1percent_32C_10days	1.104	1.094	0.212	0.109	0.098	0.516365	0.854284
SPCC16C4.06c	YES_glucose_0.1percent_32C_10days	1.106	1.105	0.103	0.051	0.051	0.150465	0.738482
SPAC3C7.03c	YES_glucose_0.1percent_32C_10days	0.97	0.977	0.187	0.072	0.086	0.451543	0.838757
SPAC328.04	YES_glucose_0.1percent_32C_10days	1.029	1.002	0.105	-0.001	-0.038	0.430272	0.831295
SPCC4F11.03c	YES_glucose_0.1percent_32C_10days	0.873	0.836	-0.182	-0.104	-0.163	0.162672	0.742358
SPAC637.03	YES_glucose_0.1percent_32C_10days	1.018	1.012	0.063	0.006	-0.001	0.37586	0.801541
SPAC3A12.12	YES_glucose_0.1percent_32C_10days	0.81	0.937	-0.766	-0.203	0.058	0.686228	0.907266
SPAC11D3.06	YES_glucose_0.1percent_32C_10days	1.03	1.014	-0.104	-0.027	-0.047	0.354221	0.798753
SPBC119.16c	YES_glucose_0.1percent_32C_10days	0.993	0.99	-0.072	-0.045	-0.05	0.0113128	0.655279
SPAC3H1.13	YES_glucose_0.1percent_32C_10days	1.032	1.034	-0.062	-0.036	-0.033	0.123827	0.728628
SPAC15A10.03c	YES_glucose_0.1percent_32C_10days	1.002	1.001	-0.085	-0.053	-0.054	0.149248	0.738482
SPBC16E9.07	YES_glucose_0.1percent_32C_10days	1.001	1.004	-0.03	-0.008	-0.004	0.0508028	0.681601
SPAC11E3.12	YES_glucose_0.1percent_32C_10days	1.026	1.009	0.056	-0.011	-0.034	0.182271	0.749529
SPCC1223.06	YES_glucose_0.1percent_32C_10days	0.922	0.917	0.257	0.204	0.197	0.354132	0.798753
SPAC11D3.18c	YES_glucose_0.1percent_32C_10days	1.016	1	-0.091	-0.066	-0.088	0.96952	0.990941
SPAC12B10.01c	YES_glucose_0.1percent_32C_10days	1.056	1.065	0.077	0.013	0.027	0.174731	0.744526
SPAC1687.23c	YES_glucose_0.1percent_32C_10days	1.028	0.996	0.124	0.019	-0.025	0.844316	0.96163
SPCC1682.08c	YES_glucose_0.1percent_32C_10days	1.055	1.057	0.058	0.024	0.027	0.756692	0.934659
SPAC13C5.03	YES_glucose_0.1percent_32C_10days	1.02	1.01	-0.068	-0.045	-0.059	0.418019	0.823704
SPAC19G12.15c	YES_glucose_0.1percent_32C_10days	0.749	0.741	-0.169	-0.118	-0.132	0.575543	0.870601
SPAC1952.02	YES_glucose_0.1percent_32C_10days	0.938	0.939	-0.036	-0.017	-0.016	0.280711	0.780928
SPCC417.09c	YES_glucose_0.1percent_32C_10days	1.025	1.02	-0.032	-0.011	-0.018	0.0482495	0.681601
SPAC15A10.11	YES_glucose_0.1percent_32C_10days	1.012	1.019	-0.22	-0.143	-0.132	0.905633	0.980479
SPAC22H10.11c	YES_glucose_0.1percent_32C_10days	0.996	1.008	0.064	0.045	0.063	0.569133	0.870601
SPAC23C11.10	YES_glucose_0.1percent_32C_10days	0.917	0.92	0.137	0.068	0.074	0.757614	0.934659
SPCC74.04	YES_glucose_0.1percent_32C_10days	1.077	1.071	0.047	0.021	0.013	0.0836025	0.699234
SPAC1705.02	YES_glucose_0.1percent_32C_10days	1.087	1.077	-0.061	-0.033	-0.046	0.5776	0.87069
SPAC30D11.11	YES_glucose_0.1percent_32C_10days	0.867	0.888	-0.258	-0.16	-0.124	0.595078	0.87908
SPAC2F3.12c	YES_glucose_0.1percent_32C_10days	1.047	1.047	0.108	0.053	0.054	0.0376362	0.681601
SPAC1006.03c	YES_glucose_0.1percent_32C_10days	0.786	0.897	-0.577	0.007	0.252	NaN	NaN
SPAC17G6.02c	YES_glucose_0.1percent_32C_10days	1.082	1.08	0.06	0.008	0.006	0.158173	0.738911
SPAC56F8.02	YES_glucose_0.1percent_32C_10days	0.869	0.852	-0.198	-0.162	-0.189	0.00390243	0.578013
SPAC630.11	YES_glucose_0.1percent_32C_10days	1.037	1.006	0.184	0.066	0.024	0.307203	0.791444
SPAC1782.08c	YES_glucose_0.1percent_32C_10days	0.916	0.961	-0.379	-0.187	-0.113	0.39514	0.80872
SPAC1851.03	YES_glucose_0.1percent_32C_10days	1.01	1.017	0.157	0.095	0.107	0.810184	0.950568
SPAP8A3.13c	YES_glucose_0.1percent_32C_10days	1.021	1.027	0.065	0.05	0.059	0.512649	0.854188
SPAC890.07c	YES_glucose_0.1percent_32C_10days	1.04	1.025	0.079	0.012	-0.008	0.844335	0.96163
SPAC1A6.01c	YES_glucose_0.1percent_32C_10days	0.98	0.981	0.08	0.064	0.066	0.232451	0.768185
SPAC19B12.11c	YES_glucose_0.1percent_32C_10days	0.911	0.915	0.215	0.207	0.214	0.157101	0.738482
SPBC12C2.08	YES_glucose_0.1percent_32C_10days	0.967	0.966	-0.139	-0.06	-0.059	0.215966	0.760257
SPAPB17E12.08	YES_glucose_0.1percent_32C_10days	0.805	0.802	-0.179	-0.097	-0.101	0.150683	0.738482
SPAC30.01c	YES_glucose_0.1percent_32C_10days	1.019	1.033	0.062	0.012	0.033	0.789525	0.945134
SPAC20H4.10	YES_glucose_0.1percent_32C_10days	1.255	1.254	0.217	0.205	0.203	0.0298036	0.681601
SPBC18A7.02c	YES_glucose_0.1percent_32C_10days	1.046	1.042	-0.055	-0.005	-0.01	0.95795	0.988087
SPAC19E9.01c	YES_glucose_0.1percent_32C_10days	1.102	1.114	0.119	0.047	0.064	0.447152	0.835657
SPBC12C2.05c	YES_glucose_0.1percent_32C_10days	1.029	1.014	-0.055	-0.014	-0.035	0.438195	0.832582
SPAC56E4.06c	YES_glucose_0.1percent_32C_10days	0.959	0.957	-0.091	-0.085	-0.088	0.389597	0.808007
SPAC25H1.04	YES_glucose_0.1percent_32C_10days	1.088	1.098	0.056	0.042	0.055	0.842709	0.96163
SPBC14F5.13c	YES_glucose_0.1percent_32C_10days	1.034	1.027	0.022	0	-0.01	0.0341743	0.681601
SPAC3C7.02c	YES_glucose_0.1percent_32C_10days	1.056	1.032	0.156	0.045	0.014	0.473353	0.847465
SPBC16H5.03c	YES_glucose_0.1percent_32C_10days	0.905	0.908	0.124	0.031	0.038	0.877842	0.973421
SPAC6F12.12	YES_glucose_0.1percent_32C_10days	1.002	0.996	-0.051	-0.017	-0.026	0.15879	0.738911
SPAC824.02	YES_glucose_0.1percent_32C_10days	0.535	0.382	-0.892	-0.147	-0.428	0.938949	0.985379
SPBC11B10.05c	YES_glucose_0.1percent_32C_10days	1.026	1.024	0.096	0.028	0.026	0.794249	0.946396
SPBC17D11.04c	YES_glucose_0.1percent_32C_10days	1.037	1.01	0.173	0.085	0.048	0.325496	0.797006
SPAC9.05	YES_glucose_0.1percent_32C_10days	0.996	0.983	0.058	0.005	-0.014	0.727631	0.926068
SPBC18E5.07	YES_glucose_0.1percent_32C_10days	0.881	0.817	-0.224	-0.121	-0.222	0.286308	0.781205
SPBC19G7.10c	YES_glucose_0.1percent_32C_10days	0.795	0.726	-0.327	-0.16	-0.276	0.41273	0.819395
SPACUNK4.13c	YES_glucose_0.1percent_32C_10days	0.984	0.981	-0.084	-0.042	-0.047	0.346112	0.798753
SPBC409.11	YES_glucose_0.1percent_32C_10days	0.989	0.986	-0.131	-0.056	-0.059	0.200602	0.759887
SPBC21C3.03	YES_glucose_0.1percent_32C_10days	0.797	0.782	-0.403	-0.374	-0.401	0.0585326	0.681601
SPBC1105.08	YES_glucose_0.1percent_32C_10days	1.063	1.041	0.208	0.118	0.089	0.917771	0.982815
SPBC26H8.09c	YES_glucose_0.1percent_32C_10days	1.114	1.113	0.25	0.179	0.179	0.0463231	0.681601
SPBC2D10.15c	YES_glucose_0.1percent_32C_10days	1.016	1.012	-0.051	-0.037	-0.042	0.042678	0.681601
SPBC1105.09	YES_glucose_0.1percent_32C_10days	1.012	1.02	-0.091	-0.036	-0.024	0.125582	0.728628
SPAC6F6.01	YES_glucose_0.1percent_32C_10days	0.93	0.929	-0.127	-0.084	-0.085	0.640774	0.897169
SPAPYUG7.03c	YES_glucose_0.1percent_32C_10days	0.846	0.835	0.117	0.068	0.049	0.62224	0.892454
SPBC359.06	YES_glucose_0.1percent_32C_10days	1.02	1.024	-0.033	-0.002	0.004	0.210814	0.760257
SPBC21B10.08c	YES_glucose_0.1percent_32C_10days	1.03	1.032	0.041	0.013	0.015	0.485498	0.850954
SPBC16E9.11c	YES_glucose_0.1percent_32C_10days	1.008	1.04	-0.116	0.011	0.059	0.796786	0.946999
SPBC4B4.07c	YES_glucose_0.1percent_32C_10days	0.982	0.983	0.199	0.132	0.134	0.549831	0.867991
SPBC2G2.05	YES_glucose_0.1percent_32C_10days	1.044	1.042	-0.054	-0.036	-0.039	0.979094	0.99356
SPBC2D10.18	YES_glucose_0.1percent_32C_10days	0.798	0.793	-0.257	-0.102	-0.106	0.662142	0.899097
SPBC609.02	YES_glucose_0.1percent_32C_10days	1.026	1.034	0.031	0.013	0.024	0.116764	0.728628
SPBC56F2.14	YES_glucose_0.1percent_32C_10days	0.99	0.985	-0.076	-0.057	-0.064	0.533066	0.861962
SPBC530.06c	YES_glucose_0.1percent_32C_10days	1.056	1.085	0.101	0.055	0.096	0.219435	0.761406
SPBC800.04c	YES_glucose_0.1percent_32C_10days	0.97	0.923	0.835	0.665	0.599	0.531088	0.860184
SPBP4H10.08	YES_glucose_0.1percent_32C_10days	0.986	1.015	-0.168	-0.071	-0.028	0.59832	0.880358
SPCC1322.03	YES_glucose_0.1percent_32C_10days	0.91	0.903	-0.21	-0.143	-0.153	0.0702313	0.693022
SPBP16F5.05c	YES_glucose_0.1percent_32C_10days	0.855	0.861	-0.269	-0.158	-0.145	0.0425318	0.681601
SPCC338.16	YES_glucose_0.1percent_32C_10days	0.731	0.727	-0.39	-0.341	-0.348	0.0859141	0.699234
SPBPB2B2.05	YES_glucose_0.1percent_32C_10days	1.089	1.084	0.132	0.048	0.043	0.727801	0.926068
SPAC1039.05c	YES_glucose_0.1percent_32C_10days	1.096	1.109	0.072	0.051	0.069	0.202818	0.759887
SPCP31B10.07	YES_glucose_0.1percent_32C_10days	1.02	0.991	0.268	0.169	0.13	0.0591875	0.681601
SPAC22F8.11	YES_glucose_0.1percent_32C_10days	0.807	0.829	0.182	0.098	0.14	0.673321	0.901638
SPBC2F12.03c	YES_glucose_0.1percent_32C_10days	1.194	1.218	-0.064	0.009	0.038	0.0878947	0.699234
SPCC18B5.05c	YES_glucose_0.1percent_32C_10days	1.021	0.992	0.066	-0.017	-0.058	0.538323	0.863618
SPAC23D3.03c	YES_glucose_0.1percent_32C_10days	0.986	0.992	-0.056	-0.036	-0.028	0.476113	0.847803
SPBC3E7.09	YES_glucose_0.1percent_32C_10days	1.016	1.036	-0.07	-0.006	0.024	0.719815	0.922161
SPCC757.07c	YES_glucose_0.1percent_32C_10days	1	1.015	-0.108	-0.008	0.015	0.963504	0.990941
SPAC25G10.03	YES_glucose_0.1percent_32C_10days	0.858	0.86	-0.167	-0.095	-0.091	0.083766	0.699234
SPBC800.11	YES_glucose_0.1percent_32C_10days	1.042	1.036	-0.034	-0.02	-0.028	0.711733	0.920996
SPAC1687.12c	YES_glucose_0.1percent_32C_10days	0.877	0.851	-0.292	-0.137	-0.174	0.169215	0.742625
SPAC27F1.05c	YES_glucose_0.1percent_32C_10days	1.047	1.026	0.128	0.024	-0.003	0.442351	0.833081
SPCC1223.02	YES_glucose_0.1percent_32C_10days	0.974	1.001	-0.152	-0.04	0.001	0.252287	0.768185
SPAC212.08c	YES_glucose_0.1percent_32C_10days	0.976	0.978	-0.094	-0.051	-0.048	0.150637	0.738482
SPAC2G11.05c	YES_glucose_0.1percent_32C_10days	0.979	0.966	-0.041	-0.021	-0.04	0.442837	0.833081
SPCC1739.10	YES_glucose_0.1percent_32C_10days	1.003	1.007	-0.04	-0.009	-0.003	0.748191	0.93412
SPAC3C7.09	YES_glucose_0.1percent_32C_10days	1.013	1.016	-0.107	-0.022	-0.016	0.567103	0.870601
SPAC328.06	YES_glucose_0.1percent_32C_10days	1.024	1.025	0.04	0.023	0.024	0.00849289	0.598769
SPCC4G3.10c	YES_glucose_0.1percent_32C_10days	1.029	1.039	-0.114	0.005	0.021	0.845988	0.962567
SPAC644.11c	YES_glucose_0.1percent_32C_10days	0.954	0.966	-0.155	-0.096	-0.077	0.646443	0.897169
SPAC3C7.04	YES_glucose_0.1percent_32C_10days	0.97	0.953	0.369	0.267	0.244	0.298893	0.788544
SPAC11E3.04c	YES_glucose_0.1percent_32C_10days	1.006	1.01	-0.066	-0.039	-0.033	0.0948715	0.705125
SPAC3H5.07	YES_glucose_0.1percent_32C_10days	0.879	0.894	0.266	0.226	0.252	0.844347	0.96163
SPAC15E1.05c	YES_glucose_0.1percent_32C_10days	1.11	1.128	0.215	0.129	0.155	0.207355	0.760257
SPBC1773.04	YES_glucose_0.1percent_32C_10days	1.031	1.039	-0.037	-0.01	0.001	0.248841	0.768185
SPAC1296.04	YES_glucose_0.1percent_32C_10days	1.031	1.04	0.071	0.032	0.044	0.68888	0.907334
SPCC1223.13	YES_glucose_0.1percent_32C_10days	1.099	1.113	0.04	0.019	0.037	0.5472	0.867555
SPAC11E3.01c	YES_glucose_0.1percent_32C_10days	1.104	1.104	0.121	0.097	0.097	0.891657	0.977956
SPAC139.05	YES_glucose_0.1percent_32C_10days	1.022	1.011	-0.135	-0.014	-0.025	0.814902	0.951893
SPAC16A10.05c	YES_glucose_0.1percent_32C_10days	0.872	0.882	0.082	0.028	0.045	0.835789	0.959321
SPCC1795.01c	YES_glucose_0.1percent_32C_10days	1	1	-0.06	-0.048	-0.048	0.383117	0.804984
SPAC13C5.07	YES_glucose_0.1percent_32C_10days	0.93	0.938	-0.059	0.001	0.014	0.355621	0.798753
SPAC1B3.17	YES_glucose_0.1percent_32C_10days	1.068	1.067	0.099	0.068	0.068	0.0716123	0.693022
SPAC19A8.11c	YES_glucose_0.1percent_32C_10days	0.916	0.927	-0.113	-0.067	-0.049	0.202077	0.759887
SPCC4B3.15	YES_glucose_0.1percent_32C_10days	0.838	0.844	-0.264	-0.171	-0.159	0.0440736	0.681601
SPAC15A10.16	YES_glucose_0.1percent_32C_10days	1.102	1.07	0.183	0.075	0.035	0.624769	0.892866
SPAC23C4.05c	YES_glucose_0.1percent_32C_10days	1.068	1.054	0.146	0.053	0.036	0.456133	0.840289
SPAC23C4.16c	YES_glucose_0.1percent_32C_10days	1.028	1.03	0.037	0.018	0.021	0.715097	0.920996
SPCC757.04	YES_glucose_0.1percent_32C_10days	1.015	1.02	-0.054	-0.008	-0.001	0.313394	0.794389
SPAC1782.01	YES_glucose_0.1percent_32C_10days	1.023	1.031	-0.066	-0.001	0.011	0.604094	0.882036
SPAC31G5.10	YES_glucose_0.1percent_32C_10days	1.022	1.018	0.05	0.033	0.027	1	1
SPAC2F3.18c	YES_glucose_0.1percent_32C_10days	0.991	1.002	-0.039	0.004	0.02	0.0595165	0.681601
SPAC10F6.11c	YES_glucose_0.1percent_32C_10days	1.022	1.021	-0.064	-0.036	-0.037	0.0654484	0.685683
SPAC17G6.05c	YES_glucose_0.1percent_32C_10days	0.996	0.995	-0.106	-0.08	-0.081	0.688079	0.907266
SPAC630.15	YES_glucose_0.1percent_32C_10days	1.007	1.006	0.052	0.038	0.036	0.0198681	0.662964
SPAC1783.05	YES_glucose_0.1percent_32C_10days	0.973	0.978	0.188	0.095	0.105	0.0562353	0.681601
SPAC18B11.07c	YES_glucose_0.1percent_32C_10days	1.107	1.077	0.194	0.054	0.017	0.460932	0.843112
SPAPB1E7.04c	YES_glucose_0.1percent_32C_10days	0.961	0.961	0.03	0.006	0.006	0.866672	0.969412
SPAC8C9.14	YES_glucose_0.1percent_32C_10days	1.016	1.007	0.071	0.004	-0.009	0.418525	0.823704
SPAC1A6.04c	YES_glucose_0.1percent_32C_10days	0.754	0.762	-0.541	-0.423	-0.404	0.0245425	0.662964
SPAC1B2.04	YES_glucose_0.1percent_32C_10days	1.09	1.081	0.129	0.032	0.022	0.482381	0.850954
SPBC13G1.08c	YES_glucose_0.1percent_32C_10days	0.801	0.849	-0.212	-0.032	0.058	0.18301	0.749529
SPAPB17E12.12c	YES_glucose_0.1percent_32C_10days	0.94	0.925	-0.254	-0.164	-0.186	0.344511	0.798753
SPAC32A11.02c	YES_glucose_0.1percent_32C_10days	1.06	1.049	0.1	0.009	-0.005	0.878579	0.973421
SPAC222.14c	YES_glucose_0.1percent_32C_10days	1.062	1.075	0.195	0.122	0.142	0.556953	0.870601
SPBC18E5.11c	YES_glucose_0.1percent_32C_10days	1	1.004	-0.088	-0.07	-0.065	0.193238	0.756356
SPAC4G8.04	YES_glucose_0.1percent_32C_10days	0.93	0.936	0.061	0.026	0.035	0.985646	0.994696
SPAC1A6.09c	YES_glucose_0.1percent_32C_10days	1.042	1.017	-0.096	-0.026	-0.058	0.878262	0.973421
SPAC29A4.20	YES_glucose_0.1percent_32C_10days	0.978	0.974	0.095	0.042	0.037	0.966959	0.990941
SPBC15C4.05	YES_glucose_0.1percent_32C_10days	0.938	0.955	-0.167	-0.071	-0.043	0.796971	0.946999
SPAC644.14c	YES_glucose_0.1percent_32C_10days	0.924	0.91	0.059	0	-0.021	0.321034	0.794389
SPAC3C7.05c	YES_glucose_0.1percent_32C_10days	1.068	1.076	0.089	0.048	0.059	0.0886528	0.699234
SPBC16H5.04	YES_glucose_0.1percent_32C_10days	1.066	1.063	0.15	0.082	0.079	0.169495	0.742625
SPAC6G9.04	YES_glucose_0.1percent_32C_10days	1.005	1.01	0.036	0.009	0.016	0.215946	0.760257
SPAC6G10.12c	YES_glucose_0.1percent_32C_10days	0.925	0.92	-0.07	-0.014	-0.02	0.290106	0.7834
SPBC1734.07c	YES_glucose_0.1percent_32C_10days	1.019	1.011	0.187	0.055	0.048	0.573046	0.870601
SPAC824.04	YES_glucose_0.1percent_32C_10days	0.776	0.776	0.487	0.381	0.381	NaN	NaN
SPBC1289.14	YES_glucose_0.1percent_32C_10days	0.981	0.956	-0.106	-0.027	-0.062	0.823982	0.955168
SPBC17F3.01c	YES_glucose_0.1percent_32C_10days	0.961	0.904	-0.167	-0.069	-0.151	0.365767	0.801541
SPAC9.10	YES_glucose_0.1percent_32C_10days	1.044	1.013	0.138	0.047	0.005	0.400484	0.808744
SPBC211.06	YES_glucose_0.1percent_32C_10days	1.035	1.035	0.076	0.036	0.036	0.432538	0.831302
SPBC1D7.01	YES_glucose_0.1percent_32C_10days	1.023	1.015	0.063	0.001	-0.009	0.91622	0.982195
SPACUNK4.16c	YES_glucose_0.1percent_32C_10days	1.073	1.067	0.152	0.133	0.124	0.437314	0.832421
SPBC418.01c	YES_glucose_0.1percent_32C_10days	1.057	1.049	0.052	0.021	0.01	0.169685	0.742625
SPBC21C3.08c	YES_glucose_0.1percent_32C_10days	1.141	1.134	0.091	0.064	0.055	0.176963	0.74704
SPBC1105.10	YES_glucose_0.1percent_32C_10days	0.835	0.827	-0.291	-0.223	-0.236	0.105395	0.719031
SPBC660.07	YES_glucose_0.1percent_32C_10days	0.959	0.94	0.047	-0.011	-0.04	0.0892639	0.699234
SPBC27.04	YES_glucose_0.1percent_32C_10days	1.029	1.013	0.044	-0.005	-0.027	0.667957	0.90124
SPBC11C11.07	YES_glucose_0.1percent_32C_10days	0.962	0.982	0.341	0.163	0.201	0.694343	0.910116
SPAC6F6.13c	YES_glucose_0.1percent_32C_10days	1.013	1.01	0.048	0.037	0.032	0.893342	0.978618
SPBC32H8.06	YES_glucose_0.1percent_32C_10days	1.002	0.983	0.091	0.003	-0.023	0.751402	0.93412
SPBC16C6.05	YES_glucose_0.1percent_32C_10days	0.959	0.953	0.22	0.096	0.09	0.287526	0.781205
SPBC1105.04c	YES_glucose_0.1percent_32C_10days	0.802	0.767	1.108	0.915	0.859	0.0456793	0.681601
SPBC36.07	YES_glucose_0.1percent_32C_10days	1.021	1.011	0.057	0.015	0.001	0.670375	0.901576
SPBC21C3.11	YES_glucose_0.1percent_32C_10days	1.085	1.103	0.143	0.092	0.116	0.669255	0.901383
SPBC1706.01	YES_glucose_0.1percent_32C_10days	0.911	0.9	0.235	0.155	0.138	0.33207	0.797006
SPBC4B4.10c	YES_glucose_0.1percent_32C_10days	0.988	0.974	-0.138	-0.098	-0.118	0.499509	0.852537
SPBC30D10.09c	YES_glucose_0.1percent_32C_10days	1.008	1.003	-0.098	-0.087	-0.095	0.635141	0.897154
SPBC2G2.14	YES_glucose_0.1percent_32C_10days	0.897	0.909	0.156	0.06	0.081	0.79851	0.947161
SPBC609.03	YES_glucose_0.1percent_32C_10days	1.045	1.034	0.063	0.02	0.005	0.135176	0.728628
SPBC577.02	YES_glucose_0.1percent_32C_10days	0.883	0.903	0.128	0.082	0.116	0.791495	0.945733
SPBC691.03c	YES_glucose_0.1percent_32C_10days	1.002	0.983	0.158	0.058	0.032	0.681164	0.905737
SPBC83.05	YES_glucose_0.1percent_32C_10days	1.047	1.058	-0.048	0	0.016	0.562097	0.870601
SPBP4H10.12	YES_glucose_0.1percent_32C_10days	1.029	1.041	-0.096	-0.019	-0.002	0.353236	0.798753
SPCC1494.10	YES_glucose_0.1percent_32C_10days	1.238	1.257	0.441	0.372	0.396	0.0532692	0.681601
SPBP16F5.08c	YES_glucose_0.1percent_32C_10days	1.001	0.997	-0.077	-0.062	-0.068	0.16118	0.742358
SPCC1682.01	YES_glucose_0.1percent_32C_10days	0.169	0.174	-2.74	-2.102	-1.984	0.00457036	0.578013
SPCC584.03c	YES_glucose_0.1percent_32C_10days	1.017	1.011	-0.047	-0.032	-0.04	0.0104288	0.643299
SPBPB2B2.10c	YES_glucose_0.1percent_32C_10days	1.049	1.044	0.066	0.034	0.027	0.926927	0.985379
SPAC1071.02	YES_glucose_0.1percent_32C_10days	1.017	1.021	0.038	0.019	0.025	0.811908	0.950568
SPCPB1C11.03	YES_glucose_0.1percent_32C_10days	1.01	1.022	0.047	0.026	0.043	0.676321	0.903755
SPAC22G7.02	YES_glucose_0.1percent_32C_10days	0.966	0.954	-0.23	-0.208	-0.226	0.105274	0.719031
SPBC2G2.01c	YES_glucose_0.1percent_32C_10days	0.873	0.793	-0.492	-0.236	-0.349	0.219797	0.761406
SPAC23D3.09	YES_glucose_0.1percent_32C_10days	0.817	0.763	0.231	0.025	-0.066	0.635097	0.897154
SPBC3E7.11c	YES_glucose_0.1percent_32C_10days	1.026	1.032	-0.044	-0.028	-0.02	0.399952	0.808744
SPCC794.01c	YES_glucose_0.1percent_32C_10days	1.063	1.057	0.109	0.053	0.046	0.41525	0.821315
SPAC25H1.02	YES_glucose_0.1percent_32C_10days	1.068	1.067	0.049	0.034	0.032	0.263975	0.775167
SPBC839.06	YES_glucose_0.1percent_32C_10days	1.076	1.09	0.066	0.034	0.054	0.282265	0.780928
SPAC186.05c	YES_glucose_0.1percent_32C_10days	1.074	1.069	0.099	0.062	0.056	0.277029	0.780928
SPAC27F1.06c	YES_glucose_0.1percent_32C_10days	1.015	1.019	-0.086	-0.017	-0.011	0.758845	0.934659
SPCC1235.12c	YES_glucose_0.1percent_32C_10days	1.095	1.099	0.028	0.02	0.026	0.00441891	0.578013
SPAC222.08c	YES_glucose_0.1percent_32C_10days	0.921	0.961	-0.176	-0.035	0.029	0.883048	0.975164
SPAC2G11.12	YES_glucose_0.1percent_32C_10days	0.772	0.768	-0.18	-0.119	-0.125	0.138207	0.733065
SPCC1753.02c	YES_glucose_0.1percent_32C_10days	0.889	0.875	0.155	0.075	0.053	0.494505	0.852447
SPAC458.02c	YES_glucose_0.1percent_32C_10days	0.991	0.989	-0.039	-0.011	-0.014	0.0740843	0.693022
SPAC328.09	YES_glucose_0.1percent_32C_10days	1.081	1.111	0.095	0.051	0.092	0.132615	0.728628
SPCC553.01c	YES_glucose_0.1percent_32C_10days	0.709	0.91	-1.598	-0.295	0.307	0.746101	0.93412
SPAC869.10c	YES_glucose_0.1percent_32C_10days	1.068	1.061	0.094	0.055	0.046	0.222131	0.761558
SPAC3C7.12	YES_glucose_0.1percent_32C_10days	0.584	0.808	-3.349	-0.944	0.201	0.519828	0.854284
SPAC11E3.08c	YES_glucose_0.1percent_32C_10days	1.062	1.048	0.05	0.01	-0.008	0.157898	0.738911
SPBC12C2.04	YES_glucose_0.1percent_32C_10days	1.069	1.068	0.059	0.032	0.031	0.456159	0.840289
SPAC3H5.08c	YES_glucose_0.1percent_32C_10days	0.945	0.934	0.134	0.053	0.038	0.562004	0.870601
SPAC1687.09	YES_glucose_0.1percent_32C_10days	1.076	1.073	0.067	0.052	0.048	0.217438	0.760257
SPBC1773.08c	YES_glucose_0.1percent_32C_10days	1.029	1.027	-0.047	-0.006	-0.009	0.850848	0.963025
SPAC13A11.03	YES_glucose_0.1percent_32C_10days	1.043	1.029	0.058	0.001	-0.019	0.673317	0.901638
SPCC1235.05c	YES_glucose_0.1percent_32C_10days	1.09	1.054	0.16	0.031	-0.014	0.552977	0.869066
SPAC11E3.09	YES_glucose_0.1percent_32C_10days	1.129	1.136	0.073	0.037	0.047	0.808911	0.949732
SPAC13A11.04c	YES_glucose_0.1percent_32C_10days	0.899	0.909	0.032	0.01	0.027	0.090016	0.699234
SPAC16E8.08	YES_glucose_0.1percent_32C_10days	1	1.003	-0.011	0	0.005	0.214731	0.760257
SPCC1840.02c	YES_glucose_0.1percent_32C_10days	1.02	1.015	-0.073	-0.032	-0.038	0.350025	0.798753
SPAC13D6.03c	YES_glucose_0.1percent_32C_10days	1.217	1.206	0.314	0.225	0.214	0.0743731	0.693022
SPAC1B9.02c	YES_glucose_0.1percent_32C_10days	0.841	0.81	-0.464	-0.269	-0.312	0.260249	0.774747
SPAC19D5.11c	YES_glucose_0.1percent_32C_10days	0.967	0.968	0.105	0.069	0.071	0.787861	0.944395
SPAC1610.03c	YES_glucose_0.1percent_32C_10days	0.897	0.872	-0.329	-0.245	-0.283	0.113842	0.727218
SPAC23D3.10c	YES_glucose_0.1percent_32C_10days	1.065	1.052	0.103	0.061	0.043	0.28261	0.780928
SPAC23C4.17	YES_glucose_0.1percent_32C_10days	1.05	1.052	-0.051	-0.006	-0.004	0.929339	0.985379
SPCC794.11c	YES_glucose_0.1percent_32C_10days	1.02	1.024	0.246	0.223	0.229	0.00767067	0.598769
SPAC1782.05	YES_glucose_0.1percent_32C_10days	1.075	1.078	0.018	0.006	0.01	0.956036	0.988001
SPAC343.16	YES_glucose_0.1percent_32C_10days	0.94	0.937	0.027	0.015	0.011	0.799327	0.947465
SPAC343.20	YES_glucose_0.1percent_32C_10days	1.038	1.045	-0.029	-0.005	0.004	0.862886	0.967942
SPAC10F6.14c	YES_glucose_0.1percent_32C_10days	1.001	0.988	-0.054	-0.021	-0.039	0.377866	0.801541
SPAC17G6.13	YES_glucose_0.1percent_32C_10days	1.107	1.136	0.101	0.058	0.097	0.749661	0.93412
SPAC589.05c	YES_glucose_0.1percent_32C_10days	1.067	1.091	0.145	0.078	0.112	0.923302	0.984739
SPAC664.10	YES_glucose_0.1percent_32C_10days	1.034	1.031	0.074	0.023	0.019	0.450278	0.837791
SPAC1783.07c	YES_glucose_0.1percent_32C_10days	1.104	1.082	0.131	0.068	0.04	0.209602	0.760257
SPAC18G6.15	YES_glucose_0.1percent_32C_10days	0.955	0.997	0.126	0.038	0.104	0.768231	0.935102
SPAPB2C8.01	YES_glucose_0.1percent_32C_10days	1.019	1.013	0.123	0.023	0.017	0.598793	0.880358
SPAC8C9.19	YES_glucose_0.1percent_32C_10days	0.918	0.931	-0.155	-0.038	-0.015	0.147941	0.738482
SPAC22H10.03c	YES_glucose_0.1percent_32C_10days	0.853	0.863	-0.303	-0.171	-0.151	0.131794	0.728628
SPAC1B3.04c	YES_glucose_0.1percent_32C_10days	1.028	0.999	0.063	-0.018	-0.058	0.586195	0.873424
SPBC1604.02c	YES_glucose_0.1percent_32C_10days	0.877	0.862	0.102	0.028	0.003	0.991491	0.996337
SPAPB17E12.14c	YES_glucose_0.1percent_32C_10days	0.904	0.9	-0.186	-0.159	-0.165	0.190418	0.755607
SPAC32A11.03c	YES_glucose_0.1percent_32C_10days	1.188	1.162	0.217	0.124	0.093	0.211151	0.760257
SPAC222.15	YES_glucose_0.1percent_32C_10days	1.033	1.018	-0.038	-0.017	-0.038	0.643297	0.897169
SPBC1921.03c	YES_glucose_0.1percent_32C_10days	0.961	0.96	0.394	0.337	0.336	0.27583	0.780928
SPAC4G8.05	YES_glucose_0.1percent_32C_10days	0.959	0.965	0.112	0.075	0.084	0.190643	0.755607
SPAC1D4.01	YES_glucose_0.1percent_32C_10days	1.077	1.047	0.164	0.044	0.005	0.659735	0.899097
SPBC12D12.06	YES_glucose_0.1percent_32C_10days	0.468	0.629	-2.341	-0.805	-0.056	0.648357	0.897169
SPAC56F8.06c	YES_glucose_0.1percent_32C_10days	0.9	0.885	-0.23	-0.175	-0.198	0.0167308	0.655279
SPAC2C4.15c	YES_glucose_0.1percent_32C_10days	1.034	1.062	0.317	0.203	0.246	0.19725	0.759887
SPBC15D4.03	YES_glucose_0.1percent_32C_10days	0.961	0.978	-0.162	-0.013	0.016	0.806145	0.949277
SPAC664.01c	YES_glucose_0.1percent_32C_10days	0.928	0.95	0.113	0.076	0.11	0.149567	0.738482
SPAC3F10.05c	YES_glucose_0.1percent_32C_10days	1.012	1.01	-0.029	-0.002	-0.005	0.317939	0.794389
SPBC16H5.05c	YES_glucose_0.1percent_32C_10days	1.049	1.041	0.071	0.017	0.007	0.356715	0.798825
SPAC6G9.05	YES_glucose_0.1percent_32C_10days	0.98	0.976	-0.043	-0.028	-0.034	0.493906	0.852447
SPAC750.06c	YES_glucose_0.1percent_32C_10days	1.041	1.058	-0.08	0.001	0.025	0.386229	0.80655
SPBC1734.12c	YES_glucose_0.1percent_32C_10days	0.866	0.853	0.191	0.078	0.059	0.0853861	0.699234
SPAC824.08	YES_glucose_0.1percent_32C_10days	1.013	1.02	0.037	0.015	0.026	0.694082	0.910116
SPBC1347.09	YES_glucose_0.1percent_32C_10days	1.065	1.059	0.126	0.082	0.074	0.907313	0.980479
SPBC17G9.05	YES_glucose_0.1percent_32C_10days	1.073	1.084	0.086	0.067	0.082	0.398781	0.808744
SPAC922.03	YES_glucose_0.1percent_32C_10days	0.95	0.953	-0.124	-0.078	-0.073	0.599503	0.88061
SPBC28F2.10c	YES_glucose_0.1percent_32C_10days	0.871	0.822	0.201	0.031	-0.046	0.911026	0.981486
SPBC215.01	YES_glucose_0.1percent_32C_10days	0.994	1.01	-0.193	-0.021	0.007	0.843445	0.96163
SPAP14E8.04	YES_glucose_0.1percent_32C_10days	0.985	0.983	-0.082	-0.045	-0.048	0.812079	0.950568
SPBC428.03c	YES_glucose_0.1percent_32C_10days	1.033	1.016	0.081	0.031	0.007	0.0897589	0.699234
SPBC21C3.09c	YES_glucose_0.1percent_32C_10days	1.047	1.04	-0.029	-0.006	-0.015	0.43054	0.831295
SPBC1105.11c	YES_glucose_0.1percent_32C_10days	1.009	0.994	0.073	0.012	-0.009	0.44306	0.833081
SPBC691.04	YES_glucose_0.1percent_32C_10days	0.743	0.696	-0.417	-0.298	-0.385	0.0405381	0.681601
SPBC27B12.05	YES_glucose_0.1percent_32C_10days	1.016	1.011	-0.061	-0.005	-0.012	0.706461	0.920007
SPBC2F12.11c	YES_glucose_0.1percent_32C_10days	0.968	0.966	0.085	0.016	0.014	0.549025	0.867991
SPBC1348.01	YES_glucose_0.1percent_32C_10days	1.041	1.029	0.059	-0.005	-0.022	0.937434	0.985379
SPAC6G10.02c	YES_glucose_0.1percent_32C_10days	0.976	0.979	0.055	0.046	0.051	0.332965	0.797006
SPBC32H8.08c	YES_glucose_0.1percent_32C_10days	0.982	0.977	-0.125	-0.083	-0.091	0.172567	0.742625
SPBC16E9.15	YES_glucose_0.1percent_32C_10days	0.975	0.974	-0.125	-0.098	-0.1	0.168881	0.742625
SPBC1105.05	YES_glucose_0.1percent_32C_10days	0.903	0.899	0.108	0.072	0.067	0.186009	0.751756
SPBC365.01	YES_glucose_0.1percent_32C_10days	1.007	1.009	-0.024	-0.014	-0.011	0.433209	0.831302
SPBC21D10.08c	YES_glucose_0.1percent_32C_10days	1	0.993	-0.06	-0.041	-0.051	0.0651397	0.685286
SPBC1861.01c	YES_glucose_0.1percent_32C_10days	0.956	0.94	0.238	0.172	0.149	0.140447	0.736475
SPBC4C3.04c	YES_glucose_0.1percent_32C_10days	1.017	1.015	-0.057	-0.009	-0.012	0.344653	0.798753
SPBC31F10.05	YES_glucose_0.1percent_32C_10days	0.939	0.938	-0.237	-0.107	-0.105	0.831207	0.95866
SPBC30D10.10c	YES_glucose_0.1percent_32C_10days	0.948	0.936	0.132	0.05	0.033	0.806878	0.949277
SPBC646.13	YES_glucose_0.1percent_32C_10days	1.167	1.097	0.449	0.231	0.15	0.171207	0.742625
SPBC577.04	YES_glucose_0.1percent_32C_10days	0.91	0.925	-0.064	-0.015	0.008	0.0107393	0.643299
SPBC691.05c	YES_glucose_0.1percent_32C_10days	1.008	1.013	-0.046	-0.013	-0.006	0.651825	0.897169
SPBC83.17	YES_glucose_0.1percent_32C_10days	0.939	0.936	-0.029	-0.008	-0.012	0.191019	0.755607
SPBP8B7.22	YES_glucose_0.1percent_32C_10days	0.784	0.812	-0.331	-0.186	-0.132	0.098298	0.712344
SPCC162.02c	YES_glucose_0.1percent_32C_10days	1.005	1.005	-0.026	-0.018	-0.019	0.816708	0.953133
SPBP19A11.02c	YES_glucose_0.1percent_32C_10days	1	1.007	-0.078	-0.045	-0.035	0.0524051	0.681601
SPCC16C4.04	YES_glucose_0.1percent_32C_10days	1.255	1.266	0.373	0.345	0.357	0.0139269	0.655279
SPCC622.16c	YES_glucose_0.1percent_32C_10days	1.014	1.014	0.079	0.027	0.028	0.353328	0.798753
SPBPB2B2.11	YES_glucose_0.1percent_32C_10days	1.034	1.027	0.044	0.014	0.005	0.586998	0.873424
SPAC1071.08	YES_glucose_0.1percent_32C_10days	0.975	0.972	0.226	0.184	0.18	0.897023	0.979388
SPAC1039.03	YES_glucose_0.1percent_32C_10days	1.003	0.997	-0.039	-0.019	-0.027	0.486441	0.850954
SPAC22G7.06c	YES_glucose_0.1percent_32C_10days	0.878	0.88	-0.151	-0.072	-0.067	0.0232488	0.662964
SPBC2G2.02	YES_glucose_0.1percent_32C_10days	1.146	1.112	0.233	0.111	0.07	0.250833	0.768185
SPCC24B10.20	YES_glucose_0.1percent_32C_10days	1.022	1.017	-0.04	-0.03	-0.038	0.0519526	0.681601
SPAC23E2.01	YES_glucose_0.1percent_32C_10days	0.97	0.994	0.074	0.026	0.062	0.165294	0.742625
SPBC3E7.16c	YES_glucose_0.1percent_32C_10days	0.99	1.017	-0.135	-0.03	0.011	0.352507	0.798753
SPCC965.05c	YES_glucose_0.1percent_32C_10days	1.033	1.04	-0.037	-0.017	-0.007	0.355593	0.798753
SPAC26A3.10	YES_glucose_0.1percent_32C_10days	1.014	1.003	-0.064	-0.031	-0.045	0.647606	0.897169
SPBC839.15c	YES_glucose_0.1percent_32C_10days	0.991	1.023	0.087	0.028	0.076	0.807008	0.949277
SPAC18B11.02c	YES_glucose_0.1percent_32C_10days	1.014	0.996	-0.083	-0.035	-0.06	0.897927	0.979833
SPAC29A4.02c	YES_glucose_0.1percent_32C_10days	1.029	1.036	0.06	0.017	0.028	0.216008	0.760257
SPCC1259.11c	YES_glucose_0.1percent_32C_10days	0.992	0.985	-0.085	-0.061	-0.072	0.768769	0.935102
SPAC227.06	YES_glucose_0.1percent_32C_10days	1.062	1.062	0.078	0.037	0.037	0.960299	0.989603
SPAC2H10.01	YES_glucose_0.1percent_32C_10days	0.987	0.978	-0.081	-0.037	-0.049	0.736815	0.927749
SPCC1795.09	YES_glucose_0.1percent_32C_10days	1.032	1.023	-0.087	-0.033	-0.046	0.299286	0.788544
SPAC4H3.04c	YES_glucose_0.1percent_32C_10days	1.025	1.022	-0.087	-0.062	-0.066	0.586423	0.873424
SPAC328.10c	YES_glucose_0.1percent_32C_10days	0.943	0.922	0.46	0.393	0.362	0.0961887	0.705125
SPCC584.01c	YES_glucose_0.1percent_32C_10days	0.945	0.929	-0.125	-0.033	-0.055	0.59827	0.880358
SPAC890.05	YES_glucose_0.1percent_32C_10days	0.866	0.941	-0.278	-0.005	0.127	0.755451	0.934659
SPAC3F10.02c	YES_glucose_0.1percent_32C_10days	1.042	1.05	0.148	0.075	0.087	0.57326	0.870601
SPAC11G7.01	YES_glucose_0.1percent_32C_10days	0.971	0.965	-0.102	-0.08	-0.089	0.372506	0.801541
SPBC12C2.07c	YES_glucose_0.1percent_32C_10days	0.805	0.757	-0.365	-0.183	-0.26	0.430265	0.831295
SPAC3H5.12c	YES_glucose_0.1percent_32C_10days	0.862	0.861	-0.043	-0.002	-0.002	0.763447	0.934942
SPAC1687.13c	YES_glucose_0.1percent_32C_10days	1.085	1.076	0.04	0.004	-0.009	0.889325	0.976709
SPBC18H10.20c	YES_glucose_0.1percent_32C_10days	1.054	1.058	0.042	0.004	0.01	0.926188	0.985379
SPAC13G7.03	YES_glucose_0.1percent_32C_10days	1.314	1.303	0.256	0.201	0.19	0.0531556	0.681601
SPAC11G7.02	YES_glucose_0.1percent_32C_10days	0.458	0.458	-0.078	-0.078	-0.078	NaN	NaN
SPAC13A11.06	YES_glucose_0.1percent_32C_10days	1.063	1.064	0.029	0.016	0.017	0.0386773	0.681601
SPAC16E8.18	YES_glucose_0.1percent_32C_10days	1.041	1.044	0.051	0.018	0.022	0.414991	0.821315
SPCC1919.03c	YES_glucose_0.1percent_32C_10days	0.607	0.607	-0.643	-0.607	-0.607	0.748882	0.93412
SPAC1D4.11c	YES_glucose_0.1percent_32C_10days	1.014	1.012	-0.066	-0.037	-0.04	0.016033	0.655279
SPCC569.07	YES_glucose_0.1percent_32C_10days	1.023	1.021	-0.01	-0.004	-0.007	0.636499	0.897169
SPAC1635.01	YES_glucose_0.1percent_32C_10days	1.062	1.024	0.167	0.036	-0.013	0.866103	0.96915
SPAC25B8.10	YES_glucose_0.1percent_32C_10days	1.065	1.055	0.105	0.044	0.031	0.844595	0.96163
SPCC895.05	YES_glucose_0.1percent_32C_10days	0.758	0.769	0.69	0.642	0.664	0.00465229	0.578013
SPAC1782.06c	YES_glucose_0.1percent_32C_10days	1.07	1.071	0.172	0.098	0.101	0.660066	0.899097
SPAC3C7.01c	YES_glucose_0.1percent_32C_10days	1.018	1.006	0.117	0.036	0.02	0.852799	0.963025
SPAC3A12.08	YES_glucose_0.1percent_32C_10days	1.017	1.005	0.049	-0.007	-0.024	0.442706	0.833081
SPAC11D3.14c	YES_glucose_0.1percent_32C_10days	1.098	1.102	0.139	0.092	0.098	0.231304	0.768185
SPAC17G8.07	YES_glucose_0.1percent_32C_10days	1.09	1.145	-0.144	0.011	0.087	0.836903	0.959321
SPAC5H10.10	YES_glucose_0.1percent_32C_10days	1.073	1.058	0.132	0.073	0.053	0.399942	0.808744
SPAC683.03	YES_glucose_0.1percent_32C_10days	1.179	1.164	0.198	0.141	0.123	0.0622133	0.683331
SPAC1786.02	YES_glucose_0.1percent_32C_10days	0.999	0.998	-0.05	-0.048	-0.05	0.838512	0.960209
SPAC1952.07	YES_glucose_0.1percent_32C_10days	0.943	0.951	0.02	0.007	0.019	0.102987	0.719031
SPAPYUG7.02c	YES_glucose_0.1percent_32C_10days	0.967	0.983	0.15	0.024	0.052	0.762296	0.93474
SPAC8E11.04c	YES_glucose_0.1percent_32C_10days	1.047	1.039	0.038	0.015	0.004	0.865522	0.969121
SPAC24H6.03	YES_glucose_0.1percent_32C_10days	1.02	1.006	0.1	0.034	0.014	0.685694	0.907266
SPAC1B3.05	YES_glucose_0.1percent_32C_10days	1.063	1.061	0.071	0.031	0.029	0.980591	0.99356
SPBC1683.04	YES_glucose_0.1percent_32C_10days	1.033	1.04	0.084	0.019	0.031	0.135121	0.728628
SPAPB18E9.01	YES_glucose_0.1percent_32C_10days	0.785	0.75	-0.435	-0.21	-0.261	0.341566	0.798753
SPAC3A11.06	YES_glucose_0.1percent_32C_10days	1.048	1.053	0.024	0.004	0.011	0.506004	0.854188
SPAC227.03c	YES_glucose_0.1percent_32C_10days	1.039	1.033	-0.087	-0.057	-0.065	0.456349	0.840289
SPAC4G8.08	YES_glucose_0.1percent_32C_10days	0.952	0.95	-0.112	-0.094	-0.097	0.235425	0.768185
SPBC1347.03	YES_glucose_0.1percent_32C_10days	1.037	1.025	-0.099	-0.033	-0.049	0.462064	0.843112
SPAC56F8.09	YES_glucose_0.1percent_32C_10days	0.943	0.964	0.165	0.092	0.127	0.104749	0.719031
SPAC2E12.03c	YES_glucose_0.1percent_32C_10days	1.036	1.034	-0.017	-0.003	-0.005	0.460939	0.843112
SPBC15D4.15	YES_glucose_0.1percent_32C_10days	0.976	0.955	0.197	0.107	0.077	0.936022	0.985379
SPAC664.02c	YES_glucose_0.1percent_32C_10days	0.788	0.768	-0.296	-0.215	-0.25	0.314585	0.794389
SPAC3G6.03c	YES_glucose_0.1percent_32C_10days	1.023	1.015	0.059	0.006	-0.005	0.843423	0.96163
SPBC16H5.08c	YES_glucose_0.1percent_32C_10days	0.849	0.817	0.146	-0.007	-0.057	0.597864	0.880358
SPAC7D4.02c	YES_glucose_0.1percent_32C_10days	1.034	1.055	0.077	0.043	0.073	0.188108	0.755607
SPAC8C9.04	YES_glucose_0.1percent_32C_10days	1.028	1.02	-0.035	-0.02	-0.031	0.928304	0.985379
SPBC1734.13	YES_glucose_0.1percent_32C_10days	0.903	0.929	0.261	0.089	0.139	0.684821	0.907266
SPAC869.04	YES_glucose_0.1percent_32C_10days	0.992	0.991	-0.028	-0.016	-0.018	0.469102	0.846691
SPBC14C8.03	YES_glucose_0.1percent_32C_10days	0.971	0.981	0.055	0.02	0.035	0.471874	0.847465
SPBC17G9.12c	YES_glucose_0.1percent_32C_10days	1.043	1.042	0.059	0	0	0.754452	0.934659
SPAC926.07c	YES_glucose_0.1percent_32C_10days	1.04	1.054	0.073	0.042	0.062	0.392077	0.808007
SPBC29B5.04c	YES_glucose_0.1percent_32C_10days	1.023	1.029	0.051	0.04	0.048	0.918437	0.982815
SPBC215.05	YES_glucose_0.1percent_32C_10days	0.711	0.719	-0.399	-0.339	-0.323	0.668943	0.901383
SPAP32A8.03c	YES_glucose_0.1percent_32C_10days	1.05	1.056	0.088	0.066	0.074	0.506575	0.854188
SPBC428.08c	YES_glucose_0.1percent_32C_10days	0.975	1	0.343	0.276	0.315	0.040466	0.681601
SPBC115.02c	YES_glucose_0.1percent_32C_10days	0.899	0.906	-0.159	-0.13	-0.119	0.205096	0.760257
SPBC6B1.06c	YES_glucose_0.1percent_32C_10days	0.825	0.81	0.121	0.034	0.009	0.138711	0.733065
SPBC28F2.08c	YES_glucose_0.1percent_32C_10days	1.003	1	-0.092	-0.023	-0.026	0.618244	0.892454
SPBC30B4.02c	YES_glucose_0.1percent_32C_10days	1.026	1.04	0.098	0.019	0.041	0.718564	0.921257
SPBC1348.14c	YES_glucose_0.1percent_32C_10days	1.036	1.042	-0.065	-0.019	-0.01	0.681314	0.905737
SPBC32H8.11	YES_glucose_0.1percent_32C_10days	1.03	1.022	0.078	0.028	0.017	0.165332	0.742625
SPBC1703.08c	YES_glucose_0.1percent_32C_10days	1.009	1.011	-0.023	-0.014	-0.01	0.934228	0.985379
SPBC1198.06c	YES_glucose_0.1percent_32C_10days	0.96	0.948	-0.063	-0.023	-0.04	0.912022	0.981486
SPBC365.10	YES_glucose_0.1percent_32C_10days	0.739	0.725	-0.377	-0.35	-0.377	0.00852086	0.598769
SPBC23E6.05	YES_glucose_0.1percent_32C_10days	1.012	1.011	0.013	0.001	0	0.804047	0.949277
SPBC1921.05	YES_glucose_0.1percent_32C_10days	0.97	0.959	-0.058	-0.029	-0.044	0.574572	0.870601
SPBC4F6.12	YES_glucose_0.1percent_32C_10days	0.882	0.893	0.178	0.104	0.123	0.21176	0.760257
SPBC32F12.08c	YES_glucose_0.1percent_32C_10days	0.967	0.952	0.239	0.186	0.164	0.962812	0.990941
SPBC31E1.01c	YES_glucose_0.1percent_32C_10days	0.997	0.993	-0.049	-0.041	-0.047	0.63053	0.896397
SPBC83.04	YES_glucose_0.1percent_32C_10days	1.018	1.017	0.062	0.016	0.016	0.938241	0.985379
SPBC800.03	YES_glucose_0.1percent_32C_10days	0.937	0.937	-0.175	-0.141	-0.141	0.661674	0.899097
SPBC839.07	YES_glucose_0.1percent_32C_10days	1.045	1.043	0.019	0.012	0.009	0.713657	0.920996
SPBP8B7.26	YES_glucose_0.1percent_32C_10days	1.051	1.031	0.083	0.023	-0.004	0.674426	0.901638
SPCC1827.07c	YES_glucose_0.1percent_32C_10days	1.038	1.028	0.084	0.038	0.025	0.328547	0.797006
SPBP22H7.05c	YES_glucose_0.1percent_32C_10days	1.046	1.044	0.054	0.035	0.032	0.46458	0.844189
SPCC16C4.11	YES_glucose_0.1percent_32C_10days	1.014	1.013	0.075	0.036	0.035	0.489884	0.851263
SPCC63.02c	YES_glucose_0.1percent_32C_10days	1.061	1.057	-0.068	-0.004	-0.008	0.578093	0.870749
SPBPB2B2.12c	YES_glucose_0.1percent_32C_10days	1.038	1.042	0.064	0.014	0.021	0.544299	0.866684
SPAC10F6.04	YES_glucose_0.1percent_32C_10days	0.964	0.971	-0.111	-0.068	-0.057	0.0464295	0.681601
SPAC1039.09	YES_glucose_0.1percent_32C_10days	0.928	0.926	-0.104	-0.074	-0.078	0.0472634	0.681601
SPAC22G7.08	YES_glucose_0.1percent_32C_10days	1.041	1.058	0.106	0.079	0.102	0.729732	0.926775
SPBC2G2.06c	YES_glucose_0.1percent_32C_10days	1.099	1.105	0.24	0.131	0.141	0.213186	0.760257
SPCC306.08c	YES_glucose_0.1percent_32C_10days	0.534	0.502	-1.189	-0.942	-1.012	0.0247639	0.662964
SPAC23G3.02c	YES_glucose_0.1percent_32C_10days	0.992	0.994	-0.049	-0.021	-0.018	0.653693	0.897169
SPBC428.14	YES_glucose_0.1percent_32C_10days	0.995	0.992	-0.062	-0.044	-0.049	0.317276	0.794389
SPAC1071.11	YES_glucose_0.1percent_32C_10days	0.866	0.928	-0.3	-0.076	0.032	0.648336	0.897169
SPAC26A3.16	YES_glucose_0.1percent_32C_10days	1.017	1.014	-0.056	-0.032	-0.036	0.420755	0.823704
SPBC8E4.03	YES_glucose_0.1percent_32C_10days	0.992	0.996	-0.099	-0.086	-0.08	0.0885589	0.699234
SPAC1952.06c	YES_glucose_0.1percent_32C_10days	0.987	0.976	-0.119	-0.064	-0.078	0.486044	0.850954
SPAC29A4.13	YES_glucose_0.1percent_32C_10days	1.028	1.039	-0.089	0.001	0.018	0.815669	0.952459
SPCC126.04c	YES_glucose_0.1percent_32C_10days	0.945	0.966	0.152	0.046	0.081	0.983162	0.993788
SPAC23H3.05c	YES_glucose_0.1percent_32C_10days	1.01	1.009	0.189	0.09	0.091	0.832196	0.95866
SPAC30.02c	YES_glucose_0.1percent_32C_10days	0.908	0.907	-0.077	-0.03	-0.03	0.0702277	0.693022
SPCC18.02	YES_glucose_0.1percent_32C_10days	1.049	1.021	0.137	0.054	0.015	0.0535692	0.681601
SPAC521.03	YES_glucose_0.1percent_32C_10days	1.047	1.042	0.108	0.055	0.048	0.0877958	0.699234
SPAC343.04c	YES_glucose_0.1percent_32C_10days	0.903	0.973	-0.359	-0.096	0.023	0.497582	0.852537
SPCC584.13	YES_glucose_0.1percent_32C_10days	1.076	1.082	0.134	0.074	0.083	0.96473	0.990941
SPAC922.05c	YES_glucose_0.1percent_32C_10days	1.06	1.05	0.113	0.075	0.061	0.398656	0.808744
SPAC3F10.06c	YES_glucose_0.1percent_32C_10days	1.103	1.121	0.171	0.14	0.163	0.190215	0.755607
SPAC1296.03c	YES_glucose_0.1percent_32C_10days	1.075	1.06	0.122	0.058	0.039	0.727531	0.926068
SPAC3H8.03	YES_glucose_0.1percent_32C_10days	0.979	1.024	-0.196	-0.055	0.013	0.734181	0.927199
SPAC16E8.13	YES_glucose_0.1percent_32C_10days	1	1.025	-0.126	-0.036	0	0.133846	0.728628
SPBC19C7.08c	YES_glucose_0.1percent_32C_10days	1.026	1.023	-0.074	-0.033	-0.037	0.483829	0.850954
SPAC13G7.07	YES_glucose_0.1percent_32C_10days	0.891	0.917	-0.164	-0.031	0.014	0.52299	0.855245
SPCC1259.03	YES_glucose_0.1percent_32C_10days	0.779	0.747	0.726	0.507	0.455	0.0757574	0.693022
SPAC11H11.04	YES_glucose_0.1percent_32C_10days	1.106	1.096	0.11	0.035	0.023	0.874242	0.970837
SPAC13G6.10c	YES_glucose_0.1percent_32C_10days	0.886	0.896	0.403	0.316	0.334	0.0627864	0.683331
SPAC1751.04	YES_glucose_0.1percent_32C_10days	1.062	1.072	0.096	0.065	0.078	0.090025	0.699234
SPCC24B10.03	YES_glucose_0.1percent_32C_10days	1.06	1.061	-0.057	-0.008	-0.006	0.134586	0.728628
SPAC144.02	YES_glucose_0.1percent_32C_10days	1.19	1.217	0.34	0.281	0.315	0.0369348	0.681601
SPAC1F7.09c	YES_glucose_0.1percent_32C_10days	1.064	1.087	-0.216	-0.068	-0.033	0.401139	0.808744
SPAC1F8.08	YES_glucose_0.1percent_32C_10days	1	1.013	-0.102	-0.016	0.004	0.768236	0.935102
SPCC61.05	YES_glucose_0.1percent_32C_10days	1.004	1.001	-0.068	-0.042	-0.046	0.622366	0.892454
SPAC167.01	YES_glucose_0.1percent_32C_10days	1.011	0.996	-0.094	-0.052	-0.073	0.652519	0.897169
SPAC23G3.07c	YES_glucose_0.1percent_32C_10days	1.004	1.015	-0.097	-0.011	0.006	0.950509	0.986438
SPAC25G10.06	YES_glucose_0.1percent_32C_10days	0.81	0.84	-0.177	-0.008	0.05	0.056053	0.681601
SPCC895.09c	YES_glucose_0.1percent_32C_10days	1.042	1.032	-0.138	-0.047	-0.059	0.717018	0.920996
SPAC17A2.05	YES_glucose_0.1percent_32C_10days	1.039	1.034	-0.098	-0.006	-0.011	0.456054	0.840289
SPAC3F10.13	YES_glucose_0.1percent_32C_10days	1.071	1.081	-0.059	-0.024	-0.011	0.906517	0.980479
SPAC3G6.02	YES_glucose_0.1percent_32C_10days	0.758	0.758	-0.202	-0.184	-0.184	NaN	NaN
SPAC11E3.14	YES_glucose_0.1percent_32C_10days	1.028	1.005	0.076	-0.001	-0.032	0.316537	0.794389
SPAC17H9.08	YES_glucose_0.1percent_32C_10days	0.901	0.909	-0.089	-0.027	-0.013	0.938039	0.985379
SPAC631.02	YES_glucose_0.1percent_32C_10days	0.872	0.895	0.096	0.027	0.067	0.245183	0.768185
SPAC694.03	YES_glucose_0.1percent_32C_10days	1.029	1.013	0.12	0.063	0.041	0.449018	0.836288
SPAC17H9.01	YES_glucose_0.1percent_32C_10days	1.09	1.119	0.13	0.082	0.122	0.252653	0.768185
SPAC1952.16	YES_glucose_0.1percent_32C_10days	1.066	1.094	0.081	0.027	0.066	0.652365	0.897169
SPBC106.11c	YES_glucose_0.1percent_32C_10days	1.062	1.079	0.119	0.065	0.088	0.53058	0.859773
SPAC8E11.07c	YES_glucose_0.1percent_32C_10days	0.873	0.896	-0.099	0.002	0.041	0.10881	0.722422
SPAC26A3.09c	YES_glucose_0.1percent_32C_10days	1.139	1.138	-0.048	-0.03	-0.032	0.464034	0.844189
SPBC1683.12	YES_glucose_0.1percent_32C_10days	1.054	1.075	-0.055	0.008	0.037	0.286962	0.781205
SPAPB18E9.04c	YES_glucose_0.1percent_32C_10days	1.084	1.104	0.169	0.074	0.103	0.523744	0.855245
SPAC3C7.08c	YES_glucose_0.1percent_32C_10days	0.858	0.853	-0.536	-0.182	-0.163	0.343393	0.798753
SPAC227.10	YES_glucose_0.1percent_32C_10days	1.047	1.058	-0.155	-0.08	-0.064	0.200611	0.759887
SPAC4G9.02	YES_glucose_0.1percent_32C_10days	0.977	0.978	-0.06	-0.032	-0.03	0.48754	0.850954
SPAC227.07c	YES_glucose_0.1percent_32C_10days	1.104	1.073	0.196	0.078	0.039	0.685853	0.907266
SPBC1347.12	YES_glucose_0.1percent_32C_10days	1.051	1.031	0.054	-0.009	-0.036	0.436602	0.832421
SPAC57A10.03	YES_glucose_0.1percent_32C_10days	1.017	1.025	-0.055	-0.018	-0.007	0.0890627	0.699234
SPAC2F3.05c	YES_glucose_0.1percent_32C_10days	1.065	1.072	0.061	0.028	0.038	0.52978	0.859602
SPBC1604.08c	YES_glucose_0.1percent_32C_10days	0.895	0.866	-0.138	-0.072	-0.116	0.197016	0.759887
SPAC688.14	YES_glucose_0.1percent_32C_10days	0.992	0.985	-0.074	-0.013	-0.022	0.472993	0.847465
SPAC3G6.06c	YES_glucose_0.1percent_32C_10days	0.886	0.881	0.118	0.062	0.055	0.104615	0.719031
SPBC16H5.11c	YES_glucose_0.1percent_32C_10days	0.968	0.957	0.053	0.019	0.002	0.352457	0.798753
SPAC7D4.12c	YES_glucose_0.1percent_32C_10days	0.964	0.983	0.076	0.045	0.073	0.199959	0.759887
SPAC8E11.05c	YES_glucose_0.1percent_32C_10days	1.037	1.056	0.31	0.279	0.306	0.072313	0.693022
SPBC1773.03c	YES_glucose_0.1percent_32C_10days	1.027	1.025	-0.052	-0.036	-0.039	0.363083	0.800977
SPAC869.05c	YES_glucose_0.1percent_32C_10days	1.018	1.017	0.049	0.032	0.031	0.881	0.974224
SPBC14C8.05c	YES_glucose_0.1percent_32C_10days	1.055	1.048	0.09	0.057	0.047	0.778278	0.940043
SPBC1861.03	YES_glucose_0.1percent_32C_10days	1.143	1.128	0.301	0.256	0.237	0.00311108	0.578013
SPAC926.09c	YES_glucose_0.1percent_32C_10days	1.027	1.028	0.079	0.045	0.047	0.195131	0.75921
SPBC2D10.17	YES_glucose_0.1percent_32C_10days	1.032	1.023	0.072	0.037	0.025	0.199025	0.759887
SPBC215.06c	YES_glucose_0.1percent_32C_10days	1.077	1.098	0.148	0.094	0.123	0.172057	0.742625
SPAPB1A10.03	YES_glucose_0.1percent_32C_10days	0.963	0.972	0.109	0.07	0.084	0.573551	0.870601
SPBC428.11	YES_glucose_0.1percent_32C_10days	0.895	0.881	-0.156	-0.105	-0.126	0.215227	0.760257
SPBC21D10.09c	YES_glucose_0.1percent_32C_10days	0.88	0.886	-0.142	-0.108	-0.099	0.495314	0.852536
SPBC119.06	YES_glucose_0.1percent_32C_10days	1.058	1.049	0.113	0.062	0.05	0.421593	0.824866
SPBC9B6.11c	YES_glucose_0.1percent_32C_10days	1.002	1.012	0.139	0.121	0.136	0.776468	0.939217
SPBC29A10.09c	YES_glucose_0.1percent_32C_10days	1.072	1.048	-0.069	-0.03	-0.062	0.453691	0.839975
SPBC30B4.03c	YES_glucose_0.1percent_32C_10days	1.169	1.113	0.48	0.32	0.254	0.157971	0.738911
SPBC14C8.04	YES_glucose_0.1percent_32C_10days	1.076	1.068	0.109	0.042	0.033	0.650113	0.897169
SPAC6G9.10c	YES_glucose_0.1percent_32C_10days	0.951	0.943	0.24	0.143	0.133	0.477328	0.848387
SPBC32H8.13c	YES_glucose_0.1percent_32C_10days	1.002	0.999	-0.09	-0.047	-0.051	0.885642	0.9761
SPBC1703.11	YES_glucose_0.1percent_32C_10days	0.979	0.976	-0.123	-0.077	-0.081	0.487646	0.850954
SPBC146.06c	YES_glucose_0.1percent_32C_10days	1.035	1.051	0.082	0.049	0.071	0.137455	0.732156
SPBC36B7.08c	YES_glucose_0.1percent_32C_10days	0.948	0.938	0.101	0.058	0.042	0.79272	0.945829
SPBC23G7.15c	YES_glucose_0.1percent_32C_10days	0.86	0.815	-0.299	-0.157	-0.226	0.250191	0.768185
SPBC215.08c	YES_glucose_0.1percent_32C_10days	0.895	0.872	0.122	0.002	-0.032	0.419787	0.823704
SPBC543.02c	YES_glucose_0.1percent_32C_10days	1.027	1.038	-0.04	0.006	0.021	0.972231	0.99221
SPBC32H8.05	YES_glucose_0.1percent_32C_10days	1.017	1.018	-0.05	-0.028	-0.026	0.0605541	0.681601
SPBC31E1.02c	YES_glucose_0.1percent_32C_10days	0.959	0.977	0.119	0.019	0.048	0.691537	0.908685
SPBC660.10	YES_glucose_0.1percent_32C_10days	0.812	0.804	-0.263	-0.217	-0.23	0.847703	0.963025
SPBC83.19c	YES_glucose_0.1percent_32C_10days	0.992	0.997	-0.137	-0.055	-0.046	0.454891	0.840289
SPBC887.04c	YES_glucose_0.1percent_32C_10days	0.985	0.979	0.17	0.091	0.083	0.103808	0.719031
SPBC887.10	YES_glucose_0.1percent_32C_10days	1.075	1.108	0.147	0.043	0.091	0.759335	0.934659
SPBP8B7.31	YES_glucose_0.1percent_32C_10days	1.059	1.044	0.098	0.02	0	0.770497	0.93596
SPCC1840.05c	YES_glucose_0.1percent_32C_10days	0.964	0.97	-0.095	-0.051	-0.041	0.80258	0.949277
SPBP35G2.06c	YES_glucose_0.1percent_32C_10days	1.014	1.005	0.039	-0.003	-0.016	0.835995	0.959321
SPCC24B10.17	YES_glucose_0.1percent_32C_10days	1.012	0.995	0.086	0.019	-0.004	0.5251	0.855245
SPBPJ4664.03	YES_glucose_0.1percent_32C_10days	1.061	1.065	0.083	0.021	0.027	0.575619	0.870601
SPAC10F6.06	YES_glucose_0.1percent_32C_10days	1.007	1.008	-0.15	-0.085	-0.083	0.0837366	0.699234
SPAC1071.03c	YES_glucose_0.1percent_32C_10days	1.004	1.015	-0.167	-0.087	-0.07	0.10821	0.722422
SPAC22H10.04	YES_glucose_0.1percent_32C_10days	1.213	1.189	0.313	0.25	0.221	0.023634	0.662964
SPBC2G5.04c	YES_glucose_0.1percent_32C_10days	1.058	1.035	0.171	0.039	0.01	0.803981	0.949277
SPCC31H12.05c	YES_glucose_0.1percent_32C_10days	1.054	1.054	-0.104	-0.006	-0.006	NaN	NaN
SPAC23G3.05c	YES_glucose_0.1percent_32C_10days	1.047	1.045	-0.094	-0.004	-0.005	0.426824	0.829567
SPBC4C3.06	YES_glucose_0.1percent_32C_10days	1.035	1.033	-0.09	-0.033	-0.035	0.346055	0.798753
SPAC10F6.05c	YES_glucose_0.1percent_32C_10days	0.998	1.003	0.091	0.048	0.057	0.217474	0.760257
SPAC26F1.02	YES_glucose_0.1percent_32C_10days	1.072	1.055	0.099	0.029	0.006	0.490731	0.851263
SPBP35G2.08c	YES_glucose_0.1percent_32C_10days	0.874	0.878	-0.175	-0.111	-0.104	0.00616182	0.578013
SPAC19A8.02	YES_glucose_0.1percent_32C_10days	1.035	1.039	0.015	0.005	0.01	0.766438	0.935102
SPAC2C4.14c	YES_glucose_0.1percent_32C_10days	0.974	0.99	-0.091	-0.03	-0.005	0.906004	0.980479
SPCC126.09	YES_glucose_0.1percent_32C_10days	0.934	0.94	-0.088	-0.037	-0.027	0.400664	0.808744
SPAC24B11.06c	YES_glucose_0.1percent_32C_10days	1.06	1.057	0.067	0.044	0.04	0.124922	0.728628
SPAC30.03c	YES_glucose_0.1percent_32C_10days	0.998	0.991	-0.045	-0.035	-0.045	0.688295	0.907266
SPCC18.17c	YES_glucose_0.1percent_32C_10days	0.866	0.832	0.285	0.146	0.092	0.489698	0.851263
SPAC56F8.05c	YES_glucose_0.1percent_32C_10days	1.059	1.057	0.098	0.045	0.043	0.258501	0.773913
SPAC343.07	YES_glucose_0.1percent_32C_10days	1.03	0.993	0.134	-0.019	-0.067	0.71727	0.920996
SPCC737.04	YES_glucose_0.1percent_32C_10days	1.036	1.029	-0.105	-0.053	-0.062	0.308038	0.791444
SPAC9G1.07	YES_glucose_0.1percent_32C_10days	1.006	0.98	0.117	-0.006	-0.041	0.602872	0.881287
SPAC12G12.09	YES_glucose_0.1percent_32C_10days	1.007	1.001	-0.189	-0.047	-0.051	0.576653	0.870601
SPBC15D4.09c	YES_glucose_0.1percent_32C_10days	0.937	0.945	-0.117	-0.084	-0.072	0.147456	0.738482
SPAC3H8.07c	YES_glucose_0.1percent_32C_10days	0.982	1.001	0.194	0.114	0.143	0.747854	0.93412
SPAC17A2.02c	YES_glucose_0.1percent_32C_10days	0.907	0.91	-0.171	-0.14	-0.134	0.0360273	0.681601
SPBC19C7.12c	YES_glucose_0.1percent_32C_10days	0.993	0.99	-0.064	-0.044	-0.048	0.0981444	0.712344
SPAC13G7.11	YES_glucose_0.1percent_32C_10days	0.99	0.986	-0.092	-0.036	-0.04	0.880039	0.973753
SPCC126.06	YES_glucose_0.1percent_32C_10days	1.056	1.031	0.168	0.035	0.003	0.418799	0.823704
SPAC1250.05	YES_glucose_0.1percent_32C_10days	1.073	1.03	0.233	0.062	0.009	0.932774	0.985379
SPAC1782.04	YES_glucose_0.1percent_32C_10days	0.995	0.992	-0.068	-0.031	-0.035	0.364714	0.801541
SPCC24B10.13	YES_glucose_0.1percent_32C_10days	1.102	1.1	0.137	0.099	0.097	0.0183651	0.655279
SPAC144.05	YES_glucose_0.1percent_32C_10days	1.041	1.029	0.088	0.025	0.009	0.262874	0.774836
SPAC20G4.03c	YES_glucose_0.1percent_32C_10days	1.006	1.009	-0.049	-0.02	-0.016	0.717167	0.920996
SPAC212.03	YES_glucose_0.1percent_32C_10days	1.053	1.05	0.104	0.062	0.058	0.913705	0.981486
SPCC613.02	YES_glucose_0.1percent_32C_10days	1.016	1.019	0.037	0.03	0.035	0.991524	0.996337
SPAC167.07c	YES_glucose_0.1percent_32C_10days	0.994	1.011	-0.088	-0.02	0.006	0.122311	0.728628
SPAC23H3.13c	YES_glucose_0.1percent_32C_10days	0.707	0.665	0.545	0.226	0.159	0.910924	0.981486
SPAC27E2.01	YES_glucose_0.1percent_32C_10days	0.972	0.958	0.111	0.049	0.029	0.249256	0.768185
SPCC965.06	YES_glucose_0.1percent_32C_10days	1.038	1.036	-0.029	-0.004	-0.006	0.225685	0.763666
SPAC17A2.06c	YES_glucose_0.1percent_32C_10days	0.929	0.961	-0.245	-0.068	-0.014	0.514144	0.854188
SPAC3G9.05	YES_glucose_0.1percent_32C_10days	1.008	1.007	-0.066	-0.026	-0.026	0.321686	0.794389
SPAC3G6.13c	YES_glucose_0.1percent_32C_10days	0.998	0.993	-0.032	-0.025	-0.032	0.525506	0.855245
SPAC12B10.16c	YES_glucose_0.1percent_32C_10days	1.011	1.003	-0.058	-0.041	-0.053	0.883844	0.975724
SPAC17H9.11	YES_glucose_0.1percent_32C_10days	1.003	1	-0.08	-0.067	-0.071	0.059476	0.681601
SPAC637.13c	YES_glucose_0.1percent_32C_10days	1.001	0.996	-0.074	-0.02	-0.027	0.195064	0.75921
SPAC6B12.06c	YES_glucose_0.1percent_32C_10days	1.006	1.006	-0.039	-0.035	-0.035	0.410692	0.818665
SPAC17H9.06c	YES_glucose_0.1percent_32C_10days	0.978	0.98	-0.127	-0.085	-0.082	0.161589	0.742358
SPAC19A8.03	YES_glucose_0.1percent_32C_10days	1.015	1.017	-0.022	0.001	0.004	0.0822922	0.699234
SPBC106.19	YES_glucose_0.1percent_32C_10days	0.829	0.819	-0.204	-0.155	-0.172	0.263632	0.774836
SPACUNK4.19	YES_glucose_0.1percent_32C_10days	1.025	1.025	-0.077	-0.035	-0.035	0.107034	0.722422
SPAC26F1.01	YES_glucose_0.1percent_32C_10days	1.047	1.051	0.044	0.012	0.017	0.875308	0.971382
SPAC1F3.05	YES_glucose_0.1percent_32C_10days	1.059	1.044	0.074	0.01	-0.01	0.889545	0.976709
SPBC1685.15c	YES_glucose_0.1percent_32C_10days	0.994	1.011	0.08	0.031	0.056	0.391836	0.808007
SPAPB1E7.07	YES_glucose_0.1percent_32C_10days	1.017	1.031	0.091	0.063	0.083	0.627842	0.895364
SPAC3C7.13c	YES_glucose_0.1percent_32C_10days	1.035	1.022	0.083	0.018	0	0.793566	0.945949
SPAC22A12.14c	YES_glucose_0.1percent_32C_10days	1.057	1.06	-0.032	-0.007	-0.003	0.411163	0.81869
SPBC21C3.02c	YES_glucose_0.1percent_32C_10days	0.841	0.83	-0.311	-0.15	-0.163	0.356213	0.798753
SPAC4G9.14	YES_glucose_0.1percent_32C_10days	0.956	0.955	-0.021	-0.014	-0.015	0.472442	0.847465
SPAC22H12.01c	YES_glucose_0.1percent_32C_10days	1.076	1.046	0.203	0.083	0.044	0.340942	0.798753
SPBC13E7.09	YES_glucose_0.1percent_32C_10days	1.013	1.007	-0.046	-0.009	-0.017	0.105148	0.719031
SPAC57A7.05	YES_glucose_0.1percent_32C_10days	0.996	0.999	0.026	0.018	0.023	0.91635	0.982195
SPAC2G11.07c	YES_glucose_0.1percent_32C_10days	1.003	1.025	0.109	0.042	0.076	0.699435	0.914108
SPBC1683.13c	YES_glucose_0.1percent_32C_10days	1.041	1.009	0.144	0.057	0.014	0.175625	0.745084
SPAC694.02	YES_glucose_0.1percent_32C_10days	1.057	1.019	0.282	0.149	0.1	0.375731	0.801541
SPAC3H1.07	YES_glucose_0.1percent_32C_10days	1.079	1.092	0.164	0.106	0.125	0.0855684	0.699234
SPBC16H5.13	YES_glucose_0.1percent_32C_10days	0.946	0.948	-0.117	-0.084	-0.081	0.800739	0.94814
SPAC806.08c	YES_glucose_0.1percent_32C_10days	0.981	0.99	-0.048	-0.022	-0.01	0.836926	0.959321
SPAC8E11.10	YES_glucose_0.1percent_32C_10days	1.067	1.056	0.115	0.06	0.045	0.575956	0.870601
SPBC1773.16c	YES_glucose_0.1percent_32C_10days	1.057	1.037	0.09	0.029	0.002	0.0685657	0.693022
SPAC890.03	YES_glucose_0.1percent_32C_10days	1.106	1.103	0.108	0.097	0.093	0.667819	0.90124
SPBC14F5.03c	YES_glucose_0.1percent_32C_10days	1.029	1.027	0.064	0.024	0.021	0.57909	0.871085
SPBC18H10.05	YES_glucose_0.1percent_32C_10days	1.048	1.057	0.063	0.015	0.028	0.216176	0.760257
SPAC977.15	YES_glucose_0.1percent_32C_10days	0.999	0.995	-0.045	-0.005	-0.011	0.685549	0.907266
SPBC30D10.13c	YES_glucose_0.1percent_32C_10days	1.038	1.025	0.053	0.006	-0.013	0.871891	0.97078
SPBC215.07c	YES_glucose_0.1percent_32C_10days	1.04	1.04	-0.053	-0.009	-0.009	0.49691	0.852537
SPAPB1A11.04c	YES_glucose_0.1percent_32C_10days	1.017	1.033	0.103	0.073	0.096	0.642876	0.897169
SPBC428.17c	YES_glucose_0.1percent_32C_10days	1.008	1.001	0.045	0.02	0.009	0.33998	0.798753
SPBC21H7.04	YES_glucose_0.1percent_32C_10days	0.841	0.93	-0.523	-0.157	0.011	0.382965	0.804984
SPBC119.12	YES_glucose_0.1percent_32C_10days	0.702	0.658	-0.202	-0.054	-0.137	0.24044	0.768185
SPBP22H7.04	YES_glucose_0.1percent_32C_10days	0.972	0.975	-0.057	-0.014	-0.009	0.931078	0.985379
SPBC29A10.14	YES_glucose_0.1percent_32C_10days	1	1.011	-0.076	-0.03	-0.013	0.536572	0.862431
SPBC30B4.06c	YES_glucose_0.1percent_32C_10days	0.625	0.786	-1.635	-0.707	-0.245	0.429153	0.831295
SPBC1539.06	YES_glucose_0.1percent_32C_10days	0.831	0.838	0.193	0.161	0.173	0.71514	0.920996
SPAC821.03c	YES_glucose_0.1percent_32C_10days	1.065	1.067	0.123	0.085	0.088	0.319856	0.794389
SPBC336.03	YES_glucose_0.1percent_32C_10days	0.795	0.794	0.178	0.166	0.164	0.329752	0.797006
SPBC1709.18	YES_glucose_0.1percent_32C_10days	1.027	0.993	0.197	0.083	0.037	0.971921	0.992193
SPBC146.13c	YES_glucose_0.1percent_32C_10days	0.571	0.506	-0.607	-0.344	-0.488	0.601674	0.881287
SPBC3E7.05c	YES_glucose_0.1percent_32C_10days	0.923	0.935	-0.261	-0.139	-0.117	0.722807	0.923027
SPBC23G7.16	YES_glucose_0.1percent_32C_10days	0.826	0.805	-0.323	-0.234	-0.268	0.0582959	0.681601
SPBC215.13	YES_glucose_0.1percent_32C_10days	0.979	0.974	-0.06	-0.017	-0.024	0.567409	0.870601
SPBC543.05c	YES_glucose_0.1percent_32C_10days	0.998	1.012	-0.077	-0.017	0.004	0.23232	0.768185
SPBC337.09	YES_glucose_0.1percent_32C_10days	0.79	0.817	0.264	0.152	0.205	0.636677	0.897169
SPBC354.09c	YES_glucose_0.1percent_32C_10days	1.015	1.008	-0.058	-0.029	-0.038	0.873412	0.970837
SPBC660.12c	YES_glucose_0.1percent_32C_10days	1.022	1.022	-0.013	-0.008	-0.008	0.302421	0.788544
SPBC839.14c	YES_glucose_0.1percent_32C_10days	1.033	1.049	0.043	0.016	0.038	0.262067	0.774836
SPBC947.10	YES_glucose_0.1percent_32C_10days	0.713	0.713	-0.779	-0.067	-0.067	NaN	NaN
SPBC8D2.01	YES_glucose_0.1percent_32C_10days	0.961	0.929	0.193	0.008	-0.035	0.683181	0.906928
SPBPB2B2.02	YES_glucose_0.1percent_32C_10days	1.056	1.056	0.091	0.039	0.04	0.13296	0.728628
SPCC188.08c	YES_glucose_0.1percent_32C_10days	1.05	1.05	0.093	0.068	0.068	0.211288	0.760257
SPBP35G2.10	YES_glucose_0.1percent_32C_10days	1.089	1.093	0.174	0.07	0.078	0.216833	0.760257
SPCC24B10.18	YES_glucose_0.1percent_32C_10days	0.986	0.962	0.177	0.049	0.016	0.540774	0.865494
SPCC663.15c	YES_glucose_0.1percent_32C_10days	1.016	1.002	-0.06	-0.015	-0.034	0.713707	0.920996
SPCC1020.12c	YES_glucose_0.1percent_32C_10days	1.03	1.024	0.046	0.025	0.017	0.136136	0.72905
SPAC10F6.16	YES_glucose_0.1percent_32C_10days	1.014	1.013	-0.081	-0.056	-0.057	0.412629	0.819395
SPAC1093.03	YES_glucose_0.1percent_32C_10days	1.013	1.001	0.177	0.078	0.062	0.453522	0.839975
SPAC22H10.07	YES_glucose_0.1percent_32C_10days	0.914	0.849	0.533	0.3	0.203	0.324522	0.795869
SPAC23G3.08c	YES_glucose_0.1percent_32C_10days	1.056	1.038	0.091	0.025	0.001	0.959799	0.98939
SPBC530.08	YES_glucose_0.1percent_32C_10days	1.072	1.041	-0.076	-0.023	-0.064	0.647054	0.897169
SPAC10F6.15	YES_glucose_0.1percent_32C_10days	1.074	1.062	0.082	0.025	0.009	0.26828	0.776999
SPAC26F1.08c	YES_glucose_0.1percent_32C_10days	0.968	0.963	-0.215	-0.118	-0.123	0.4561	0.840289
SPBP4G3.02	YES_glucose_0.1percent_32C_10days	0.974	0.965	-0.158	-0.104	-0.117	0.126041	0.728628
SPAC1B3.03c	YES_glucose_0.1percent_32C_10days	0.98	0.964	0.116	0.068	0.044	0.610841	0.887231
SPAC2C4.17c	YES_glucose_0.1percent_32C_10days	1.01	1.01	-0.018	-0.015	-0.015	0.544074	0.866684
SPCC1322.02	YES_glucose_0.1percent_32C_10days	1.037	1.041	-0.041	-0.031	-0.026	0.55494	0.870428
SPAC24B11.13	YES_glucose_0.1percent_32C_10days	1.006	1.003	0.199	0.158	0.154	0.000547624	0.308221
SPAC30.04c	YES_glucose_0.1percent_32C_10days	1.02	1.018	0.071	0.007	0.005	0.328859	0.797006
SPCC1827.02c	YES_glucose_0.1percent_32C_10days	0.959	0.963	-0.137	-0.067	-0.06	0.156695	0.738482
SPAC589.03c	YES_glucose_0.1percent_32C_10days	0.998	0.984	-0.07	-0.04	-0.06	0.444625	0.834034
SPAC343.11c	YES_glucose_0.1percent_32C_10days	1.048	1.061	0.107	0.086	0.104	0.513353	0.854188
SPCC74.02c	YES_glucose_0.1percent_32C_10days	0.938	0.94	-0.133	-0.07	-0.066	0.0705208	0.693022
SPAC9G1.08c	YES_glucose_0.1percent_32C_10days	0.971	1.006	-0.137	-0.019	0.035	0.408884	0.818275
SPAC3G6.11	YES_glucose_0.1percent_32C_10days	0.926	0.946	-0.33	-0.156	-0.119	0.278607	0.780928
SPAC13F5.04c	YES_glucose_0.1percent_32C_10days	1.018	1.003	-0.113	-0.072	-0.093	0.749372	0.93412
SPAC4A8.05c	YES_glucose_0.1percent_32C_10days	0.934	0.96	0.36	0.251	0.295	0.37442	0.801541
SPAC17A2.13c	YES_glucose_0.1percent_32C_10days	1.187	1.224	0.224	0.151	0.198	0.16181	0.742358
SPBC20F10.07	YES_glucose_0.1percent_32C_10days	0.952	0.949	-0.106	-0.093	-0.098	0.359757	0.799256
SPAC1420.03	YES_glucose_0.1percent_32C_10days	1.092	1.11	-0.061	-0.006	0.018	0.773368	0.937468
SPCC132.02	YES_glucose_0.1percent_32C_10days	1.082	1.087	0.178	0.151	0.159	0.0587355	0.681601
SPAC12B10.07	YES_glucose_0.1percent_32C_10days	0.996	1.006	0.123	0.104	0.118	0.572556	0.870601
SPAC144.17c	YES_glucose_0.1percent_32C_10days	1.116	1.083	0.213	0.122	0.08	0.337434	0.798753
SPCC320.03	YES_glucose_0.1percent_32C_10days	1.119	1.139	0.201	0.141	0.168	0.986763	0.994696
SPAC1486.04c	YES_glucose_0.1percent_32C_10days	0.731	0.769	-0.587	-0.42	-0.342	0.0154397	0.655279
SPAC20G8.04c	YES_glucose_0.1percent_32C_10days	0.94	0.915	-0.183	-0.142	-0.18	0.937842	0.985379
SPAC227.14	YES_glucose_0.1percent_32C_10days	1.027	1.007	0.062	0.004	-0.023	0.773682	0.937468
SPCC63.04	YES_glucose_0.1percent_32C_10days	1.026	1.016	-0.037	-0.012	-0.026	0.312789	0.794389
SPAC1687.05	YES_glucose_0.1percent_32C_10days	1.002	0.963	0.268	0.147	0.092	0.635706	0.897154
SPAC25A8.02	YES_glucose_0.1percent_32C_10days	0.997	0.997	-0.063	-0.044	-0.044	0.012839	0.655279
SPAC27F1.10	YES_glucose_0.1percent_32C_10days	1.009	1.027	-0.09	-0.034	-0.008	0.111764	0.722422
SPCC965.11c	YES_glucose_0.1percent_32C_10days	1.016	0.994	-0.107	-0.073	-0.104	0.579004	0.871085
SPAC17A2.12	YES_glucose_0.1percent_32C_10days	0.965	0.973	-0.129	-0.092	-0.079	0.253269	0.768455
SPAC3H5.04	YES_glucose_0.1percent_32C_10days	0.994	0.993	-0.052	-0.003	-0.004	0.0696701	0.693022
SPAC4D7.11	YES_glucose_0.1percent_32C_10days	0.714	0.714	-0.85	-0.068	-0.068	NaN	NaN
SPAC139.01c	YES_glucose_0.1percent_32C_10days	1.02	1.035	0.128	0.021	0.046	0.629883	0.896397
SPAC17H9.14c	YES_glucose_0.1percent_32C_10days	1.104	1.075	0.158	0.077	0.04	0.32637	0.797006
SPAC6G10.03c	YES_glucose_0.1percent_32C_10days	1.02	1.021	0.05	0.018	0.02	0.399236	0.808744
SPAC6B12.15	YES_glucose_0.1percent_32C_10days	0.902	0.918	0.323	0.198	0.228	0.915171	0.982195
SPAC17H9.10c	YES_glucose_0.1percent_32C_10days	0.896	0.899	-0.179	-0.084	-0.077	0.0939158	0.704809
SPAC19A8.04	YES_glucose_0.1percent_32C_10days	0.824	0.835	-0.332	-0.283	-0.263	0.123191	0.728628
SPBC11B10.07c	YES_glucose_0.1percent_32C_10days	0.987	0.987	0.054	0.01	0.011	0.555505	0.870601
SPAP11E10.01	YES_glucose_0.1percent_32C_10days	1.011	1.001	-0.086	-0.03	-0.043	0.0926376	0.702712
SPAC26F1.09	YES_glucose_0.1percent_32C_10days	1.07	1.082	0.085	0.062	0.078	0.519793	0.854284
SPAC1F3.06c	YES_glucose_0.1percent_32C_10days	1.053	1.054	-0.118	-0.056	-0.054	0.685697	0.907266
SPBC16A3.19	YES_glucose_0.1percent_32C_10days	1.074	1.123	0.355	0.268	0.336	0.109802	0.722422
SPAPB21F2.03	YES_glucose_0.1percent_32C_10days	1.018	1.024	-0.069	-0.037	-0.027	0.0846799	0.699234
SPAC3G6.09c	YES_glucose_0.1percent_32C_10days	1.08	1.054	-0.138	-0.041	-0.074	0.394634	0.808174
SPAC22E12.14c	YES_glucose_0.1percent_32C_10days	1.026	1.016	0.168	0.117	0.102	0.365665	0.801541
SPBC23G7.06c	YES_glucose_0.1percent_32C_10days	0.791	0.718	-0.683	-0.364	-0.469	0.299903	0.788544
SPAC4G9.20c	YES_glucose_0.1percent_32C_10days	0.411	0.412	-1.339	-1.298	-1.293	0.000130984	0.110583
SPAC23C11.04c	YES_glucose_0.1percent_32C_10days	0.901	0.889	0.154	0.09	0.072	0.950212	0.986433
SPBC13E7.11	YES_glucose_0.1percent_32C_10days	0.894	0.885	-0.131	-0.085	-0.099	0.320658	0.794389
SPAC30C2.02	YES_glucose_0.1percent_32C_10days	1.061	1.045	0.116	0.046	0.025	0.553733	0.86963
SPBC1685.01	YES_glucose_0.1percent_32C_10days	1.128	1.155	0.317	0.241	0.277	0.107931	0.722422
SPAC694.06c	YES_glucose_0.1percent_32C_10days	0.988	0.974	0.184	0.133	0.113	0.0532742	0.681601
SPAC3H1.11	YES_glucose_0.1percent_32C_10days	1.045	1.036	0.038	0.014	0.002	0.847605	0.963025
SPBC1703.04	YES_glucose_0.1percent_32C_10days	0.989	0.987	0.129	0.074	0.071	0.110864	0.722422
SPAC9E9.05	YES_glucose_0.1percent_32C_10days	1.02	1.032	-0.079	-0.02	-0.003	0.507388	0.854188
SPBC1778.03c	YES_glucose_0.1percent_32C_10days	0.993	0.993	-0.055	-0.032	-0.032	0.0639817	0.683331
SPBC1683.03c	YES_glucose_0.1percent_32C_10days	1.112	1.125	0.147	0.066	0.084	0.860341	0.967189
SPAC9G1.02	YES_glucose_0.1percent_32C_10days	1.086	1.107	0.092	0.055	0.082	0.860834	0.967189
SPBC32F12.05c	YES_glucose_0.1percent_32C_10days	0.953	0.915	0.201	0.084	0.027	0.477158	0.848387
SPBC216.02	YES_glucose_0.1percent_32C_10days	1.028	1.007	0.071	0.001	-0.027	0.488348	0.850954
SPAPB24D3.01	YES_glucose_0.1percent_32C_10days	0.98	0.969	-0.046	-0.029	-0.045	0.33168	0.797006
SPBC4F6.11c	YES_glucose_0.1percent_32C_10days	1.072	1.076	0.085	0.056	0.062	0.146076	0.738482
SPBC23G7.11	YES_glucose_0.1percent_32C_10days	0.901	0.952	-0.39	-0.138	-0.048	0.426299	0.829269
SPBC1198.07c	YES_glucose_0.1percent_32C_10days	1.008	0.971	0.108	-0.001	-0.053	0.464728	0.844189
SPBP26C9.02c	YES_glucose_0.1percent_32C_10days	1.044	1.08	-0.13	-0.026	0.025	0.383128	0.804984
SPBC29A3.03c	YES_glucose_0.1percent_32C_10days	0.765	0.729	-0.469	-0.377	-0.443	0.0438087	0.681601
SPBC31F10.07	YES_glucose_0.1percent_32C_10days	1.019	1.011	0.089	0.061	0.05	0.0955005	0.705125
SPBC1539.08	YES_glucose_0.1percent_32C_10days	0.936	0.924	0.438	0.358	0.342	0.394074	0.808007
SPAC926.06c	YES_glucose_0.1percent_32C_10days	0.931	0.92	0.08	0.006	-0.011	0.576359	0.870601
SPBC336.14c	YES_glucose_0.1percent_32C_10days	0.881	0.927	0.193	0.063	0.144	0.940637	0.985379
SPBC1711.14	YES_glucose_0.1percent_32C_10days	1.039	1.03	0.055	0	-0.012	0.909966	0.981486
SPBC15D4.07c	YES_glucose_0.1percent_32C_10days	1.002	0.994	0.029	0.002	-0.009	0.31522	0.794389
SPBC3F6.01c	YES_glucose_0.1percent_32C_10days	1.081	1.06	0.131	0.051	0.025	0.912709	0.981486
SPBC24C6.05	YES_glucose_0.1percent_32C_10days	1.046	1.008	0.404	0.274	0.224	NaN	NaN
SPBC21C3.14c	YES_glucose_0.1percent_32C_10days	1.012	0.996	0.085	0.022	-0.001	0.47553	0.847803
SPBC543.10	YES_glucose_0.1percent_32C_10days	0.995	0.979	-0.104	-0.069	-0.092	0.903432	0.980479
SPBC337.16	YES_glucose_0.1percent_32C_10days	0.92	0.947	-0.156	-0.036	0.009	0.407066	0.816793
SPBC354.10	YES_glucose_0.1percent_32C_10days	0.985	0.967	-0.094	-0.035	-0.061	0.833296	0.958942
SPBC685.06	YES_glucose_0.1percent_32C_10days	0.893	0.794	0.562	0.185	0.041	0.808552	0.949732
SPBC887.08	YES_glucose_0.1percent_32C_10days	0.956	0.951	-0.116	-0.108	-0.116	0.396505	0.808744
SPBP8B7.07c	YES_glucose_0.1percent_32C_10days	1.036	1.053	0.045	0.021	0.045	0.370798	0.801541
SPBC8D2.19	YES_glucose_0.1percent_32C_10days	1.058	1.058	0.055	0.053	0.054	0.00155226	0.578013
SPBPB7E8.02	YES_glucose_0.1percent_32C_10days	0.945	0.971	-0.241	-0.14	-0.099	0.0414629	0.681601
SPCC188.13c	YES_glucose_0.1percent_32C_10days	0.964	0.969	0.02	0.011	0.018	0.0309827	0.681601
SPBP4H10.13	YES_glucose_0.1percent_32C_10days	0.954	0.979	-0.129	-0.012	0.028	0.544725	0.866684
SPCC31H12.03c	YES_glucose_0.1percent_32C_10days	0.956	1.019	-0.37	-0.123	-0.021	0.477836	0.848844
SPCC737.03c	YES_glucose_0.1percent_32C_10days	0.951	0.976	-0.165	0.01	0.053	0.68001	0.905737
SPCC1183.02	YES_glucose_0.1percent_32C_10days	1.053	1.056	-0.048	-0.027	-0.022	0.282182	0.780928
SPAC1142.03c	YES_glucose_0.1percent_32C_10days	0.997	1.016	-0.155	-0.051	-0.022	0.322507	0.794389
SPAC10F6.13c	YES_glucose_0.1percent_32C_10days	0.833	0.843	-0.236	-0.131	-0.111	0.228184	0.765348
SPAC22H10.09	YES_glucose_0.1percent_32C_10days	0.7	0.761	-1.133	-0.509	-0.323	0.583625	0.872991
SPBC30B4.04c	YES_glucose_0.1percent_32C_10days	1.149	1.147	0.243	0.146	0.145	0.399931	0.808744
SPCC4G3.15c	YES_glucose_0.1percent_32C_10days	1.105	1.12	0.386	0.237	0.262	0.434309	0.831596
SPAC23H3.03c	YES_glucose_0.1percent_32C_10days	1.155	1.194	0.458	0.342	0.395	0.111291	0.722422
SPAC12G12.10	YES_glucose_0.1percent_32C_10days	1.044	1.043	0.047	0.001	0	0.331855	0.797006
SPAC26F1.10c	YES_glucose_0.1percent_32C_10days	0.923	0.935	0.162	0.085	0.106	0.590241	0.87615
SPAC2F3.02	YES_glucose_0.1percent_32C_10days	0.892	0.896	-0.225	-0.126	-0.118	0.0614427	0.681601
SPCC1442.16c	YES_glucose_0.1percent_32C_10days	1.073	1.095	-0.14	-0.067	-0.036	0.66256	0.89922
SPAC26H5.07c	YES_glucose_0.1percent_32C_10days	1.081	1.078	0.1	0.024	0.021	0.475162	0.847803
SPAC30D11.01c	YES_glucose_0.1percent_32C_10days	1.048	1.068	0.073	0.027	0.056	0.486374	0.850954
SPCC188.09c	YES_glucose_0.1percent_32C_10days	1.109	1.143	-0.084	0.009	0.053	0.183528	0.749529
SPAC589.07c	YES_glucose_0.1percent_32C_10days	1.001	1.027	-0.169	-0.091	-0.052	0.0960696	0.705125
SPAC343.18	YES_glucose_0.1percent_32C_10days	1.12	1.134	0.133	0.108	0.127	0.054628	0.681601
SPCC757.05c	YES_glucose_0.1percent_32C_10days	1.117	1.117	0.088	0.07	0.07	0.225181	0.763666
SPAC9G1.11c	YES_glucose_0.1percent_32C_10days	0.883	0.868	0.23	0.151	0.127	0.667188	0.90124
SPAC3G9.04	YES_glucose_0.1percent_32C_10days	0.833	0.833	-0.293	-0.135	-0.13	0.269853	0.779601
SPAC13G7.04c	YES_glucose_0.1percent_32C_10days	1.104	1.096	0.254	0.147	0.139	0.159568	0.739177
SPBC1683.08	YES_glucose_0.1percent_32C_10days	0.971	0.978	-0.199	-0.077	-0.063	0.690707	0.908302
SPAC4C5.01	YES_glucose_0.1percent_32C_10days	1.017	1.028	-0.155	-0.07	-0.053	0.639595	0.897169
SPAC17A5.04c	YES_glucose_0.1percent_32C_10days	1.034	1.05	-0.165	-0.112	-0.09	0.5275	0.857664
SPBC25B2.06c	YES_glucose_0.1percent_32C_10days	1.08	1.073	-0.185	-0.032	-0.035	0.605154	0.882767
SPAC1486.01	YES_glucose_0.1percent_32C_10days	0.947	0.852	-0.411	-0.086	-0.202	0.245236	0.768185
SPAC12B10.09	YES_glucose_0.1percent_32C_10days	0.817	0.839	-0.361	-0.233	-0.191	0.0249076	0.662964
SPAC1556.02c	YES_glucose_0.1percent_32C_10days	0.45	0.424	-1.238	-1.108	-1.186	0.0087963	0.598769
SPAC1786.04	YES_glucose_0.1percent_32C_10days	1.095	1.086	0.179	0.084	0.074	0.292113	0.785624
SPCC320.04c	YES_glucose_0.1percent_32C_10days	0.897	0.845	-0.378	-0.088	-0.149	0.758069	0.934659
SPAC14C4.05c	YES_glucose_0.1percent_32C_10days	1.164	1.161	0.176	0.088	0.087	0.117749	0.728628
SPAC20G8.10c	YES_glucose_0.1percent_32C_10days	1.061	1.088	0.143	0.075	0.113	0.258197	0.773913
SPAC22F3.07c	YES_glucose_0.1percent_32C_10days	0.864	0.853	-0.27	-0.179	-0.195	0.224153	0.763342
SPCC645.13	YES_glucose_0.1percent_32C_10days	1.245	1.226	0.176	0.125	0.103	0.0121305	0.655279
SPAC1687.06c	YES_glucose_0.1percent_32C_10days	1.186	1.177	0.201	0.134	0.124	0.088552	0.699234
SPAC25H1.07	YES_glucose_0.1percent_32C_10days	1.015	1.015	0.225	0.168	0.169	0.975422	0.993424
SPAC29A4.14c	YES_glucose_0.1percent_32C_10days	1.342	1.313	0.552	0.453	0.424	0.027681	0.681601
SPAC17A2.14	YES_glucose_0.1percent_32C_10days	1.114	1.143	0.097	0.054	0.092	0.294388	0.786121
SPAC4G9.06c	YES_glucose_0.1percent_32C_10days	0.93	0.919	-0.228	-0.204	-0.221	0.103658	0.719031
SPAC13G6.01c	YES_glucose_0.1percent_32C_10days	1.127	1.129	0.136	0.099	0.102	0.0190161	0.655279
SPAC1805.02c	YES_glucose_0.1percent_32C_10days	0.981	0.966	-0.174	-0.142	-0.164	0.209519	0.760257
SPAC7D4.03c	YES_glucose_0.1percent_32C_10days	0.985	0.986	-0.089	-0.082	-0.08	0.690405	0.908302
SPAC6F6.09	YES_glucose_0.1percent_32C_10days	1.141	1.129	0.277	0.247	0.232	0.167556	0.742625
SPAC18G6.02c	YES_glucose_0.1percent_32C_10days	1.011	1.021	0.384	0.346	0.361	0.0293411	0.681601
SPAC19A8.10	YES_glucose_0.1percent_32C_10days	1.12	1.091	0.234	0.113	0.077	0.539633	0.864488
SPBC11C11.11c	YES_glucose_0.1percent_32C_10days	1.044	1.055	0.141	0.063	0.081	0.755318	0.934659
SPAP27G11.16	YES_glucose_0.1percent_32C_10days	1.092	1.079	0.191	0.092	0.077	0.863983	0.968103
SPAC26H5.05	YES_glucose_0.1percent_32C_10days	0.938	0.938	0.226	0.163	0.163	0.408381	0.817974
SPAC1F7.11c	YES_glucose_0.1percent_32C_10days	1.154	1.172	0.305	0.15	0.179	0.456787	0.840638
SPBC16G5.07c	YES_glucose_0.1percent_32C_10days	1.025	1.025	0.055	0.028	0.028	0.210255	0.760257
SPAPB2B4.02	YES_glucose_0.1percent_32C_10days	0.686	0.686	-0.403	-0.386	-0.386	0.0658014	0.685683
SPAC3H1.12c	YES_glucose_0.1percent_32C_10days	0.94	0.945	-0.268	-0.145	-0.134	0.330784	0.797006
SPAC22F3.03c	YES_glucose_0.1percent_32C_10days	1.065	1.07	-0.09	-0.039	-0.031	0.429483	0.831295
SPBC23G7.08c	YES_glucose_0.1percent_32C_10days	0.678	0.678	-0.542	-0.514	-0.514	NaN	NaN
SPAC4H3.07c	YES_glucose_0.1percent_32C_10days	1.068	1.073	0.395	0.333	0.341	0.436227	0.832421
SPBC13G1.10c	YES_glucose_0.1percent_32C_10days	1.121	1.132	0.424	0.391	0.405	0.474803	0.847803
SPAC589.09	YES_glucose_0.1percent_32C_10days	1.04	1.055	0.052	0.032	0.052	0.29996	0.788544
SPAC30D11.09	YES_glucose_0.1percent_32C_10days	0.953	0.953	0.042	0.04	0.041	0.315415	0.794389
SPBC16A3.17c	YES_glucose_0.1percent_32C_10days	0.999	0.997	-0.084	-0.062	-0.065	0.221454	0.761558
SPAC6B12.02c	YES_glucose_0.1percent_32C_10days	0.861	0.979	0.388	0.151	0.37	0.701217	0.915123
SPAC3H8.02	YES_glucose_0.1percent_32C_10days	0.991	1.002	0.057	0.022	0.039	0.308503	0.791444
SPBC1703.06	YES_glucose_0.1percent_32C_10days	1.038	1.056	0.058	0.014	0.04	0.80475	0.949277
SPAC821.06	YES_glucose_0.1percent_32C_10days	0.919	0.925	-0.13	-0.057	-0.047	0.512319	0.854188
SPAC9G1.12	YES_glucose_0.1percent_32C_10days	1.056	1.058	0.303	0.236	0.239	0.175044	0.744526
SPBC1778.09	YES_glucose_0.1percent_32C_10days	0.986	0.983	-0.275	-0.211	-0.214	0.342099	0.798753
SPAC8C9.11	YES_glucose_0.1percent_32C_10days	0.95	0.971	0.066	0.02	0.053	0.176866	0.74704
SPBC16A3.03c	YES_glucose_0.1percent_32C_10days	0.882	0.897	-0.261	-0.137	-0.111	0.131273	0.728628
SPBC19C7.02	YES_glucose_0.1percent_32C_10days	0.92	0.897	-0.153	-0.09	-0.126	0.134918	0.728628
SPBC3B8.05	YES_glucose_0.1percent_32C_10days	0.964	0.994	-0.084	0.015	0.061	0.336345	0.798753
SPBC216.04c	YES_glucose_0.1percent_32C_10days	1.041	1.045	-0.079	-0.03	-0.024	0.293075	0.785624
SPAPB8E5.05	YES_glucose_0.1percent_32C_10days	1.009	0.994	-0.049	-0.015	-0.036	0.772523	0.937468
SPBC530.14c	YES_glucose_0.1percent_32C_10days	0.947	0.951	0.147	0.096	0.104	0.203145	0.759887
SPBC25B2.03	YES_glucose_0.1percent_32C_10days	1.052	1.038	-0.044	-0.01	-0.029	0.236256	0.768185
SPBC1198.12	YES_glucose_0.1percent_32C_10days	0.98	0.978	-0.077	-0.07	-0.072	0.339997	0.798753
SPCC1223.04c	YES_glucose_0.1percent_32C_10days	1.008	1.035	-0.126	-0.038	0.002	0.333689	0.797006
SPBC29A3.05	YES_glucose_0.1percent_32C_10days	0.951	0.967	0.074	0.024	0.048	0.649985	0.897169
SPBC20F10.05	YES_glucose_0.1percent_32C_10days	1.001	0.988	-0.088	-0.013	-0.029	0.569443	0.870601
SPAC869.06c	YES_glucose_0.1percent_32C_10days	1.066	1.045	0.117	-0.007	-0.032	0.38917	0.808007
SPCC622.14	YES_glucose_0.1percent_32C_10days	0.986	0.99	0.081	0.029	0.036	0.29992	0.788544
SPAC222.04c	YES_glucose_0.1percent_32C_10days	0.981	0.986	1.362	1.332	1.34	4.45513e-05	0.0501499
SPBC1861.06c	YES_glucose_0.1percent_32C_10days	0.992	1.008	-0.087	-0.038	-0.015	0.0948231	0.705125
SPAC26F1.12c	YES_glucose_0.1percent_32C_10days	1.011	1.001	0.054	0.011	-0.004	0.762242	0.93474
SPBC3B8.04c	YES_glucose_0.1percent_32C_10days	0.998	0.994	0.155	0.105	0.1	0.433371	0.831302
SPBC36.06c	YES_glucose_0.1percent_32C_10days	1.005	1.004	0.051	0.042	0.041	0.563916	0.870601
SPBC2F12.15c	YES_glucose_0.1percent_32C_10days	1.007	0.998	-0.045	-0.012	-0.025	0.784347	0.943283
SPBC1709.01	YES_glucose_0.1percent_32C_10days	0.997	1.023	-0.115	-0.011	0.029	0.836933	0.959321
SPBCPT2R1.01c	YES_glucose_0.1percent_32C_10days	1.05	1.054	-0.051	-0.037	-0.031	0.0372018	0.681601
SPCP31B10.04	YES_glucose_0.1percent_32C_10days	1.023	1.023	-0.124	-0.097	-0.097	0.817931	0.953133
SPBC19C7.05	YES_glucose_0.1percent_32C_10days	1.06	1.056	-0.128	-0.074	-0.078	0.320965	0.794389
SPCC162.12	YES_glucose_0.1percent_32C_10days	1.016	1.029	-0.039	0	0.018	0.643281	0.897169
SPBC800.02	YES_glucose_0.1percent_32C_10days	1.03	1.022	0.067	0.036	0.025	0.0755787	0.693022
SPBC365.11	YES_glucose_0.1percent_32C_10days	1.021	1.031	-0.027	0.006	0.02	0.14722	0.738482
SPCC737.05	YES_glucose_0.1percent_32C_10days	1.041	1.023	0.125	0.044	0.02	0.62057	0.892454
SPAC3G9.03	YES_glucose_0.1percent_32C_10days	0.804	0.784	0.476	0.34	0.307	0.212523	0.760257
SPAC8F11.09c	YES_glucose_0.1percent_32C_10days	1.025	1.016	-0.033	-0.016	-0.028	0.395424	0.808744
SPAC17G8.10c	YES_glucose_0.1percent_32C_10days	1.028	1.022	-0.095	-0.053	-0.061	0.372171	0.801541
SPAC1805.01c	YES_glucose_0.1percent_32C_10days	0.932	0.915	-0.119	-0.068	-0.094	0.626788	0.895256
SPAPB1A10.09	YES_glucose_0.1percent_32C_10days	0.848	0.848	-0.263	-0.204	-0.204	0.00249343	0.578013
SPAC23G3.10c	YES_glucose_0.1percent_32C_10days	1.128	1.109	0.347	0.289	0.265	0.460061	0.843112
SPBC16A3.13	YES_glucose_0.1percent_32C_10days	1.018	1	-0.166	-0.104	-0.129	0.757966	0.934659
SPAC7D4.06c	YES_glucose_0.1percent_32C_10days	0.933	0.933	-0.098	-0.072	-0.072	NaN	NaN
SPBC3E7.07c	YES_glucose_0.1percent_32C_10days	1.067	1.079	0.13	0.039	0.057	0.735983	0.927749
SPAC637.09	YES_glucose_0.1percent_32C_10days	0.725	0.767	-0.296	-0.016	0.08	0.970644	0.99119
SPCC1235.08c	YES_glucose_0.1percent_32C_10days	0.979	0.963	-0.072	-0.042	-0.065	0.441688	0.833081
SPAC19G12.11	YES_glucose_0.1percent_32C_10days	0.912	0.915	-0.183	-0.068	-0.061	0.1015	0.719031
SPBC13E7.04	YES_glucose_0.1percent_32C_10days	0.887	0.908	-0.269	-0.175	-0.139	0.0493619	0.681601
SPCC777.15	YES_glucose_0.1percent_32C_10days	1.005	0.994	-0.075	-0.051	-0.066	0.736211	0.927749
SPAC521.05	YES_glucose_0.1percent_32C_10days	1.032	1.042	-0.085	-0.056	-0.043	0.171168	0.742625
SPBC365.14c	YES_glucose_0.1percent_32C_10days	0.976	1.012	-0.271	-0.138	-0.082	0.283759	0.780928
SPAC25B8.09	YES_glucose_0.1percent_32C_10days	1.015	1.021	-0.104	-0.076	-0.068	0.894289	0.978618
SPAC57A10.07	YES_glucose_0.1percent_32C_10days	1.129	1.137	-0.077	-0.027	-0.016	0.169328	0.742625
SPAC6G9.03c	YES_glucose_0.1percent_32C_10days	0.993	0.987	-0.061	-0.034	-0.043	0.374038	0.801541
SPAC1F3.03	YES_glucose_0.1percent_32C_10days	0.933	0.937	-0.167	-0.103	-0.096	0.0160648	0.655279
SPAC630.07c	YES_glucose_0.1percent_32C_10days	1.016	1.009	0.051	0.009	0	0.444802	0.834034
SPBC18A7.01	YES_glucose_0.1percent_32C_10days	1.035	1.022	0.072	0.022	0.004	0.392924	0.808007
SPCC126.10	YES_glucose_0.1percent_32C_10days	1.002	0.998	-0.095	-0.038	-0.043	0.620926	0.892454
SPAC6F12.04	YES_glucose_0.1percent_32C_10days	1.045	1.049	0.019	0.008	0.014	0.306955	0.791444
SPAC24H6.13	YES_glucose_0.1percent_32C_10days	1.172	1.151	0.273	0.196	0.171	0.299757	0.788544
SPBC25B2.07c	YES_glucose_0.1percent_32C_10days	1.117	1.109	0.13	0.079	0.069	0.0990605	0.714416
SPCC1020.11c	YES_glucose_0.1percent_32C_10days	0.912	0.912	-0.206	-0.11	-0.11	0.728404	0.926412
SPAC6B12.09	YES_glucose_0.1percent_32C_10days	1.041	1.041	0.025	0.004	0.004	0.332558	0.797006
SPBC1861.09	YES_glucose_0.1percent_32C_10days	1.036	1.036	-0.004	-0.003	-0.003	0.704817	0.918629
SPBC3B9.15c	YES_glucose_0.1percent_32C_10days	1.125	1.095	0.166	0.085	0.046	0.0911677	0.699234
SPCC777.02	YES_glucose_0.1percent_32C_10days	1.094	1.14	0.098	0.033	0.095	0.980148	0.99356
SPBC1709.04c	YES_glucose_0.1percent_32C_10days	1.014	1.004	-0.081	-0.052	-0.066	0.0879682	0.699234
SPAC823.11	YES_glucose_0.1percent_32C_10days	0.961	0.959	0.286	0.22	0.217	0.0212012	0.662964
SPBP4G3.03	YES_glucose_0.1percent_32C_10days	1.054	1.052	0.152	0.088	0.086	0.292658	0.785624
SPAC664.13	YES_glucose_0.1percent_32C_10days	1.11	1.106	0.11	0.084	0.079	0.0250842	0.662964
SPBC342.01c	YES_glucose_0.1percent_32C_10days	0.797	0.821	-0.278	-0.167	-0.122	0.337507	0.798753
SPAC23C4.03	YES_glucose_0.1percent_32C_10days	1.07	1.067	0.075	0.042	0.038	0.274182	0.780928
SPCC4F11.04c	YES_glucose_0.1percent_32C_10days	1.05	1.078	0.103	0.04	0.08	0.360855	0.799256
SPBC83.02c	YES_glucose_0.1percent_32C_10days	0.964	0.988	0.428	0.387	0.423	0.0139749	0.655279
SPCC1281.07c	YES_glucose_0.1percent_32C_10days	1.094	1.094	0.025	0.017	0.017	0.708514	0.920897
SPCC4E9.01c	YES_glucose_0.1percent_32C_10days	1.1	1.112	0.064	0.041	0.057	0.0879847	0.699234
SPCC757.09c	YES_glucose_0.1percent_32C_10days	0.705	0.71	-0.251	-0.178	-0.167	0.0322654	0.681601
SPCC794.07	YES_glucose_0.1percent_32C_10days	0.956	0.994	-0.231	-0.111	-0.052	0.134426	0.728628
SPCC70.10	YES_glucose_0.1percent_32C_10days	1.036	1.06	-0.099	-0.014	0.02	0.723202	0.923027
SPAC18G6.10	YES_glucose_0.1percent_32C_10days	1.013	1.035	-0.116	0.009	0.043	0.338728	0.798753
SPAC13G6.08	YES_glucose_0.1percent_32C_10days	0.994	0.984	-0.049	-0.027	-0.042	0.546908	0.867501
SPAC25B8.07c	YES_glucose_0.1percent_32C_10days	1.013	1.01	-0.058	-0.031	-0.035	0.808964	0.949732
SPAC144.04c	YES_glucose_0.1percent_32C_10days	0.874	0.847	-0.416	-0.143	-0.169	0.560873	0.870601
SPAC21E11.05c	YES_glucose_0.1percent_32C_10days	1.021	1.014	0.052	0.006	-0.004	0.216919	0.760257
SPAC22A12.11	YES_glucose_0.1percent_32C_10days	1.003	1	0.045	0.034	0.03	0.0758643	0.693022
SPAC4F10.11	YES_glucose_0.1percent_32C_10days	1.009	0.998	0.219	0.146	0.132	0.125947	0.728628
SPAC3H8.08c	YES_glucose_0.1percent_32C_10days	1.105	1.095	0.119	0.067	0.054	0.0872113	0.699234
SPAC3G9.07c	YES_glucose_0.1percent_32C_10days	0.708	0.722	-0.494	-0.396	-0.367	0.0588524	0.681601
SPBC557.05	YES_glucose_0.1percent_32C_10days	1.059	1.059	0.116	0.063	0.064	0.174094	0.744526
SPAC823.05c	YES_glucose_0.1percent_32C_10days	1.007	1.01	0.039	0.027	0.032	0.203013	0.759887
SPAC1F8.06	YES_glucose_0.1percent_32C_10days	0.939	0.924	-0.117	-0.059	-0.08	0.32221	0.794389
SPAC13D6.01	YES_glucose_0.1percent_32C_10days	1.007	1.009	-0.02	-0.007	-0.005	0.190988	0.755607
SPAC26A3.11	YES_glucose_0.1percent_32C_10days	1.007	1.007	-0.012	-0.011	-0.011	0.671774	0.901638
SPBC31F10.15c	YES_glucose_0.1percent_32C_10days	0.954	0.954	-0.121	-0.11	-0.11	0.0205774	0.662964
SPAC22A12.03c	YES_glucose_0.1percent_32C_10days	1.014	1.028	-0.072	-0.018	0.001	0.318791	0.794389
SPBC1289.06c	YES_glucose_0.1percent_32C_10days	0.96	0.994	-0.271	-0.11	-0.056	0.213883	0.760257
SPCC645.07	YES_glucose_0.1percent_32C_10days	1.011	1.007	-0.035	-0.023	-0.029	0.33164	0.797006
SPAC977.14c	YES_glucose_0.1percent_32C_10days	1.012	1.023	0.061	0.039	0.054	0.930858	0.985379
SPAP7G5.05	YES_glucose_0.1percent_32C_10days	0.938	0.968	0.251	0.179	0.227	0.733079	0.926775
SPBC83.16c	YES_glucose_0.1percent_32C_10days	1.019	1.02	0.073	0.022	0.024	0.441018	0.833081
SPCC777.09c	YES_glucose_0.1percent_32C_10days	1.094	1.065	0.252	0.143	0.107	0.154153	0.738482
SPAC13C5.04	YES_glucose_0.1percent_32C_10days	0.985	0.942	0.16	0.03	-0.031	0.48617	0.850954
SPAC869.07c	YES_glucose_0.1percent_32C_10days	1.025	1.01	-0.064	-0.024	-0.044	0.710513	0.920996
SPAC3H1.14	YES_glucose_0.1percent_32C_10days	0.951	0.967	-0.085	-0.034	-0.01	0.397086	0.808744
SPBC216.05	YES_glucose_0.1percent_32C_10days	0.929	0.949	-0.123	-0.016	0.018	0.127286	0.728628
SPBC32F12.12c	YES_glucose_0.1percent_32C_10days	1.01	0.998	-0.042	-0.024	-0.041	0.249949	0.768185
SPCC1620.13	YES_glucose_0.1percent_32C_10days	1.029	1.032	0.078	0.038	0.043	0.0291257	0.681601
SPBP4H10.10	YES_glucose_0.1percent_32C_10days	0.826	0.814	-0.362	-0.318	-0.338	0.00704902	0.598769
SPAC3G6.01	YES_glucose_0.1percent_32C_10days	1.116	1.085	0.249	0.159	0.12	0.0440833	0.681601
SPCC757.03c	YES_glucose_0.1percent_32C_10days	0.93	0.895	0.105	-0.009	-0.062	0.670854	0.901638
SPBC29A10.16c	YES_glucose_0.1percent_32C_10days	0.962	0.962	0.236	0.124	0.124	0.327939	0.797006
SPAP32A8.02	YES_glucose_0.1percent_32C_10days	0.887	1.012	-0.866	-0.306	-0.066	0.392484	0.808007
SPCP1E11.03	YES_glucose_0.1percent_32C_10days	0.974	0.98	-0.257	-0.149	-0.137	0.108038	0.722422
SPAC31A2.14	YES_glucose_0.1percent_32C_10days	1.157	1.165	0.117	0.089	0.099	0.184062	0.749529
SPBC19C2.04c	YES_glucose_0.1percent_32C_10days	1.006	0.995	0.082	0.012	-0.002	0.29861	0.788544
SPBC1711.04	YES_glucose_0.1percent_32C_10days	0.819	0.775	-0.45	-0.208	-0.27	0.660877	0.899097
SPBC365.16	YES_glucose_0.1percent_32C_10days	0.784	0.798	-0.421	-0.345	-0.318	0.189668	0.755607
SPBC215.14c	YES_glucose_0.1percent_32C_10days	1.009	1.019	-0.067	-0.005	0.01	0.152828	0.738482
SPBP23A10.14c	YES_glucose_0.1percent_32C_10days	0.899	0.981	-0.571	-0.154	0.001	0.414874	0.821315
SPAC7D4.13c	YES_glucose_0.1percent_32C_10days	0.98	1.011	0.186	0.104	0.152	0.359803	0.799256
SPBC4F6.08c	YES_glucose_0.1percent_32C_10days	0.651	0.612	-0.761	-0.625	-0.706	0.190204	0.755607
SPCC1840.09	YES_glucose_0.1percent_32C_10days	0.925	0.919	-0.095	-0.041	-0.049	0.0902958	0.699234
SPBC4B4.03	YES_glucose_0.1percent_32C_10days	0.71	0.696	-0.471	-0.338	-0.361	0.0528991	0.681601
SPCC777.08c	YES_glucose_0.1percent_32C_10days	1.175	1.185	0.395	0.309	0.324	0.126452	0.728628
SPBC16H5.12c	YES_glucose_0.1percent_32C_10days	1.207	1.195	0.164	0.086	0.073	0.0558376	0.681601
SPAC1834.10c	YES_glucose_0.1percent_32C_10days	1.091	1.095	0.108	0.049	0.056	0.118404	0.728628
SPBC25B2.02c	YES_glucose_0.1percent_32C_10days	1.055	1.028	0.133	0.01	-0.025	0.743112	0.932203
SPBC1198.03c	YES_glucose_0.1percent_32C_10days	0.949	0.942	0.055	0.003	-0.008	0.203356	0.759887
SPAC24C9.12c	YES_glucose_0.1percent_32C_10days	0.943	0.942	-0.099	-0.072	-0.073	0.947862	0.985523
SPAC6G9.14	YES_glucose_0.1percent_32C_10days	0.966	0.961	-0.076	-0.02	-0.026	0.0995008	0.714924
SPBC16D10.11c	YES_glucose_0.1percent_32C_10days	1.047	1.012	0.187	0.079	0.033	0.987332	0.994696
SPAC25B8.13c	YES_glucose_0.1percent_32C_10days	1.096	1.084	0.066	0.015	0	0.874807	0.971145
SPAC869.01	YES_glucose_0.1percent_32C_10days	1.089	1.097	-0.094	-0.023	-0.011	0.577212	0.870601
SPBC405.06	YES_glucose_0.1percent_32C_10days	1.1	1.064	0.224	0.059	0.016	0.628427	0.89582
SPAC57A10.10c	YES_glucose_0.1percent_32C_10days	1.175	1.181	0.3	0.189	0.199	0.360666	0.799256
SPBC2G2.13c	YES_glucose_0.1percent_32C_10days	0.892	0.904	0.607	0.535	0.556	0.349569	0.798753
SPCC1281.04	YES_glucose_0.1percent_32C_10days	1.06	1.072	0.052	0.031	0.047	0.354699	0.798753
SPBC3D6.08c	YES_glucose_0.1percent_32C_10days	0.802	0.794	-0.395	-0.306	-0.319	0.0992186	0.714416
SPCC794.10	YES_glucose_0.1percent_32C_10days	1.043	1.024	0.117	0.059	0.032	0.422736	0.826625
SPAC17C9.08	YES_glucose_0.1percent_32C_10days	0.993	0.992	-0.038	-0.015	-0.017	0.660895	0.899097
SPAC3F10.04	YES_glucose_0.1percent_32C_10days	0.877	0.873	-0.228	-0.196	-0.203	0.0122386	0.655279
SPAC23H4.14	YES_glucose_0.1percent_32C_10days	1.079	1.077	0.104	0.025	0.024	0.303976	0.788544
SPAC7D4.05	YES_glucose_0.1percent_32C_10days	1.081	1.061	0.114	0.056	0.03	0.63069	0.896397
SPAC19G12.12	YES_glucose_0.1percent_32C_10days	1.057	1.021	0.118	0.014	-0.033	0.308063	0.791444
SPBC1347.07	YES_glucose_0.1percent_32C_10days	1.057	1.053	0.051	0.029	0.024	0.559617	0.870601
SPBC1921.04c	YES_glucose_0.1percent_32C_10days	0.979	0.982	-0.135	-0.069	-0.064	0.347231	0.798753
SPBC337.13c	YES_glucose_0.1percent_32C_10days	1.061	1.103	0.22	0.082	0.145	0.379592	0.803184
SPAC11E3.11c	YES_glucose_0.1percent_32C_10days	1.026	1.028	0.25	0.221	0.224	0.212609	0.760257
SPCC1393.10	YES_glucose_0.1percent_32C_10days	0.836	0.779	-0.436	-0.199	-0.281	0.441009	0.833081
SPAC27D7.05c	YES_glucose_0.1percent_32C_10days	1.017	1.038	-0.091	0.007	0.038	0.534493	0.862208
SPAC27D7.06	YES_glucose_0.1percent_32C_10days	0.882	0.845	-0.318	-0.257	-0.317	0.441812	0.833081
SPBC25H2.03	YES_glucose_0.1percent_32C_10days	1.055	1.063	0.06	0.032	0.043	0.811498	0.950568
SPCC1919.07	YES_glucose_0.1percent_32C_10days	0.984	1.019	-0.33	-0.088	-0.027	0.559528	0.870601
SPAC732.02c	YES_glucose_0.1percent_32C_10days	1.318	1.327	0.387	0.311	0.322	0.0295363	0.681601
SPAC959.07	YES_glucose_0.1percent_32C_10days	1.002	1.006	0.292	0.283	0.288	0.187035	0.752823
SPBC18E5.08	YES_glucose_0.1percent_32C_10days	0.938	0.937	-0.293	-0.11	-0.104	0.351653	0.798753
SPBC1734.09	YES_glucose_0.1percent_32C_10days	1.011	1.021	-0.088	-0.049	-0.035	0.71822	0.921257
SPBP4H10.09	YES_glucose_0.1percent_32C_10days	0.997	1.005	0.166	0.094	0.106	0.268012	0.776999
SPAC959.08	YES_glucose_0.1percent_32C_10days	0.876	0.898	0.173	0.104	0.141	0.384596	0.806351
SPBC354.12	YES_glucose_0.1percent_32C_10days	1.044	1.002	-0.107	-0.038	-0.094	0.655962	0.897926
SPCC338.06c	YES_glucose_0.1percent_32C_10days	1.034	1.002	-0.082	-0.034	-0.078	0.638709	0.897169
SPCC548.05c	YES_glucose_0.1percent_32C_10days	1.045	1.054	-0.065	0.004	0.017	0.494143	0.852447
SPCC126.03	YES_glucose_0.1percent_32C_10days	1.052	1.023	0.162	0.068	0.029	0.210138	0.760257
SPCC1450.03	YES_glucose_0.1percent_32C_10days	0.89	0.852	-0.198	-0.129	-0.19	0.332561	0.797006
SPAC12B10.05	YES_glucose_0.1percent_32C_10days	1.063	1.048	0.094	0.003	-0.016	0.411807	0.819006
SPCC757.11c	YES_glucose_0.1percent_32C_10days	1.053	1.042	0.045	0.014	-0.001	0.60413	0.882036
SPAC11D3.04c	YES_glucose_0.1percent_32C_10days	1.099	1.137	0.125	0.042	0.094	0.340536	0.798753
SPCC737.06c	YES_glucose_0.1percent_32C_10days	1.146	1.116	0.284	0.17	0.133	0.721963	0.923027
SPBC1683.09c	YES_glucose_0.1percent_32C_10days	0.806	0.846	-0.572	-0.217	-0.124	0.262834	0.774836
SPAC26A3.02	YES_glucose_0.1percent_32C_10days	1.03	1.033	-0.03	-0.009	-0.005	0.967177	0.990941
SPAC14C4.06c	YES_glucose_0.1percent_32C_10days	0.987	0.978	0.326	0.29	0.277	0.590849	0.876669
SPAC1399.03	YES_glucose_0.1percent_32C_10days	1.12	1.115	0.154	0.073	0.069	0.24159	0.768185
SPAC22F8.02c	YES_glucose_0.1percent_32C_10days	0.778	0.752	0.16	0.017	-0.027	0.0862691	0.699234
SPBC119.14	YES_glucose_0.1percent_32C_10days	1.147	1.129	0.16	0.062	0.041	0.201988	0.759887
SPAC4F10.17	YES_glucose_0.1percent_32C_10days	1.078	1.071	0.058	0.001	-0.008	0.310576	0.792756
SPCC550.07	YES_glucose_0.1percent_32C_10days	1.114	1.104	0.105	0.052	0.04	0.487316	0.850954
SPAC4A8.09c	YES_glucose_0.1percent_32C_10days	0.952	0.951	0.049	0.004	0.002	0.483244	0.850954
SPCC18B5.06	YES_glucose_0.1percent_32C_10days	0.976	1	0.166	0.117	0.153	0.051794	0.681601
SPAC922.04	YES_glucose_0.1percent_32C_10days	1.072	1.078	0.065	0.018	0.026	0.370456	0.801541
SPAC644.07	YES_glucose_0.1percent_32C_10days	0.924	0.89	-0.193	-0.111	-0.162	0.433129	0.831302
SPAC13D6.02c	YES_glucose_0.1percent_32C_10days	1.133	1.114	0.295	0.239	0.216	0.315083	0.794389
SPAC1952.03	YES_glucose_0.1percent_32C_10days	0.996	0.962	0.309	0.166	0.12	0.56327	0.870601
SPBC36B7.06c	YES_glucose_0.1percent_32C_10days	1.04	1.034	0.106	0.064	0.055	0.484642	0.850954
SPAC22E12.05c	YES_glucose_0.1percent_32C_10days	1.052	1.045	0.141	0.071	0.062	0.583717	0.872991
SPBC337.08c	YES_glucose_0.1percent_32C_10days	0.845	0.865	-0.315	-0.24	-0.204	0.0108582	0.643299
SPAC12G12.13c	YES_glucose_0.1percent_32C_10days	0.938	0.936	-0.146	-0.094	-0.097	0.183795	0.749529
SPAPB1A10.10c	YES_glucose_0.1percent_32C_10days	0.98	0.999	-0.073	-0.001	0.027	0.58077	0.872071
SPAC9.13c	YES_glucose_0.1percent_32C_10days	0.922	0.934	-0.119	-0.066	-0.048	0.206121	0.760257
SPAPB8E5.10	YES_glucose_0.1percent_32C_10days	1.017	1.025	-0.058	-0.014	-0.002	0.549812	0.867991
SPBC902.05c	YES_glucose_0.1percent_32C_10days	1.021	1.004	0.081	0.023	0	0.693927	0.910116
SPAC24H6.11c	YES_glucose_0.1percent_32C_10days	1.018	1.002	0.078	0.003	-0.018	0.908731	0.981383
SPCC965.09	YES_glucose_0.1percent_32C_10days	1.075	1.119	0.132	0.057	0.118	0.245195	0.768185
SPAC13D6.04c	YES_glucose_0.1percent_32C_10days	1.041	1.034	0.166	0.066	0.058	0.228222	0.765348
SPAPB24D3.09c	YES_glucose_0.1percent_32C_10days	1.055	1.05	0.071	0.038	0.032	0.645627	0.897169
SPAC8C9.09c	YES_glucose_0.1percent_32C_10days	1.032	1.024	0.069	0.019	0.008	0.0702588	0.693022
SPAC3H8.04	YES_glucose_0.1percent_32C_10days	1.027	1.037	0.052	0.012	0.026	0.119629	0.728628
SPBC24C6.11	YES_glucose_0.1percent_32C_10days	0.691	0.621	-0.41	-0.184	-0.314	0.609237	0.885662
SPCC1235.02	YES_glucose_0.1percent_32C_10days	1.025	1.008	0.092	0.004	-0.019	0.961806	0.990399
SPCC1739.07	YES_glucose_0.1percent_32C_10days	0.253	0.332	-1.873	-0.635	-0.021	NaN	NaN
SPCC1223.01	YES_glucose_0.1percent_32C_10days	1.042	1.054	0.074	0.033	0.05	0.374073	0.801541
SPAC513.04	YES_glucose_0.1percent_32C_10days	0.998	0.976	0.09	0.006	-0.025	0.746806	0.93412
SPCC965.12	YES_glucose_0.1percent_32C_10days	0.975	0.956	-0.074	-0.033	-0.061	0.431747	0.831302
SPBC543.08	YES_glucose_0.1percent_32C_10days	1.024	1.035	-0.06	-0.029	-0.013	0.514233	0.854188
SPBC2G2.03c	YES_glucose_0.1percent_32C_10days	0.768	0.771	-0.439	-0.273	-0.262	0.0629398	0.683331
SPAPB24D3.02c	YES_glucose_0.1percent_32C_10days	0.999	1.009	0.054	0.022	0.037	0.238377	0.768185
SPAC7D4.08	YES_glucose_0.1percent_32C_10days	1.117	1.104	0.101	0.042	0.026	0.347702	0.798753
SPCC188.12	YES_glucose_0.1percent_32C_10days	1.047	1.06	0.081	0.036	0.055	0.368732	0.801541
SPBC83.01	YES_glucose_0.1percent_32C_10days	1.011	1.019	0.021	0.007	0.019	0.689384	0.907622
SPBC3B9.13c	YES_glucose_0.1percent_32C_10days	0.874	0.87	0.252	0.209	0.203	0.0526213	0.681601
SPBC25H2.10c	YES_glucose_0.1percent_32C_10days	1.011	1.005	0.11	0.089	0.08	0.160898	0.742358
SPBC23G7.14	YES_glucose_0.1percent_32C_10days	0.73	0.63	-0.93	-0.525	-0.678	0.238249	0.768185
SPBP4H10.18c	YES_glucose_0.1percent_32C_10days	1.016	1.011	-0.087	-0.043	-0.049	0.778488	0.940043
SPCC790.03	YES_glucose_0.1percent_32C_10days	0.87	0.87	0.635	0.335	0.335	NaN	NaN
SPBC8D2.16c	YES_glucose_0.1percent_32C_10days	1.031	1.018	0.088	0.003	-0.015	0.733219	0.926775
SPCC24B10.10c	YES_glucose_0.1percent_32C_10days	0.889	0.891	-0.262	-0.175	-0.17	0.0661431	0.685683
SPAC12B10.13	YES_glucose_0.1percent_32C_10days	0.925	0.954	-0.197	-0.081	-0.034	0.969399	0.990941
SPBC776.11	YES_glucose_0.1percent_32C_10days	0.959	0.992	0.271	0.2	0.251	0.168198	0.742625
SPCC965.08c	YES_glucose_0.1percent_32C_10days	1.038	1.024	0.091	0.018	-0.001	0.495024	0.852471
SPAC19B12.09	YES_glucose_0.1percent_32C_10days	0.959	0.956	0.015	0.006	0.002	0.643169	0.897169
SPBC21C3.19	YES_glucose_0.1percent_32C_10days	0.989	0.994	-0.082	-0.034	-0.027	0.314213	0.794389
SPAC186.08c	YES_glucose_0.1percent_32C_10days	1.015	1.025	-0.086	-0.012	0.004	0.895704	0.979214
SPAC23A1.06c	YES_glucose_0.1percent_32C_10days	1.054	1.064	0.065	0.04	0.054	0.170108	0.742625
SPBC336.13c	YES_glucose_0.1percent_32C_10days	0.868	0.873	-0.177	-0.105	-0.096	0.80208	0.949062
SPAC26A3.07c	YES_glucose_0.1percent_32C_10days	0.815	0.852	-0.213	-0.067	0	0.957055	0.988001
SPAC57A7.13	YES_glucose_0.1percent_32C_10days	1.058	1.052	0.103	0.083	0.074	0.0135439	0.655279
SPBC1709.16c	YES_glucose_0.1percent_32C_10days	1.051	1.066	0.074	0.041	0.063	0.715698	0.920996
SPCC645.08c	YES_glucose_0.1percent_32C_10days	1.1	1.071	0.176	0.065	0.028	0.594127	0.87908
SPAC890.02c	YES_glucose_0.1percent_32C_10days	0.969	1	-0.106	-0.006	0.041	0.385268	0.80655
SPBC409.16c	YES_glucose_0.1percent_32C_10days	1.091	1.085	0.115	0.04	0.033	0.0888837	0.699234
SPCC550.12	YES_glucose_0.1percent_32C_10days	1.022	1.011	0.157	0.104	0.089	0.824211	0.955168
SPCC1393.08	YES_glucose_0.1percent_32C_10days	0.953	0.948	-0.212	-0.199	-0.206	0.0710636	0.693022
SPAC56F8.16	YES_glucose_0.1percent_32C_10days	1.062	1.07	-0.067	-0.019	-0.008	0.272574	0.780928
SPBC530.13	YES_glucose_0.1percent_32C_10days	0.91	0.911	-0.306	-0.201	-0.198	0.686667	0.907266
SPAC10F6.08c	YES_glucose_0.1percent_32C_10days	1.18	1.197	0.268	0.2	0.223	0.0484452	0.681601
SPBC887.01	YES_glucose_0.1percent_32C_10days	1.05	1.067	-0.082	-0.01	0.015	0.435502	0.832104
SPCC24B10.09	YES_glucose_0.1percent_32C_10days	0.918	0.916	0.084	0.045	0.042	0.766615	0.935102
SPAC29B12.06c	YES_glucose_0.1percent_32C_10days	1.061	1.11	-0.253	-0.085	-0.016	0.349078	0.798753
SPBC1921.01c	YES_glucose_0.1percent_32C_10days	0.993	0.983	0.176	0.114	0.1	0.499701	0.852537
SPAP8A3.07c	YES_glucose_0.1percent_32C_10days	0.985	0.975	0.469	0.418	0.404	NaN	NaN
SPBC16D10.02	YES_glucose_0.1percent_32C_10days	1.064	1.075	0.111	0.073	0.089	0.918497	0.982815
SPBC1921.06c	YES_glucose_0.1percent_32C_10days	0.766	0.771	0.036	0.011	0.021	0.182653	0.749529
SPCC364.04c	YES_glucose_0.1percent_32C_10days	1.045	1.043	0.046	0.014	0.011	0.606168	0.883482
SPAC12G12.03	YES_glucose_0.1percent_32C_10days	1.054	1.018	0.297	0.199	0.151	0.248836	0.768185
SPCC1442.13c	YES_glucose_0.1percent_32C_10days	1.045	1.047	-0.054	-0.02	-0.016	0.311494	0.793899
SPBC17D11.01	YES_glucose_0.1percent_32C_10days	1.035	1.041	-0.089	-0.071	-0.062	0.186194	0.751756
SPAC27E2.02	YES_glucose_0.1percent_32C_10days	1.044	1.07	0.088	0.031	0.069	0.963384	0.990941
SPBC29A10.03c	YES_glucose_0.1percent_32C_10days	0.989	0.993	-0.038	-0.022	-0.016	0.379503	0.803184
SPAC15A10.08	YES_glucose_0.1percent_32C_10days	0.969	0.968	-0.025	-0.01	-0.011	0.62061	0.892454
SPAC806.04c	YES_glucose_0.1percent_32C_10days	1.041	1.043	0.072	0.014	0.018	0.277249	0.780928
SPBC660.06	YES_glucose_0.1percent_32C_10days	1.065	1.073	0.053	0.034	0.045	0.78551	0.943551
SPAC14C4.13	YES_glucose_0.1percent_32C_10days	0.988	0.985	-0.023	-0.019	-0.023	0.310417	0.792756
SPBC20F10.02c	YES_glucose_0.1percent_32C_10days	1.016	1.029	-0.069	-0.032	-0.013	0.213474	0.760257
SPBC13G1.02	YES_glucose_0.1percent_32C_10days	1.048	1.055	0.074	0.056	0.066	0.221519	0.761558
SPCC1020.08	YES_glucose_0.1percent_32C_10days	1.003	0.997	0.022	0.003	-0.006	0.34375	0.798753
SPBC16G5.06	YES_glucose_0.1percent_32C_10days	0.953	0.931	-0.122	-0.084	-0.117	0.67708	0.903755
SPBC359.04c	YES_glucose_0.1percent_32C_10days	1.014	1.011	-0.054	-0.036	-0.041	0.455785	0.840289
SPAC23C4.06c	YES_glucose_0.1percent_32C_10days	1.064	1.087	0.093	0.032	0.064	0.723575	0.923027
SPCC553.04	YES_glucose_0.1percent_32C_10days	0.722	0.737	-0.271	-0.17	-0.137	0.861219	0.967189
SPAC144.03	YES_glucose_0.1percent_32C_10days	0.966	0.942	0.07	-0.004	-0.04	0.504216	0.854188
SPCC1620.04c	YES_glucose_0.1percent_32C_10days	0.997	0.995	-0.101	-0.08	-0.083	0.151987	0.738482
SPBC25H2.16c	YES_glucose_0.1percent_32C_10days	1.017	1.008	0.068	0.021	0.009	0.873864	0.970837
SPCC777.12c	YES_glucose_0.1percent_32C_10days	0.987	0.993	-0.074	-0.035	-0.027	0.202864	0.759887
SPAC144.14	YES_glucose_0.1percent_32C_10days	1.078	1.071	0.06	0.039	0.03	0.521191	0.854284
SPCC777.06c	YES_glucose_0.1percent_32C_10days	1.065	1.085	0.096	0.058	0.085	0.95864	0.988497
SPBC1773.14	YES_glucose_0.1percent_32C_10days	1.047	1.013	0.137	0.04	-0.006	0.490932	0.851263
SPAC15A10.07	YES_glucose_0.1percent_32C_10days	1.008	1.002	-0.025	-0.015	-0.024	0.822993	0.955068
SPAC30D11.06c	YES_glucose_0.1percent_32C_10days	1.075	1.077	0.062	0.009	0.012	0.76163	0.934659
SPAC17A5.02c	YES_glucose_0.1percent_32C_10days	0.806	0.836	-0.366	-0.088	-0.021	0.273634	0.780928
SPAC30D11.05	YES_glucose_0.1percent_32C_10days	1.008	0.988	0.166	0.082	0.054	0.172273	0.742625
SPAC22F8.05	YES_glucose_0.1percent_32C_10days	0.992	1.003	-0.043	-0.009	0.007	0.332368	0.797006
SPBC1685.06	YES_glucose_0.1percent_32C_10days	0.966	0.968	-0.152	-0.049	-0.044	0.817961	0.953133
SPAC4F8.01	YES_glucose_0.1percent_32C_10days	0.8	0.783	-0.325	-0.227	-0.255	0.125248	0.728628
SPAC29B12.02c	YES_glucose_0.1percent_32C_10days	0.992	0.98	-0.121	-0.059	-0.076	0.17182	0.742625
SPAC12B10.04	YES_glucose_0.1percent_32C_10days	1.029	1.042	-0.074	-0.033	-0.015	0.798946	0.947346
SPAC977.05c	YES_glucose_0.1percent_32C_10days	0.99	1.004	-0.161	-0.088	-0.068	0.232176	0.768185
SPAC922.06	YES_glucose_0.1percent_32C_10days	1.02	1.013	0.02	-0.001	-0.01	0.632382	0.896915
SPAC14C4.10c	YES_glucose_0.1percent_32C_10days	0.997	1.021	-0.072	0.003	0.038	0.232809	0.768185
SPBC409.17c	YES_glucose_0.1percent_32C_10days	1.067	1.099	0.11	0.065	0.108	0.10873	0.722422
SPAC23A1.14c	YES_glucose_0.1percent_32C_10days	1.118	1.121	0.183	0.101	0.107	0.191083	0.755607
SPAC25A8.01c	YES_glucose_0.1percent_32C_10days	1.026	1.023	0.057	0.021	0.016	0.574198	0.870601
SPAC14C4.04	YES_glucose_0.1percent_32C_10days	1.051	1.053	0.039	0.024	0.027	0.077781	0.697535
SPAPB21F2.02	YES_glucose_0.1percent_32C_10days	1.072	1.066	0.283	0.212	0.205	0.253505	0.768476
SPAC767.01c	YES_glucose_0.1percent_32C_10days	1.05	1.053	0.065	0.045	0.049	0.301718	0.788544
SPBC115.03	YES_glucose_0.1percent_32C_10days	0.961	0.941	-0.141	-0.091	-0.121	0.624614	0.892866
SPBP35G2.02	YES_glucose_0.1percent_32C_10days	0.992	1	-0.101	0.004	0.018	0.972737	0.992427
SPAC25G10.09c	YES_glucose_0.1percent_32C_10days	0.919	0.918	-0.06	-0.057	-0.059	0.485638	0.850954
SPCC965.14c	YES_glucose_0.1percent_32C_10days	1.059	1.057	0.061	0.043	0.041	0.0405453	0.681601
SPAC13G7.06	YES_glucose_0.1percent_32C_10days	0.915	0.919	-0.097	-0.035	-0.027	0.964433	0.990941
SPAPB8E5.03	YES_glucose_0.1percent_32C_10days	1.159	1.16	0.174	0.127	0.129	0.0888859	0.699234
SPAPJ698.02c	YES_glucose_0.1percent_32C_10days	0.475	0.559	1.609	0.813	1.287	0.449223	0.836288
SPAC4D7.07c	YES_glucose_0.1percent_32C_10days	1.012	1.009	0.06	0.052	0.047	0.165857	0.742625
SPBC27B12.03c	YES_glucose_0.1percent_32C_10days	0.967	0.962	-0.158	-0.121	-0.127	0.276027	0.780928
SPCC18.09c	YES_glucose_0.1percent_32C_10days	1.073	1.071	0.1	0.064	0.061	0.0322534	0.681601
SPCC1840.08c	YES_glucose_0.1percent_32C_10days	0.966	0.955	-0.067	-0.031	-0.047	0.623903	0.892768
SPAC29A4.19c	YES_glucose_0.1percent_32C_10days	1.003	1.017	-0.081	-0.038	-0.018	0.63152	0.896822
SPAC694.04c	YES_glucose_0.1percent_32C_10days	0.936	0.948	-0.128	-0.066	-0.047	0.111627	0.722422
SPCPB16A4.04c	YES_glucose_0.1percent_32C_10days	0.872	0.85	-0.117	-0.058	-0.093	0.19323	0.756356
SPAC22F3.10c	YES_glucose_0.1percent_32C_10days	0.916	0.932	-0.127	-0.063	-0.038	0.0364283	0.681601
SPBC2G2.08	YES_glucose_0.1percent_32C_10days	0.806	0.79	-0.302	-0.235	-0.261	0.435641	0.832104
SPAPB24D3.08c	YES_glucose_0.1percent_32C_10days	1.006	1.006	0.08	0.018	0.019	0.586483	0.873424
SPAC458.06	YES_glucose_0.1percent_32C_10days	1.025	1.026	0.078	0.018	0.02	0.298801	0.788544
SPAC823.15	YES_glucose_0.1percent_32C_10days	1.094	1.091	0.119	0.106	0.102	0.445192	0.834302
SPBC20F10.10	YES_glucose_0.1percent_32C_10days	1.096	1.11	0.086	0.026	0.045	0.948642	0.985523
SPCC1906.04	YES_glucose_0.1percent_32C_10days	1.013	0.987	0.105	0.031	-0.005	0.147016	0.738482
SPCC70.09c	YES_glucose_0.1percent_32C_10days	1.018	1.007	-0.032	-0.009	-0.025	0.190903	0.755607
SPBC3D6.04c	YES_glucose_0.1percent_32C_10days	0.963	0.937	-0.08	-0.038	-0.077	0.156866	0.738482
SPBC428.04	YES_glucose_0.1percent_32C_10days	0.931	0.945	0.117	0.051	0.073	0.169446	0.742625
SPBC651.06	YES_glucose_0.1percent_32C_10days	1.071	1.089	0.148	0.098	0.123	0.0982034	0.712344
SPCC1020.05	YES_glucose_0.1percent_32C_10days	1.021	1.028	-0.038	-0.006	0.004	0.323724	0.79537
SPAC8C9.16c	YES_glucose_0.1percent_32C_10days	1.056	1.07	0.088	0.02	0.041	0.168335	0.742625
SPCC297.04c	YES_glucose_0.1percent_32C_10days	1.039	1.052	0.039	0.019	0.038	0.229282	0.767729
SPAC20G4.01	YES_glucose_0.1percent_32C_10days	1.02	1.023	0.097	0.055	0.06	0.193201	0.756356
SPBP8B7.04	YES_glucose_0.1percent_32C_10days	1.031	1.053	-0.051	0.013	0.044	0.535506	0.862431
SPCC965.13	YES_glucose_0.1percent_32C_10days	1.004	0.986	-0.055	-0.021	-0.047	0.585462	0.873385
SPAC821.04c	YES_glucose_0.1percent_32C_10days	0.982	0.997	-0.053	-0.007	0.015	0.0710835	0.693022
SPBC3H7.09	YES_glucose_0.1percent_32C_10days	1.08	1.074	0.389	0.326	0.319	0.0200863	0.662964
SPAC18G6.04c	YES_glucose_0.1percent_32C_10days	1.015	1.015	-0.035	-0.008	-0.009	0.478966	0.848914
SPBC530.11c	YES_glucose_0.1percent_32C_10days	0.925	0.935	-0.132	-0.097	-0.081	0.223295	0.763342
SPBC776.14	YES_glucose_0.1percent_32C_10days	0.963	0.984	-0.163	-0.089	-0.057	0.353914	0.798753
SPAC26H5.09c	YES_glucose_0.1percent_32C_10days	1.008	1.015	-0.06	-0.037	-0.027	0.773481	0.937468
SPAC17H9.04c	YES_glucose_0.1percent_32C_10days	1.142	1.123	0.271	0.185	0.162	0.163779	0.742625
SPBC1711.11	YES_glucose_0.1percent_32C_10days	1.069	1.054	0.07	0.029	0.009	0.440983	0.833081
SPAC23H4.09	YES_glucose_0.1percent_32C_10days	1.044	1.047	-0.037	-0.022	-0.017	0.976048	0.993424
SPBC11C11.02	YES_glucose_0.1percent_32C_10days	0.755	0.75	-0.504	-0.294	-0.293	0.22311	0.763342
SPBC646.06c	YES_glucose_0.1percent_32C_10days	1.073	1.062	0.088	0.048	0.033	0.509008	0.854188
SPAC22E12.06c	YES_glucose_0.1percent_32C_10days	1.13	1.132	0.081	0.052	0.055	0.994486	0.996945
SPCC895.07	YES_glucose_0.1percent_32C_10days	1.019	0.989	0.189	0.103	0.061	0.368015	0.801541
SPCC162.04c	YES_glucose_0.1percent_32C_10days	1.072	1.072	0.016	0.012	0.012	0.00054157	0.308221
SPAC1D4.09c	YES_glucose_0.1percent_32C_10days	1.048	1.079	0.08	0.029	0.072	0.941373	0.985379
SPBC26H8.14c	YES_glucose_0.1percent_32C_10days	0.978	0.972	-0.079	-0.019	-0.028	0.0879404	0.699234
SPAC14C4.08	YES_glucose_0.1percent_32C_10days	1.028	1.031	-0.087	-0.022	-0.017	0.841006	0.96163
SPBC83.10	YES_glucose_0.1percent_32C_10days	0.893	0.895	0.143	0.079	0.084	0.978727	0.99356
SPCC1393.03	YES_glucose_0.1percent_32C_10days	0.813	0.825	-0.161	-0.084	-0.061	0.863055	0.967942
SPAC2G11.04	YES_glucose_0.1percent_32C_10days	1.043	1.043	0.061	0.001	0.002	0.115566	0.728628
SPAC1002.01	YES_glucose_0.1percent_32C_10days	1.085	1.145	-0.188	-0.017	0.065	0.748976	0.93412
SPAC26A3.01	YES_glucose_0.1percent_32C_10days	0.884	0.879	-0.239	-0.169	-0.176	0.15707	0.738482
SPAPB24D3.03	YES_glucose_0.1percent_32C_10days	1.017	1.004	-0.068	-0.027	-0.045	0.540375	0.865266
SPAC6G9.16c	YES_glucose_0.1percent_32C_10days	1.028	1.014	-0.094	-0.049	-0.068	0.758315	0.934659
SPBC19G7.02	YES_glucose_0.1percent_32C_10days	0.939	0.862	0.202	-0.035	-0.148	0.761543	0.934659
SPBC1E8.02	YES_glucose_0.1percent_32C_10days	1.072	1.083	-0.091	0.006	0.023	0.622846	0.892454
SPBC1A4.05	YES_glucose_0.1percent_32C_10days	0.984	1.036	-0.275	-0.048	0.036	0.504154	0.854188
SPAC13A11.01c	YES_glucose_0.1percent_32C_10days	1.032	1.062	0.14	0.093	0.136	0.987142	0.994696
SPCC16A11.15c	YES_glucose_0.1percent_32C_10days	1.072	1.065	0.117	0.021	0.013	0.572299	0.870601
SPAC29B12.11c	YES_glucose_0.1percent_32C_10days	1.07	1.062	0.129	0.046	0.037	0.383305	0.804984
SPBC29A10.06c	YES_glucose_0.1percent_32C_10days	1.075	1.053	0.125	0.059	0.031	0.796856	0.946999
SPAC1687.10	YES_glucose_0.1percent_32C_10days	1.036	1.038	0.02	0.013	0.015	0.712742	0.920996
SPAC8F11.10c	YES_glucose_0.1percent_32C_10days	1.09	1.084	0.099	0.012	0.005	0.917944	0.982815
SPAC3C7.07c	YES_glucose_0.1percent_32C_10days	1.091	1.035	0.163	0.016	-0.057	0.517343	0.854284
SPBC776.16	YES_glucose_0.1percent_32C_10days	1.059	1.045	0.047	-0.004	-0.023	0.24293	0.768185
SPAC19B12.12c	YES_glucose_0.1percent_32C_10days	1.075	1.05	-0.062	-0.023	-0.056	0.57538	0.870601
SPCC1223.12c	YES_glucose_0.1percent_32C_10days	1.003	0.989	0.078	0.014	-0.005	0.343727	0.798753
SPAC11D3.13	YES_glucose_0.1percent_32C_10days	1.094	1.086	-0.03	-0.006	-0.016	0.550908	0.867991
SPBC3B9.04	YES_glucose_0.1percent_32C_10days	1.047	1.049	-0.13	-0.072	-0.068	0.722424	0.923027
SPCC1906.02c	YES_glucose_0.1percent_32C_10days	0.975	0.944	0.182	0.072	0.028	0.913519	0.981486
SPCC576.13	YES_glucose_0.1percent_32C_10days	1.004	0.977	0.138	0.039	0.001	0.120378	0.728628
SPAC17A2.10c	YES_glucose_0.1percent_32C_10days	1.24	1.271	0.243	0.187	0.224	0.122319	0.728628
SPCC1682.14	YES_glucose_0.1percent_32C_10days	0.923	0.913	0.267	0.214	0.199	0.277617	0.780928
SPBC17G9.08c	YES_glucose_0.1percent_32C_10days	1.063	1.049	0.046	-0.005	-0.023	0.92195	0.984638
SPAC1556.04c	YES_glucose_0.1percent_32C_10days	1.134	1.164	0.127	0.03	0.071	0.412111	0.819128
SPCC825.05c	YES_glucose_0.1percent_32C_10days	0.953	0.956	-0.129	-0.054	-0.049	0.119905	0.728628
SPBC582.05c	YES_glucose_0.1percent_32C_10days	0.993	0.987	0.064	0.039	0.031	0.295766	0.7877
SPAC15E1.02c	YES_glucose_0.1percent_32C_10days	1.056	1.049	0.046	0.014	0.005	0.0474356	0.681601
SPAC6C3.03c	YES_glucose_0.1percent_32C_10days	1.062	1.053	-0.07	-0.041	-0.053	0.733047	0.926775
SPAC17G8.11c	YES_glucose_0.1percent_32C_10days	0.877	0.861	0.336	0.124	0.107	0.635296	0.897154
SPAC3A11.07	YES_glucose_0.1percent_32C_10days	1.111	1.134	0.21	0.11	0.142	0.227221	0.765348
SPAC23D3.04c	YES_glucose_0.1percent_32C_10days	0.857	0.864	-0.37	-0.183	-0.164	0.487314	0.850954
SPAC4F8.03	YES_glucose_0.1percent_32C_10days	1.007	1.006	0.224	0.12	0.121	0.699453	0.914108
SPCC970.01	YES_glucose_0.1percent_32C_10days	0.976	0.978	0.062	0.044	0.046	0.788749	0.944673
SPAC4G8.10	YES_glucose_0.1percent_32C_10days	1.126	1.181	0.588	0.408	0.488	0.221752	0.761558
SPAC140.03	YES_glucose_0.1percent_32C_10days	0.929	0.928	-0.139	-0.048	-0.047	0.415283	0.821315
SPAPB8E5.06c	YES_glucose_0.1percent_32C_10days	1.001	1.015	0.15	0.083	0.105	0.834877	0.959321
SPBC21D10.12	YES_glucose_0.1percent_32C_10days	1.128	1.171	0.205	0.143	0.2	0.166767	0.742625
SPAC167.06c	YES_glucose_0.1percent_32C_10days	1.016	0.992	0.112	0.039	0.005	0.296616	0.788544
SPAC869.11	YES_glucose_0.1percent_32C_10days	0.89	0.921	-0.157	-0.037	0.014	0.29044	0.7834
SPBP4H10.17c	YES_glucose_0.1percent_32C_10days	1.064	1.067	0.097	0.034	0.039	0.550311	0.867991
SPAC823.12	YES_glucose_0.1percent_32C_10days	0.77	0.741	0.179	0.069	0.015	0.674082	0.901638
SPBC3B8.02	YES_glucose_0.1percent_32C_10days	0.958	0.961	-0.063	-0.032	-0.028	0.368994	0.801541
SPAC186.06	YES_glucose_0.1percent_32C_10days	1.025	1.027	0.032	0.009	0.012	0.937109	0.985379
SPBC11B10.10c	YES_glucose_0.1percent_32C_10days	0.956	0.941	0.309	0.238	0.216	0.309647	0.792756
SPAC11E3.03	YES_glucose_0.1percent_32C_10days	0.967	0.968	0.106	0.027	0.03	0.957281	0.988001
SPBC21C3.06	YES_glucose_0.1percent_32C_10days	0.981	0.99	-0.134	-0.049	-0.035	0.803345	0.949277
SPBP35G2.04c	YES_glucose_0.1percent_32C_10days	0.93	0.932	-0.089	-0.013	-0.008	0.686084	0.907266
SPAC26F1.07	YES_glucose_0.1percent_32C_10days	1.006	1	0.056	0.002	-0.006	0.787391	0.944395
SPAC17A2.07c	YES_glucose_0.1percent_32C_10days	0.984	0.963	-0.078	-0.038	-0.068	0.980904	0.99356
SPAC13G7.12c	YES_glucose_0.1percent_32C_10days	1.025	1.025	-0.155	-0.042	-0.039	0.383541	0.804984
SPBC1306.02	YES_glucose_0.1percent_32C_10days	0.997	0.999	0.021	0.01	0.012	0.986994	0.994696
SPBC11C11.01	YES_glucose_0.1percent_32C_10days	1.028	1.024	0.061	0.028	0.023	0.262027	0.774836
SPAC823.09c	YES_glucose_0.1percent_32C_10days	1.028	1.045	-0.077	-0.006	0.019	0.681516	0.905737
SPBC28F2.03	YES_glucose_0.1percent_32C_10days	1.009	0.997	0.081	0.03	0.013	0.943011	0.985379
SPCC285.04	YES_glucose_0.1percent_32C_10days	1.039	1.035	-0.027	-0.008	-0.013	0.947317	0.985523
SPCC645.12c	YES_glucose_0.1percent_32C_10days	1.01	1.008	0.03	0.01	0.007	0.478737	0.848914
SPCC126.08c	YES_glucose_0.1percent_32C_10days	1.013	1.035	0.245	0.106	0.142	0.931902	0.985379
SPAC3G9.01	YES_glucose_0.1percent_32C_10days	1.046	1.067	0.161	0.119	0.149	0.274192	0.780928
SPAC6B12.14c	YES_glucose_0.1percent_32C_10days	1.039	1.042	0.066	0.051	0.055	0.0167316	0.655279
SPCC1322.07c	YES_glucose_0.1percent_32C_10days	1.014	1.039	-0.117	-0.038	-0.002	0.583521	0.872991
SPBC31F10.08	YES_glucose_0.1percent_32C_10days	0.978	0.944	0.102	-0.007	-0.057	0.702447	0.916133
SPBC1198.01	YES_glucose_0.1percent_32C_10days	0.989	0.975	0.041	-0.008	-0.028	0.577221	0.870601
SPAC4H3.01	YES_glucose_0.1percent_32C_10days	0.991	0.985	0.059	0.005	-0.003	0.469098	0.846691
SPAC823.16c	YES_glucose_0.1percent_32C_10days	1.029	1.036	-0.08	-0.05	-0.039	0.933302	0.985379
SPBC215.11c	YES_glucose_0.1percent_32C_10days	1.001	1.001	-0.102	-0.044	-0.043	0.157048	0.738482
SPCC794.02	YES_glucose_0.1percent_32C_10days	1.017	1.001	-0.036	-0.014	-0.036	0.568473	0.870601
SPCC825.02	YES_glucose_0.1percent_32C_10days	0.977	0.951	0.188	0.099	0.062	0.511203	0.854188
SPBC3D6.06c	YES_glucose_0.1percent_32C_10days	1.008	1.025	-0.095	-0.024	0.001	0.806101	0.949277
SPAC4F10.04	YES_glucose_0.1percent_32C_10days	0.963	0.972	0.174	0.141	0.155	0.252953	0.768185
SPBPB2B2.07c	YES_glucose_0.1percent_32C_10days	0.994	0.974	-0.097	-0.042	-0.07	0.630679	0.896397
SPCC1259.08	YES_glucose_0.1percent_32C_10days	1.025	1.032	0.122	0.073	0.083	0.866122	0.96915
SPBC12D12.09	YES_glucose_0.1percent_32C_10days	0.934	0.942	-0.169	-0.1	-0.086	0.175098	0.744526
SPCC18.06c	YES_glucose_0.1percent_32C_10days	0.455	0.528	-2.421	-0.493	0.214	0.841993	0.96163
SPCC306.07c	YES_glucose_0.1percent_32C_10days	1.015	0.976	0.107	-0.016	-0.069	0.206909	0.760257
SPBP8B7.13	YES_glucose_0.1percent_32C_10days	1.079	1.08	0.201	0.198	0.199	0.648627	0.897169
SPCC285.15c	YES_glucose_0.1percent_32C_10days	0.943	0.956	0.308	0.187	0.211	0.193121	0.756356
SPCC970.05	YES_glucose_0.1percent_32C_10days	0.902	0.884	0.219	0.108	0.082	0.419119	0.823704
SPCC417.03	YES_glucose_0.1percent_32C_10days	1.032	1.038	0.095	0.043	0.052	0.282753	0.780928
SPBC839.03c	YES_glucose_0.1percent_32C_10days	1.041	1.02	0.317	0.221	0.194	0.212843	0.760257
SPAC1952.10c	YES_glucose_0.1percent_32C_10days	1.079	1.06	0.145	0.09	0.065	0.772898	0.937468
SPCC24B10.08c	YES_glucose_0.1percent_32C_10days	0.841	0.816	0.2	0.054	0.015	0.245742	0.768185
SPBP8B7.02	YES_glucose_0.1percent_32C_10days	1.014	1.007	-0.046	-0.01	-0.02	0.0685234	0.693022
SPAC29A4.09	YES_glucose_0.1percent_32C_10days	0.862	0.861	-0.227	-0.184	-0.185	0.533724	0.862208
SPAC1527.03	YES_glucose_0.1percent_32C_10days	1.041	1.054	-0.133	-0.022	-0.001	0.851664	0.963025
SPBC20F10.03	YES_glucose_0.1percent_32C_10days	1.051	1.039	0.107	0.037	0.022	0.397333	0.808744
SPAC1F7.12	YES_glucose_0.1percent_32C_10days	1.04	1.045	-0.051	-0.031	-0.023	0.385056	0.80655
SPBC106.03	YES_glucose_0.1percent_32C_10days	1.112	1.11	0.053	0.035	0.033	0.236547	0.768185
SPCC594.06c	YES_glucose_0.1percent_32C_10days	1.123	1.081	0.306	0.142	0.093	0.970178	0.991013
SPBC14F5.11c	YES_glucose_0.1percent_32C_10days	1.093	1.079	0.114	0.051	0.032	0.569457	0.870601
SPAC14C4.09	YES_glucose_0.1percent_32C_10days	0.863	0.911	0.431	0.303	0.389	0.0312128	0.681601
SPBP35G2.07	YES_glucose_0.1percent_32C_10days	0.881	0.945	-0.346	-0.102	0.009	0.323016	0.795062
SPBC28E12.03	YES_glucose_0.1percent_32C_10days	0.904	0.931	-0.105	-0.004	0.04	0.330389	0.797006
SPAC3A11.04	YES_glucose_0.1percent_32C_10days	1.014	1.009	-0.149	-0.054	-0.059	0.400249	0.808744
SPBC887.06c	YES_glucose_0.1percent_32C_10days	1.076	1.113	-0.149	-0.034	0.017	0.464883	0.844189
SPAC17A5.18c	YES_glucose_0.1percent_32C_10days	1.066	1.064	0.024	0.017	0.015	0.65071	0.897169
SPAPB8E5.08	YES_glucose_0.1percent_32C_10days	1.085	1.084	0.114	0.05	0.05	0.927397	0.985379
SPAC3A11.14c	YES_glucose_0.1percent_32C_10days	1.034	1.026	0.048	0.003	-0.007	0.373896	0.801541
SPBC3D6.05	YES_glucose_0.1percent_32C_10days	0.971	0.96	-0.082	-0.029	-0.044	0.746495	0.93412
SPBC24C6.10c	YES_glucose_0.1percent_32C_10days	0.812	0.8	-0.101	-0.071	-0.092	0.210666	0.760257
SPAC17C9.11c	YES_glucose_0.1percent_32C_10days	1.099	1.105	0.104	0.055	0.063	0.375309	0.801541
SPBC30D10.03c	YES_glucose_0.1percent_32C_10days	1.091	1.082	0.061	0.028	0.016	0.0733722	0.693022
SPAC2C4.07c	YES_glucose_0.1percent_32C_10days	1.005	1.002	-0.057	-0.03	-0.034	0.937082	0.985379
SPBC29A3.02c	YES_glucose_0.1percent_32C_10days	1.003	1.004	-0.03	-0.015	-0.013	0.302867	0.788544
SPAC1834.07	YES_glucose_0.1percent_32C_10days	1.04	1.036	0.071	0.02	0.015	0.532514	0.861668
SPAC17G6.15c	YES_glucose_0.1percent_32C_10days	0.889	0.896	-0.212	-0.169	-0.156	0.386652	0.80655
SPBC800.05c	YES_glucose_0.1percent_32C_10days	0.969	0.956	-0.122	-0.048	-0.066	0.0902354	0.699234
SPAC29A4.05	YES_glucose_0.1percent_32C_10days	1.101	1.091	0.057	0.032	0.02	0.664471	0.900448
SPBC215.10	YES_glucose_0.1percent_32C_10days	1.038	1.029	-0.031	-0.008	-0.021	0.360932	0.799256
SPBC649.04	YES_glucose_0.1percent_32C_10days	1.032	1.002	0.119	0.017	-0.024	0.780251	0.941039
SPAC31G5.17c	YES_glucose_0.1percent_32C_10days	1.145	1.123	0.183	0.083	0.057	0.224685	0.763342
SPBC3H7.11	YES_glucose_0.1percent_32C_10days	1.039	1.04	0.037	0.031	0.032	0.352806	0.798753
SPAC13G6.15c	YES_glucose_0.1percent_32C_10days	1.02	0.988	0.092	0.004	-0.041	0.509205	0.854188
SPCC594.02c	YES_glucose_0.1percent_32C_10days	1.048	1.024	0.21	0.118	0.086	0.0305781	0.681601
SPAC2F3.08	YES_glucose_0.1percent_32C_10days	1.084	1.126	0.098	0.04	0.097	0.185056	0.749529
SPCC1739.06c	YES_glucose_0.1percent_32C_10days	0.956	0.951	0.11	0.04	0.033	0.549273	0.867991
SPBC14F5.09c	YES_glucose_0.1percent_32C_10days	0.871	0.871	-0.125	-0.123	-0.123	0.388787	0.808007
SPCP1E11.04c	YES_glucose_0.1percent_32C_10days	0.992	0.997	-0.065	-0.019	-0.011	0.264554	0.775364
SPAC29B12.08	YES_glucose_0.1percent_32C_10days	1.015	1.016	0.042	0.033	0.035	0.765261	0.93498
SPAC1002.02	YES_glucose_0.1percent_32C_10days	1.057	1.073	-0.043	0.008	0.03	0.486125	0.850954
SPBC28E12.02	YES_glucose_0.1percent_32C_10days	1.056	1.059	0.105	0.053	0.058	0.525079	0.855245
SPAC17A5.07c	YES_glucose_0.1percent_32C_10days	1.051	1.05	0.074	0.054	0.052	0.197691	0.759887
SPBC1198.08	YES_glucose_0.1percent_32C_10days	0.98	0.981	-0.079	-0.07	-0.069	0.410908	0.818665
SPAC1952.05	YES_glucose_0.1percent_32C_10days	0.96	0.94	0.178	0.075	0.046	0.0745694	0.693022
SPAC20G4.08	YES_glucose_0.1percent_32C_10days	1.026	1.018	0.067	0.04	0.029	0.0182562	0.655279
SPAC23D3.11	YES_glucose_0.1percent_32C_10days	0.99	1	-0.117	-0.058	-0.043	0.167992	0.742625
SPBC1718.03	YES_glucose_0.1percent_32C_10days	0.898	1.024	0.582	0.227	0.475	0.687421	0.907266
SPAC4G9.11c	YES_glucose_0.1percent_32C_10days	1.012	1.015	-0.054	-0.022	-0.018	0.0611293	0.681601
SPCC306.09c	YES_glucose_0.1percent_32C_10days	0.609	0.718	-1.343	-0.272	0.139	NaN	NaN
SPAC4G8.11c	YES_glucose_0.1percent_32C_10days	0.762	0.7	-0.456	-0.251	-0.356	0.546601	0.867501
SPAC19G12.08	YES_glucose_0.1percent_32C_10days	0.906	0.916	-0.186	-0.039	-0.019	0.940995	0.985379
SPAPYUG7.04c	YES_glucose_0.1percent_32C_10days	1.044	1.061	-0.113	-0.036	-0.012	0.0400432	0.681601
SPBC21H7.03c	YES_glucose_0.1percent_32C_10days	0.993	0.996	-0.078	-0.025	-0.021	0.853	0.963025
SPAC1783.06c	YES_glucose_0.1percent_32C_10days	0.984	0.976	-0.079	-0.028	-0.039	0.725455	0.924825
SPAC8C9.05	YES_glucose_0.1percent_32C_10days	1.025	1.021	0.026	0	-0.005	0.618146	0.892454
SPBP8B7.28c	YES_glucose_0.1percent_32C_10days	0.57	0.57	0.416	0.372	0.372	NaN	NaN
SPAC31A2.12	YES_glucose_0.1percent_32C_10days	0.991	0.986	0.146	0.09	0.083	0.768799	0.935102
SPBC26H8.12	YES_glucose_0.1percent_32C_10days	0.449	0.183	-2.146	-1.298	-2.09	0.283208	0.780928
SPAC25H1.06	YES_glucose_0.1percent_32C_10days	1.033	1.039	-0.088	-0.011	-0.001	0.955781	0.988001
SPBC12C2.09c	YES_glucose_0.1percent_32C_10days	1.01	0.993	0.107	0.01	-0.013	0.945112	0.985379
SPAC1296.02	YES_glucose_0.1percent_32C_10days	0.941	0.958	-0.094	-0.023	0.004	0.727153	0.926068
SPBC29A3.08	YES_glucose_0.1percent_32C_10days	1.065	1.077	0.1	0.077	0.093	0.0567508	0.681601
SPBP4H10.05c	YES_glucose_0.1percent_32C_10days	0.943	0.912	0.095	0.002	-0.045	0.624242	0.892866
SPAC4G9.16c	YES_glucose_0.1percent_32C_10days	0.913	0.913	0.425	0.293	0.297	0.156722	0.738482
SPAC17H9.13c	YES_glucose_0.1percent_32C_10days	0.919	0.913	-0.091	-0.06	-0.07	0.95631	0.988001
SPAC1610.02c	YES_glucose_0.1percent_32C_10days	0.781	0.824	-0.437	-0.27	-0.188	0.179986	0.749462
SPBC16C6.01c	YES_glucose_0.1percent_32C_10days	1.104	1.1	0.097	0.064	0.06	0.855973	0.963765
SPBC15D4.05	YES_glucose_0.1percent_32C_10days	1.02	1	0.123	0.038	0.01	0.672497	0.901638
SPBC1604.03c	YES_glucose_0.1percent_32C_10days	0.883	0.865	0.34	0.266	0.237	NaN	NaN
SPBC2A9.13	YES_glucose_0.1percent_32C_10days	1.045	1.035	0.078	0.026	0.013	0.312711	0.794389
SPCC306.02c	YES_glucose_0.1percent_32C_10days	1.016	1.014	0.135	0.094	0.091	0.0615413	0.681601
SPCC830.08c	YES_glucose_0.1percent_32C_10days	1.045	1.046	0.09	0.018	0.02	0.646284	0.897169
SPCC16C4.13c	YES_glucose_0.1percent_32C_10days	0.806	0.829	0.29	0.174	0.22	0.353686	0.798753
SPAC688.12c	YES_glucose_0.1percent_32C_10days	1.04	1.042	0.033	0.014	0.016	0.631348	0.896822
SPAC6C3.07	YES_glucose_0.1percent_32C_10days	0.995	1.002	-0.05	-0.007	0.004	0.509705	0.854188
SPCC1259.09c	YES_glucose_0.1percent_32C_10days	1.052	1.058	0.073	0.027	0.036	0.0990422	0.714416
SPBC405.05	YES_glucose_0.1percent_32C_10days	0.99	0.989	-0.113	-0.06	-0.061	0.396921	0.808744
SPBC1271.12	YES_glucose_0.1percent_32C_10days	0.961	0.953	0.199	0.004	0	0.981203	0.99356
SPAC5D6.10c	YES_glucose_0.1percent_32C_10days	1.078	1.067	0.139	0.093	0.079	0.0811682	0.699234
SPBC106.07c	YES_glucose_0.1percent_32C_10days	0.976	0.974	-0.019	-0.006	-0.009	0.377725	0.801541
SPBC21B10.07	YES_glucose_0.1percent_32C_10days	1.113	1.117	0.198	0.141	0.147	0.507195	0.854188
SPAC3F10.09	YES_glucose_0.1percent_32C_10days	0.904	0.913	-0.098	-0.054	-0.039	0.261462	0.774836
SPCP31B10.02	YES_glucose_0.1percent_32C_10days	1.034	1.015	0.08	0.007	-0.019	0.393535	0.808007
SPBC609.04	YES_glucose_0.1percent_32C_10days	1.058	1.049	0.162	0.039	0.03	0.548762	0.867991
SPAC9.11	YES_glucose_0.1percent_32C_10days	1.093	1.093	0.107	0.094	0.094	0.00867954	0.598769
SPCC16A11.07	YES_glucose_0.1percent_32C_10days	0.634	0.693	-1.108	-0.52	-0.333	0.318759	0.794389
SPCC1259.14c	YES_glucose_0.1percent_32C_10days	1.075	1.073	0.091	0.037	0.035	0.431653	0.831302
SPAC3H5.05c	YES_glucose_0.1percent_32C_10days	0.933	0.927	0.269	0.144	0.138	0.283974	0.780928
SPCC191.06	YES_glucose_0.1percent_32C_10days	1.039	1.045	0.086	0.037	0.045	0.223468	0.763342
SPCC330.03c	YES_glucose_0.1percent_32C_10days	1.061	1.07	0.072	0.041	0.053	0.344993	0.798753
SPAC3G6.05	YES_glucose_0.1percent_32C_10days	0.957	0.983	-0.145	-0.055	-0.014	0.644182	0.897169
SPAC11H11.02c	YES_glucose_0.1percent_32C_10days	1.026	1.041	0.084	0.018	0.041	0.360871	0.799256
SPCP31B10.05	YES_glucose_0.1percent_32C_10days	1.025	1.012	0.085	0.04	0.022	0.305935	0.790695
SPCC548.04	YES_glucose_0.1percent_32C_10days	1.021	1.008	0.093	0.019	0.001	0.370932	0.801541
SPBC947.03c	YES_glucose_0.1percent_32C_10days	1.075	1.077	0.123	0.114	0.117	0.0426645	0.681601
SPAC19G12.09	YES_glucose_0.1percent_32C_10days	1.034	1.039	0.033	0.025	0.032	0.925498	0.985379
SPBC2G2.15c	YES_glucose_0.1percent_32C_10days	0.996	0.989	0.042	-0.004	-0.013	0.649755	0.897169
SPBPJ4664.05	YES_glucose_0.1percent_32C_10days	1.036	1.026	-0.04	-0.023	-0.037	0.512761	0.854188
SPAC31G5.11	YES_glucose_0.1percent_32C_10days	1.064	1.036	0.173	0.079	0.041	0.156491	0.738482
SPBC23E6.03c	YES_glucose_0.1percent_32C_10days	0.995	1.01	-0.07	-0.02	0.002	0.354185	0.798753
SPAC5D6.13	YES_glucose_0.1percent_32C_10days	1.064	1.093	0.332	0.213	0.256	0.207902	0.760257
SPBC4B4.12c	YES_glucose_0.1percent_32C_10days	1.016	1.015	0.064	0.025	0.024	0.267669	0.776999
SPBC6B1.03c	YES_glucose_0.1percent_32C_10days	1.05	1.054	0.1	0.048	0.054	0.112153	0.722422
SPBC530.15c	YES_glucose_0.1percent_32C_10days	1.044	1.03	0.066	0.019	-0.001	0.966949	0.990941
SPCC5E4.10c	YES_glucose_0.1percent_32C_10days	0.989	1.002	-0.133	-0.026	-0.005	0.352207	0.798753
SPCC1682.11c	YES_glucose_0.1percent_32C_10days	0.944	0.946	-0.163	-0.116	-0.112	0.251072	0.768185
SPBC13E7.03c	YES_glucose_0.1percent_32C_10days	0.988	0.98	-0.156	-0.082	-0.093	0.0672971	0.688355
SPAC3A11.13	YES_glucose_0.1percent_32C_10days	0.996	0.993	0.206	0.193	0.188	0.122303	0.728628
SPAC1565.03	YES_glucose_0.1percent_32C_10days	1.043	1.04	0.035	0.006	0.002	0.935762	0.985379
SPCC364.02c	YES_glucose_0.1percent_32C_10days	1.032	1.034	-0.047	-0.003	0.001	0.561424	0.870601
SPAC3C7.14c	YES_glucose_0.1percent_32C_10days	1.029	1.046	0.043	0.018	0.042	0.924823	0.985213
SPBC530.07c	YES_glucose_0.1percent_32C_10days	1.043	1.046	-0.013	-0.003	0.001	0.430434	0.831295
SPBC1271.03c	YES_glucose_0.1percent_32C_10days	1.035	1.051	0.056	0.032	0.054	0.322012	0.794389
SPCC1739.13	YES_glucose_0.1percent_32C_10days	1.023	1.017	0.118	0.029	0.022	0.790122	0.945303
SPBC651.12c	YES_glucose_0.1percent_32C_10days	1.009	1.02	-0.048	-0.009	0.007	0.547951	0.867991
SPBC2F12.09c	YES_glucose_0.1percent_32C_10days	0.98	0.98	-0.087	-0.027	-0.026	0.304023	0.788544
SPAC1B3.07c	YES_glucose_0.1percent_32C_10days	0.954	0.965	-0.182	-0.117	-0.099	0.446454	0.835277
SPAC19D5.01	YES_glucose_0.1percent_32C_10days	1.049	1.048	0.092	0.056	0.055	0.257728	0.773913
SPCC18B5.09c	YES_glucose_0.1percent_32C_10days	1.06	1.047	0.119	0.039	0.023	0.474325	0.847803
SPBC354.01	YES_glucose_0.1percent_32C_10days	1.076	1.087	0.061	0.032	0.047	0.442	0.833081
SPAC328.05	YES_glucose_0.1percent_32C_10days	1.05	1.065	-0.063	0.004	0.025	0.606961	0.884258
SPBC2G2.09c	YES_glucose_0.1percent_32C_10days	0.984	0.979	-0.087	-0.05	-0.057	0.283949	0.780928
SPAC1A6.06c	YES_glucose_0.1percent_32C_10days	1.033	1.032	0.034	0.006	0.005	0.127691	0.728628
SPACUNK4.09	YES_glucose_0.1percent_32C_10days	1.002	0.995	-0.027	-0.011	-0.021	0.736528	0.927749
SPAC343.09	YES_glucose_0.1percent_32C_10days	1.021	1.039	0.087	0.037	0.062	0.319243	0.794389
SPBC887.17	YES_glucose_0.1percent_32C_10days	0.982	0.986	-0.021	-0.003	0.003	0.83121	0.95866
SPBC428.06c	YES_glucose_0.1percent_32C_10days	0.833	0.823	-0.383	-0.213	-0.223	0.113933	0.727218
SPBC23E6.01c	YES_glucose_0.1percent_32C_10days	0.941	0.921	-0.118	-0.074	-0.105	0.281201	0.780928
SPAC24B11.10c	YES_glucose_0.1percent_32C_10days	0.976	0.971	0.271	0.125	0.123	0.151444	0.738482
SPCC1753.03c	YES_glucose_0.1percent_32C_10days	1.015	1.021	-0.054	-0.023	-0.014	0.4154	0.821315
SPAP8A3.04c	YES_glucose_0.1percent_32C_10days	1.066	1.071	0.065	0.033	0.041	0.151332	0.738482
SPBC685.03	YES_glucose_0.1percent_32C_10days	1.022	1.037	-0.09	-0.046	-0.025	0.137046	0.731127
SPBC15D4.01c	YES_glucose_0.1percent_32C_10days	1.058	1.08	-0.088	-0.02	0.01	0.81096	0.950568
SPCC594.04c	YES_glucose_0.1percent_32C_10days	0.929	0.911	0.242	0.184	0.156	0.133102	0.728628
SPBC25B2.08	YES_glucose_0.1percent_32C_10days	1.005	1	0.023	0.005	-0.002	0.461516	0.843112
SPCC191.09c	YES_glucose_0.1percent_32C_10days	1.038	1.039	0.051	0.026	0.027	0.905341	0.980479
SPAPJ760.02c	YES_glucose_0.1percent_32C_10days	1.037	1.034	0.035	0.022	0.018	0.0737576	0.693022
SPAC1002.06c	YES_glucose_0.1percent_32C_10days	1.021	1.016	0.064	0.028	0.021	0.0762964	0.693022
SPBC12D12.07c	YES_glucose_0.1percent_32C_10days	0.84	0.861	-0.375	-0.187	-0.145	0.178884	0.747255
SPAC1002.12c	YES_glucose_0.1percent_32C_10days	1.02	1.025	-0.051	-0.02	-0.012	0.239661	0.768185
SPBC19C2.09	YES_glucose_0.1percent_32C_10days	1.037	1.026	0.077	0.007	-0.008	0.196198	0.759887
SPAC17A5.10	YES_glucose_0.1percent_32C_10days	1.005	1.007	0.053	0.011	0.013	0.608665	0.885662
SPBC21B10.06c	YES_glucose_0.1percent_32C_10days	0.989	0.976	-0.074	-0.041	-0.059	0.345287	0.798753
SPAC1A6.08c	YES_glucose_0.1percent_32C_10days	1.013	1.007	-0.055	-0.013	-0.021	0.68112	0.905737
SPAC1B3.08	YES_glucose_0.1percent_32C_10days	1.06	1.055	-0.097	-0.053	-0.059	0.310199	0.792756
SPAC23H3.08c	YES_glucose_0.1percent_32C_10days	0.974	0.976	-0.048	-0.021	-0.018	0.0527742	0.681601
SPBC2D10.05	YES_glucose_0.1percent_32C_10days	1.014	1.011	-0.039	-0.036	-0.039	0.182955	0.749529
SPAC57A7.07c	YES_glucose_0.1percent_32C_10days	1.021	1.027	-0.078	-0.009	0.001	0.59546	0.879171
SPAC4H3.14c	YES_glucose_0.1percent_32C_10days	1.039	1.062	0.091	0.053	0.086	0.717255	0.920996
SPAC27D7.12c	YES_glucose_0.1percent_32C_10days	1.084	1.101	0.045	0.018	0.041	0.387387	0.807036
SPBC1105.02c	YES_glucose_0.1percent_32C_10days	0.979	0.971	-0.115	-0.041	-0.051	0.939893	0.985379
SPBC21C3.15c	YES_glucose_0.1percent_32C_10days	1.039	1.048	0.067	0.04	0.053	0.313198	0.794389
SPAC17G8.08c	YES_glucose_0.1percent_32C_10days	1.006	0.988	-0.057	-0.013	-0.038	0.943035	0.985379
SPBC1539.04	YES_glucose_0.1percent_32C_10days	0.944	0.985	-0.245	-0.086	-0.021	0.77485	0.937874
SPCC1020.09	YES_glucose_0.1percent_32C_10days	0.959	0.963	-0.108	-0.043	-0.035	0.203642	0.759887
SPAC1486.08	YES_glucose_0.1percent_32C_10days	0.947	0.932	0.073	0.016	-0.006	0.634939	0.897154
SPAC4A8.07c	YES_glucose_0.1percent_32C_10days	0.984	0.984	0.017	0.006	0.005	0.519877	0.854284
SPBC13E7.07	YES_glucose_0.1percent_32C_10days	0.991	1.005	-0.118	-0.042	-0.021	0.473546	0.847465
SPAC12B10.14c	YES_glucose_0.1percent_32C_10days	1.021	1.02	0.051	0.018	0.018	0.769373	0.935102
SPBC3B8.10c	YES_glucose_0.1percent_32C_10days	0.985	0.948	0.194	0.083	0.03	0.844213	0.96163
SPCC191.05c	YES_glucose_0.1percent_32C_10days	1.058	1.04	0.102	0.036	0.012	0.881345	0.97424
SPAC22F3.02	YES_glucose_0.1percent_32C_10days	1.046	1.051	0.1	0.038	0.046	0.0780042	0.697535
SPAC16A10.03c	YES_glucose_0.1percent_32C_10days	0.891	0.906	-0.282	-0.124	-0.095	0.993125	0.996703
SPBC16H5.07c	YES_glucose_0.1percent_32C_10days	1.016	1.041	0.169	0.093	0.13	0.673688	0.901638
SPBC1773.02c	YES_glucose_0.1percent_32C_10days	1.066	1.059	0.061	0.019	0.009	0.124655	0.728628
SPBC1711.06	YES_glucose_0.1percent_32C_10days	0.909	0.88	0.183	0.06	0.016	0.330213	0.797006
SPBC365.12c	YES_glucose_0.1percent_32C_10days	1.058	1.049	0.113	0.042	0.03	0.669698	0.901383
SPCC550.11	YES_glucose_0.1percent_32C_10days	0.988	0.972	0.28	0.153	0.133	0.246395	0.768185
SPAC17A5.05c	YES_glucose_0.1percent_32C_10days	1.038	1.055	0.084	0.043	0.068	0.668249	0.90124
SPAC9E9.14	YES_glucose_0.1percent_32C_10days	1.054	1.05	0.123	0.082	0.077	0.0640653	0.683331
SPAC890.06	YES_glucose_0.1percent_32C_10days	0.975	0.972	-0.078	-0.043	-0.048	0.393694	0.808007
SPCC1742.01	YES_glucose_0.1percent_32C_10days	1.077	1.078	-0.059	-0.003	-0.001	0.688897	0.907334
SPCC297.06c	YES_glucose_0.1percent_32C_10days	1.098	1.083	0.144	0.058	0.04	0.162042	0.742358
SPBC577.14c	YES_glucose_0.1percent_32C_10days	0.945	0.95	-0.129	-0.059	-0.051	0.296598	0.788544
SPBC1683.07	YES_glucose_0.1percent_32C_10days	0.973	0.982	-0.128	-0.06	-0.046	0.585533	0.873385
SPBC17G9.10	YES_glucose_0.1percent_32C_10days	0.622	0.622	-0.332	-0.105	-0.093	0.955419	0.988001
SPBC16E9.06c	YES_glucose_0.1percent_32C_10days	1.064	1.052	0.081	0.038	0.022	0.0721299	0.693022
SPBC23E6.10c	YES_glucose_0.1percent_32C_10days	1.007	1.001	-0.062	-0.015	-0.023	0.51096	0.854188
SPBC56F2.10c	YES_glucose_0.1percent_32C_10days	0.92	0.928	-0.101	-0.073	-0.061	0.205263	0.760257
SPAC10F6.07c	YES_glucose_0.1percent_32C_10days	1.033	1.04	0.041	0.029	0.038	0.0870006	0.699234
SPBC660.17c	YES_glucose_0.1percent_32C_10days	1	1.008	0.082	0.048	0.059	0.217451	0.760257
SPBC577.11	YES_glucose_0.1percent_32C_10days	0.93	0.955	-0.24	-0.081	-0.038	0.289288	0.7834
SPCC18.01c	YES_glucose_0.1percent_32C_10days	1.038	1.04	-0.036	-0.02	-0.016	0.723772	0.923027
SPCC126.13c	YES_glucose_0.1percent_32C_10days	1.093	1.084	0.063	0.037	0.025	0.978859	0.99356
SPBC405.02c	YES_glucose_0.1percent_32C_10days	1.051	1.046	0.069	0.038	0.031	0.672492	0.901638
SPAC11G7.03	YES_glucose_0.1percent_32C_10days	0.906	0.975	-0.287	-0.047	0.068	0.66654	0.90124
SPCC338.08	YES_glucose_0.1percent_32C_10days	0.841	0.822	-0.181	-0.129	-0.161	0.465729	0.844665
SPBC13G1.12	YES_glucose_0.1percent_32C_10days	0.939	0.899	0.108	-0.015	-0.076	0.678827	0.90537
SPAC15F9.01c	YES_glucose_0.1percent_32C_10days	1.049	1.046	0.023	0.006	0.002	0.00572546	0.578013
SPAC1142.06	YES_glucose_0.1percent_32C_10days	0.974	0.976	-0.061	-0.054	-0.051	0.255183	0.770111
SPBC428.05c	YES_glucose_0.1percent_32C_10days	0.914	0.884	0.123	-0.001	-0.047	0.898812	0.98039
SPCC569.04	YES_glucose_0.1percent_32C_10days	1.018	1.012	-0.067	-0.038	-0.046	0.0792795	0.699026
SPAC20G8.07c	YES_glucose_0.1percent_32C_10days	1.025	1.016	-0.049	-0.009	-0.022	0.358841	0.799256
SPCC1259.13	YES_glucose_0.1percent_32C_10days	0.967	0.956	-0.093	-0.06	-0.076	0.0312907	0.681601
SPCC16C4.20c	YES_glucose_0.1percent_32C_10days	1.17	1.159	0.36	0.261	0.249	0.325862	0.797006
SPAC3G6.04	YES_glucose_0.1percent_32C_10days	1.016	1.003	0.219	0.132	0.115	0.233113	0.768185
SPBC25B2.10	YES_glucose_0.1percent_32C_10days	1.018	1.011	-0.072	-0.032	-0.042	0.507019	0.854188
SPBC18H10.19	YES_glucose_0.1percent_32C_10days	1.049	1.057	0.057	0.035	0.046	0.368877	0.801541
SPBC577.06c	YES_glucose_0.1percent_32C_10days	1.048	1.042	-0.027	-0.004	-0.012	0.103782	0.719031
SPBC725.15	YES_glucose_0.1percent_32C_10days	0.826	0.861	-0.615	-0.221	-0.132	0.581295	0.872071
SPCC550.03c	YES_glucose_0.1percent_32C_10days	0.831	0.806	0.402	0.202	0.167	0.321759	0.794389
SPCC1739.05	YES_glucose_0.1percent_32C_10days	1.082	1.077	0.109	0.053	0.047	0.106657	0.722422
SPBC1734.05c	YES_glucose_0.1percent_32C_10days	0.96	0.956	-0.06	-0.05	-0.056	0.375285	0.801541
SPAC18G6.13	YES_glucose_0.1percent_32C_10days	1.018	1.009	0.117	0.073	0.061	0.740916	0.930699
SPAC1610.01	YES_glucose_0.1percent_32C_10days	0.931	0.924	-0.076	-0.034	-0.045	0.231104	0.768185
SPCC338.18	YES_glucose_0.1percent_32C_10days	1.053	1.056	0.012	0.002	0.007	0.132743	0.728628
SPACUNK4.07c	YES_glucose_0.1percent_32C_10days	1.066	1.066	0.058	0.012	0.012	0.937623	0.985379
SPAC56F8.14c	YES_glucose_0.1percent_32C_10days	1.005	0.994	-0.105	-0.068	-0.084	0.764953	0.934942
SPBC6B1.04	YES_glucose_0.1percent_32C_10days	0.975	0.963	-0.102	-0.021	-0.037	0.84996	0.963025
SPAC18B11.09c	YES_glucose_0.1percent_32C_10days	1.051	1.068	0.081	0.032	0.055	0.149911	0.738482
SPBC1347.13c	YES_glucose_0.1percent_32C_10days	1.079	1.09	0.068	0.05	0.065	0.0524978	0.681601
SPBC713.09	YES_glucose_0.1percent_32C_10days	1.008	1.012	0.032	0.014	0.019	0.26021	0.774747
SPBC2G2.07c	YES_glucose_0.1percent_32C_10days	0.371	0.338	-1.484	-1.3	-1.419	0.0135281	0.655279
SPAC3H1.03	YES_glucose_0.1percent_32C_10days	1.055	1.052	0.082	0.003	0.001	0.937596	0.985379
SPAC19D5.03	YES_glucose_0.1percent_32C_10days	1.048	1.036	0.079	0.036	0.02	0.776542	0.939217
SPCC285.10c	YES_glucose_0.1percent_32C_10days	0.973	0.977	-0.115	-0.097	-0.09	0.345889	0.798753
SPBC2D10.12	YES_glucose_0.1percent_32C_10days	0.858	0.855	-0.275	-0.159	-0.161	0.182752	0.749529
SPAC4A8.06c	YES_glucose_0.1percent_32C_10days	1.02	1.021	0.041	0.007	0.008	0.17762	0.747255
SPBC31A8.01c	YES_glucose_0.1percent_32C_10days	1.002	0.999	0.051	0.036	0.032	0.154087	0.738482
SPAC1F3.09	YES_glucose_0.1percent_32C_10days	1.01	1.006	-0.056	-0.036	-0.042	0.336204	0.798753
SPAPB1A10.14	YES_glucose_0.1percent_32C_10days	1.1	1.094	0.243	0.146	0.14	0.65393	0.897169
SPBC36B7.03	YES_glucose_0.1percent_32C_10days	1.083	1.064	0.12	0.068	0.044	0.377835	0.801541
SPBC8D2.12c	YES_glucose_0.1percent_32C_10days	0.957	0.95	0.171	0.106	0.095	0.0232738	0.662964
SPCC13B11.04c	YES_glucose_0.1percent_32C_10days	1.089	1.068	0.093	0.009	-0.017	0.461983	0.843112
SPBC1734.06	YES_glucose_0.1percent_32C_10days	0.97	0.988	-0.051	0.007	0.034	0.198175	0.759887
SPCC24B10.11c	YES_glucose_0.1percent_32C_10days	0.922	0.945	-0.179	-0.102	-0.066	0.0739187	0.693022
SPAPJ695.01c	YES_glucose_0.1percent_32C_10days	1.017	1.013	-0.068	-0.037	-0.042	0.326244	0.797006
SPBC8E4.02c	YES_glucose_0.1percent_32C_10days	1.054	1.05	-0.044	-0.016	-0.021	0.743895	0.932839
SPAC20G8.09c	YES_glucose_0.1percent_32C_10days	1.081	1.061	0.136	0.068	0.041	0.490758	0.851263
SPCC645.11c	YES_glucose_0.1percent_32C_10days	1.03	1.025	0.047	0.029	0.022	0.010661	0.643299
SPCC962.05	YES_glucose_0.1percent_32C_10days	1.048	1.057	0.067	0.021	0.035	0.265916	0.776814
SPCC2H8.05c	YES_glucose_0.1percent_32C_10days	1.125	1.108	0.254	0.106	0.089	0.751758	0.93412
SPAC13F5.01c	YES_glucose_0.1percent_32C_10days	0.971	0.99	-0.148	-0.056	-0.027	0.495909	0.852537
SPAC1002.07c	YES_glucose_0.1percent_32C_10days	1.07	1.067	0.061	0.027	0.024	0.0396548	0.681601
SPBC30D10.04	YES_glucose_0.1percent_32C_10days	0.921	0.913	0.134	0.07	0.058	0.641719	0.897169
SPAC1002.17c	YES_glucose_0.1percent_32C_10days	0.979	0.989	-0.165	-0.088	-0.072	0.342477	0.798753
SPAC2E1P3.04	YES_glucose_0.1percent_32C_10days	1.002	1.011	-0.112	-0.02	-0.005	0.356447	0.798753
SPAC1834.09	YES_glucose_0.1percent_32C_10days	1.037	1.038	0.026	0.016	0.018	0.253731	0.768476
SPAC20H4.11c	YES_glucose_0.1percent_32C_10days	1.069	1.079	0.057	0.014	0.028	0.465219	0.844193
SPAC1F5.07c	YES_glucose_0.1percent_32C_10days	0.895	0.912	-0.109	-0.041	-0.014	0.0496679	0.681601
SPAC25B8.01	YES_glucose_0.1percent_32C_10days	1.002	1.018	0.085	0.017	0.042	0.662048	0.899097
SPBC3H7.06c	YES_glucose_0.1percent_32C_10days	1.04	1.028	0.06	0.015	-0.001	0.898011	0.979833
SPAC5H10.01	YES_glucose_0.1percent_32C_10days	1.012	1.031	-0.089	-0.018	0.009	0.847146	0.963025
SPAC16E8.06c	YES_glucose_0.1percent_32C_10days	0.96	0.97	-0.069	-0.032	-0.017	0.0883508	0.699234
SPAC5D6.07c	YES_glucose_0.1percent_32C_10days	0.966	0.953	0.047	0.001	-0.018	0.576744	0.870601
SPAC4F10.08	YES_glucose_0.1percent_32C_10days	1.028	1.019	0.035	-0.002	-0.015	0.229387	0.767729
SPBC119.03	YES_glucose_0.1percent_32C_10days	1.064	1.063	-0.055	-0.006	-0.007	0.567154	0.870601
SPBC25D12.02c	YES_glucose_0.1percent_32C_10days	0.922	0.922	-0.14	-0.068	-0.066	0.622702	0.892454
SPAC18B11.03c	YES_glucose_0.1percent_32C_10days	0.989	0.993	-0.04	0.002	0.009	0.197621	0.759887
SPAC22F3.11c	YES_glucose_0.1percent_32C_10days	1.051	1.052	-0.013	0	0.001	0.785307	0.943551
SPCC1223.10c	YES_glucose_0.1percent_32C_10days	1.007	1.024	-0.055	-0.001	0.024	0.290281	0.7834
SPAC31A2.13c	YES_glucose_0.1percent_32C_10days	0.723	0.66	0.651	0.237	0.138	0.955046	0.988001
SPAC12B10.03	YES_glucose_0.1percent_32C_10days	1.07	1.057	-0.126	-0.034	-0.049	0.635739	0.897154
SPBC15C4.06c	YES_glucose_0.1percent_32C_10days	1.041	1.051	0.068	0.05	0.064	0.29497	0.786199
SPAC139.03	YES_glucose_0.1percent_32C_10days	1.015	1.01	0.052	0.013	0.006	0.275194	0.780928
SPCC622.15c	YES_glucose_0.1percent_32C_10days	0.979	0.969	-0.184	-0.137	-0.151	0.890672	0.977336
SPAC57A10.08c	YES_glucose_0.1percent_32C_10days	0.981	0.971	-0.059	-0.02	-0.035	0.237169	0.768185
SPAC23A1.16c	YES_glucose_0.1percent_32C_10days	1.04	1.05	-0.038	-0.008	0.005	0.885135	0.9761
SPAC16E8.01	YES_glucose_0.1percent_32C_10days	0.874	0.855	0.252	0.181	0.15	0.442202	0.833081
SPBC1703.12	YES_glucose_0.1percent_32C_10days	1.067	1.088	0.104	0.039	0.069	0.351895	0.798753
SPBC18H10.10c	YES_glucose_0.1percent_32C_10days	1.02	1.012	0.059	0.021	0.01	0.0502195	0.681601
SPBC21C3.20c	YES_glucose_0.1percent_32C_10days	0.876	0.929	0.213	0.113	0.205	0.848468	0.963025
SPBC3E7.06c	YES_glucose_0.1percent_32C_10days	1.065	1.058	0.063	0.013	0.004	0.589816	0.875905
SPAC1399.04c	YES_glucose_0.1percent_32C_10days	1.066	1.066	0.124	0.076	0.076	0.642577	0.897169
SPAC17C9.10	YES_glucose_0.1percent_32C_10days	1.047	1.049	0.088	0.035	0.038	0.827144	0.95627
SPCC1919.04	YES_glucose_0.1percent_32C_10days	0.986	0.99	-0.049	-0.022	-0.017	0.0262423	0.67649
SPAPB8E5.04c	YES_glucose_0.1percent_32C_10days	1.019	1.015	0.035	0.015	0.009	0.43008	0.831295
SPAC922.07c	YES_glucose_0.1percent_32C_10days	0.981	0.981	-0.035	-0.017	-0.018	0.529965	0.859602
SPAC18B11.11	YES_glucose_0.1percent_32C_10days	1.081	1.088	0.409	0.307	0.319	0.0599668	0.681601
SPAC11H11.05c	YES_glucose_0.1percent_32C_10days	1.014	1.036	-0.095	-0.028	0.003	0.874063	0.970837
SPBC800.12c	YES_glucose_0.1percent_32C_10days	1.026	1.031	-0.036	-0.008	0	0.682388	0.90654
SPBC16C6.03c	YES_glucose_0.1percent_32C_10days	0.886	0.88	-0.048	-0.022	-0.032	0.778284	0.940043
SPAC6G10.06	YES_glucose_0.1percent_32C_10days	1.006	0.996	0.051	0.013	-0.001	0.806355	0.949277
SPBC28F2.02	YES_glucose_0.1percent_32C_10days	1.111	1.119	0.155	0.1	0.111	0.0528376	0.681601
SPCC1183.06	YES_glucose_0.1percent_32C_10days	1.034	1.053	0.069	0.038	0.065	0.274464	0.780928
SPAC139.02c	YES_glucose_0.1percent_32C_10days	0.996	0.991	-0.141	-0.068	-0.073	0.385774	0.80655
SPBC685.04c	YES_glucose_0.1percent_32C_10days	1.013	1.021	-0.118	-0.025	-0.011	0.356011	0.798753
SPBC713.05	YES_glucose_0.1percent_32C_10days	0.989	1.011	-0.166	-0.066	-0.033	0.506887	0.854188
SPAC1952.08c	YES_glucose_0.1percent_32C_10days	1.006	1.02	-0.074	-0.01	0.011	0.56567	0.870601
SPCC1442.07c	YES_glucose_0.1percent_32C_10days	1.017	1.028	0.047	0.009	0.025	0.333292	0.797006
SPBC11C11.08	YES_glucose_0.1percent_32C_10days	1.019	1.026	0.071	0.022	0.032	0.482671	0.850954
SPAC19E9.02	YES_glucose_0.1percent_32C_10days	0.98	0.976	0.165	0.084	0.079	0.81724	0.953133
SPCC364.01	YES_glucose_0.1percent_32C_10days	1.006	0.996	0.029	-0.004	-0.019	0.566586	0.870601
SPCC737.09c	YES_glucose_0.1percent_32C_10days	0.995	1.011	-0.058	-0.003	0.021	0.534855	0.862208
SPAC23H3.06	YES_glucose_0.1percent_32C_10days	1.112	1.104	0.296	0.201	0.193	0.252602	0.768185
SPAC14C4.01c	YES_glucose_0.1percent_32C_10days	0.762	0.787	-0.693	-0.332	-0.26	0.74751	0.93412
SPCPB16A4.06c	YES_glucose_0.1percent_32C_10days	1	1.007	-0.102	-0.037	-0.026	0.55017	0.867991
SPAC222.12c	YES_glucose_0.1percent_32C_10days	0.112	0.112	-1.277	-1.277	-1.277	NaN	NaN
SPCC4F11.02	YES_glucose_0.1percent_32C_10days	0.885	0.851	-0.177	-0.079	-0.132	0.26532	0.776419
SPAC1142.01	YES_glucose_0.1percent_32C_10days	1.058	1.066	0.073	0.062	0.073	0.0245507	0.662964
SPAC4A8.02c	YES_glucose_0.1percent_32C_10days	1.087	1.098	0.114	0.041	0.057	0.467805	0.846691
SPAC140.02	YES_glucose_0.1percent_32C_10days	0.947	0.932	-0.079	-0.028	-0.049	0.741154	0.930699
SPBC27B12.08	YES_glucose_0.1percent_32C_10days	0.981	0.868	0.453	0.026	-0.117	0.980421	0.99356
SPBC2D10.11c	YES_glucose_0.1percent_32C_10days	1.028	1.01	-0.082	-0.038	-0.062	0.711018	0.920996
SPBC651.09c	YES_glucose_0.1percent_32C_10days	0.891	0.876	0.044	-0.009	-0.033	0.258735	0.773913
SPBC83.18c	YES_glucose_0.1percent_32C_10days	0.965	0.947	0.079	0.004	-0.023	0.913064	0.981486
SPAC144.11	YES_glucose_0.1percent_32C_10days	1.006	0.979	0.368	0.292	0.253	0.0239478	0.662964
SPAC869.02c	YES_glucose_0.1percent_32C_10days	1.063	1.08	0.069	0.039	0.062	0.641596	0.897169
SPCC1919.13c	YES_glucose_0.1percent_32C_10days	1.051	1.029	0.097	0.003	-0.026	0.947592	0.985523
SPAC6G10.10c	YES_glucose_0.1percent_32C_10days	1.101	1.102	0.072	0.046	0.047	0.806514	0.949277
SPAC16E8.17c	YES_glucose_0.1percent_32C_10days	0.857	0.867	-0.351	-0.298	-0.28	0.00505043	0.578013
SPAC3A11.11c	YES_glucose_0.1percent_32C_10days	1.003	0.991	-0.078	-0.04	-0.056	0.596877	0.880358
SPAC1783.04c	YES_glucose_0.1percent_32C_10days	0.939	0.924	-0.147	-0.018	-0.037	0.716282	0.920996
SPAC589.10c	YES_glucose_0.1percent_32C_10days	0.986	0.951	0.275	0.157	0.107	0.135517	0.728628
SPAPJ691.02	YES_glucose_0.1percent_32C_10days	1.052	1.046	0.082	0.032	0.024	0.872454	0.970837
SPAC1B1.02c	YES_glucose_0.1percent_32C_10days	1.072	1.052	0.14	0.058	0.032	0.936229	0.985379
SPBC13G1.04c	YES_glucose_0.1percent_32C_10days	1.029	1.008	0.153	0.027	0	0.621231	0.892454
SPAC2E1P5.02c	YES_glucose_0.1percent_32C_10days	1.069	1.054	0.143	0.035	0.017	0.896897	0.979388
SPBPB21E7.01c	YES_glucose_0.1percent_32C_10days	1.02	1.001	0.099	-0.008	-0.033	0.852296	0.963025
SPBC2G5.01	YES_glucose_0.1percent_32C_10days	1.057	1.054	0.103	0.051	0.048	0.251114	0.768185
SPBC6B1.10	YES_glucose_0.1percent_32C_10days	0.985	0.98	-0.065	-0.052	-0.059	0.0588355	0.681601
SPAC20H4.09	YES_glucose_0.1percent_32C_10days	0.96	0.963	-0.166	-0.096	-0.09	0.671933	0.901638
SPCC338.14	YES_glucose_0.1percent_32C_10days	1.023	1.03	-0.033	-0.005	0.005	0.0532459	0.681601
SPBC776.03	YES_glucose_0.1percent_32C_10days	0.819	0.802	-0.394	-0.284	-0.311	0.135568	0.728628
SPAC607.06c	YES_glucose_0.1percent_32C_10days	1.089	1.094	0.07	0.061	0.068	0.348352	0.798753
SPAC1F7.06	YES_glucose_0.1percent_32C_10days	1.116	1.109	0.088	0.053	0.044	0.51413	0.854188
SPBC1271.06c	YES_glucose_0.1percent_32C_10days	1.101	1.109	0.072	0.05	0.061	0.797783	0.947161
SPAC2F7.06c	YES_glucose_0.1percent_32C_10days	1.131	1.15	0.116	0.086	0.111	0.729174	0.92649
SPBC902.06	YES_glucose_0.1percent_32C_10days	0.983	0.978	0.081	0.065	0.058	0.26348	0.774836
SPBC29A10.05	YES_glucose_0.1percent_32C_10days	1.038	1.028	0.248	0.151	0.139	0.439837	0.833081
SPAC22A12.07c	YES_glucose_0.1percent_32C_10days	0.966	0.965	0.117	0.096	0.095	0.105133	0.719031
SPCC285.13c	YES_glucose_0.1percent_32C_10days	1.015	0.993	0.225	0.146	0.116	0.613693	0.889841
SPBC8E4.05c	YES_glucose_0.1percent_32C_10days	1.065	1.099	-0.126	-0.011	0.037	0.372463	0.801541
SPBC3B8.06	YES_glucose_0.1percent_32C_10days	1.068	1.089	0.092	0.029	0.058	0.825992	0.955749
SPCC663.06c	YES_glucose_0.1percent_32C_10days	1.029	1.042	-0.07	0.003	0.023	0.598038	0.880358
SPAC17C9.16c	YES_glucose_0.1percent_32C_10days	1.059	1.043	0.081	0.031	0.01	0.25182	0.768185
SPCC31H12.06	YES_glucose_0.1percent_32C_10days	1.056	1.076	0.078	0.024	0.053	0.285627	0.781205
SPAC1556.01c	YES_glucose_0.1percent_32C_10days	0.745	0.71	0.611	0.474	0.409	0.377579	0.801541
SPAC1071.09c	YES_glucose_0.1percent_32C_10days	0.963	0.955	-0.061	-0.043	-0.055	0.223565	0.763342
SPBC685.02	YES_glucose_0.1percent_32C_10days	1.04	1.041	-0.058	-0.009	-0.007	0.150289	0.738482
SPAC1002.18	YES_glucose_0.1percent_32C_10days	0.976	0.953	-0.076	-0.039	-0.073	0.545581	0.866846
SPCC1919.12c	YES_glucose_0.1percent_32C_10days	1.031	1.025	0.029	0.009	0	0.913081	0.981486
SPAC1952.12c	YES_glucose_0.1percent_32C_10days	1.097	1.094	0.152	0.095	0.091	0.318925	0.794389
SPCC1322.09	YES_glucose_0.1percent_32C_10days	1.057	1.058	0.064	0.053	0.055	0.393429	0.808007
SPAC21E11.03c	YES_glucose_0.1percent_32C_10days	1.018	0.993	-0.056	-0.021	-0.056	0.619296	0.892454
SPAC1952.15c	YES_glucose_0.1percent_32C_10days	0.998	0.997	-0.035	-0.028	-0.03	0.343918	0.798753
SPAC25B8.15c	YES_glucose_0.1percent_32C_10days	1.023	1.018	0.048	0.01	0.003	0.621284	0.892454
SPCC622.19	YES_glucose_0.1percent_32C_10days	1.002	0.978	-0.09	-0.034	-0.068	0.75858	0.934659
SPAC5H10.12c	YES_glucose_0.1percent_32C_10days	0.991	1.013	-0.115	-0.046	-0.013	0.60101	0.881287
SPCC4G3.08	YES_glucose_0.1percent_32C_10days	1.023	1.018	0.065	0.01	0.004	0.232336	0.768185
SPAC5H10.05c	YES_glucose_0.1percent_32C_10days	0.996	0.979	-0.064	-0.02	-0.044	0.463851	0.844189
SPBC1711.08	YES_glucose_0.1percent_32C_10days	1.102	1.138	0.18	0.116	0.165	0.134115	0.728628
SPBC1289.13c	YES_glucose_0.1percent_32C_10days	1.11	1.088	0.096	0.027	-0.001	0.436633	0.832421
SPAC18G6.01c	YES_glucose_0.1percent_32C_10days	0.99	1.007	-0.07	-0.014	0.011	0.832375	0.95866
SPAC2G11.15c	YES_glucose_0.1percent_32C_10days	1.089	1.077	0.103	0.051	0.036	0.18974	0.755607
SPCC126.15c	YES_glucose_0.1percent_32C_10days	0.87	0.844	-0.329	-0.169	-0.206	0.178385	0.747255
SPAC3G9.11c	YES_glucose_0.1percent_32C_10days	1.014	1.031	0.095	0.057	0.082	0.125233	0.728628
SPAC4G9.19	YES_glucose_0.1percent_32C_10days	0.98	0.981	-0.192	-0.118	-0.115	0.524088	0.855245
SPAC6G9.01c	YES_glucose_0.1percent_32C_10days	1.019	0.986	0.089	-0.012	-0.059	0.46212	0.843112
SPBC16C6.04	YES_glucose_0.1percent_32C_10days	1.007	0.994	0.1	0.055	0.036	0.916603	0.982195
SPAC13G6.03	YES_glucose_0.1percent_32C_10days	1.042	1.08	-0.093	0.024	0.078	1	1
SPBC4F6.10	YES_glucose_0.1percent_32C_10days	0.886	0.881	-0.277	-0.101	-0.103	0.346354	0.798753
SPCC663.11	YES_glucose_0.1percent_32C_10days	0.921	0.932	-0.084	-0.01	0.008	0.147105	0.738482
SPAC644.13c	YES_glucose_0.1percent_32C_10days	0.997	0.99	-0.032	-0.007	-0.017	0.0941477	0.70496
SPAC31G5.03	YES_glucose_0.1percent_32C_10days	0.732	0.732	0.96	0.861	0.864	0.192943	0.756356
SPAC17C9.14	YES_glucose_0.1percent_32C_10days	1.075	1.07	0.279	0.245	0.238	0.143523	0.738482
SPBC1706.03	YES_glucose_0.1percent_32C_10days	1.017	1.022	0.046	0.01	0.018	0.679778	0.905737
SPBC18H10.11c	YES_glucose_0.1percent_32C_10days	0.458	0.315	-1.47	-0.936	-1.32	0.335395	0.798753
SPBC8D2.11	YES_glucose_0.1percent_32C_10days	1.021	1.029	0.08	0.051	0.062	0.284491	0.781205
SPBC725.02	YES_glucose_0.1percent_32C_10days	0.747	0.753	0.249	0.209	0.221	0.9237	0.984739
SPAC186.03	YES_glucose_0.1percent_32C_10days	1.014	1.016	0.028	0.015	0.018	0.16612	0.742625
SPCC320.12	YES_glucose_0.1percent_32C_10days	0.994	1.01	-0.102	-0.034	-0.009	0.134911	0.728628
SPBC1347.11	YES_glucose_0.1percent_32C_10days	1.018	0.987	-0.099	-0.029	-0.071	0.99436	0.996945
SPBC1604.16c	YES_glucose_0.1percent_32C_10days	0.942	0.944	-0.069	-0.053	-0.05	0.705791	0.919544
SPAC19A8.08	YES_glucose_0.1percent_32C_10days	1.17	1.148	0.105	0.04	0.013	0.108473	0.722422
SPAC1687.07	YES_glucose_0.1percent_32C_10days	1.016	1.019	-0.048	-0.017	-0.013	0.851175	0.963025
SPCC24B10.16c	YES_glucose_0.1percent_32C_10days	0.889	0.881	-0.085	-0.048	-0.06	0.673848	0.901638
SPBC16C6.09	YES_glucose_0.1percent_32C_10days	0.675	0.706	-0.447	-0.018	0.08	0.498694	0.852537
SPBC1289.11	YES_glucose_0.1percent_32C_10days	0.919	0.909	-0.166	-0.047	-0.059	0.510483	0.854188
SPBC28F2.05c	YES_glucose_0.1percent_32C_10days	1.017	1.012	-0.056	-0.023	-0.029	0.939277	0.985379
SPCC285.17	YES_glucose_0.1percent_32C_10days	1.06	1.065	0.147	0.061	0.07	0.14358	0.738482
SPCC830.04c	YES_glucose_0.1percent_32C_10days	1.039	1.019	0.092	0.002	-0.024	0.913079	0.981486
SPBC839.13c	YES_glucose_0.1percent_32C_10days	0.928	0.915	0.19	0.142	0.122	0.516509	0.854284
SPCC1494.01	YES_glucose_0.1percent_32C_10days	1.065	1.052	0.121	0.016	0.001	0.319452	0.794389
SPAC23G3.04	YES_glucose_0.1percent_32C_10days	1.065	1.037	0.18	0.073	0.037	0.830042	0.958309
SPCC1442.11c	YES_glucose_0.1percent_32C_10days	1.047	1.029	0.081	0.002	-0.022	0.566912	0.870601
SPCC16C4.10	YES_glucose_0.1percent_32C_10days	0.888	0.898	0.164	0.045	0.064	0.310211	0.792756
SPCC4G3.02	YES_glucose_0.1percent_32C_10days	0.991	0.998	-0.111	-0.033	-0.022	0.496885	0.852537
SPAC25H1.09	YES_glucose_0.1percent_32C_10days	1.07	1.05	0.128	0.059	0.032	0.643577	0.897169
SPAC16C9.01c	YES_glucose_0.1percent_32C_10days	1.051	1.061	0.036	0.015	0.029	0.233996	0.768185
SPBC1289.01c	YES_glucose_0.1percent_32C_10days	0.93	0.921	-0.038	-0.025	-0.038	0.537485	0.862684
SPAC10F6.17c	YES_glucose_0.1percent_32C_10days	0.97	0.953	-0.118	-0.09	-0.115	0.109227	0.722422
SPAC227.04	YES_glucose_0.1percent_32C_10days	0.992	0.989	-0.072	-0.064	-0.068	0.215508	0.760257
SPCC1739.14	YES_glucose_0.1percent_32C_10days	0.924	0.897	0.194	0.021	-0.016	0.707237	0.920007
SPAC15A10.15	YES_glucose_0.1percent_32C_10days	1.067	1.097	0.09	0.037	0.078	0.493839	0.852447
SPAC4C5.02c	YES_glucose_0.1percent_32C_10days	0.794	0.944	1.236	0.768	1.123	0.206897	0.760257
SPAC17G6.06	YES_glucose_0.1percent_32C_10days	0.944	0.954	0.22	0.185	0.201	0.358064	0.799195
SPBC83.03c	YES_glucose_0.1percent_32C_10days	0.922	0.908	0.333	0.206	0.188	0.5608	0.870601
SPCC1020.01c	YES_glucose_0.1percent_32C_10days	0.975	0.971	0.037	0	-0.006	0.720442	0.922445
SPBC839.05c	YES_glucose_0.1percent_32C_10days	0.853	0.829	0.991	0.874	0.835	0.0293	0.681601
SPAC18B11.04	YES_glucose_0.1percent_32C_10days	1.097	1.094	-0.079	-0.041	-0.045	0.323399	0.79537
SPAC13F5.05	YES_glucose_0.1percent_32C_10days	1.023	1.018	-0.046	-0.037	-0.045	0.403442	0.812681
SPCC24B10.12	YES_glucose_0.1percent_32C_10days	0.901	0.892	-0.149	-0.085	-0.098	0.100384	0.716696
SPAC10F6.12c	YES_glucose_0.1percent_32C_10days	0.935	0.921	-0.101	-0.066	-0.087	0.11331	0.726089
SPCC584.11c	YES_glucose_0.1percent_32C_10days	0.648	0.653	0.877	0.862	0.873	0.277817	0.780928
SPAC17G8.14c	YES_glucose_0.1percent_32C_10days	1.032	1.015	-0.08	-0.031	-0.054	0.525383	0.855245
SPAC19A8.14	YES_glucose_0.1percent_32C_10days	1.089	1.072	0.071	0.023	0.001	0.239264	0.768185
SPAC5H10.02c	YES_glucose_0.1percent_32C_10days	1.01	1.002	-0.088	-0.062	-0.073	0.0477512	0.681601
SPAC2G11.09	YES_glucose_0.1percent_32C_10days	1.005	0.994	-0.073	-0.057	-0.073	0.0821665	0.699234
SPBC146.02	YES_glucose_0.1percent_32C_10days	1.011	1.009	0.01	0.002	-0.001	0.653345	0.897169
SPAC1F5.05c	YES_glucose_0.1percent_32C_10days	1.012	1	0.378	0.313	0.296	0.373808	0.801541
SPCC757.12	YES_glucose_0.1percent_32C_10days	1.022	1.007	-0.06	-0.036	-0.058	0.429805	0.831295
SPBC2G5.03	YES_glucose_0.1percent_32C_10days	1.123	1.147	0.302	0.245	0.277	0.290407	0.7834
SPAC23H3.14	YES_glucose_0.1percent_32C_10days	1.065	1.092	-0.092	-0.006	0.032	0.826021	0.955749
SPAC227.15	YES_glucose_0.1percent_32C_10days	1.054	1.052	0.042	0.035	0.033	0.151338	0.738482
SPCC663.09c	YES_glucose_0.1percent_32C_10days	1.052	1.049	0.053	0.001	-0.003	0.381021	0.804325
SPCC1322.16	YES_glucose_0.1percent_32C_10days	1.131	1.143	0.134	0.116	0.131	0.41418	0.821315
SPCC16A11.10c	YES_glucose_0.1percent_32C_10days	0.895	0.871	-0.115	-0.047	-0.085	0.123935	0.728628
SPBC32F12.11	YES_glucose_0.1percent_32C_10days	0.816	0.747	-0.389	-0.197	-0.307	0.303406	0.788544
SPAC2H10.02c	YES_glucose_0.1percent_32C_10days	1.022	1.014	-0.039	-0.022	-0.033	0.973632	0.992921
SPBC1271.08c	YES_glucose_0.1percent_32C_10days	1.077	1.083	0.104	0.048	0.057	0.961951	0.990399
SPAC1805.04	YES_glucose_0.1percent_32C_10days	0.99	0.993	0.13	0.124	0.127	0.782029	0.94251
SPBC947.01	YES_glucose_0.1percent_32C_10days	1.084	1.093	0.132	0.099	0.111	0.260423	0.774747
SPBC29A10.11c	YES_glucose_0.1percent_32C_10days	1.045	1.091	-0.182	-0.021	0.045	0.887075	0.9761
SPAC3C7.10	YES_glucose_0.1percent_32C_10days	1.081	1.064	0.263	0.169	0.149	0.0888408	0.699234
SPCC306.05c	YES_glucose_0.1percent_32C_10days	0.946	0.963	-0.152	-0.064	-0.037	0.249919	0.768185
SPBC530.04	YES_glucose_0.1percent_32C_10days	0.998	0.995	0.048	0.027	0.023	0.504098	0.854188
SPBPB10D8.02c	YES_glucose_0.1percent_32C_10days	1.049	1.046	0.051	-0.001	-0.004	0.250506	0.768185
SPBC19G7.08c	YES_glucose_0.1percent_32C_10days	1.052	1.047	0.145	0.068	0.062	0.125128	0.728628
SPCC663.10	YES_glucose_0.1percent_32C_10days	1.112	1.121	0.169	0.149	0.16	0.195192	0.75921
SPAC30C2.08	YES_glucose_0.1percent_32C_10days	1.055	1.056	0.07	0.021	0.023	0.491352	0.851263
SPCC550.08	YES_glucose_0.1percent_32C_10days	1.085	1.09	0.063	0.049	0.056	0.733297	0.926775
SPBC1711.13	YES_glucose_0.1percent_32C_10days	0.867	0.833	-0.293	-0.156	-0.207	0.130049	0.728628
SPAC1142.05	YES_glucose_0.1percent_32C_10days	1.029	1.011	0.09	0.034	0.008	0.785446	0.943551
SPBC725.04	YES_glucose_0.1percent_32C_10days	0.98	0.989	0.132	0.063	0.077	0.199083	0.759887
SPAC1039.02	YES_glucose_0.1percent_32C_10days	1.039	1.047	0.15	0.046	0.06	0.741023	0.930699
SPAC22G7.01c	YES_glucose_0.1percent_32C_10days	1.008	1.026	0.122	0.02	0.048	0.916144	0.982195
SPAC19D5.02c	YES_glucose_0.1percent_32C_10days	1.031	0.981	0.231	0.075	0.008	0.665838	0.90124
[truncated: 448,844+ more rows]

## Sheet: Discretized all conditions
gene_id	YES_glucose_0.1percent_32C_10days	YES_glucose_0.1percent_32C	YES_glucose_0.5percent_32C_10days	YES_glucose_0.5percent_32C	YES_18	YES_glucose_1percent_32C_10days	YES_glucose_1percent_32C	YES_37	YES_glucose_3percent_32C_10days	YES_EGTA_10mM_5days	YES_EGTA_1mM	YES_bortezomib_125uM	YES_tea_tree_0.25ulml	YES_tea_tree_0.5ulml	YES_CdCl2_0.5mM	YES_HU_10mM	YES_TSA_500nM	YES_VPA_8mM	YES_tunicamycin_1ulin100ml	YES_KCl_0.5M_SDS_0.04percent	YES_KCl_0.5M	YES_KCl_1M_SDS_0.04percent	YES_KCl_1M	YES_LiCl_2mM_SDS_0.04percent	YES_LiCl_4mM_SDS_0.04percent	YES_LiCl_4mM	YES_MgCl2_100mM	YES_NaCl_100mM_SDS_0.04percent	YES_NaCl_100mM	YES_NaCl_200mM	YES_SDS_0.04percent	EMM_3AT	EMM_DIP	EMM_Glutamate	YES_H2O2_1mM	YES_formamide_2.5percent	YES_CoCl_0.45mM	YES_EDTA_0.3mM	YES_glycerol	YES_MMS_0.005percent	YES_NaOrthovanadate_1mM	YES_TBH_1mM	YES_cycloheximide_0.01ugml	YES_H2O2_0.5mM	YES_NaOrthovanadate_0.5mM	YES_25	YES_glucose_0.1percent_25C	YES_glucose_0.5percent_25C	YES_glucose_1percent_25C
SPBC29A3.09c	0	0	0	0	0	0	0	0	0	-1	0	0	0	0	-1	0	0	1	1	-1	0	NA	0	-1	0	-1	0	0	0	-1	0	1	0	0	0	0	0	0	0	0	-1	1	1	1	1	0	0	0	1
SPAPB2B4.06	0	0	0	0	0	0	0	0	0	1	0	0	0	0	0	0	0	1	0	1	0	1	0	0	-1	-1	0	0	0	0	0	0	0	0	0	0	0	0	0	0	0	1	0	0	0	0	0	0	0
SPAC4H3.03c	0	0	0	0	0	0	0	0	0	0	0	0	0	0	-1	0	0	0	0	0	0	0	0	0	0	0	0	0	0	0	0	0	0	0	0	0	0	0	0	0	0	0	0	0	1	-1	-1	0	0
SPBC1539.10	0	0	0	0	-1	1	0	0	1	-1	0	0	0	0	0	-1	0	0	0	0	-1	-1	0	0	1	-1	-1	0	0	1	0	0	-1	0	0	-1	0	0	0	-1	-1	0	0	0	-1	0	-1	0	0
SPAC977.17	0	0	0	0	0	0	0	0	0	1	0	0	0	0	0	0	0	0	0	0	0	0	0	0	-1	0	0	0	0	0	0	0	0	0	0	0	0	0	0	0	0	0	0	0	1	0	0	0	0
SPBC337.03	0	0	0	0	0	0	0	-1	0	1	0	0	0	0	1	-1	0	0	-1	0	0	1	0	0	0	0	0	0	0	0	0	-1	-1	-1	0	-1	0	0	0	0	-1	-1	-1	0	1	1	0	0	0
SPBC1711.15c	0	0	0	0	0	0	0	0	0	1	0	0	0	0	-1	0	0	0	0	1	0	-1	0	0	0	0	0	0	0	0	0	0	0	0	0	0	0	0	0	0	0	0	1	0	1	0	0	0	0
SPBC15D4.10c	1	1	0	0	0	0	0	0	1	1	0	0	0	0	1	-1	0	0	0	-1	0	0	0	0	-1	0	-1	0	0	0	0	0	0	0	0	-1	0	0	0	-1	0	-1	0	0	0	0	0	0	1
SPBC3H7.13	1	0	0	0	0	0	0	0	0	0	0	0	0	-1	-1	0	0	-1	0	-1	-1	0	0	0	0	0	-1	0	0	0	0	-1	0	0	0	0	0	0	0	0	0	0	0	0	1	0	0	0	0
SPBC29A10.12	0	0	0	0	0	0	0	0	0	1	0	0	0	0	1	0	0	0	0	1	0	1	0	0	1	0	0	0	0	0	0	0	0	0	0	0	0	0	0	0	0	0	0	0	0	0	0	0	0
SPBC23G7.04c	-1	0	0	0	-1	0	0	0	0	1	0	0	0	0	0	-1	0	-1	0	-1	0	0	0	0	0	0	-1	0	0	0	0	-1	-1	-1	0	-1	0	-1	0	-1	-1	-1	-1	0	-1	0	0	0	0
SPBC557.04	0	0	0	0	0	0	0	0	0	1	0	0	0	0	-1	0	0	0	0	-1	0	1	0	0	0	0	0	0	0	0	0	0	0	0	0	0	0	0	0	0	1	0	0	0	0	0	0	1	0
SPBC365.06	0	0	0	0	-1	0	0	0	0	0	0	0	0	0	0	-1	0	-1	0	-1	-1	-1	0	0	1	0	-1	0	0	0	0	-1	-1	0	-1	-1	0	-1	-1	-1	-1	-1	-1	0	-1	0	0	0	0
SPBC3E7.08c	0	0	0	0	0	0	0	0	0	1	0	0	0	0	0	0	0	0	0	1	0	1	0	0	0	0	0	0	0	0	0	0	0	0	0	0	0	0	0	-1	0	0	0	0	0	0	0	0	0
SPBC8D2.02c	0	0	0	0	1	0	0	0	0	0	0	0	0	0	1	0	0	0	0	-1	0	-1	-1	0	-1	0	0	0	0	0	0	0	0	0	0	0	0	0	0	0	-1	-1	0	0	0	0	0	0	0
SPBP8B7.18c	0	1	0	0	1	0	0	0	0	1	0	0	0	0	-1	-1	0	0	0	-1	-1	-1	0	0	0	0	-1	0	1	0	0	0	-1	0	-1	-1	0	-1	0	-1	-1	-1	-1	0	-1	0	0	0	0
SPBC902.02c	0	1	0	0	0	0	0	0	0	1	0	0	0	0	0	-1	0	0	0	1	0	0	0	0	-1	0	0	0	0	0	0	0	0	0	0	0	0	0	0	0	0	1	0	0	1	0	0	0	0
SPBPB8B6.04c	0	0	0	0	1	0	0	0	0	1	0	0	0	0	0	1	0	0	0	1	0	0	0	0	0	0	0	0	0	0	0	0	0	0	0	0	0	0	0	1	0	0	0	0	1	0	0	0	0
SPCC18B5.07c	0	1	0	1	-1	0	0	0	0	0	0	0	0	1	1	0	0	1	1	1	0	-1	0	1	0	0	0	0	0	0	1	1	1	0	0	-1	0	0	0	0	0	-1	-1	0	0	0	1	1	0
SPBP4H10.16c	1	0	1	0	0	1	0	0	0	1	0	0	0	0	1	0	0	0	0	0	0	1	0	0	0	0	0	0	0	0	0	0	0	0	0	0	0	0	0	0	0	0	0	0	0	0	0	0	0
SPCC576.01c	0	0	1	0	0	1	0	0	1	1	0	0	0	0	0	0	0	0	0	1	0	1	0	0	-1	0	0	0	-1	-1	0	0	1	0	0	0	0	0	0	0	0	0	0	-1	0	0	0	0	0
SPCC970.02	0	0	1	1	1	1	0	0	1	1	0	0	0	0	1	1	0	0	0	1	0	1	1	0	0	0	1	0	0	0	0	0	1	0	0	-1	0	0	0	0	1	0	0	1	-1	0	1	1	1
SPAC22F3.06c	-1	-1	0	-1	-1	-1	0	0	0	1	0	-1	0	0	-1	1	0	1	0	0	0	1	0	0	1	0	-1	0	0	0	0	0	0	-1	0	0	0	0	-1	0	0	1	0	0	0	0	0	-1	0
SPBC23G7.12c	0	0	0	0	0	0	0	0	0	0	0	0	-1	0	-1	1	0	0	0	1	0	1	0	0	1	0	0	0	0	0	0	0	0	0	0	0	0	0	0	0	0	1	0	0	0	0	0	0	0
SPCC126.01c	0	0	0	0	0	0	0	0	0	-1	0	0	0	0	0	0	0	0	0	0	0	0	0	0	-1	0	0	0	0	0	0	0	1	0	0	0	0	0	0	0	0	0	0	0	0	0	0	0	0
SPAC23A1.04c	0	0	0	0	0	0	0	0	0	-1	0	0	0	0	0	0	0	0	0	0	0	-1	0	0	0	0	0	0	0	0	0	0	0	0	0	0	0	0	0	0	0	0	0	1	0	0	0	0	0
SPBC32H8.02c	0	0	0	0	0	0	0	0	0	1	0	0	0	0	1	0	0	0	0	-1	-1	-1	-1	0	1	0	0	0	0	0	0	0	0	0	0	0	0	0	0	0	0	0	0	0	0	0	0	0	0
SPBC725.11c	0	0	0	0	0	0	0	0	0	1	0	0	0	0	1	1	0	0	0	0	0	1	0	0	0	0	0	-1	0	-1	0	0	0	0	0	0	0	0	0	0	1	0	0	0	1	0	0	0	0
SPAC24B11.08c	0	0	0	0	0	0	0	0	0	-1	0	0	0	0	0	0	0	0	0	1	0	1	0	0	-1	0	0	0	0	0	0	0	0	0	0	0	0	0	0	0	0	0	-1	0	0	0	0	0	0
SPBC582.10c	0	0	0	0	0	0	0	0	0	-1	0	0	0	0	0	0	0	0	0	1	0	1	0	0	0	0	0	0	0	0	0	0	0	0	0	0	0	0	0	0	0	0	0	0	0	0	0	0	0
SPAC13F5.03c	0	0	0	0	0	0	0	0	0	1	0	0	0	0	-1	0	0	0	0	0	0	0	0	0	-1	0	0	0	0	0	0	0	0	0	0	0	0	0	0	0	0	-1	0	0	0	0	0	0	0
SPAC26H5.02c	0	0	0	0	0	0	0	0	0	0	0	0	0	0	0	0	0	0	0	0	0	1	0	0	1	0	0	0	0	0	0	0	0	0	0	0	0	0	0	0	0	0	-1	0	0	0	1	0	0
SPBP8B7.10c	1	1	0	1	-1	0	1	0	0	-1	0	0	0	0	1	0	0	1	0	1	0	-1	0	0	1	0	0	0	0	1	0	1	0	0	0	0	0	0	0	0	1	0	0	1	1	-1	1	0	0
SPBC29B5.01	-1	0	0	1	1	0	1	-1	-1	-1	-1	0	-1	-1	-1	-1	1	-1	-1	-1	-1	-1	-1	-1	-1	-1	-1	-1	0	0	-1	-1	-1	-1	1	-1	0	1	1	1	-1	-1	-1	1	1	0	1	-1	0
SPAC1D4.02c	0	0	0	0	0	0	0	0	0	1	0	0	0	0	0	0	0	0	0	1	0	1	0	0	1	0	0	0	0	0	0	0	0	0	0	0	0	0	0	0	0	0	0	0	0	0	1	0	0
SPAC2F3.15	-1	-1	0	0	0	0	0	0	0	1	0	0	0	0	1	1	0	0	-1	-1	0	1	1	-1	-1	-1	0	-1	0	-1	0	1	0	-1	0	-1	0	0	0	0	-1	0	-1	0	0	0	0	0	0
SPCC1442.17c	0	0	0	0	1	0	0	0	0	1	0	0	0	0	0	0	0	0	0	1	0	1	0	0	0	0	0	0	0	0	0	0	0	0	0	0	0	0	0	0	1	0	0	0	0	0	0	0	0
SPAC1687.15	0	0	0	0	0	0	0	0	0	1	0	0	0	0	1	0	0	0	0	-1	0	0	-1	0	1	0	0	0	0	0	0	1	0	0	0	0	0	0	0	0	0	1	0	0	0	0	0	0	0
SPAC27F1.08	0	0	0	0	0	0	0	0	0	-1	0	0	0	0	-1	-1	0	-1	0	0	0	-1	-1	0	1	0	0	0	0	0	0	0	0	0	0	0	0	-1	0	0	0	0	0	-1	-1	0	0	0	0
SPAC30D11.13	-1	0	0	0	0	0	0	0	0	1	0	0	0	0	-1	-1	0	-1	0	-1	-1	-1	-1	0	1	0	-1	0	0	0	0	-1	-1	0	-1	-1	0	-1	0	-1	-1	-1	-1	0	-1	0	-1	-1	0
SPCC18B5.01c	0	0	0	0	0	0	0	0	0	-1	0	-1	0	0	-1	0	0	0	0	1	0	0	0	0	0	0	0	0	0	0	0	0	0	0	0	0	0	0	0	0	0	1	0	0	0	0	0	0	0
SPCC18B5.11c	0	0	0	0	0	0	0	0	0	0	0	0	0	0	0	-1	0	0	0	1	0	1	0	0	0	0	0	0	0	0	0	0	0	0	0	0	0	0	0	-1	0	0	0	0	0	0	0	0	0
SPAC5D6.09c	0	0	0	0	0	0	0	0	0	1	0	0	0	0	-1	0	0	0	0	0	0	-1	0	0	-1	0	0	0	0	0	0	0	0	0	0	0	0	0	0	0	0	0	0	0	0	0	0	0	0
SPAC3A11.10c	0	0	0	0	0	0	0	0	0	0	0	0	0	0	-1	0	0	0	0	0	0	-1	0	0	0	0	0	0	0	0	0	0	0	0	0	0	0	0	0	0	0	0	0	0	0	0	0	0	0
SPCPB16A4.03c	0	0	0	0	0	0	0	0	0	-1	0	0	0	1	0	-1	0	-1	0	-1	-1	-1	-1	0	0	0	-1	0	1	1	0	0	-1	0	0	-1	0	-1	0	-1	-1	-1	0	0	-1	-1	-1	-1	0
SPBC1198.14c	0	0	0	0	0	0	0	0	0	0	0	0	0	0	1	0	0	0	0	1	0	1	0	0	0	0	0	0	0	0	0	0	0	0	0	0	0	0	0	0	0	0	0	0	0	0	0	0	0
SPAP27G11.02	0	0	0	0	0	0	0	0	0	-1	0	0	0	0	0	0	0	0	0	0	1	1	0	0	0	0	0	0	0	0	0	-1	0	0	0	0	0	0	0	0	0	0	1	-1	0	0	0	0	0
SPAC3G9.08	0	0	0	0	-1	0	0	-1	0	-1	-1	0	0	0	-1	-1	0	-1	0	-1	0	0	0	0	1	0	-1	0	0	0	0	0	-1	0	0	-1	0	-1	0	-1	-1	-1	0	0	-1	0	-1	-1	0
SPAC13G7.05	0	0	0	0	0	0	0	0	0	1	0	0	0	0	-1	0	0	0	0	1	1	1	0	0	1	0	0	0	0	0	0	0	0	0	0	0	0	0	0	0	0	-1	0	0	0	0	0	0	0
SPBC106.10	1	1	1	1	-1	1	1	0	0	-1	0	-1	0	0	1	1	0	1	0	-1	-1	-1	-1	0	1	0	0	-1	-1	0	0	-1	0	-1	0	1	0	0	1	-1	-1	-1	0	-1	0	0	1	1	1
SPBC1685.07c	1	0	1	1	0	1	0	0	1	1	0	0	0	0	1	0	0	0	0	1	0	1	0	0	1	0	0	0	0	0	0	0	1	-1	0	0	0	0	0	0	0	0	0	0	0	0	1	1	0
SPCC1183.04c	0	-1	0	0	0	0	-1	0	0	1	0	0	0	0	-1	0	0	0	-1	1	-1	NA	0	-1	-1	-1	0	0	0	-1	0	0	0	0	0	0	0	0	0	0	0	1	0	0	0	1	0	1	1
SPAC1142.02c	0	0	0	0	0	0	0	0	0	-1	0	0	0	0	1	0	0	0	0	1	0	1	0	0	0	0	0	0	0	0	0	0	0	0	0	0	0	0	0	0	0	0	0	0	0	1	0	0	0
SPCC1322.08	0	0	1	0	0	0	0	0	0	-1	0	0	-1	0	0	0	0	0	0	0	0	NA	-1	0	1	0	0	0	0	0	0	0	0	0	1	0	0	0	0	0	1	1	0	0	1	0	0	0	0
SPAC12G12.01c	0	0	0	0	0	0	0	0	0	-1	0	0	0	0	-1	0	0	0	0	1	0	1	0	0	0	0	0	0	0	0	0	0	1	0	0	0	0	0	0	0	1	0	0	1	0	-1	0	0	0
SPAC16E8.14c	0	0	0	0	0	0	0	0	0	-1	0	0	0	0	0	0	0	0	0	1	0	1	0	0	1	0	0	0	0	0	0	0	0	0	0	0	0	0	0	0	0	0	0	1	0	0	0	0	0
SPAC17D4.01	0	0	0	0	0	0	0	0	0	0	0	0	0	0	-1	0	0	0	0	1	0	1	0	0	-1	0	1	0	0	0	0	0	0	0	0	0	0	0	0	0	0	0	0	0	1	0	0	0	0
SPCC330.02	0	0	0	0	0	0	0	0	0	1	0	0	0	0	-1	0	0	0	0	-1	-1	-1	0	0	1	0	-1	0	0	0	0	0	0	0	0	-1	0	0	0	-1	-1	-1	0	0	0	0	0	0	0
SPAC1556.03	0	-1	0	0	1	0	0	0	0	-1	0	0	0	0	1	0	0	0	0	1	0	1	0	0	1	0	0	0	0	0	0	0	1	0	0	0	0	0	0	0	1	0	1	0	0	0	0	0	0
SPAC20H4.04	0	0	0	0	0	0	0	0	0	1	0	0	0	0	0	0	0	0	0	-1	0	1	0	0	1	0	0	0	0	0	0	0	0	0	0	0	0	0	0	0	0	0	0	0	0	0	1	0	0
SPAC22H10.02	0	0	0	0	0	0	0	0	0	1	0	0	0	0	0	0	0	0	0	1	0	1	0	0	-1	0	1	0	0	0	0	0	0	0	0	0	0	0	0	0	0	0	0	0	0	0	0	0	0
SPCC663.04	1	1	-1	1	0	1	0	-1	1	-1	-1	0	0	0	1	0	1	1	0	-1	-1	NA	-1	-1	NA	-1	-1	-1	-1	-1	-1	1	1	0	-1	-1	-1	0	1	-1	-1	-1	-1	-1	-1	1	1	1	1
SPAC27D7.11c	0	0	0	0	0	0	0	0	0	1	0	0	0	0	1	0	0	0	0	0	0	1	0	0	1	0	0	0	0	0	0	0	0	0	0	0	0	0	0	0	1	0	0	1	0	0	0	0	0
SPAC29A4.17c	0	0	0	0	0	0	0	0	0	1	0	0	0	0	0	0	0	0	0	1	0	0	0	0	0	0	0	0	0	0	0	0	0	0	0	0	0	0	0	0	0	0	0	0	0	0	0	0	0
SPCP1E11.02	0	0	0	0	0	0	0	0	0	-1	0	0	0	0	0	0	0	0	0	-1	0	-1	-1	0	-1	-1	0	-1	0	0	0	0	0	0	0	-1	0	0	0	0	0	-1	0	0	0	1	1	0	0
SPAC17A5.01	1	0	1	0	-1	0	0	0	0	-1	0	0	0	0	-1	0	0	0	0	1	0	1	1	0	-1	0	0	0	0	0	0	0	1	1	0	1	0	0	0	0	0	0	0	0	-1	0	0	0	0
SPAC4F10.16c	0	0	0	0	0	0	0	0	0	1	0	0	0	0	1	0	0	0	0	0	0	1	0	0	0	0	0	0	0	0	0	0	0	0	0	0	0	0	0	0	0	-1	0	0	0	0	1	0	0
SPAC57A10.14	0	0	0	0	0	0	0	0	0	-1	0	-1	0	1	1	0	0	0	-1	-1	0	-1	-1	0	1	0	-1	0	0	0	0	1	1	0	0	0	0	0	0	-1	-1	-1	-1	0	-1	-1	0	0	0
SPAC13G7.02c	0	0	0	0	0	0	0	0	0	-1	0	0	0	0	0	0	0	0	0	-1	0	-1	0	0	0	0	0	0	0	0	0	0	0	0	0	0	0	0	0	0	0	0	0	0	0	0	0	0	0
SPAC1805.09c	-1	-1	-1	-1	0	0	0	0	0	0	0	0	0	0	0	0	0	0	0	0	0	-1	0	0	0	0	0	0	0	0	0	0	0	0	0	0	0	0	-1	0	1	0	0	0	0	-1	-1	-1	-1
SPAC821.09	1	1	1	1	1	0	0	0	0	1	1	0	0	0	1	0	1	1	1	-1	-1	-1	0	0	0	0	1	-1	0	-1	0	0	1	1	1	1	1	0	1	0	0	-1	1	-1	1	1	0	0	0
SPAC6G9.09c	1	1	1	1	0	1	1	0	1	1	0	-1	0	1	1	0	0	0	0	-1	1	0	-1	0	-1	-1	0	0	0	0	0	1	0	0	0	-1	0	0	1	0	-1	-1	0	-1	0	-1	1	0	-1
SPAC1952.09c	-1	-1	-1	0	0	-1	0	0	-1	0	0	0	0	0	0	0	0	0	-1	-1	0	0	0	0	-1	0	-1	0	0	0	0	0	0	-1	0	0	0	0	0	0	1	1	0	0	0	0	-1	-1	0
SPAC19B12.04	0	0	0	0	0	0	0	0	0	0	-1	0	0	0	1	0	0	0	0	-1	0	0	1	0	1	0	-1	0	1	1	0	0	0	0	-1	-1	-1	-1	0	-1	-1	-1	-1	0	-1	0	-1	0	-1
SPBC1271.09	0	0	0	0	0	0	0	0	0	0	0	0	0	0	-1	0	0	0	-1	1	0	0	0	0	0	0	0	0	0	0	0	-1	0	0	0	0	0	0	0	0	0	0	0	0	0	0	-1	0	0
SPAC27E2.09	1	1	0	0	0	0	0	-1	0	0	-1	0	0	0	-1	0	0	0	-1	1	0	0	0	0	1	0	0	0	0	0	0	-1	0	0	0	0	0	0	0	0	1	-1	0	0	0	0	0	0	1
SPAC1F8.01	0	0	0	0	0	0	0	0	0	1	0	0	0	0	1	0	0	0	0	1	0	1	0	0	1	0	0	0	0	0	0	0	0	0	0	0	0	0	0	0	0	1	0	0	0	0	0	0	0
SPBC1709.13c	0	1	1	0	0	0	0	0	0	1	0	0	0	0	1	0	0	0	0	1	0	1	0	0	0	0	0	0	0	0	0	0	0	-1	0	0	0	0	0	0	0	0	0	0	0	0	1	0	1
SPBP4H10.20	0	0	0	0	0	0	0	0	0	1	0	0	0	0	1	0	0	0	0	0	0	0	0	0	0	0	0	0	0	-1	0	1	0	1	0	0	0	0	0	0	1	1	0	0	0	0	0	0	0
SPAC513.02	0	0	0	0	0	0	0	0	0	0	0	0	0	0	0	0	0	0	0	-1	0	0	0	0	0	0	0	0	0	0	0	0	0	0	0	0	0	0	0	0	0	0	0	0	1	0	0	0	0
SPAC23D3.12	0	0	0	0	0	0	0	0	0	1	0	0	0	0	1	0	0	0	0	0	0	0	0	0	1	0	0	0	0	0	0	0	0	0	0	0	0	0	0	0	0	0	0	0	0	0	0	0	0
SPBC146.04	0	0	0	0	0	0	0	0	0	-1	0	0	0	0	0	0	0	0	0	0	0	0	0	0	1	0	1	0	0	0	0	0	0	0	0	0	0	0	0	0	-1	0	-1	0	0	0	0	0	0
SPAC5H10.11	0	0	0	0	0	0	0	0	0	0	0	0	0	0	-1	0	0	0	0	1	0	0	0	0	0	0	0	0	0	0	0	0	0	0	0	0	0	0	0	0	0	0	0	0	0	0	0	0	0
SPAC31G5.12c	0	0	0	0	0	0	0	0	0	-1	0	0	0	0	0	0	0	0	0	0	0	1	0	0	0	0	0	0	0	0	0	0	0	0	0	0	0	0	0	0	0	0	0	0	0	0	0	0	0
SPAC6B12.04c	0	0	0	0	0	0	0	0	0	-1	0	0	0	0	0	0	0	0	0	0	0	0	0	0	0	0	0	0	0	0	0	0	0	0	0	0	0	0	0	0	1	0	-1	0	0	0	0	0	0
SPAC458.04c	0	0	0	0	0	0	0	0	0	-1	0	0	0	0	0	0	0	0	0	0	0	0	0	0	0	0	0	0	0	0	0	0	0	0	0	0	0	0	0	0	0	0	0	0	0	0	0	0	0
SPBC1703.14c	0	0	0	0	0	0	0	0	0	-1	0	0	0	0	1	-1	0	-1	0	0	0	1	0	0	1	0	1	0	0	0	0	0	0	0	0	-1	0	0	0	0	1	-1	0	0	0	0	1	0	0
SPAC821.07c	0	0	0	0	0	0	0	0	0	1	0	0	0	0	-1	0	0	0	0	-1	0	0	0	0	-1	0	0	-1	0	0	0	-1	0	-1	0	0	0	1	0	0	-1	-1	0	0	0	1	0	0	0
SPAPB1A10.12c	0	1	0	0	0	0	0	0	0	1	0	0	0	0	0	0	0	0	0	1	0	0	-1	0	0	0	0	0	0	0	0	0	0	0	0	0	0	0	0	0	0	0	0	0	-1	0	0	0	0
SPBC17A3.06	0	0	0	0	0	0	0	0	0	0	0	0	0	0	1	-1	0	0	0	-1	0	-1	-1	0	1	0	-1	0	1	0	0	0	-1	-1	-1	-1	0	-1	0	0	-1	-1	0	1	-1	0	0	0	0
SPAC8C9.12c	0	0	0	0	0	0	0	0	0	1	0	0	0	0	-1	-1	0	0	0	-1	0	-1	-1	0	0	-1	0	0	0	-1	0	-1	-1	-1	0	0	0	0	0	0	1	-1	0	-1	0	0	0	0	0
SPBC16E9.12c	0	0	1	0	-1	0	0	0	0	1	0	0	0	-1	1	-1	0	0	0	1	0	-1	1	0	0	0	0	-1	0	0	0	0	1	1	1	0	1	0	1	0	1	1	1	1	1	-1	0	-1	-1
SPBC19F5.01c	0	0	0	0	0	0	0	0	0	0	0	0	0	0	0	0	0	0	0	0	0	0	1	0	0	0	0	0	0	0	0	0	1	0	0	0	0	0	0	0	0	0	0	0	0	0	0	0	0
SPAC9G1.05	0	0	0	0	0	0	0	0	0	1	0	0	0	0	0	-1	1	1	1	1	0	-1	0	0	-1	0	-1	0	0	0	0	0	0	0	0	0	0	0	0	-1	-1	0	0	-1	0	0	0	0	0
SPBC3B9.09	0	0	0	0	0	0	0	0	0	-1	0	0	0	0	0	0	0	-1	-1	-1	0	-1	-1	-1	-1	0	0	-1	0	0	0	1	0	0	0	0	0	0	0	0	-1	-1	1	-1	-1	0	0	0	0
SPBC21B10.03c	-1	0	0	0	0	0	0	0	0	-1	-1	0	0	0	1	0	0	-1	0	-1	0	0	0	0	1	0	-1	0	0	0	0	0	1	0	0	-1	0	0	0	-1	-1	-1	0	-1	-1	-1	0	0	0
SPBC543.03c	0	0	0	0	0	0	0	0	0	-1	-1	0	0	0	-1	-1	0	0	-1	-1	0	-1	-1	-1	-1	-1	0	-1	-1	0	0	1	1	1	0	0	0	0	1	0	1	1	1	-1	0	0	0	-1	0
SPBC25B2.04c	-1	-1	-1	-1	-1	0	0	0	0	1	0	0	0	0	1	0	0	-1	0	-1	-1	-1	-1	-1	0	0	0	-1	0	0	0	0	0	0	0	-1	0	0	-1	0	0	-1	0	-1	0	0	-1	-1	0
SPBC29A3.13	0	-1	0	0	0	0	0	0	0	-1	0	-1	0	0	1	0	0	0	0	1	0	NA	0	0	-1	0	1	0	0	0	0	0	0	0	0	0	0	0	0	-1	0	1	0	0	0	0	0	0	0
SPAC589.02c	1	1	1	1	-1	0	1	1	0	-1	0	0	1	1	-1	-1	-1	0	-1	1	1	-1	1	1	-1	0	-1	0	1	1	1	1	1	1	-1	-1	0	-1	0	0	0	-1	-1	-1	-1	0	1	0	-1
SPBC31F10.12	1	1	1	1	-1	1	0	0	0	1	0	-1	-1	0	1	-1	0	0	0	1	0	-1	0	0	-1	0	1	0	0	0	0	1	1	1	0	1	0	0	1	0	-1	0	0	0	0	0	1	0	0
SPBC15D4.02	-1	0	0	0	0	0	0	0	0	0	0	1	0	0	0	-1	0	-1	0	-1	0	0	0	0	1	0	0	0	0	0	0	0	0	0	0	-1	0	0	-1	0	-1	0	0	0	-1	-1	0	-1	0
SPAC9G1.06c	0	0	0	0	0	0	0	0	0	-1	0	0	0	0	-1	0	0	-1	0	-1	0	-1	0	0	0	0	0	-1	0	0	0	-1	-1	0	0	0	0	-1	0	0	0	0	0	-1	0	0	0	0	1
SPBC337.04	0	1	0	0	0	0	0	0	0	0	0	0	0	0	0	0	0	0	0	-1	0	0	0	0	-1	0	0	0	0	0	0	0	0	-1	0	0	0	0	0	0	1	-1	0	0	0	1	0	0	0
SPBC18E5.14c	-1	0	0	0	0	0	0	0	0	1	0	0	0	0	0	-1	0	-1	0	-1	-1	-1	-1	0	1	0	-1	0	0	0	0	0	0	-1	-1	-1	0	-1	-1	-1	-1	-1	0	0	-1	0	-1	0	0
SPBC4.05	0	0	0	0	0	0	0	0	0	1	0	0	0	0	0	0	0	0	0	0	0	1	0	0	0	0	0	0	0	0	0	-1	0	0	0	0	0	0	0	0	0	0	0	0	0	0	0	0	0
SPBC23G7.13c	-1	0	0	0	0	0	0	0	0	1	0	0	0	0	-1	-1	0	-1	0	-1	0	0	0	0	-1	0	0	0	0	0	0	-1	-1	-1	0	-1	0	0	0	0	0	-1	0	0	-1	0	-1	0	0
SPBC56F2.03	0	0	0	0	0	0	0	0	0	1	0	0	0	0	-1	0	0	0	0	0	0	0	0	0	-1	0	0	0	0	0	0	0	0	0	0	0	0	0	0	0	0	1	0	0	0	0	0	0	0
SPBC3B9.05	0	0	0	0	0	0	0	0	0	1	0	0	0	0	0	1	0	0	0	1	0	1	0	0	-1	0	-1	0	0	0	0	0	0	0	0	0	0	0	0	0	0	0	0	0	0	0	1	0	0
SPBC3E7.12c	0	0	0	0	0	0	0	0	0	1	0	0	0	0	0	0	0	0	0	-1	0	0	0	0	0	0	0	0	0	0	0	0	0	0	0	0	0	0	0	0	0	0	0	1	0	0	0	0	0
SPBC6B1.02	0	0	0	0	0	0	0	0	0	1	0	1	0	0	0	0	0	0	0	0	0	1	0	0	0	0	0	0	0	0	0	0	-1	-1	0	0	0	0	0	0	0	0	0	0	0	0	0	0	0
SPBC947.14c	0	0	0	0	0	0	0	0	0	0	0	0	0	0	0	0	0	0	0	1	0	0	0	0	0	0	0	0	0	0	0	0	0	0	0	0	0	0	0	0	0	0	1	0	0	0	0	0	0
SPBPB10D8.01	0	0	0	0	0	0	0	0	0	1	0	0	0	0	-1	0	0	0	0	-1	0	0	0	0	-1	0	0	0	0	0	0	-1	-1	-1	0	0	0	0	0	0	0	0	0	0	0	0	0	0	0
SPBC9B6.03	0	0	0	0	0	0	0	0	0	1	0	-1	0	0	0	1	0	0	0	1	0	0	0	0	0	-1	-1	0	0	0	0	0	0	-1	0	0	0	0	0	0	1	-1	0	0	0	1	0	0	0
SPBPB8B6.05c	0	0	0	0	0	0	0	0	0	0	0	0	0	0	1	0	0	0	0	1	0	0	0	0	0	0	0	0	0	0	0	0	0	0	0	0	0	0	0	0	0	0	0	1	0	0	0	0	0
SPCC191.11	0	0	0	0	0	0	0	0	0	1	0	0	0	0	0	0	0	0	0	0	0	0	0	0	0	0	0	0	0	0	0	0	0	0	0	0	0	0	0	0	0	1	0	0	0	0	0	0	0
SPBP8B7.06	1	1	0	0	0	0	-1	0	0	-1	-1	1	0	0	-1	0	0	0	-1	-1	0	-1	-1	-1	1	0	1	0	0	0	0	0	0	0	1	1	1	1	1	0	1	1	0	-1	1	1	-1	-1	-1
SPCC74.05	0	1	0	1	-1	1	1	0	0	0	-1	-1	0	0	-1	-1	0	0	1	-1	1	1	1	0	1	1	-1	1	1	1	0	1	1	1	-1	-1	0	-1	0	-1	-1	-1	0	0	-1	-1	0	0	0
SPCP1E11.05c	0	0	0	0	0	0	0	0	0	-1	0	0	0	0	-1	-1	0	0	0	1	0	0	-1	0	0	0	-1	0	0	-1	0	1	0	0	0	0	0	0	0	1	-1	0	1	1	0	0	0	0	0
SPAC22F3.08c	-1	0	0	0	0	0	0	1	0	-1	0	0	0	0	0	-1	0	-1	0	-1	0	0	0	0	1	0	-1	0	1	0	0	0	0	0	0	-1	0	-1	0	-1	-1	-1	-1	0	1	-1	0	0	-1
SPBC24C6.04	0	-1	-1	0	0	0	0	1	0	0	0	0	0	0	1	0	0	-1	0	0	-1	1	0	0	0	-1	0	0	0	0	0	0	0	0	0	-1	0	0	0	0	0	0	0	0	0	0	0	0	-1
SPCC1393.09c	0	0	0	0	0	0	0	0	0	1	0	0	0	0	1	0	0	0	0	0	0	1	0	0	1	0	0	0	0	0	0	0	0	0	0	0	0	0	0	0	0	0	1	0	0	0	0	0	0
SPAC23A1.07	1	1	1	0	-1	0	0	0	0	-1	0	0	0	1	-1	-1	0	-1	0	0	0	0	0	0	-1	0	0	0	0	0	0	0	0	0	0	1	0	0	0	0	-1	-1	-1	0	0	0	0	0	0
SPBC337.11	0	0	0	0	0	0	0	0	0	-1	0	0	0	0	1	0	0	0	0	1	0	1	1	0	0	0	0	0	0	0	0	0	0	0	0	0	0	0	0	0	1	0	0	0	0	0	0	0	0
SPAC24B11.12c	0	0	0	0	0	0	0	0	0	1	0	0	0	-1	-1	0	0	-1	0	-1	-1	-1	-1	0	1	-1	0	-1	0	-1	0	-1	0	0	0	0	0	0	0	0	1	-1	0	0	0	0	0	0	0
SPBC646.08c	0	0	0	0	0	0	0	0	0	-1	0	0	0	0	0	0	0	0	0	-1	0	-1	0	0	-1	0	0	0	0	0	0	0	0	0	0	0	0	0	0	0	0	0	0	0	0	0	0	0	0
SPAC14C4.12c	0	0	0	0	0	0	0	0	0	-1	0	0	0	0	1	0	0	0	0	1	0	0	-1	0	-1	-1	-1	0	0	0	0	1	0	1	0	0	0	0	0	0	1	-1	1	0	0	-1	0	-1	0
SPAC27D7.02c	0	0	0	0	0	0	0	0	0	1	0	0	0	0	-1	0	0	0	0	-1	0	0	0	0	-1	0	0	0	0	0	0	0	0	0	0	0	0	0	0	0	0	0	0	0	0	0	0	0	1
SPBPB7E8.01	0	0	0	0	0	0	0	0	0	0	0	0	0	0	1	1	0	1	1	1	0	1	0	0	0	0	0	0	0	0	0	-1	0	0	0	-1	0	-1	0	0	0	-1	0	0	0	0	0	0	1
SPAC1D4.03c	0	0	0	0	1	0	0	0	0	1	0	0	0	0	-1	0	0	-1	0	-1	0	0	-1	0	0	0	0	0	0	0	0	0	0	1	0	0	0	0	0	0	-1	0	1	-1	0	0	0	0	0
SPAC2F3.16	0	0	0	0	0	0	0	0	0	1	0	0	0	0	0	0	0	0	0	1	0	1	0	0	-1	0	0	0	0	0	0	0	0	-1	0	0	0	0	0	0	0	1	0	0	0	0	0	0	0
SPCC1450.02	0	0	0	0	0	0	0	0	0	1	0	-1	0	0	1	0	0	0	0	-1	0	1	0	0	1	0	-1	0	0	0	0	1	0	-1	0	-1	0	0	0	0	0	0	0	0	-1	0	0	0	0
SPAC29B12.05c	0	0	0	0	0	0	0	0	0	0	0	0	0	0	1	0	0	0	0	0	0	1	0	0	0	0	0	0	0	0	0	0	0	0	0	0	0	0	0	0	0	0	0	0	0	0	0	0	0
SPAC31A2.16	0	0	0	0	0	0	0	-1	0	0	0	0	0	0	1	0	0	0	0	-1	0	0	0	0	0	0	0	0	0	0	0	0	0	0	0	0	0	0	0	0	1	0	0	0	0	0	0	1	1
SPCC18B5.03	0	0	0	0	0	0	0	0	0	-1	0	-1	0	0	0	0	0	0	0	1	0	1	0	0	-1	0	0	0	0	0	0	0	0	0	0	0	0	0	0	0	0	1	0	0	0	0	0	0	0
SPAC5H10.09c	0	0	0	0	0	0	0	0	0	0	0	0	0	0	0	0	0	0	0	1	0	1	0	0	1	0	0	0	0	0	0	0	0	0	0	0	0	0	0	0	0	0	0	0	0	0	0	0	0
SPAC3A12.03c	0	0	0	0	0	0	0	0	0	0	0	0	0	0	0	0	0	0	0	1	0	1	0	0	0	0	0	0	0	0	0	-1	-1	-1	0	0	0	0	0	0	0	0	0	0	0	1	0	0	0
SPCPB1C11.02	0	0	0	0	0	0	0	0	0	0	0	0	0	0	0	0	0	1	0	1	0	1	0	0	1	0	1	0	0	0	0	0	0	0	0	0	0	0	0	0	0	0	0	0	0	0	0	0	0
SPAP27G11.14c	-1	-1	0	0	0	0	0	0	1	1	0	0	0	0	0	-1	0	-1	0	-1	-1	1	0	-1	1	0	-1	0	1	0	0	0	1	0	0	-1	0	0	-1	-1	-1	-1	0	0	-1	0	0	0	-1
SPAC3H1.05	0	0	0	0	0	0	0	0	0	-1	0	0	0	0	0	1	0	1	0	-1	0	1	0	0	-1	-1	1	0	0	0	0	-1	-1	-1	0	0	0	0	0	0	-1	0	-1	0	0	0	1	0	0
SPAC13G7.13c	0	1	0	0	0	0	0	0	0	-1	0	0	0	0	-1	0	0	0	0	1	0	0	0	0	1	0	0	0	0	0	0	0	0	0	0	0	0	0	0	0	0	0	0	0	0	0	0	0	0
SPBC16A3.14	0	0	0	0	0	0	0	0	0	0	0	0	0	0	0	0	0	0	0	0	0	1	0	0	1	0	0	0	0	0	0	0	0	0	0	0	0	0	0	0	0	0	0	1	0	0	0	0	0
SPAC1002.20	0	0	0	0	0	0	0	0	0	1	0	0	0	0	1	0	0	0	0	1	0	0	0	0	0	0	0	0	0	0	0	0	0	0	0	0	0	0	0	0	0	0	0	0	1	0	0	0	0
SPCC11E10.07c	-1	0	-1	0	0	-1	0	0	0	-1	0	0	0	0	-1	-1	0	0	-1	1	0	0	0	0	1	0	-1	0	0	0	0	0	0	-1	0	0	0	0	0	0	1	0	0	0	-1	0	0	0	0
SPAC11D3.07c	0	0	0	0	0	0	0	0	0	0	0	0	0	0	0	0	0	0	-1	1	0	1	0	0	0	0	-1	0	0	0	0	0	0	1	0	0	0	0	0	0	1	0	0	0	0	0	0	0	0
SPAC11D3.09	0	0	0	0	0	0	0	0	0	1	0	0	0	0	1	0	0	0	0	0	0	1	0	0	0	0	0	0	0	0	0	0	0	0	0	0	0	0	0	0	0	1	0	1	1	0	0	0	0
SPAC1527.02	0	0	0	0	0	0	0	0	0	1	0	0	0	0	0	-1	0	-1	0	-1	-1	-1	-1	0	1	0	-1	0	0	0	0	-1	-1	0	0	-1	0	0	0	0	-1	-1	0	0	-1	0	-1	0	1
SPCC1442.14c	0	0	0	0	0	0	0	0	0	-1	0	0	0	0	0	0	0	0	0	0	0	0	1	0	-1	-1	-1	0	0	0	0	1	1	0	0	0	0	0	0	0	1	0	0	0	1	0	0	0	1
SPAC12G12.07c	0	0	0	0	1	0	0	0	0	-1	0	0	0	0	-1	0	0	0	0	1	0	0	0	0	1	0	1	0	0	0	0	0	0	0	0	0	0	0	0	0	0	0	1	0	0	0	0	0	0
SPAC17G8.09	0	0	0	0	0	0	0	0	0	1	0	0	0	0	-1	0	0	0	0	0	0	0	0	0	-1	0	0	0	0	0	0	-1	0	0	0	0	0	0	0	0	0	0	0	0	0	1	0	0	0
SPCC330.07c	0	0	0	0	0	0	0	0	0	0	0	0	0	0	1	0	0	0	0	-1	0	0	0	0	1	0	0	0	0	0	0	0	0	-1	0	0	0	0	0	0	0	0	0	0	0	0	0	0	0
SPAC1565.07c	0	0	0	0	0	0	0	0	0	1	0	0	0	0	1	0	0	1	0	0	0	1	0	0	0	0	0	0	0	0	0	1	1	0	0	0	0	0	0	0	0	0	0	-1	-1	-1	0	0	0
SPAC222.07c	0	0	0	0	0	0	0	0	0	0	0	0	0	0	1	0	0	0	0	-1	0	0	0	0	0	0	0	0	0	0	0	0	-1	-1	0	0	0	0	0	0	0	1	0	0	0	0	0	0	0
SPAC23A1.03	0	0	0	0	0	0	0	0	0	-1	0	0	0	0	1	0	0	0	0	1	0	0	0	0	0	0	0	0	0	0	0	0	0	0	0	0	0	0	0	0	0	0	0	0	0	0	0	0	0
SPCC70.06	0	0	0	0	0	0	0	0	0	1	0	0	0	0	-1	0	0	0	0	-1	0	1	0	0	-1	0	0	0	0	0	0	0	0	-1	0	0	0	0	0	0	0	0	0	0	0	0	0	0	0
SPAC16A10.02	0	0	0	0	0	0	0	0	0	-1	0	0	0	0	0	0	0	0	0	1	0	0	0	0	1	0	0	0	0	1	0	0	0	1	0	0	0	0	0	0	0	0	0	0	0	0	0	0	0
SPAC29B12.10c	0	0	0	0	0	0	0	0	0	-1	0	0	0	0	-1	0	0	0	0	-1	0	1	0	0	0	0	1	0	0	0	0	-1	0	0	0	0	0	0	0	0	0	0	0	-1	0	0	0	0	0
SPAC2C4.05	0	1	0	0	0	0	0	0	1	-1	0	0	0	0	0	-1	0	-1	0	-1	0	1	1	0	1	0	0	0	0	0	0	-1	-1	0	0	-1	0	0	0	0	-1	-1	0	0	-1	-1	0	0	0
SPCP1E11.10	0	0	0	0	0	0	0	0	0	1	0	0	0	0	-1	-1	0	-1	0	-1	-1	-1	-1	0	1	-1	-1	0	0	0	0	-1	-1	0	0	-1	0	-1	0	0	-1	0	-1	0	-1	0	0	0	0
SPAC17A5.11	0	0	0	0	0	0	0	0	0	1	0	0	0	0	1	1	0	0	0	1	0	0	1	0	0	0	0	0	0	0	0	0	0	0	0	0	0	0	0	0	1	1	0	0	0	0	0	0	0
SPAC4G8.13c	0	1	0	1	-1	0	0	0	-1	-1	-1	0	1	1	-1	-1	0	0	-1	-1	-1	NA	-1	1	-1	-1	-1	-1	1	-1	0	1	1	0	1	-1	-1	0	-1	-1	-1	0	-1	0	-1	-1	0	-1	-1
SPAC589.11	0	0	0	0	0	0	0	0	0	1	0	0	0	0	1	0	0	0	0	1	0	0	0	0	-1	0	0	0	0	0	0	0	0	0	0	0	0	0	0	0	0	0	0	0	0	0	0	0	0
SPAC1420.01c	0	0	0	0	0	0	0	0	0	-1	0	0	0	0	0	0	0	0	0	0	0	0	0	0	1	0	0	0	0	0	0	0	-1	-1	0	0	0	0	0	0	0	0	0	-1	0	0	0	0	0
SPAC1805.12c	1	0	0	0	0	0	0	0	0	-1	0	0	0	0	1	1	0	1	0	1	0	1	0	0	0	0	0	0	0	0	0	0	0	0	0	0	0	0	0	0	1	0	1	0	1	-1	1	1	0
SPAC8F11.08c	0	0	0	0	0	0	0	0	0	1	1	-1	0	0	1	0	0	-1	0	-1	0	1	0	0	1	0	0	0	0	0	0	0	0	0	0	-1	0	0	0	0	0	-1	0	0	-1	0	0	0	0
SPAC750.08c	0	0	0	0	0	0	0	0	0	0	0	0	0	0	0	0	0	0	0	1	0	0	0	0	0	0	0	0	0	0	0	0	0	0	0	0	0	0	0	0	0	0	0	0	0	0	0	0	0
SPAC19A8.05c	0	0	0	0	0	0	0	0	0	-1	0	0	0	0	-1	0	0	-1	-1	-1	0	0	-1	0	0	0	0	-1	0	0	0	0	0	0	0	0	0	0	0	0	-1	0	0	-1	-1	0	0	0	0
SPAC19B12.07c	0	0	0	0	0	0	0	0	0	0	0	0	0	0	0	0	0	0	0	1	0	1	0	0	1	0	0	0	0	0	0	0	0	0	0	0	0	0	0	0	0	0	0	0	0	0	0	0	0
SPBC1271.14	0	0	0	0	0	0	0	0	0	1	0	0	0	0	0	0	0	0	0	0	0	-1	0	0	0	0	0	0	0	0	0	1	1	-1	0	0	0	0	0	0	0	0	0	1	0	1	0	0	0
SPAPB17E12.03	1	1	1	0	-1	0	0	0	0	-1	0	0	0	0	-1	0	0	-1	0	0	0	0	0	0	-1	0	0	0	0	0	0	0	0	0	0	0	0	0	0	0	-1	0	0	-1	0	0	0	0	-1
SPAC29A4.11	0	0	0	0	0	0	0	0	0	1	0	0	0	0	0	0	0	0	0	1	0	0	0	0	1	0	0	0	0	0	0	0	0	-1	0	0	0	0	0	0	1	0	0	0	0	0	0	0	0
SPAC20G8.08c	0	0	0	0	0	0	0	0	0	1	0	0	0	0	0	0	0	0	0	1	0	0	0	0	1	0	0	0	0	0	0	0	0	0	0	0	0	0	0	0	0	0	0	0	0	1	0	0	0
SPBC1711.05	-1	-1	-1	0	-1	0	0	0	0	-1	0	0	0	0	0	-1	0	-1	0	-1	-1	-1	-1	0	1	0	-1	0	0	0	0	0	-1	0	0	-1	0	-1	-1	-1	-1	-1	-1	0	-1	0	-1	0	0
SPAC4F10.02	0	0	0	0	0	0	0	0	0	1	0	0	0	0	0	0	0	0	0	0	0	0	0	0	1	0	0	0	0	0	0	0	0	0	0	0	0	0	0	0	0	0	0	0	1	0	0	0	0
SPAC17H9.19c	0	0	0	0	0	0	0	1	0	0	0	0	0	0	-1	-1	0	-1	-1	-1	-1	-1	-1	0	0	0	-1	0	0	0	0	1	0	0	0	-1	0	-1	0	0	-1	0	0	0	-1	-1	-1	0	0
SPBC1215.01	-1	-1	-1	-1	0	0	0	0	0	1	0	0	0	0	1	0	0	0	0	0	0	0	0	0	1	0	0	0	0	0	0	0	0	1	0	0	0	0	-1	0	1	0	0	1	0	0	-1	-1	0
SPAC521.02	0	0	0	1	0	0	0	0	0	1	0	1	0	0	0	0	0	0	0	1	0	NA	0	0	1	0	1	0	0	0	0	0	0	0	0	0	0	0	0	0	0	1	0	0	1	1	0	1	1
SPAC23H4.08	0	0	0	0	1	0	0	0	0	1	0	0	0	0	1	0	0	0	0	1	0	1	1	0	-1	0	1	0	0	0	0	0	0	-1	0	0	0	0	0	1	1	-1	0	0	1	0	0	0	0
SPAC630.09c	0	0	0	0	0	0	0	0	0	1	0	0	0	0	1	0	0	0	0	-1	0	0	0	0	0	0	0	0	0	0	0	0	0	0	0	0	0	0	0	0	0	1	0	0	0	0	0	0	0
SPAC323.05c	0	0	0	0	0	0	0	0	0	-1	0	0	0	0	0	-1	0	0	0	-1	0	-1	0	0	1	0	-1	0	0	0	0	-1	0	-1	0	-1	0	-1	0	0	-1	-1	0	0	-1	0	0	0	0
SPBC16D10.08c	0	0	0	0	0	0	0	0	0	-1	0	0	0	0	0	1	0	0	0	0	0	0	0	0	0	0	0	0	0	0	0	0	0	0	0	0	0	0	0	1	0	0	0	0	0	0	0	0	0
SPAC6B12.07c	0	0	0	0	0	0	0	0	0	-1	0	0	0	0	-1	0	0	0	0	-1	0	-1	-1	0	-1	0	0	-1	0	-1	0	-1	0	0	0	0	0	0	0	0	-1	0	-1	0	-1	0	0	0	1
SPAC57A7.08	0	0	0	0	0	0	0	0	0	-1	0	0	0	0	0	0	0	-1	0	-1	-1	-1	-1	1	1	1	0	0	0	1	0	1	1	1	0	0	0	0	0	0	0	-1	1	0	0	0	0	0	1
SPAC823.03	0	0	0	0	0	0	0	0	0	-1	0	0	0	0	1	0	0	0	0	-1	0	1	0	0	0	0	0	0	0	0	0	0	0	0	0	0	0	0	0	0	0	1	-1	0	1	0	0	0	0
SPBC17A3.10	1	1	0	0	-1	0	0	0	0	-1	0	0	0	0	-1	0	0	0	0	1	0	0	0	0	-1	0	0	0	0	0	0	0	0	1	0	1	0	0	0	0	-1	1	0	0	0	0	0	0	0
SPAC8E11.02c	1	1	1	1	1	1	1	0	1	1	1	1	1	1	1	-1	1	0	1	-1	-1	-1	-1	-1	-1	-1	-1	-1	1	0	-1	-1	-1	0	0	-1	0	1	1	0	-1	-1	-1	0	1	0	1	0	1
SPBC16E9.17c	0	0	0	0	0	0	0	0	0	1	0	0	0	0	0	0	0	0	0	0	0	0	0	0	0	0	0	0	0	0	0	0	0	0	0	0	0	0	0	0	0	1	0	0	0	0	0	0	0
SPBC19F8.04c	0	0	0	0	0	0	0	0	0	0	0	0	0	0	0	0	0	0	0	1	0	0	0	0	0	0	0	0	0	0	0	0	0	0	0	0	0	0	0	0	0	1	0	0	0	0	0	0	0
SPAC9G1.10c	0	0	0	0	0	0	0	0	0	1	0	0	0	0	-1	-1	0	0	0	1	0	0	0	0	-1	0	0	-1	0	0	0	0	0	0	0	0	0	0	0	0	0	0	0	0	0	0	0	0	0
SPBC4.06	0	0	0	0	0	0	0	0	0	-1	0	0	0	0	0	0	0	0	0	1	0	0	0	0	-1	0	0	0	0	0	0	1	0	0	0	0	0	0	0	0	0	1	1	0	0	0	0	0	0
SPBC106.02c	0	0	0	0	0	0	0	0	0	0	0	0	0	0	0	0	0	0	0	0	0	1	0	0	0	0	0	0	0	0	0	0	0	0	-1	0	0	0	0	0	0	-1	0	-1	0	0	0	0	0
SPBC56F2.06	0	0	0	0	0	0	0	0	0	0	0	0	0	0	-1	0	0	0	-1	0	0	-1	0	0	-1	0	0	0	0	0	0	1	1	0	0	0	0	0	0	0	-1	0	0	0	0	0	0	0	0
SPBC25D12.06	0	-1	1	-1	-1	1	0	0	1	1	-1	0	-1	-1	1	-1	1	0	0	-1	0	-1	-1	0	1	0	-1	1	0	1	0	1	1	1	0	-1	1	0	0	0	0	-1	0	-1	1	0	-1	-1	0
SPBC29A3.18	0	0	0	0	0	0	0	0	0	1	0	0	0	0	0	0	0	-1	0	0	0	0	0	-1	1	0	-1	-1	0	0	-1	1	1	0	0	0	0	0	0	0	1	0	0	1	0	0	0	0	0
SPAPB8E5.02c	0	0	0	0	1	0	0	0	0	-1	0	0	0	0	0	0	0	0	0	1	0	1	0	0	0	0	0	0	0	0	0	0	0	0	0	0	0	0	0	0	0	0	0	0	0	1	0	0	0
SPAC630.13c	1	1	1	1	0	1	0	0	0	1	0	1	0	0	1	0	0	0	0	1	0	1	0	0	0	0	0	0	0	0	0	1	0	-1	0	0	0	1	1	1	1	0	1	0	1	0	1	1	0
SPBC31F10.16	0	0	0	0	0	0	0	0	0	-1	0	0	0	0	-1	0	0	-1	0	-1	-1	-1	-1	0	-1	0	0	-1	0	0	0	0	0	0	0	0	0	0	0	0	1	0	-1	0	0	0	0	0	1
SPBC15D4.06	0	0	0	0	-1	0	0	0	0	1	0	0	0	0	1	0	0	1	0	-1	0	-1	-1	0	1	0	1	0	0	0	0	1	0	0	0	0	0	0	0	0	1	0	0	0	0	0	-1	0	0
SPAPB1E7.05	0	0	0	0	0	0	0	0	0	1	0	0	0	0	0	0	0	0	0	-1	0	1	0	0	0	0	0	0	0	0	0	-1	0	-1	0	0	0	0	0	0	0	0	0	0	0	0	0	0	0
SPBC342.05	0	0	0	0	0	0	0	0	0	1	0	0	0	0	0	-1	0	0	0	0	0	1	0	0	0	0	0	0	0	0	0	0	-1	-1	0	0	0	0	0	-1	0	1	0	0	0	0	0	0	0
SPBC18H10.07	-1	0	0	0	0	0	0	1	0	-1	0	0	0	0	0	-1	0	-1	0	-1	0	-1	0	0	1	0	-1	0	0	0	0	-1	-1	-1	0	-1	0	-1	-1	0	-1	-1	-1	0	-1	0	0	0	0
SPBC1685.13	0	0	0	0	0	0	0	0	0	1	0	0	0	0	-1	0	0	0	0	-1	0	0	0	0	-1	0	0	0	0	0	0	-1	-1	-1	0	0	0	0	0	0	-1	0	0	0	0	0	0	0	0
SPBC409.19c	-1	0	0	0	0	0	0	0	0	1	0	0	0	1	0	-1	0	-1	0	-1	0	0	0	0	1	0	-1	0	0	0	0	-1	-1	-1	0	-1	0	-1	0	-1	-1	-1	-1	0	-1	0	-1	0	0
SPBC29B5.03c	0	0	0	1	0	0	0	0	0	-1	0	0	0	0	0	1	0	0	0	0	0	0	0	0	-1	0	0	0	0	0	0	1	0	0	0	0	0	0	0	0	0	0	0	0	0	0	0	0	0
SPBC26H8.03	0	0	0	0	0	0	0	0	1	1	0	0	0	0	0	-1	0	-1	0	-1	-1	-1	0	0	1	-1	-1	0	1	0	0	-1	-1	0	0	-1	0	0	-1	0	-1	-1	-1	0	0	0	0	-1	0
SPBC577.03c	0	0	0	0	0	0	0	0	0	1	0	0	0	0	1	0	0	0	0	0	0	0	0	0	-1	0	0	0	0	0	0	0	-1	-1	0	0	0	0	0	0	0	0	0	0	0	0	0	0	0
SPBC3D6.09	0	0	0	0	0	0	0	0	0	0	0	0	0	0	1	1	0	1	0	1	0	1	1	0	0	0	0	0	0	0	0	0	0	0	0	0	0	0	0	0	1	0	0	0	0	-1	0	0	0
SPBC3H7.03c	-1	-1	0	-1	-1	0	0	0	1	1	0	-1	0	0	0	-1	0	-1	0	-1	-1	-1	-1	0	-1	-1	-1	-1	-1	-1	0	1	1	0	0	-1	0	0	-1	-1	-1	-1	0	0	0	-1	-1	-1	0
SPBC713.11c	0	1	0	0	0	0	0	0	0	1	0	0	0	0	0	0	0	0	0	-1	0	-1	-1	0	1	0	0	-1	0	0	0	-1	-1	-1	0	0	0	0	0	0	0	0	0	0	0	0	0	0	0
SPBCPT2R1.02	0	0	0	0	0	0	0	0	0	-1	0	0	0	0	0	0	0	0	0	1	0	0	0	0	0	0	0	0	0	0	0	0	0	0	0	0	0	0	0	0	0	0	0	1	0	0	0	0	0
SPBPB2B2.13	0	0	0	0	0	0	0	0	0	-1	0	0	0	0	-1	0	0	0	0	0	0	0	0	0	0	0	0	0	0	0	0	0	0	0	0	0	0	0	0	0	0	-1	0	0	0	0	0	0	0
SPBC9B6.07	0	-1	1	-1	-1	1	1	1	1	1	1	1	1	0	1	-1	0	0	1	-1	-1	-1	1	0	0	0	-1	1	1	1	1	0	0	1	1	-1	1	0	0	0	-1	-1	-1	1	1	-1	-1	-1	-1
SPBPJ4664.02	0	0	0	0	0	0	0	0	0	0	0	0	0	0	0	0	0	0	0	1	0	0	0	0	0	0	0	0	0	0	0	0	0	0	0	0	0	0	0	0	0	1	0	0	0	0	0	0	0
SPBP8B7.23	0	1	0	0	0	0	0	0	0	1	0	0	0	0	0	0	0	0	0	0	0	0	0	0	-1	0	0	0	0	0	0	-1	-1	-1	0	0	0	0	0	0	0	1	0	0	0	0	0	0	1
SPCC794.15	0	0	0	0	0	0	0	1	0	-1	-1	0	0	0	-1	0	0	0	0	1	-1	0	-1	0	-1	-1	0	0	-1	0	0	1	1	1	0	0	1	1	1	0	0	-1	1	0	0	0	0	-1	0
SPCP1E11.06	-1	0	0	0	0	0	0	0	0	-1	0	-1	0	0	0	-1	0	0	0	-1	-1	-1	-1	0	0	0	-1	0	0	0	0	0	0	0	0	-1	0	-1	0	-1	-1	-1	-1	0	-1	0	-1	0	0
SPAC22F3.12c	0	0	0	0	0	0	0	0	0	0	0	0	0	0	0	0	0	0	0	1	0	1	0	0	1	0	0	0	0	0	0	0	0	0	0	0	0	0	0	0	0	0	0	0	1	0	0	0	0
SPBC24C6.06	0	0	0	0	0	0	0	0	0	-1	0	0	0	0	-1	0	0	0	0	-1	0	-1	0	0	1	0	0	0	0	0	0	1	1	0	0	0	0	0	0	0	-1	0	0	0	0	0	0	0	0
SPBC1105.14	0	0	0	0	-1	0	0	0	0	-1	0	0	0	0	0	-1	0	0	0	-1	-1	-1	0	0	0	-1	-1	0	0	0	0	-1	-1	0	0	-1	0	-1	0	0	-1	0	0	0	-1	0	0	0	0
SPCC1450.16c	0	0	0	0	0	0	0	0	0	0	0	0	0	0	-1	0	0	0	0	0	0	-1	0	0	0	0	0	0	0	0	0	0	0	0	0	0	0	0	0	0	0	0	0	0	0	0	0	0	0
SPAC23C11.14	0	0	0	1	1	0	0	0	0	-1	0	0	0	0	1	1	0	0	0	-1	0	1	0	0	0	0	1	0	0	0	0	1	0	0	0	0	0	0	0	0	-1	0	-1	0	1	0	0	0	0
SPBC354.05c	1	1	1	1	-1	1	0	0	1	-1	-1	1	-1	1	NA	NA	NA	NA	NA	1	1	NA	1	1	1	1	-1	1	1	1	1	1	1	1	-1	1	1	-1	-1	1	0	1	1	1	1	-1	1	0	1
SPCC63.14	0	0	0	0	0	0	0	0	0	0	0	0	0	0	0	0	0	0	0	-1	0	0	0	0	0	0	0	0	0	0	0	0	0	0	0	0	0	0	0	0	0	0	0	0	0	0	0	0	0
SPAC24C9.08	0	0	0	0	0	0	0	0	0	0	0	0	0	0	0	0	0	0	0	0	0	0	0	0	0	0	0	0	0	0	0	0	0	0	0	0	0	0	0	1	0	0	0	0	0	0	0	0	1
SPBC713.07c	0	0	0	0	0	0	0	0	0	-1	0	0	0	0	0	1	0	0	0	1	0	0	-1	0	1	0	-1	0	0	0	0	0	0	0	0	0	0	0	0	0	-1	1	0	-1	-1	0	0	1	1
SPAC15A10.05c	0	0	0	0	0	0	0	0	0	0	0	0	0	0	0	0	0	0	0	0	0	0	0	0	0	0	0	0	0	0	0	0	0	0	0	0	0	0	0	0	0	0	0	0	0	0	0	0	0
SPAC27D7.13c	0	0	0	0	0	0	0	0	0	1	0	0	0	0	1	0	0	0	0	1	0	0	0	0	0	0	0	0	0	0	0	0	0	0	0	1	0	0	0	0	0	0	0	0	0	0	0	0	0
SPCC1020.10	0	0	0	0	0	0	0	0	0	0	0	-1	0	0	0	0	0	0	0	1	0	0	0	0	1	0	0	0	0	0	0	0	0	0	0	0	0	0	0	0	0	0	0	0	0	0	0	0	0
SPAC1D4.06c	0	0	0	0	0	1	0	0	0	1	0	-1	0	0	1	-1	1	0	0	-1	0	-1	-1	-1	-1	-1	0	0	0	-1	0	1	1	-1	0	-1	0	0	0	0	-1	-1	1	-1	-1	-1	-1	0	0
SPAC2F7.08c	1	1	0	0	0	0	0	1	0	1	0	1	0	0	-1	0	0	0	0	-1	-1	-1	-1	0	1	0	0	0	0	0	0	-1	-1	-1	0	0	0	0	1	-1	0	1	-1	-1	1	0	1	1	0
SPCC1620.07c	0	0	0	0	0	0	0	0	0	-1	0	0	0	0	0	0	0	0	0	0	0	1	0	0	-1	0	0	0	0	0	0	0	0	0	0	0	0	0	0	0	0	0	0	0	0	0	0	0	0
SPAC31A2.11c	-1	0	0	0	0	0	0	0	0	0	0	0	0	1	0	-1	0	0	0	-1	-1	-1	-1	0	1	0	-1	0	0	0	0	0	0	0	-1	-1	0	0	-1	0	-1	-1	0	-1	-1	-1	-1	-1	0
SPAC31G5.19	0	0	0	0	0	0	0	0	0	1	0	0	0	1	0	-1	1	-1	0	-1	-1	-1	-1	0	1	0	-1	0	0	0	0	-1	-1	-1	0	-1	0	0	0	-1	-1	-1	-1	0	-1	0	0	0	0
SPAC5H10.13c	0	0	0	0	0	0	0	0	0	-1	0	0	0	0	-1	0	0	0	0	0	0	0	0	0	-1	0	0	0	0	0	0	0	0	0	0	0	0	0	0	0	0	-1	0	0	0	0	0	0	0
SPAC3A12.06c	0	0	0	0	0	0	0	0	0	0	0	0	0	0	-1	0	0	0	0	0	0	0	0	0	0	0	0	0	0	0	0	0	0	0	0	0	0	0	0	0	0	0	0	0	0	0	0	0	0
SPAC1071.05	0	1	0	0	0	0	0	0	0	-1	0	0	0	0	0	0	0	0	0	1	0	0	1	0	1	0	0	0	0	0	0	1	0	0	0	0	0	0	0	0	0	0	0	0	0	0	0	0	0
SPAPB1A10.05	0	0	0	0	0	0	0	0	0	0	0	0	0	0	0	0	0	0	0	0	0	0	0	0	-1	0	0	0	0	0	0	0	0	0	0	0	0	0	0	0	0	0	0	0	0	0	0	0	0
SPAC3H1.06c	0	0	0	0	0	0	0	0	0	1	0	0	0	0	1	0	0	0	0	1	0	0	0	0	0	0	0	0	0	0	0	-1	-1	-1	0	0	0	0	0	0	0	0	0	0	0	0	0	0	1
SPAC1486.02c	1	1	1	1	NA	1	NA	0	NA	NA	-1	0	-1	-1	NA	-1	NA	NA	-1	NA	0	NA	1	-1	-1	1	1	1	1	0	1	0	1	1	-1	-1	0	-1	0	-1	-1	1	0	1	1	NA	NA	NA	NA
SPBC16D10.07c	0	0	0	0	0	0	0	0	0	0	0	0	0	0	0	0	0	0	0	0	0	1	0	0	0	0	0	0	0	0	0	0	0	0	0	0	0	0	0	0	0	0	1	0	0	0	0	0	0
SPCC11E10.08	0	0	0	0	0	0	0	0	1	1	0	0	0	0	-1	-1	1	-1	-1	-1	-1	0	0	0	1	0	-1	0	0	0	0	0	0	0	0	-1	0	-1	0	-1	-1	-1	0	0	-1	0	-1	-1	0
SPAC11H11.03c	0	0	0	0	0	0	0	0	0	0	0	0	0	0	0	0	0	0	0	1	0	1	0	0	0	0	0	0	0	0	0	0	0	0	0	0	0	0	0	0	0	1	0	0	0	1	0	0	0
SPAC15E1.06	0	0	0	0	0	0	0	0	0	-1	0	0	0	0	-1	-1	0	-1	-1	-1	0	0	-1	-1	-1	-1	0	-1	0	-1	0	0	0	-1	0	0	0	0	0	1	0	-1	-1	0	0	0	0	0	-1
SPCC1450.05c	0	1	-1	0	0	0	1	0	-1	-1	0	0	0	0	0	0	0	0	0	1	1	NA	1	1	1	1	-1	1	0	1	0	1	1	1	-1	-1	0	0	0	-1	1	1	0	-1	-1	-1	0	0	0
SPAC12G12.12	0	0	0	0	0	0	0	0	0	1	0	0	0	0	0	0	0	0	0	1	0	1	0	0	0	0	0	0	0	0	0	0	0	0	0	1	0	0	0	0	1	0	0	1	0	0	0	0	0
SPAC1805.14	1	0	0	0	0	1	0	1	1	0	0	0	0	1	0	-1	0	0	0	-1	-1	0	-1	-1	0	-1	-1	0	-1	0	-1	0	0	-1	0	-1	0	0	0	0	-1	-1	-1	0	0	0	0	0	0
SPAC1805.08	0	0	0	0	0	0	0	0	0	1	0	0	0	0	-1	1	0	0	0	0	0	0	0	0	0	0	0	0	0	0	0	0	0	-1	0	0	0	0	0	0	1	0	0	0	0	0	0	0	0
SPCC338.11c	0	0	0	0	0	0	0	0	0	-1	0	0	0	0	0	0	0	0	0	0	0	1	1	0	1	0	0	0	0	0	0	0	0	0	0	0	0	0	0	0	0	1	0	0	0	0	0	0	0
SPAC15A10.06	0	0	0	0	0	0	0	0	0	0	0	0	0	0	-1	1	0	-1	0	1	0	1	0	0	0	0	0	0	0	-1	0	1	1	0	0	1	0	0	0	0	-1	1	1	0	-1	0	0	0	0
SPAC222.13c	0	0	0	0	0	0	0	0	0	0	0	0	0	0	1	0	0	0	0	1	0	1	0	0	0	0	0	0	0	0	0	0	0	0	0	0	0	0	0	0	0	0	0	0	0	0	0	0	0
SPAC23A1.11	0	1	1	1	0	1	0	0	1	1	0	-1	0	0	1	0	0	0	1	0	0	-1	0	0	0	-1	-1	-1	0	0	0	0	0	0	-1	-1	0	0	1	-1	-1	-1	0	0	1	-1	0	1	0
SPAC30C2.04	0	0	0	0	0	0	0	0	1	0	0	0	0	0	0	-1	0	0	0	-1	-1	0	0	0	1	0	-1	0	0	0	0	-1	-1	0	0	-1	0	-1	0	-1	-1	-1	-1	0	-1	0	0	0	0
SPAC2C4.08	0	0	0	0	0	0	0	0	0	0	0	0	0	0	0	0	0	0	0	1	0	1	0	0	0	0	0	0	0	0	0	0	0	0	0	0	0	0	0	0	0	0	0	0	0	0	0	0	0
SPAC1002.03c	0	0	0	0	0	0	0	0	0	0	0	0	0	0	1	1	0	0	0	-1	0	0	0	0	0	0	0	0	0	0	0	0	0	0	0	1	0	0	0	0	1	0	0	0	0	0	0	0	0
SPAC17C9.09c	0	0	0	0	0	0	0	0	0	-1	0	0	0	0	1	1	0	1	0	1	0	1	1	0	0	0	0	0	0	0	0	1	0	0	0	1	0	0	0	0	1	0	0	0	0	0	0	0	0
SPAC4G9.09c	0	0	0	0	0	0	0	-1	0	1	-1	0	0	0	1	0	0	0	0	-1	0	-1	0	0	0	0	0	0	0	0	0	-1	1	0	0	-1	0	0	0	0	0	0	-1	0	-1	0	0	0	0
SPAC5D6.01	1	1	0	0	0	0	0	0	0	0	0	0	0	0	1	0	0	1	0	1	0	0	0	0	0	0	0	0	0	0	0	1	0	0	0	0	0	0	1	0	1	0	0	0	0	0	0	0	1
SPAC16.01	0	0	0	0	0	0	0	0	0	1	0	0	0	0	0	0	0	0	-1	-1	0	-1	-1	0	1	0	0	0	0	0	0	1	0	0	0	0	0	0	0	0	1	0	0	0	0	1	0	0	0
SPAC1834.03c	0	0	0	0	0	0	0	0	0	-1	0	0	0	0	1	0	0	1	0	1	0	1	0	0	0	0	0	0	0	0	0	0	0	0	0	0	0	0	0	0	0	0	0	0	0	0	0	0	0
SPAC9E9.12c	0	0	0	0	0	0	0	0	0	-1	0	0	0	0	0	0	0	0	0	1	0	1	0	0	0	0	0	0	0	0	0	0	0	0	0	0	0	0	0	0	1	1	0	0	0	0	0	0	0
SPAC823.02	-1	0	-1	0	0	0	0	0	0	1	0	0	0	0	1	0	0	0	0	1	0	0	0	0	0	0	0	0	0	0	0	0	0	0	0	0	0	0	0	0	1	0	0	0	0	0	-1	0	0
SPAC19D5.07	0	0	0	0	0	0	0	0	0	-1	0	0	0	0	-1	0	0	0	0	1	0	0	0	0	-1	0	0	0	0	0	0	0	0	0	0	1	0	0	0	0	1	0	0	0	1	0	0	0	-1
SPAC19B12.08	0	0	0	0	0	0	0	0	0	0	0	0	0	0	1	0	0	0	0	1	0	0	0	0	1	0	1	0	0	0	0	-1	0	-1	0	1	0	0	0	0	1	0	0	0	0	0	0	0	0
SPBC1289.10c	1	1	1	1	0	0	0	0	0	1	-1	1	0	0	0	1	0	0	0	1	0	0	0	0	1	0	1	0	0	0	0	0	0	0	0	-1	0	0	1	0	0	0	1	-1	0	0	1	0	0
SPAPB17E12.04c	1	1	1	0	-1	0	0	0	0	-1	-1	0	0	0	-1	-1	0	-1	0	1	0	0	0	0	-1	0	0	0	0	1	0	0	0	0	0	1	0	0	0	0	-1	-1	0	0	-1	1	0	0	0
SPAC29E6.10c	0	0	0	0	0	0	0	0	0	-1	0	0	0	0	1	0	0	0	0	0	0	0	0	0	1	0	0	0	0	0	0	0	0	0	0	-1	0	0	0	0	0	0	0	0	-1	-1	0	0	0
SPAC20H4.02	0	1	1	1	0	1	1	0	0	-1	0	1	0	0	0	0	-1	1	1	-1	1	1	1	1	1	1	1	1	1	1	1	1	1	1	0	0	0	-1	0	-1	-1	-1	1	1	1	-1	0	0	-1
SPAC4F8.10c	0	0	0	0	0	0	0	0	0	1	0	0	0	0	0	0	0	0	0	0	0	0	0	0	-1	0	0	0	0	0	0	0	0	0	0	0	0	0	0	0	0	0	0	0	0	0	0	0	0
SPAC186.01	0	0	0	0	0	0	0	0	0	1	0	0	0	0	-1	0	0	1	0	1	0	1	0	0	0	0	0	0	0	0	0	0	0	0	0	0	0	0	0	0	0	1	1	0	0	0	0	0	0
SPBC1271.05c	0	0	0	0	0	0	0	0	0	-1	0	0	0	0	0	0	0	0	0	1	0	1	0	0	1	0	0	0	0	0	0	0	0	0	0	0	0	0	0	0	0	1	-1	0	0	0	0	0	0
SPAC521.04c	0	0	0	0	0	0	0	0	0	1	0	0	0	0	1	0	0	0	0	0	0	0	0	0	0	0	0	0	0	0	0	0	0	0	0	0	0	0	0	0	0	0	-1	0	0	0	0	0	0
SPAC24H6.10c	0	0	0	0	0	0	0	0	0	0	0	0	0	0	0	0	0	0	0	0	0	1	0	0	1	0	0	0	0	0	0	0	0	0	0	0	0	0	0	0	0	0	0	0	0	0	0	0	0
SPBC14F5.07	0	0	0	0	0	0	0	0	0	-1	0	0	0	0	0	0	0	0	0	-1	0	0	0	0	-1	0	1	0	0	0	0	0	0	0	0	0	0	0	0	0	0	0	-1	0	0	0	0	0	0
SPAC631.01c	0	0	0	0	0	0	0	0	0	0	0	0	0	0	0	0	0	-1	0	-1	0	NA	-1	0	0	0	1	-1	0	0	-1	0	0	0	0	-1	0	0	0	0	0	-1	-1	0	0	0	0	1	1
SPAC343.10	0	0	0	0	0	0	0	0	0	-1	0	0	0	0	-1	-1	0	0	0	-1	0	0	0	0	1	0	-1	0	1	0	0	0	0	0	0	-1	0	-1	0	0	-1	-1	-1	-1	-1	0	0	0	0
SPBC16G5.05c	0	0	0	0	0	0	0	0	0	1	0	0	0	0	-1	-1	0	0	0	-1	0	-1	-1	0	-1	0	1	-1	0	0	0	0	0	0	0	0	0	0	0	0	0	0	0	1	1	0	0	0	0
SPAC6C3.08	0	0	0	0	0	0	0	-1	0	-1	1	0	0	0	1	1	0	0	0	1	0	0	0	0	0	0	0	0	0	0	0	0	0	0	0	-1	0	0	1	0	0	0	0	-1	0	1	1	1	1
SPAC664.07c	0	0	0	0	0	0	0	0	0	1	0	0	0	0	0	-1	0	0	0	0	0	1	0	0	0	0	0	0	0	0	0	0	0	0	0	0	0	0	0	-1	-1	0	1	-1	0	0	0	0	0
SPBC1709.14	0	0	0	0	0	0	0	0	0	1	0	0	0	0	0	0	0	0	0	1	0	0	0	0	1	0	0	0	0	0	0	0	0	0	0	0	0	0	0	0	0	0	0	0	0	0	0	0	0
SPAC823.13c	0	0	0	0	0	0	0	0	0	1	0	0	0	0	0	0	0	0	0	0	0	0	0	0	0	0	0	0	0	0	0	0	0	0	0	0	0	0	0	0	0	0	0	0	1	0	0	0	0
SPAPB24D3.07c	0	0	0	0	0	0	0	0	0	0	0	0	0	0	0	0	0	0	0	0	0	0	0	0	0	0	0	0	0	0	0	0	0	0	0	0	0	0	0	0	0	0	0	0	0	0	0	0	0
SPBC17D1.06	0	0	0	0	-1	0	0	0	0	1	0	0	0	0	1	0	0	0	0	1	0	0	0	0	1	0	0	0	0	0	0	1	0	1	0	0	0	0	0	0	0	1	0	0	0	-1	0	0	0
SPAC8E11.03c	0	0	0	0	0	0	0	0	0	1	0	0	0	0	0	0	0	0	0	0	0	0	0	0	0	0	0	0	0	0	0	-1	-1	-1	0	0	0	0	0	0	0	0	0	0	0	0	0	0	1
SPBC1711.09c	0	0	0	0	0	0	0	0	0	1	0	0	0	0	0	0	0	0	0	1	0	0	0	0	1	0	0	0	0	0	0	0	0	0	0	0	0	0	0	0	0	0	1	0	0	0	0	0	0
SPBC19F8.08	1	1	1	1	-1	1	0	1	1	-1	-1	-1	0	0	1	-1	1	1	1	-1	0	-1	1	0	-1	1	-1	1	1	1	1	1	0	0	1	-1	1	0	1	0	0	1	-1	1	1	-1	1	1	0
SPACUNK12.02c	0	0	0	0	0	0	0	0	0	0	0	0	0	0	0	0	0	0	0	0	0	0	0	0	-1	0	0	0	0	0	0	0	0	0	0	0	0	0	0	0	0	0	-1	0	0	0	0	0	0
SPBC405.03c	0	0	0	0	0	0	0	0	0	1	0	0	0	0	-1	0	0	0	0	1	0	0	0	0	-1	0	0	0	0	0	0	0	0	0	0	0	0	0	0	0	0	0	0	0	0	0	0	0	0
SPBC649.03	0	0	0	0	0	0	0	0	1	1	-1	0	0	0	0	-1	0	-1	-1	-1	-1	-1	-1	0	-1	-1	-1	0	0	1	-1	0	-1	0	0	-1	0	-1	0	0	-1	-1	0	-1	-1	-1	0	0	0
SPBC25H2.05	0	0	0	0	0	0	0	-1	0	1	-1	0	0	0	0	0	0	-1	-1	-1	0	-1	-1	0	-1	0	0	0	0	0	0	-1	-1	0	0	0	0	0	0	0	0	-1	0	0	0	0	0	0	0
SPBC2A9.03	0	0	0	0	0	0	0	0	0	1	0	0	0	0	0	0	0	1	0	0	0	1	0	0	0	0	0	0	0	0	0	0	0	0	0	0	0	0	0	0	0	1	0	1	0	0	0	0	0
SPAPJ691.03	0	0	0	0	0	0	0	0	0	1	0	0	0	0	1	0	0	0	0	1	0	1	0	0	-1	0	0	0	0	0	0	0	0	0	0	0	0	0	-1	0	0	-1	0	-1	0	0	-1	0	0
SPAC637.11	0	0	0	0	0	0	0	0	1	1	0	0	0	0	0	-1	1	-1	0	-1	-1	0	0	0	1	-1	-1	0	0	0	0	0	0	0	0	-1	-1	0	0	-1	-1	-1	-1	0	-1	0	-1	0	0
SPBC32C12.03c	0	0	0	0	0	0	0	0	0	1	0	0	0	0	1	0	0	0	0	0	0	1	0	0	0	0	0	0	0	0	0	0	0	0	0	0	0	0	0	0	1	0	0	0	0	0	0	0	0
SPBC1604.09c	0	0	0	0	-1	-1	0	0	0	-1	0	0	0	0	0	0	0	0	0	1	0	0	0	0	0	0	0	0	0	0	0	1	1	1	0	0	0	0	0	0	1	0	1	0	0	-1	1	0	0
SPAPB1E7.06c	0	0	0	0	0	0	0	0	0	0	0	0	0	0	-1	-1	0	-1	0	-1	-1	-1	-1	0	1	-1	-1	0	0	0	0	0	0	-1	-1	-1	0	0	0	-1	-1	-1	-1	0	-1	0	0	0	0
SPBC342.06c	0	0	0	0	0	0	0	0	0	1	0	0	0	0	0	-1	0	0	0	0	0	0	0	0	0	0	0	0	0	0	0	0	-1	0	0	0	0	0	0	-1	-1	-1	0	0	0	0	0	0	0
SPBC19F8.01c	0	0	0	0	0	0	0	0	0	1	0	0	0	0	0	0	0	0	0	0	0	0	0	0	0	0	0	0	0	0	0	0	0	0	0	0	0	0	0	0	0	0	0	0	0	0	0	0	0
SPBC1685.14c	0	0	0	0	0	0	0	0	0	1	0	0	0	0	1	-1	0	0	0	1	0	-1	0	0	0	0	0	0	0	0	0	0	0	0	0	0	0	0	0	0	0	0	0	0	1	0	0	0	0
SPBC428.15	0	0	0	0	0	0	0	0	0	1	0	0	0	0	0	0	0	0	0	0	0	1	0	0	0	0	0	0	0	0	0	0	0	0	0	0	0	0	0	0	0	0	0	0	1	0	0	0	0
SPBC2D10.16	-1	0	0	0	-1	0	0	0	1	-1	0	0	0	-1	1	-1	0	0	0	-1	0	0	0	0	1	1	-1	0	0	0	0	0	0	0	-1	-1	-1	-1	-1	-1	-1	-1	-1	0	-1	0	0	0	0
SPBC27.08c	0	0	0	0	0	0	0	0	0	1	0	0	0	0	0	-1	0	0	0	-1	-1	-1	-1	0	0	-1	-1	0	0	0	0	0	0	0	0	-1	0	-1	0	-1	-1	-1	-1	0	0	0	0	0	0
SPBC577.13	0	0	0	0	0	0	0	0	0	1	0	0	0	0	0	0	0	0	0	-1	0	0	0	0	0	0	0	0	0	0	0	0	0	0	0	0	0	0	0	0	0	0	0	0	0	0	0	0	0
SPBC4B4.06	0	0	0	0	0	0	0	0	0	1	0	-1	0	0	-1	-1	0	-1	-1	-1	0	-1	-1	-1	0	-1	-1	-1	0	0	0	-1	-1	-1	-1	-1	0	-1	0	-1	-1	-1	-1	-1	-1	0	0	0	0
SPBC428.10	0	0	0	0	0	0	0	0	0	1	0	0	0	0	0	0	0	0	0	0	0	0	0	0	-1	0	0	0	0	0	0	-1	-1	-1	0	0	0	0	0	0	0	0	0	0	0	0	0	0	0
SPBC725.01	0	0	0	0	0	0	0	0	0	1	0	0	0	1	1	-1	0	-1	0	-1	-1	-1	-1	0	1	0	-1	0	0	0	0	0	-1	-1	0	-1	0	-1	0	-1	-1	-1	-1	0	-1	0	0	0	0
SPBCPT2R1.08c	0	0	0	0	0	0	0	0	0	0	0	0	0	0	0	0	0	0	0	1	0	0	0	0	0	0	0	0	0	0	0	0	0	0	0	0	0	0	0	0	0	0	0	0	0	0	0	0	0
SPCC11E10.04	0	0	0	0	0	0	0	0	0	1	0	0	0	0	1	0	0	0	0	-1	0	0	0	0	-1	0	0	0	0	0	0	0	0	-1	0	0	0	0	0	0	0	0	0	0	0	0	0	0	0
SPBC9B6.09c	0	0	0	0	0	0	0	0	0	1	0	0	0	0	0	0	0	0	0	0	0	0	0	0	0	0	0	0	0	0	0	0	0	0	0	0	0	0	0	0	0	0	0	1	0	0	0	0	0
SPCC1183.10	0	0	0	0	0	0	0	0	0	1	0	0	0	0	0	0	0	0	0	1	0	0	0	0	-1	0	0	0	0	0	0	0	-1	0	0	0	0	0	0	0	0	0	0	1	0	0	0	0	0
SPCC23B6.04c	0	0	0	0	-1	0	0	0	0	-1	0	-1	0	0	0	-1	0	-1	0	-1	0	-1	-1	-1	-1	-1	1	-1	0	-1	-1	-1	-1	0	0	0	0	0	0	0	-1	-1	-1	-1	0	1	0	0	0
SPBP8B7.25	-1	0	-1	-1	1	-1	-1	0	0	-1	0	1	0	0	1	0	0	1	0	-1	0	-1	-1	0	1	1	0	0	0	0	0	0	0	0	1	0	0	0	0	0	0	1	0	-1	1	0	-1	-1	0
SPAC1093.06c	0	0	0	0	0	0	0	0	0	-1	-1	0	0	0	-1	0	0	0	0	0	0	-1	0	0	0	0	0	0	0	0	0	0	0	0	0	0	0	0	0	0	0	0	0	0	0	0	0	0	0
SPCP25A2.02c	0	0	0	0	0	0	0	0	0	1	0	1	0	0	0	0	0	0	0	0	0	1	0	0	0	0	0	0	0	0	0	0	0	0	0	0	0	0	0	-1	0	0	0	0	0	0	0	0	0
SPBC24C6.09c	0	0	0	0	0	0	0	0	0	1	0	0	0	0	0	0	0	1	0	1	0	1	0	0	0	0	0	0	0	0	0	0	0	0	0	0	0	0	0	0	0	1	0	0	0	0	0	0	0
SPCC1672.03c	0	0	0	0	0	0	0	0	0	0	0	0	0	0	0	0	0	0	0	0	0	1	0	0	0	0	0	0	0	0	0	0	0	0	0	0	0	0	0	0	0	0	0	0	0	0	0	0	0
SPAC23C4.02	0	0	0	0	0	0	0	0	0	1	0	0	0	0	1	0	0	0	0	1	0	1	0	0	0	0	0	0	0	0	0	0	0	0	0	0	0	0	0	0	0	0	-1	0	0	0	1	0	0
SPBC365.07c	0	0	0	0	0	0	0	0	0	-1	0	0	0	0	-1	0	0	0	0	0	0	0	0	0	-1	0	0	0	0	0	0	1	0	0	0	0	0	0	0	0	0	0	1	0	-1	0	1	0	0
SPCC663.08c	0	0	0	0	0	0	0	0	0	1	0	0	0	0	0	0	0	0	0	0	0	0	0	0	0	0	0	0	0	0	0	0	0	0	0	0	0	0	0	0	0	0	0	0	0	0	0	0	0
SPAC24C9.14	0	0	0	0	0	0	0	0	0	1	0	0	0	0	1	0	0	0	0	1	0	1	0	0	0	0	0	0	0	0	0	0	0	0	0	0	0	0	0	0	0	0	0	0	0	0	0	0	1
SPBC725.07	0	0	0	1	-1	0	0	0	0	-1	0	0	0	0	-1	0	1	0	0	0	0	0	0	0	-1	0	0	0	0	0	0	0	0	0	0	1	0	0	0	0	-1	0	0	0	0	-1	0	0	1
SPAC15A10.09c	0	0	0	0	0	0	0	0	0	1	0	0	0	0	0	0	0	-1	0	1	0	0	0	0	-1	0	-1	0	0	0	0	0	0	0	0	0	0	0	0	0	0	0	0	0	0	0	0	0	0
SPCC11E10.05c	1	1	1	0	0	0	0	0	0	-1	0	0	0	0	-1	0	0	0	0	1	0	1	0	0	1	0	1	0	0	0	0	0	0	0	0	0	0	0	0	0	0	0	1	0	0	0	1	1	0
SPAC1F12.05	0	0	0	0	0	0	0	0	0	-1	0	0	0	0	0	0	0	0	0	0	0	1	0	0	-1	-1	0	0	0	0	0	1	0	0	0	0	0	0	0	0	-1	-1	1	0	0	0	0	0	0
SPAC2F7.09c	-1	-1	-1	-1	0	0	0	0	0	1	0	0	0	0	1	0	0	0	0	0	0	0	0	0	0	0	0	0	0	0	0	0	0	-1	0	0	0	0	-1	0	0	-1	0	0	1	0	-1	0	0
SPCC16A11.04	0	0	0	0	0	0	0	0	0	1	0	0	0	0	0	0	0	0	0	1	0	0	0	0	1	0	-1	0	0	0	0	0	0	0	0	0	0	0	0	0	0	0	0	0	0	0	1	0	1
SPAC328.01c	0	0	0	0	0	0	0	0	0	1	0	0	0	0	0	0	0	0	0	0	0	0	0	0	0	0	0	0	0	0	0	-1	0	0	0	0	0	0	0	0	0	-1	-1	-1	0	0	0	0	0
SPCC417.12	0	0	0	0	0	0	0	0	0	1	0	0	0	0	0	0	0	0	0	1	0	1	0	0	0	0	0	0	0	0	0	0	1	0	0	1	0	0	0	0	1	1	1	0	0	0	0	0	0
SPAC630.14c	0	0	0	0	0	0	0	1	1	0	0	1	0	1	1	-1	0	0	0	-1	-1	-1	-1	0	1	-1	-1	0	0	0	0	0	-1	0	0	-1	0	0	0	-1	-1	-1	-1	0	-1	0	0	0	0
SPAC3A12.09c	0	0	0	0	0	0	0	0	0	1	0	0	0	0	1	0	0	0	0	1	0	0	0	0	0	0	0	0	0	0	0	0	0	0	0	0	0	0	0	0	0	0	0	0	0	0	0	0	0
SPAC110.02	-1	0	0	0	0	0	0	0	0	-1	0	0	0	0	1	0	0	-1	0	0	1	0	0	0	1	1	1	0	0	1	0	0	-1	0	0	-1	0	0	0	0	0	0	0	-1	0	0	0	0	1
SPAPJ696.01c	0	0	0	0	-1	0	0	0	0	1	0	0	0	0	-1	-1	0	-1	0	-1	-1	-1	-1	-1	-1	-1	-1	-1	0	-1	0	0	0	0	0	-1	0	0	0	0	-1	-1	0	0	-1	0	0	0	0
SPAC3H1.10	0	0	0	0	0	0	0	0	0	0	0	0	0	0	-1	0	0	0	0	0	0	0	0	0	1	0	0	0	0	0	0	-1	0	0	0	0	0	0	0	0	0	0	0	0	0	1	0	0	0
SPAC14C4.15c	0	0	0	0	0	0	0	0	0	-1	0	0	0	0	0	0	0	0	0	0	0	0	0	0	0	0	-1	0	0	0	0	0	0	0	0	0	0	0	0	0	0	1	0	0	0	0	0	0	1
SPBC16E9.02c	0	0	0	0	0	0	0	0	0	0	0	0	0	0	0	0	0	0	0	0	-1	0	0	0	-1	0	0	0	0	0	0	0	0	0	0	0	0	0	0	0	0	0	0	0	0	0	0	0	0
SPAC11E3.10	0	0	0	0	0	0	0	0	0	-1	0	0	0	0	0	1	0	0	0	0	0	1	0	0	-1	0	0	0	0	0	0	0	0	-1	0	0	0	0	0	0	0	0	0	0	0	0	0	0	0
SPCC1223.05c	1	-1	1	0	-1	1	1	0	1	-1	-1	-1	0	-1	0	0	0	1	1	-1	-1	NA	-1	0	0	1	-1	1	-1	1	1	1	1	1	-1	-1	1	-1	1	-1	-1	-1	1	1	0	-1	1	0	-1
SPAC11D3.17	0	0	0	0	0	0	0	0	0	-1	0	0	0	0	0	0	0	0	1	1	0	1	0	0	0	0	0	0	0	0	0	0	0	1	0	0	0	0	0	0	0	0	0	1	0	0	0	0	0
SPAC1296.01c	0	0	0	0	0	0	0	0	0	1	0	0	0	0	1	0	0	0	0	0	0	1	0	0	0	0	0	0	0	0	0	0	0	1	0	0	0	0	0	0	0	1	0	1	0	0	0	0	0
SPAC15E1.09	0	0	0	0	0	0	0	0	0	1	0	0	0	0	0	0	0	0	0	0	0	0	0	0	-1	0	0	0	0	0	0	0	0	0	0	0	0	0	0	0	0	-1	0	0	0	0	0	0	0
SPCC1450.11c	0	0	0	0	0	0	0	0	0	0	0	0	0	0	0	0	0	0	0	1	0	1	1	0	1	0	0	0	0	0	0	0	0	0	0	0	0	0	0	0	0	0	0	0	0	0	0	0	0
SPAC139.04c	0	0	0	0	0	0	0	0	0	-1	0	0	0	0	0	1	0	0	0	1	0	1	0	0	1	0	0	0	0	0	0	0	0	1	0	0	0	0	0	0	1	1	0	0	0	0	0	0	0
SPAC1805.15c	0	0	0	0	0	0	0	0	0	-1	0	0	0	0	1	0	0	0	0	0	0	0	0	0	1	0	0	0	0	0	0	0	0	0	0	0	0	0	0	0	0	1	0	0	0	0	0	0	0
SPAC1851.02	-1	-1	-1	-1	0	0	0	0	0	0	0	-1	0	0	1	-1	0	0	0	-1	0	-1	0	0	1	0	0	0	0	0	0	0	0	0	0	-1	0	0	0	0	0	0	1	0	0	0	0	0	0
SPCC417.06c	0	0	0	0	0	0	0	-1	0	0	0	0	0	0	0	1	0	0	0	0	0	0	0	0	0	0	0	0	0	0	0	0	0	0	0	0	0	0	0	0	1	1	0	0	0	0	0	0	0
SPAC15A10.10	0	0	0	0	0	0	0	0	0	-1	0	0	0	0	0	0	0	0	0	0	0	0	0	0	0	0	0	0	0	0	0	0	0	0	0	0	0	0	0	0	0	0	0	0	0	0	0	0	0
SPAC22A12.06c	0	0	0	0	0	0	0	0	0	0	0	0	0	0	0	0	0	0	0	1	0	0	0	0	0	0	0	0	0	0	0	-1	-1	0	0	0	0	0	0	0	0	0	-1	1	0	0	0	0	0
SPAC23C11.08	0	0	0	0	0	0	0	0	1	0	0	0	0	0	0	-1	0	-1	0	-1	0	-1	0	0	1	0	-1	0	0	0	0	-1	0	-1	0	-1	0	-1	0	-1	-1	-1	-1	0	-1	0	0	0	0
SPCC736.08	0	0	0	0	0	0	0	0	0	-1	0	0	0	0	0	-1	0	0	0	-1	0	0	0	0	1	0	-1	0	1	0	0	0	0	0	-1	-1	0	0	0	-1	-1	-1	-1	0	-1	-1	0	0	0
SPAC16C9.06c	0	0	0	0	1	0	0	0	0	1	-1	0	0	0	1	0	0	1	0	1	0	-1	1	0	-1	-1	0	-1	0	-1	0	-1	0	-1	0	0	0	0	0	0	0	0	0	0	1	0	0	0	0
SPAC30D11.10	0	0	0	0	0	0	0	0	0	0	0	0	0	0	1	-1	0	0	0	-1	-1	-1	0	0	1	0	-1	0	0	0	0	-1	0	0	0	-1	0	-1	0	0	-1	0	-1	0	-1	0	0	0	0
SPAC2C4.09	0	0	0	0	-1	0	0	1	0	-1	0	0	0	0	-1	0	0	0	0	1	0	1	0	0	0	0	0	0	0	0	0	1	1	0	0	0	0	0	0	0	0	0	0	0	0	0	0	0	0
SPAC1002.05c	0	0	0	0	0	0	0	0	0	-1	0	0	0	0	0	0	0	0	0	0	0	0	0	0	0	0	0	0	0	0	0	0	0	0	0	0	0	0	0	0	0	1	0	0	0	0	0	0	0
SPAC17D4.03c	0	0	0	0	0	0	0	0	0	1	0	0	0	-1	0	0	0	-1	0	-1	-1	1	-1	0	-1	-1	-1	0	0	0	0	0	0	0	0	0	0	-1	0	0	0	0	0	0	0	0	1	0	0
SPAC4H3.02c	1	0	0	0	1	0	0	0	0	1	0	0	0	0	-1	0	0	0	0	-1	0	0	0	0	1	0	0	0	0	0	0	0	0	-1	0	-1	0	0	0	0	0	-1	0	0	0	0	1	0	0
SPAC5D6.08c	0	0	0	0	0	0	0	0	0	1	0	0	0	0	0	0	0	0	0	0	0	0	0	0	0	0	0	0	0	0	0	0	0	0	0	0	0	0	0	0	0	0	0	0	0	0	0	0	0
SPAC1751.01c	0	0	0	0	0	0	0	0	0	0	0	0	0	0	0	0	0	0	0	0	0	0	0	0	0	0	0	0	0	0	0	0	0	0	0	1	0	0	0	0	1	0	1	0	0	0	0	0	0
SPAC1834.05	0	1	0	0	-1	0	0	0	1	-1	0	0	0	0	0	-1	0	0	0	-1	0	-1	-1	-1	1	0	0	0	0	1	0	-1	-1	0	0	0	0	0	0	0	-1	-1	1	0	-1	0	0	0	-1
SPACUNK4.17	0	0	0	0	0	0	0	0	0	1	0	0	0	0	0	0	0	0	0	1	0	0	0	0	-1	0	0	0	0	0	0	0	0	0	0	0	0	0	0	0	0	0	1	0	0	0	0	-1	0
SPAC824.07	0	0	0	0	0	0	0	1	0	1	0	0	0	0	0	0	0	0	0	1	0	0	0	0	-1	0	0	0	0	0	0	0	0	0	0	0	0	0	-1	0	0	0	1	0	0	0	0	0	0
SPAC19G12.02c	0	0	0	0	0	0	0	0	0	1	0	0	0	0	1	0	0	0	0	0	0	0	0	0	0	0	0	0	0	0	0	0	0	0	0	0	0	0	0	0	1	0	0	0	0	0	0	0	0
SPAC19B12.10	0	0	-1	0	0	0	0	0	0	0	0	0	0	0	0	0	0	-1	-1	-1	0	-1	-1	0	-1	0	0	-1	0	0	0	0	0	0	0	0	0	0	0	0	-1	-1	1	-1	-1	0	0	-1	0
SPBC1289.16c	0	0	0	0	0	0	0	0	0	1	0	0	0	0	0	0	0	0	0	0	0	0	0	0	-1	0	0	0	0	0	0	-1	-1	0	0	0	0	0	0	0	-1	1	0	1	0	0	0	0	0
SPAPB17E12.05	1	1	0	0	-1	0	0	0	0	-1	-1	-1	-1	-1	-1	-1	1	0	0	-1	0	-1	0	1	0	0	-1	1	0	0	1	0	-1	1	0	-1	0	0	0	-1	-1	-1	0	0	0	-1	1	0	-1
SPAC2F7.03c	0	0	0	0	0	0	0	0	1	-1	0	0	0	0	-1	-1	0	-1	0	-1	-1	-1	0	0	0	0	-1	-1	0	0	0	-1	-1	0	0	-1	-1	-1	0	-1	-1	-1	-1	-1	-1	-1	0	0	0
SPAC20H4.05c	0	0	0	0	0	0	0	0	0	-1	-1	0	0	0	-1	0	0	0	0	1	0	0	0	0	1	1	0	0	0	0	0	0	0	0	0	0	0	0	0	0	0	0	0	0	0	0	0	0	0
SPBC17A3.05c	1	-1	1	-1	1	1	1	1	1	1	1	1	1	-1	0	-1	1	1	1	-1	-1	NA	0	0	-1	1	-1	-1	-1	1	1	-1	0	-1	1	-1	1	1	1	-1	-1	1	-1	1	1	1	-1	1	-1
SPAC4F8.11	0	0	0	0	0	0	0	0	0	1	0	0	0	0	0	0	0	0	0	0	0	0	0	0	0	0	0	0	0	0	0	0	-1	-1	0	0	0	0	0	0	0	0	0	0	0	0	0	0	0
SPAC1952.11c	0	0	0	0	0	0	0	0	0	1	0	0	0	0	0	0	0	1	0	1	0	-1	0	0	-1	0	0	0	0	0	0	0	0	0	0	0	0	0	0	0	1	0	0	0	0	0	0	0	0
SPBC12C2.02c	0	0	0	0	0	0	0	0	0	1	0	0	0	0	-1	0	0	0	0	1	0	1	-1	0	1	0	0	0	0	0	0	-1	0	-1	0	0	0	0	0	-1	0	1	-1	0	0	0	0	0	0
SPAC56E4.03	0	0	0	0	0	0	0	0	1	1	0	0	0	1	1	-1	1	-1	0	-1	-1	-1	-1	0	1	-1	-1	0	1	0	0	-1	-1	-1	-1	-1	0	-1	0	0	-1	-1	0	0	-1	0	0	0	1
SPAC25B8.17	0	0	0	0	0	0	0	0	0	-1	0	0	0	0	0	0	0	0	0	0	0	0	0	0	0	0	0	0	0	0	0	0	0	0	0	0	0	0	0	0	0	0	0	0	-1	0	0	0	0
SPBC14F5.10c	0	0	0	0	0	0	0	0	0	-1	0	0	0	0	0	0	0	0	0	0	0	0	0	0	-1	0	0	0	0	0	0	0	0	0	0	0	0	0	0	0	0	0	0	0	0	0	0	0	0
SPAC637.06	-1	1	0	0	0	0	0	0	1	-1	0	0	0	1	0	-1	0	-1	0	-1	0	-1	-1	0	1	0	-1	0	0	0	0	-1	-1	-1	0	-1	0	-1	0	0	-1	-1	-1	0	-1	0	0	0	0
SPAC3A12.17c	0	0	0	0	0	0	0	0	0	1	0	0	0	0	0	0	0	0	0	0	0	-1	0	0	0	0	0	0	0	0	0	0	0	0	0	0	0	0	0	0	0	1	0	0	0	0	0	0	0
SPBC16G5.16	0	0	0	0	0	0	0	0	0	1	0	0	0	0	0	0	0	0	0	-1	0	0	0	0	0	0	0	0	0	0	0	-1	0	0	0	1	0	0	0	0	0	-1	0	0	1	0	0	0	0
SPAC6F12.09	0	1	1	0	0	0	0	0	1	-1	0	0	0	0	0	0	0	0	0	-1	-1	0	0	-1	-1	0	-1	0	-1	0	0	0	1	0	-1	-1	0	0	1	0	-1	0	0	0	-1	-1	1	0	0
SPAC688.06c	0	0	0	0	0	0	0	0	0	-1	0	0	0	0	0	0	0	0	0	-1	0	1	0	0	0	0	0	0	0	0	0	0	0	0	0	0	0	0	0	0	0	0	0	0	0	0	0	0	0
SPBC1718.02	0	0	0	0	0	0	0	0	0	1	0	0	0	0	0	0	0	0	0	1	0	0	0	0	0	0	0	0	0	0	0	0	0	0	0	0	0	0	0	0	0	1	0	0	0	0	0	0	0
SPAC823.14	0	0	0	0	0	0	0	0	0	-1	0	0	0	0	0	0	0	0	0	0	0	0	0	0	-1	0	0	0	0	0	0	0	0	0	0	0	0	0	0	0	0	0	0	0	0	0	0	0	0
SPBC11B10.02c	0	0	0	0	0	0	0	0	0	-1	0	0	0	0	0	-1	0	-1	0	-1	0	0	0	0	1	0	-1	0	0	0	0	0	0	0	-1	-1	0	-1	0	-1	-1	-1	-1	0	-1	0	0	0	0
SPBC17D1.07c	0	0	0	0	0	0	0	0	0	1	0	0	0	0	0	0	0	0	0	1	0	1	0	0	0	0	0	0	0	0	0	0	0	0	0	0	0	0	0	0	1	0	0	0	0	0	0	0	0
SPAC8F11.03	0	0	0	0	0	0	0	0	0	1	0	0	0	0	-1	0	0	0	0	0	0	0	0	0	0	0	0	0	0	0	0	0	0	0	0	0	0	0	0	0	0	-1	0	0	0	0	0	0	0
SPBC1773.06c	0	1	0	0	0	0	0	0	0	1	0	0	0	0	-1	0	0	0	0	1	0	0	0	0	0	0	0	0	0	0	0	0	0	0	0	0	0	0	0	0	0	0	1	0	0	0	0	0	0
SPACUNK4.11c	0	0	0	0	0	0	0	0	0	1	0	0	0	0	0	0	0	0	0	0	0	0	0	0	0	0	0	0	0	0	0	0	0	0	0	-1	0	0	0	0	0	0	0	0	0	0	0	0	0
SPBC405.04c	1	1	1	1	0	0	0	-1	0	-1	0	1	0	0	-1	0	0	-1	-1	-1	0	-1	-1	-1	-1	-1	0	-1	0	-1	0	0	0	0	0	-1	0	1	1	0	-1	-1	0	-1	0	1	1	0	0
SPBC21B10.13c	1	1	1	1	-1	1	1	0	-1	0	0	0	1	0	0	1	0	1	1	-1	1	NA	1	1	1	1	1	1	1	1	1	-1	1	-1	-1	-1	-1	-1	0	-1	-1	-1	-1	-1	-1	-1	1	-1	1
SPBC106.12c	0	0	0	0	0	0	0	0	0	0	0	0	0	0	0	0	0	0	0	0	0	0	0	0	0	0	0	0	0	0	0	0	0	0	0	0	0	0	0	0	0	0	0	0	0	0	0	0	0
SPBC651.05c	0	0	0	0	0	0	0	0	0	-1	0	0	0	0	0	0	0	-1	-1	-1	-1	-1	-1	0	-1	0	0	-1	0	0	0	1	0	0	0	0	0	0	0	0	-1	-1	1	-1	-1	0	0	0	0
SPBC25H2.08c	-1	-1	0	0	-1	0	0	0	0	1	0	0	0	0	0	-1	1	0	0	-1	-1	-1	0	0	0	0	-1	0	0	0	-1	0	0	0	0	0	0	0	-1	0	-1	-1	0	0	0	0	-1	0	0
SPBC2A9.04c	0	0	0	0	0	0	0	0	0	0	0	0	0	0	1	0	0	0	1	1	0	0	0	0	-1	0	0	0	0	0	0	0	0	0	0	0	0	-1	0	0	0	1	0	0	0	-1	0	0	0
SPBC106.05c	-1	-1	-1	0	0	-1	0	0	0	1	0	0	0	0	1	0	0	0	0	0	0	0	0	0	-1	0	0	0	0	0	0	0	0	0	0	0	0	0	-1	0	0	0	0	-1	0	-1	0	0	0
SPAC688.10	0	0	0	0	0	0	0	0	0	1	0	0	0	0	0	0	0	0	0	1	0	0	0	0	-1	0	0	0	0	0	0	0	-1	0	0	0	0	0	0	0	0	-1	0	0	0	0	0	0	0
SPBC32F12.02	0	1	0	0	-1	0	0	1	0	-1	-1	0	0	0	1	0	1	1	0	0	1	-1	1	0	1	1	0	1	1	1	0	1	0	0	1	0	0	0	1	0	1	1	0	0	0	-1	0	-1	-1
SPBC1604.18c	0	1	0	0	0	0	0	0	0	1	0	0	0	0	0	-1	0	-1	0	1	0	0	0	0	0	0	0	0	0	0	0	0	0	0	0	-1	0	0	0	0	0	0	0	0	0	0	0	0	0
SPAPB1E7.08c	0	0	0	0	0	0	0	0	0	1	0	0	0	0	0	0	0	0	0	0	0	0	0	0	0	0	0	0	0	0	0	0	0	0	0	0	0	0	0	0	0	0	0	0	0	0	0	0	0
SPBC354.13	0	0	0	0	0	0	0	0	0	0	0	0	0	0	0	0	0	0	0	1	0	-1	-1	0	0	0	-1	0	0	0	0	0	0	0	0	0	0	0	0	0	0	0	0	0	0	0	0	0	0
SPBC215.04	0	-1	1	0	0	0	0	0	0	-1	0	-1	0	0	0	0	0	-1	0	-1	-1	-1	-1	0	1	0	0	0	0	0	0	-1	1	-1	0	0	0	0	0	0	0	-1	0	-1	0	0	0	0	0
SPBC16A3.06	0	0	0	0	0	0	0	0	0	0	0	0	0	0	0	0	0	0	0	0	0	0	0	0	0	0	0	0	0	0	0	0	0	0	0	0	0	0	0	0	0	0	-1	0	0	0	0	0	0
SPBC4B4.04	0	1	0	0	0	0	0	0	0	-1	0	0	0	0	1	0	0	0	0	1	0	0	0	0	1	0	0	0	0	0	0	1	0	1	0	0	0	1	0	0	0	1	1	0	0	0	0	0	0
SPBC2D10.20	0	0	0	0	0	0	0	0	0	0	0	0	0	0	0	0	0	0	0	0	0	0	0	0	-1	0	0	0	0	0	0	0	0	0	0	0	0	0	0	0	0	0	0	0	0	0	0	0	0
SPBC2D10.04	0	0	0	0	0	0	0	0	0	-1	0	0	0	0	1	0	0	0	0	-1	0	0	-1	0	0	-1	0	0	0	0	0	1	1	0	0	0	0	0	0	0	-1	-1	0	-1	0	0	0	-1	0
SPBC582.09	0	0	0	0	0	0	0	0	0	1	0	0	0	0	-1	0	0	0	0	1	0	0	0	0	-1	0	0	0	0	0	0	0	0	0	0	0	0	0	0	0	0	0	0	0	0	0	0	0	0
SPBC4C3.12	1	1	1	1	-1	1	1	1	1	NA	1	1	1	1	-1	-1	-1	-1	1	NA	1	NA	-1	0	1	0	-1	-1	0	0	0	-1	1	1	-1	-1	1	-1	1	-1	-1	-1	-1	0	-1	-1	1	0	-1
SPBC4F6.06	-1	1	-1	1	-1	-1	0	-1	-1	0	-1	-1	1	1	1	-1	-1	-1	1	-1	1	0	1	-1	1	-1	-1	1	1	-1	-1	-1	1	-1	0	-1	-1	-1	1	1	-1	1	1	-1	-1	1	0	-1	0
SPBC776.01	0	0	0	0	0	0	0	0	0	1	0	0	0	0	1	0	0	0	0	-1	0	-1	0	0	0	0	0	0	0	0	0	0	0	0	0	0	0	0	0	0	0	0	0	0	0	0	0	0	0
SPBP22H7.08	0	0	1	1	-1	1	0	0	0	-1	0	-1	0	-1	1	-1	0	0	0	-1	-1	-1	-1	0	1	0	-1	0	0	1	0	0	-1	1	0	-1	0	-1	1	0	-1	-1	0	0	1	-1	0	0	0
SPCC1223.03c	0	0	0	0	0	0	0	0	0	1	0	0	0	0	0	0	0	0	0	-1	0	0	0	0	0	0	0	0	0	0	0	0	0	0	0	0	0	0	0	0	0	0	0	0	0	0	0	0	0
SPBP16F5.03c	0	0	0	0	0	0	0	0	0	1	0	-1	0	0	-1	-1	0	-1	0	-1	0	-1	-1	0	1	0	1	0	0	0	0	0	0	-1	0	0	0	0	0	0	1	0	0	0	0	0	0	0	0
SPCC1223.15c	0	0	0	1	-1	0	1	0	-1	-1	0	0	1	0	-1	0	0	0	1	-1	-1	-1	-1	0	-1	0	-1	-1	0	0	0	0	1	1	0	-1	0	0	0	-1	-1	-1	0	-1	0	-1	1	0	0
SPBP8B7.30c	0	0	0	0	0	0	0	0	0	1	0	0	0	0	0	0	0	0	0	1	0	1	0	0	0	0	0	0	0	0	0	0	0	0	0	0	0	0	0	0	0	1	0	0	0	1	0	0	0
SPAC1006.06	0	0	0	0	0	0	0	0	0	1	0	0	0	0	-1	0	0	0	0	0	0	0	0	0	0	0	0	0	0	0	0	0	-1	0	0	0	0	0	0	0	0	0	0	1	0	0	0	0	0
SPCP31B10.06	0	0	0	0	0	0	0	0	0	1	0	0	0	0	-1	0	0	0	0	0	0	0	0	0	0	0	0	0	0	0	0	0	0	0	0	0	0	0	0	0	0	0	0	0	0	0	0	0	0
SPAC22F8.04	0	0	0	0	-1	0	0	0	1	-1	0	0	0	0	1	-1	0	-1	1	-1	0	-1	0	0	0	-1	0	0	0	0	0	-1	-1	0	0	-1	0	-1	0	0	-1	-1	-1	0	-1	0	0	-1	0
SPBC29B5.02c	0	0	0	0	0	0	0	0	0	0	1	0	0	0	1	0	0	1	1	1	0	0	0	0	0	0	0	0	0	0	0	0	0	0	0	0	0	0	0	0	1	1	0	1	0	0	0	0	0
SPCC16A11.01	0	0	0	0	0	0	0	0	0	1	0	0	0	0	0	0	0	0	0	1	0	0	0	0	0	0	0	0	0	0	0	0	0	0	0	0	0	0	0	0	0	-1	0	0	0	0	0	0	0
SPAC23D3.01	0	0	0	0	0	0	0	0	0	-1	0	0	0	0	0	0	0	0	0	1	0	1	0	0	0	0	1	0	0	0	0	0	0	0	0	0	0	0	0	0	0	0	-1	0	0	0	1	0	0
SPBC3D6.02	0	0	0	0	0	0	0	0	0	1	0	0	0	0	0	0	0	-1	0	0	0	1	-1	0	1	0	0	0	0	0	0	0	0	0	0	0	0	0	0	0	0	-1	0	0	0	0	0	0	0
SPCC737.07c	0	0	0	0	0	0	0	0	0	-1	0	0	0	0	0	0	0	0	0	1	0	0	0	0	0	0	0	0	0	0	0	0	0	0	0	0	0	0	0	0	0	0	1	0	0	0	0	0	0
SPAC25B8.11	0	0	0	0	0	0	0	0	0	1	0	0	0	0	0	0	0	0	0	1	0	0	0	0	0	0	0	0	0	0	0	0	0	0	0	0	0	0	0	0	0	1	0	0	0	0	0	0	0
SPBC725.14	0	-1	0	0	0	0	0	0	0	1	0	0	0	0	0	-1	0	0	0	-1	0	-1	0	0	-1	0	-1	0	1	0	0	1	1	-1	0	-1	0	0	0	-1	-1	-1	-1	0	-1	0	0	0	0
SPAC167.04	0	0	0	0	0	0	0	0	0	0	0	0	0	0	0	1	0	0	0	0	0	0	0	0	0	0	0	0	0	0	0	0	0	0	0	0	0	0	0	0	0	0	0	-1	0	0	0	0	0
SPAC27E2.03c	0	0	0	0	0	0	1	0	1	0	0	0	0	1	1	-1	1	0	0	-1	-1	-1	-1	0	-1	-1	-1	0	-1	0	0	-1	-1	-1	0	-1	-1	-1	0	-1	-1	-1	-1	0	-1	0	0	0	0
SPCC11E10.09c	0	0	0	0	0	0	0	0	0	0	0	0	0	0	0	0	0	0	0	1	0	0	0	0	0	0	0	0	0	0	0	0	0	0	0	0	0	0	0	0	0	0	1	0	0	0	0	0	0
SPAC20G4.04c	0	0	0	0	0	0	0	0	0	-1	0	0	0	0	0	-1	0	0	0	1	0	1	0	0	-1	0	0	0	0	0	0	0	0	1	0	0	0	0	0	-1	0	1	0	0	0	0	0	0	0
SPAC2F7.10	0	0	0	0	1	0	0	0	0	-1	0	0	0	0	0	0	0	0	0	-1	0	0	0	0	0	0	0	0	0	0	0	0	0	0	0	0	0	0	0	0	0	0	0	0	0	0	0	0	0
SPCC16C4.06c	0	0	0	0	0	0	0	0	0	1	0	0	0	0	-1	0	0	0	0	1	0	1	0	0	0	0	0	0	0	0	0	1	1	1	0	0	0	0	0	0	0	1	1	0	0	0	0	0	0
SPAC3C7.03c	0	-1	0	0	0	0	0	0	1	1	0	0	-1	0	1	-1	1	0	0	-1	1	-1	-1	1	-1	0	-1	0	1	1	0	0	-1	0	0	-1	0	-1	0	-1	-1	-1	0	0	0	0	0	0	0
SPAC328.04	0	0	0	0	0	0	0	0	0	1	0	0	0	0	0	0	0	0	0	0	0	-1	0	0	0	0	0	0	0	0	0	0	0	0	0	0	0	0	0	0	0	1	0	0	0	0	0	0	0
SPCC4F11.03c	-1	0	0	0	0	0	0	0	0	-1	0	0	0	0	1	0	0	-1	1	-1	0	-1	1	0	1	0	1	0	0	0	0	-1	-1	0	0	-1	0	-1	0	0	0	0	0	-1	0	0	0	0	0
SPAC637.03	0	0	0	0	0	0	0	0	0	-1	0	0	0	0	0	0	0	0	0	0	0	0	0	0	0	0	0	0	0	0	0	0	0	0	0	0	0	0	0	0	0	0	0	0	0	0	0	0	0
SPAC3A12.12	0	-1	0	-1	-1	0	0	0	0	1	0	0	0	-1	0	-1	0	-1	0	-1	-1	-1	-1	0	1	0	-1	0	0	0	0	0	0	0	0	-1	0	0	-1	-1	-1	-1	-1	0	-1	0	-1	-1	0
SPAC11D3.06	0	0	0	0	0	0	0	0	0	-1	0	0	0	0	0	0	0	0	0	0	0	1	0	0	0	0	0	0	0	0	0	0	0	0	0	0	0	0	0	0	0	0	0	1	0	0	0	0	0
SPBC119.16c	0	0	0	0	0	0	0	0	0	0	0	0	0	0	-1	0	0	0	0	0	0	0	0	0	0	0	0	0	0	0	0	1	1	0	0	0	0	0	0	0	0	1	0	0	0	0	0	0	0
SPAC3H1.13	0	0	0	0	0	0	0	0	0	0	0	0	0	0	-1	0	0	0	0	1	0	1	0	0	0	0	0	0	0	0	0	-1	0	-1	0	0	0	0	0	0	-1	0	0	0	0	1	0	0	0
SPAC15A10.03c	0	0	0	0	0	0	0	0	0	-1	0	0	0	0	0	0	0	0	0	0	0	0	0	0	-1	0	0	0	0	0	0	0	0	-1	0	0	0	0	0	0	0	0	0	0	0	0	0	0	0
SPBC16E9.07	0	0	0	0	0	0	0	0	0	-1	0	0	0	0	0	0	0	0	0	1	0	0	0	0	-1	0	0	0	0	0	0	0	0	0	0	0	0	0	0	0	0	0	0	0	0	0	0	0	0
SPAC11E3.12	0	0	0	0	0	0	0	0	0	0	0	0	0	0	0	0	0	0	0	0	0	0	0	0	1	0	0	0	0	0	0	0	0	0	0	0	0	0	0	0	0	0	0	0	0	0	0	0	0
SPCC1223.06	1	1	1	0	0	1	1	0	0	1	0	0	0	0	1	0	1	0	1	-1	0	-1	-1	0	0	0	0	-1	0	-1	0	-1	0	0	0	-1	0	-1	1	0	0	-1	0	0	0	-1	1	0	0
SPAC11D3.18c	0	0	0	0	0	0	0	0	0	-1	0	0	0	0	0	0	0	0	0	0	0	0	0	0	0	0	0	0	0	0	0	0	0	0	0	0	0	0	0	0	0	0	0	0	0	0	0	0	0
SPAC12B10.01c	0	0	0	0	0	0	0	0	0	1	0	0	0	0	1	0	0	-1	0	0	0	0	0	0	-1	0	-1	0	0	0	0	0	0	-1	0	0	0	0	0	0	0	1	0	1	1	0	0	0	0
SPAC1687.23c	0	0	0	0	0	0	0	0	0	0	0	0	0	0	0	0	0	0	0	1	0	0	0	0	0	0	0	0	0	0	0	0	0	0	0	0	0	0	0	0	0	0	0	0	0	0	0	0	0
SPCC1682.08c	0	0	0	0	0	0	0	0	0	0	0	0	0	0	1	0	0	0	0	1	0	1	0	0	1	0	0	0	0	0	0	0	0	0	0	0	0	0	0	0	0	0	0	0	0	0	1	0	1
SPAC13C5.03	0	0	0	0	0	0	0	0	0	-1	0	0	0	0	1	1	0	0	0	1	0	0	0	0	1	0	0	0	0	0	0	-1	0	0	0	0	0	0	0	0	0	1	0	0	0	0	0	0	0
SPAC19G12.15c	0	0	0	0	-1	1	0	-1	1	1	-1	-1	0	0	1	-1	1	0	0	-1	-1	-1	-1	0	1	0	-1	0	1	0	0	1	0	0	-1	-1	0	0	-1	-1	-1	-1	-1	-1	-1	-1	0	-1	-1
SPAC1952.02	0	0	0	0	0	0	0	0	1	0	0	0	0	0	1	-1	0	-1	0	-1	-1	-1	-1	0	1	-1	-1	0	0	0	0	-1	-1	-1	-1	-1	0	-1	0	-1	-1	-1	-1	0	-1	0	0	0	0
SPCC417.09c	0	0	0	0	0	0	0	0	0	-1	0	0	0	0	1	0	0	0	0	0	0	0	0	0	0	0	0	0	0	0	0	0	0	0	0	0	0	0	0	0	0	1	0	0	0	0	0	0	0
SPAC15A10.11	0	0	0	0	0	0	0	0	0	1	0	0	0	0	1	0	0	1	0	1	0	1	1	0	-1	0	0	0	0	0	0	0	-1	-1	0	1	0	0	-1	0	-1	1	1	1	1	0	0	0	0
SPAC22H10.11c	0	0	0	0	0	0	0	0	0	0	0	0	0	0	0	0	0	0	0	-1	-1	-1	-1	0	1	0	-1	0	0	0	0	-1	-1	-1	0	-1	0	0	0	-1	-1	0	-1	0	0	0	0	0	0
SPAC23C11.10	0	0	0	0	-1	0	0	0	0	-1	0	0	0	1	0	-1	0	0	0	1	0	0	0	0	-1	-1	0	0	0	0	0	0	0	0	0	-1	0	0	1	0	0	-1	1	0	0	-1	0	0	0
SPCC74.04	0	0	0	0	0	0	0	0	0	0	0	0	0	0	0	0	0	0	0	1	0	1	0	0	0	0	0	0	0	0	0	0	0	0	0	0	0	0	0	0	0	0	0	0	0	0	0	1	0
SPAC1705.02	0	0	0	0	0	0	0	0	0	1	0	0	0	0	0	0	0	0	0	1	0	0	0	0	-1	0	0	0	0	0	0	0	0	0	0	0	0	0	0	0	0	0	0	0	0	0	0	0	0
SPAC30D11.11	0	-1	0	0	-1	0	0	0	0	-1	0	0	0	0	0	1	0	0	0	-1	0	0	0	0	1	0	0	0	0	0	0	0	0	0	0	0	0	0	0	0	1	-1	0	0	0	0	0	0	0
SPAC2F3.12c	0	0	0	0	-1	0	0	0	0	-1	0	0	0	0	0	-1	0	0	0	1	0	0	0	0	-1	0	0	0	0	0	0	0	0	1	0	0	0	0	0	0	0	0	0	0	0	0	0	0	0
SPAC1006.03c	1	-1	1	1	0	1	1	1	1	-1	0	-1	-1	-1	0	-1	0	0	1	-1	0	NA	0	0	-1	0	-1	-1	0	0	0	1	1	1	0	-1	1	1	0	-1	1	1	1	1	-1	-1	0	1	1
SPAC17G6.02c	0	0	0	0	0	0	0	0	0	-1	0	0	0	0	0	0	0	0	-1	-1	0	0	0	0	0	0	0	0	0	0	0	0	1	0	0	0	0	0	0	0	0	0	0	0	0	0	0	0	0
SPAC56F8.02	-1	0	0	0	0	0	0	0	0	1	0	0	0	0	-1	0	0	0	0	-1	0	-1	-1	0	1	0	1	0	0	0	0	0	0	0	0	0	0	0	0	0	1	0	0	0	0	0	0	0	0
SPAC630.11	0	0	0	0	0	0	0	0	0	-1	0	0	0	0	1	0	0	0	0	1	0	-1	0	0	0	0	0	0	0	0	0	-1	0	0	0	0	0	0	0	0	0	0	0	0	0	0	0	0	0
SPAC1782.08c	0	-1	0	0	0	0	0	0	0	1	0	0	0	0	1	1	0	0	0	1	0	0	0	0	0	0	1	0	0	0	0	-1	-1	-1	0	0	0	0	-1	0	0	0	0	0	0	0	-1	0	0
SPAC1851.03	0	0	0	1	0	0	0	0	0	-1	0	0	0	0	0	0	1	-1	0	-1	-1	-1	-1	0	0	-1	-1	0	0	0	0	-1	-1	0	0	-1	0	-1	0	-1	-1	-1	-1	0	-1	0	0	0	0
SPAP8A3.13c	0	0	0	0	0	0	0	0	0	-1	0	0	0	0	0	0	0	0	0	-1	0	-1	-1	0	0	0	0	0	0	0	0	0	0	0	0	0	0	0	0	0	0	0	0	0	0	0	0	0	0
SPAC890.07c	0	0	0	0	-1	0	0	0	0	0	0	0	0	0	0	0	0	0	0	-1	0	1	0	0	0	0	0	0	0	0	0	0	0	0	0	0	0	0	0	0	0	0	0	0	0	0	0	0	0
SPAC1A6.01c	0	1	0	0	0	0	0	0	0	-1	0	0	0	0	-1	0	0	0	0	1	0	1	0	0	0	0	0	0	0	0	0	1	1	0	0	0	0	0	0	0	0	0	0	0	0	0	0	0	0
SPAC19B12.11c	1	1	1	1	0	1	0	0	1	-1	0	0	0	0	0	0	0	0	1	-1	0	1	0	0	-1	0	0	1	0	1	0	1	0	0	0	-1	0	0	1	0	1	0	1	-1	-1	-1	1	1	-1
SPBC12C2.08	0	0	0	0	0	0	0	0	0	1	0	0	0	0	0	0	0	0	0	-1	0	0	0	0	0	0	0	0	0	0	0	1	0	0	0	0	0	0	0	0	0	1	0	0	0	0	0	0	0
SPAPB17E12.08	0	0	0	0	-1	0	0	0	0	-1	0	-1	0	0	-1	0	0	0	0	0	0	1	0	0	1	0	0	0	1	1	0	1	1	0	0	-1	0	0	0	0	1	1	1	-1	0	0	0	0	0
SPAC30.01c	0	0	0	0	0	0	0	0	0	0	0	0	0	0	-1	-1	0	-1	0	-1	0	-1	-1	0	-1	0	0	-1	0	0	0	0	0	0	0	0	0	0	0	0	-1	-1	0	0	-1	0	0	0	0
SPAC20H4.10	1	0	1	0	0	0	0	0	0	-1	0	0	0	0	0	0	0	0	0	1	0	1	1	0	-1	0	0	0	0	0	0	0	0	0	0	0	0	0	0	0	0	0	0	0	0	0	0	0	0
SPBC18A7.02c	0	0	0	0	0	0	0	0	0	1	0	0	0	0	0	0	0	0	0	1	0	0	0	0	0	0	0	0	0	0	0	0	0	0	0	0	0	0	0	0	0	0	0	0	-1	1	0	0	0
SPAC19E9.01c	0	0	0	0	0	0	0	0	0	1	0	0	0	0	1	-1	0	0	1	1	0	0	0	0	0	0	-1	0	0	0	0	0	0	0	0	0	0	0	0	0	0	1	0	0	0	0	0	0	0
SPBC12C2.05c	0	0	0	0	0	0	0	0	0	-1	0	0	0	0	0	0	0	0	1	1	0	-1	0	0	0	0	0	0	0	0	0	0	0	0	0	0	0	0	0	0	0	0	0	0	0	0	0	0	0
SPAC56E4.06c	0	0	0	0	0	0	0	0	0	1	0	0	0	0	1	0	0	0	0	0	0	0	0	0	0	0	1	0	0	0	0	0	-1	-1	0	0	0	0	0	0	0	0	0	0	0	0	0	0	0
SPAC25H1.04	0	0	0	0	0	0	0	0	0	0	0	0	0	0	1	0	0	0	0	1	0	0	0	0	0	0	0	0	0	0	0	0	0	0	0	0	0	0	0	0	0	0	1	0	0	0	0	0	0
SPBC14F5.13c	0	0	0	0	0	0	0	0	0	1	0	0	0	0	1	1	0	0	0	1	0	0	0	0	0	0	0	0	0	0	0	0	0	0	0	0	0	0	0	0	0	1	0	0	0	0	0	0	0
SPAC3C7.02c	0	0	0	0	0	0	0	0	0	0	0	0	0	0	0	0	0	0	0	0	0	0	0	0	0	0	0	0	0	0	0	0	0	0	0	0	0	0	0	0	0	0	0	0	0	0	0	0	0
SPBC16H5.03c	0	0	0	0	-1	0	0	0	0	-1	0	0	0	0	0	-1	0	-1	0	1	0	1	0	0	1	0	0	0	0	0	0	0	0	0	0	-1	0	0	1	0	1	0	0	0	0	0	1	0	0
SPAC6F12.12	0	0	0	0	0	0	0	0	0	-1	0	0	0	0	0	0	0	0	0	-1	0	0	0	0	1	0	1	-1	0	0	0	0	0	0	0	0	0	0	0	0	1	0	-1	0	0	0	0	0	0
SPAC824.02	-1	1	-1	1	-1	-1	0	-1	-1	1	-1	-1	1	1	1	-1	-1	-1	-1	-1	-1	0	-1	1	1	1	-1	1	-1	-1	-1	1	-1	-1	-1	-1	-1	-1	-1	1	0	-1	-1	-1	-1	0	1	-1	-1
SPBC11B10.05c	0	0	0	0	0	0	0	0	0	0	0	0	0	0	-1	0	0	0	0	0	0	0	0	0	-1	0	0	0	0	0	0	0	0	0	0	0	0	0	0	0	0	0	1	0	0	0	0	0	0
SPBC17D11.04c	0	0	0	0	1	0	0	0	0	-1	0	0	0	0	-1	0	0	0	0	1	0	1	1	0	-1	0	0	0	0	-1	0	1	0	0	0	0	0	0	0	0	0	0	0	1	0	0	0	0	0
SPAC9.05	0	0	0	0	0	0	0	0	0	1	0	0	0	0	1	-1	0	0	0	1	0	0	0	0	0	0	0	0	0	0	0	0	0	0	0	0	0	0	0	0	0	1	0	0	0	0	0	0	0
SPBC18E5.07	-1	0	0	0	0	0	0	0	0	1	0	0	0	0	1	-1	0	-1	0	-1	-1	0	0	0	1	-1	-1	0	0	0	0	-1	-1	0	0	-1	0	0	0	0	0	-1	0	0	-1	0	0	0	0
SPBC19G7.10c	-1	-1	0	0	-1	0	0	0	1	1	-1	-1	0	1	-1	-1	1	-1	0	-1	0	-1	-1	0	1	0	-1	0	0	-1	0	-1	-1	-1	-1	-1	0	0	0	-1	-1	-1	-1	0	-1	-1	-1	-1	-1
SPACUNK4.13c	0	0	0	0	0	0	0	0	0	0	0	0	0	0	0	0	0	0	0	0	0	0	0	0	0	0	0	0	0	0	0	0	0	0	0	0	0	0	0	0	0	0	0	0	0	0	0	0	0
SPBC409.11	0	0	0	0	0	0	0	0	0	-1	0	0	0	0	0	0	0	0	0	0	0	1	0	0	0	0	0	0	0	0	0	0	0	0	0	0	0	0	0	0	0	0	0	0	0	0	0	0	0
SPBC21C3.03	-1	0	0	0	0	0	0	0	0	1	0	0	0	0	-1	0	0	0	0	0	0	1	0	0	0	0	0	0	0	0	0	0	0	0	0	0	0	0	-1	0	0	0	0	0	-1	0	0	0	0
SPBC1105.08	0	0	0	0	0	0	0	0	0	-1	0	0	0	0	0	0	0	0	0	-1	0	-1	0	0	-1	0	0	0	0	0	0	0	0	0	0	0	0	0	0	0	0	0	0	0	0	0	0	0	0
SPBC26H8.09c	1	1	0	0	0	0	0	0	0	1	0	0	0	0	0	0	0	0	0	0	0	-1	0	0	1	-1	1	0	0	0	0	0	0	0	0	0	0	0	1	0	0	0	0	-1	0	1	0	0	0
SPBC2D10.15c	0	0	0	0	0	0	0	0	0	0	1	0	0	0	1	0	0	1	1	0	0	1	0	0	0	0	0	0	0	0	0	0	0	0	0	0	0	0	0	0	1	1	0	0	1	0	0	0	0
SPBC1105.09	0	0	0	0	0	0	0	0	0	-1	0	0	0	0	0	0	0	0	0	1	0	1	0	0	0	0	0	0	0	0	0	0	0	0	0	0	0	0	0	0	0	0	0	0	0	0	0	0	0
SPAC6F6.01	0	0	0	0	-1	0	0	0	0	-1	0	0	0	0	1	0	0	-1	0	-1	-1	-1	0	-1	-1	0	-1	-1	-1	-1	-1	1	0	0	0	0	0	0	0	0	-1	0	-1	0	-1	0	0	0	0
SPAPYUG7.03c	0	1	0	1	0	1	0	0	1	1	0	0	0	0	0	-1	1	0	0	-1	0	-1	-1	0	1	0	0	0	0	-1	0	-1	-1	0	-1	-1	0	-1	1	-1	-1	-1	-1	-1	0	0	0	0	-1
SPBC359.06	0	0	0	0	0	0	0	0	0	1	0	0	0	0	0	0	0	0	0	1	0	1	0	0	1	0	0	0	0	0	0	0	0	0	0	0	0	0	0	0	1	0	0	0	0	0	0	0	0
SPBC21B10.08c	0	0	0	0	0	0	0	0	0	0	0	0	0	0	0	0	0	0	0	1	0	1	0	0	0	0	0	0	0	0	0	0	0	0	0	0	0	0	0	0	0	0	0	0	0	0	0	0	0
SPBC16E9.11c	0	0	0	0	0	0	0	0	0	-1	0	0	0	0	0	0	0	0	0	0	0	1	0	0	0	0	0	0	0	0	0	0	0	0	0	0	0	0	0	0	1	-1	0	0	0	0	0	0	0
SPBC4B4.07c	0	0	1	0	-1	1	0	1	1	-1	0	0	0	1	1	-1	0	0	0	-1	0	0	0	0	-1	-1	-1	-1	0	0	0	-1	-1	0	0	-1	-1	0	0	-1	0	-1	0	1	0	0	0	0	0
SPBC2G2.05	0	0	0	0	0	0	0	0	0	1	0	0	0	0	0	0	0	0	0	1	0	1	0	0	0	0	0	0	0	0	0	0	0	0	0	0	0	0	0	0	0	1	1	0	0	0	0	0	0
SPBC2D10.18	0	0	0	1	0	0	0	0	0	1	0	0	0	0	0	-1	0	-1	1	-1	0	0	0	0	-1	0	-1	0	0	0	0	-1	-1	0	0	-1	0	-1	0	-1	-1	-1	-1	-1	-1	0	0	0	0
SPBC609.02	0	0	0	0	0	0	0	0	0	1	0	0	0	0	-1	0	0	0	0	0	0	0	0	0	0	0	0	0	0	0	0	1	1	0	0	0	0	0	0	0	0	0	0	0	0	0	0	0	0
SPBC56F2.14	0	0	0	0	0	0	0	0	0	-1	0	0	0	0	-1	0	0	0	0	1	0	0	0	0	0	0	0	0	0	0	0	1	1	0	0	0	0	0	0	0	1	1	0	0	0	0	0	0	0
SPBC530.06c	0	0	0	0	0	0	0	0	0	1	0	0	0	0	0	0	0	0	0	0	0	-1	0	0	-1	0	0	0	0	0	0	0	0	0	0	0	0	0	0	0	0	-1	0	0	0	0	0	0	0
SPBC800.04c	1	-1	1	-1	-1	1	0	-1	-1	-1	-1	1	1	-1	1	1	1	1	1	-1	-1	NA	1	-1	-1	1	0	-1	-1	-1	-1	0	1	0	-1	-1	0	-1	0	-1	-1	-1	-1	1	NA	-1	0	1	1
SPBP4H10.08	0	0	0	0	0	0	0	0	0	1	0	0	0	0	0	0	0	0	0	1	0	0	0	0	0	0	0	0	0	0	0	0	0	0	0	0	0	0	0	0	0	0	0	0	0	0	0	0	0
SPCC1322.03	-1	0	0	0	0	0	0	0	0	1	0	0	0	0	1	0	0	0	-1	-1	0	-1	-1	0	1	0	0	0	0	0	0	1	0	0	0	0	0	0	0	0	1	1	0	0	0	0	0	0	0
SPBP16F5.05c	-1	0	0	0	0	1	0	1	0	-1	0	0	0	1	0	-1	0	0	0	-1	-1	-1	0	0	0	0	-1	0	0	0	0	-1	-1	0	0	-1	0	-1	-1	-1	-1	-1	-1	0	0	0	0	0	0
SPCC338.16	-1	0	0	0	-1	0	0	0	1	0	0	0	0	0	1	-1	0	-1	0	-1	-1	1	0	0	1	0	-1	0	0	0	0	0	0	0	0	-1	0	-1	-1	-1	-1	-1	0	0	-1	0	0	0	-1
SPBPB2B2.05	0	0	0	0	0	0	0	0	0	1	0	0	0	0	1	0	0	0	0	1	0	0	0	0	0	0	0	0	0	0	0	0	-1	0	0	0	0	0	0	0	0	1	0	0	0	0	0	0	1
SPAC1039.05c	0	0	0	0	0	0	0	0	0	0	0	0	0	0	0	1	0	0	0	1	0	-1	0	0	0	0	0	0	0	0	0	0	0	0	0	0	0	0	0	0	0	0	0	0	0	0	0	0	0
SPCP31B10.07	0	0	0	0	0	0	0	0	0	-1	-1	0	0	0	1	0	0	0	0	1	0	0	0	0	-1	0	0	0	0	0	0	0	0	0	0	0	0	0	0	0	-1	1	0	0	-1	0	1	0	0
SPAC22F8.11	1	0	0	0	-1	0	0	1	0	-1	0	0	0	0	0	0	0	0	1	0	1	1	1	-1	-1	0	1	0	1	1	0	-1	-1	0	0	1	0	-1	0	0	-1	-1	-1	1	-1	0	0	0	0
SPBC2F12.03c	0	0	0	0	0	0	0	0	0	1	0	0	0	0	1	1	0	1	0	1	0	1	1	0	-1	0	1	0	0	-1	0	0	0	0	0	0	0	0	0	0	0	0	0	0	0	0	0	0	0
SPCC18B5.05c	0	0	0	0	0	0	0	0	0	-1	0	0	0	0	0	0	0	0	0	0	0	1	0	0	1	0	0	0	0	0	0	0	0	0	0	0	0	0	0	0	0	0	0	0	0	0	0	0	0
SPAC23D3.03c	0	0	0	0	0	0	0	0	0	1	0	0	0	0	0	0	0	0	0	1	0	1	0	0	1	0	0	0	0	0	0	0	0	0	0	0	0	0	0	0	0	0	0	0	0	0	0	0	0
SPBC3E7.09	0	0	0	0	0	0	0	0	0	0	0	0	0	0	-1	0	0	0	0	0	0	1	0	0	0	0	0	0	0	0	0	0	0	0	0	0	0	0	0	0	0	0	0	0	-1	0	0	0	0
SPCC757.07c	0	0	0	0	0	0	0	0	0	0	0	0	0	0	0	0	0	0	0	0	0	0	0	0	-1	0	0	0	0	0	0	0	0	0	-1	0	0	0	0	0	0	0	0	-1	0	0	0	0	0
SPAC25G10.03	0	0	0	0	0	0	0	0	0	0	0	0	0	0	-1	-1	0	0	0	-1	-1	-1	0	0	1	-1	-1	0	0	0	0	0	0	-1	0	-1	0	0	0	-1	-1	-1	-1	0	-1	0	0	0	0
SPBC800.11	0	-1	0	0	0	0	0	0	0	0	0	0	0	0	0	0	0	0	0	1	0	0	1	0	0	0	0	0	0	0	0	0	0	0	0	0	0	0	0	0	0	1	0	0	0	0	0	0	0
SPAC1687.12c	-1	-1	0	0	0	0	0	-1	0	0	0	0	0	0	0	-1	0	-1	0	-1	-1	0	0	0	1	0	-1	0	0	0	0	-1	-1	-1	-1	-1	0	-1	-1	-1	-1	-1	-1	-1	-1	0	-1	0	0
SPAC27F1.05c	0	0	0	0	0	0	0	0	0	1	0	0	0	0	0	0	0	0	0	0	0	1	0	0	0	0	0	0	0	0	0	0	0	0	0	0	0	0	0	0	0	0	0	0	0	0	0	0	0
SPCC1223.02	0	0	0	0	0	0	0	0	0	0	0	0	0	0	0	0	0	0	0	-1	0	0	0	0	1	0	0	0	0	0	0	1	1	1	0	-1	0	0	0	0	0	-1	0	0	-1	0	0	0	0
SPAC212.08c	0	0	0	0	0	0	0	0	0	1	0	0	0	0	0	0	0	0	0	1	0	0	0	0	1	0	0	0	0	0	0	0	0	0	0	0	0	0	0	0	0	0	1	0	0	0	0	0	0
SPAC2G11.05c	0	0	0	0	0	0	0	0	0	1	0	0	0	0	0	0	0	0	0	0	0	0	0	0	0	0	0	0	0	0	0	0	0	0	0	0	0	0	0	0	0	0	0	0	0	0	0	0	0
SPCC1739.10	0	0	0	0	0	0	0	0	0	-1	0	0	0	0	0	0	0	0	0	1	0	0	0	0	1	0	0	0	0	0	0	1	0	1	0	0	0	0	0	0	0	0	1	0	0	0	0	0	0
SPAC3C7.09	0	0	0	0	0	0	0	0	0	0	0	0	0	0	0	0	0	0	0	0	0	0	0	0	0	0	0	0	0	0	0	0	0	0	0	0	0	0	0	0	0	0	0	0	0	0	0	0	0
SPAC328.06	0	0	0	0	0	0	0	0	0	-1	0	0	0	0	1	0	0	0	0	0	0	0	-1	0	1	0	0	0	0	0	0	0	0	0	0	0	0	0	0	0	1	0	0	0	0	0	0	0	0
SPCC4G3.10c	0	0	0	0	0	0	0	0	0	1	0	0	0	0	0	0	0	0	0	1	0	1	0	0	-1	0	0	0	0	0	0	1	0	0	0	0	0	0	0	0	0	1	1	0	0	0	0	0	0
SPAC644.11c	0	0	-1	0	0	0	0	0	0	-1	0	0	0	0	-1	0	0	0	0	0	0	0	0	0	0	0	0	0	0	0	0	0	0	0	0	0	0	0	0	0	0	1	0	0	0	0	0	0	0
SPAC3C7.04	1	1	1	1	1	1	0	0	1	0	0	1	0	0	1	0	0	0	0	0	-1	0	0	0	1	0	0	1	-1	0	0	1	0	1	0	0	0	0	1	0	1	-1	1	0	1	0	1	1	0
SPAC11E3.04c	0	0	0	0	0	0	0	0	0	-1	0	0	0	0	1	0	0	0	0	-1	0	-1	0	0	0	-1	0	0	0	0	0	0	0	0	0	0	0	0	0	-1	0	0	0	0	0	0	0	0	0
SPAC3H5.07	1	0	1	0	0	1	0	0	1	1	-1	-1	0	-1	-1	-1	0	0	1	-1	-1	-1	-1	0	-1	-1	-1	0	-1	1	1	0	-1	1	0	-1	0	0	1	0	-1	0	1	0	-1	0	1	1	1
SPAC15E1.05c	1	0	0	0	0	0	0	0	0	1	0	0	0	0	1	0	0	1	0	1	0	0	1	0	1	0	0	0	0	0	0	0	0	0	0	-1	0	0	0	0	0	0	0	0	0	0	1	0	0
SPBC1773.04	0	0	0	0	0	0	0	0	0	0	0	0	0	0	0	0	0	0	0	0	0	-1	0	0	1	0	0	0	0	0	0	0	0	0	0	0	0	0	0	0	0	1	0	0	0	0	0	0	0
SPAC1296.04	0	0	0	0	0	0	0	0	0	0	0	0	0	0	0	0	0	0	0	-1	0	-1	0	0	-1	0	0	-1	0	-1	0	-1	0	0	0	0	0	0	0	0	0	0	0	0	0	0	0	0	0
SPCC1223.13	0	0	0	0	0	0	0	0	0	-1	0	0	0	0	0	1	0	1	0	0	0	1	0	0	0	0	0	0	0	0	0	0	0	0	0	0	0	0	0	0	0	1	0	0	1	1	0	0	0
SPAC11E3.01c	0	1	0	0	0	0	0	0	0	1	1	0	0	0	-1	1	0	-1	0	-1	-1	1	-1	0	1	0	0	0	0	0	0	0	0	0	0	-1	0	0	0	0	0	-1	0	0	0	0	0	0	0
SPAC139.05	0	0	0	0	0	0	0	0	0	1	0	0	0	0	1	0	0	0	0	0	0	1	0	0	0	0	0	0	0	0	0	0	0	0	0	0	0	0	0	0	0	1	0	0	0	0	0	0	0
SPAC16A10.05c	0	0	0	0	-1	1	0	1	1	-1	1	0	0	0	1	-1	0	0	0	-1	0	1	0	0	1	1	-1	0	1	1	0	0	-1	0	0	-1	0	-1	0	0	-1	-1	-1	1	0	0	0	0	0
SPCC1795.01c	0	0	0	0	0	0	0	0	0	0	0	0	0	0	-1	0	0	0	0	1	0	1	0	0	0	0	0	0	0	0	0	0	0	0	0	0	0	0	0	0	0	1	0	0	0	0	0	0	0
SPAC13C5.07	0	0	0	0	0	0	0	0	1	-1	0	0	0	0	0	-1	1	-1	0	-1	-1	-1	0	0	-1	0	-1	0	-1	0	0	-1	-1	0	-1	-1	0	-1	0	-1	-1	-1	-1	0	-1	0	0	0	0
SPAC1B3.17	0	0	0	0	0	0	0	0	0	1	0	1	0	0	-1	0	0	0	0	0	0	0	0	0	1	0	0	0	0	0	0	1	0	0	0	0	0	0	0	0	0	1	0	1	1	0	0	0	0
SPAC19A8.11c	0	0	0	0	0	0	0	0	0	1	0	0	0	0	0	-1	0	0	0	-1	0	-1	-1	0	1	-1	-1	-1	0	0	0	0	0	-1	0	-1	0	-1	0	-1	-1	-1	-1	0	0	0	0	0	0
SPCC4B3.15	-1	-1	0	0	0	0	0	0	0	-1	0	0	0	0	0	-1	0	0	0	-1	-1	-1	-1	0	1	0	-1	0	0	0	0	-1	0	-1	0	-1	0	-1	-1	-1	-1	-1	-1	0	-1	-1	0	0	0
SPAC15A10.16	0	0	0	0	0	0	0	0	0	-1	0	0	0	0	1	0	0	0	0	-1	0	0	0	0	1	0	0	-1	0	0	0	0	0	0	0	0	0	0	0	0	1	1	0	0	0	0	0	0	0
SPAC23C4.05c	0	0	0	0	0	0	0	0	0	1	0	0	0	0	0	0	0	0	0	1	0	1	0	0	0	0	-1	0	0	0	0	0	0	0	0	0	0	0	0	0	0	0	0	0	0	0	0	0	0
SPAC23C4.16c	0	0	0	0	0	0	0	0	0	0	0	0	0	0	0	0	0	0	0	-1	0	0	0	0	-1	0	0	0	0	0	0	0	0	0	0	0	0	0	0	0	0	0	0	0	0	0	0	0	0
SPCC757.04	0	0	0	0	0	0	0	0	0	0	0	0	0	0	1	0	0	0	0	0	0	0	0	0	0	0	0	0	0	0	0	1	1	1	0	0	0	0	0	0	1	0	1	0	0	0	0	0	0
SPAC1782.01	0	0	0	0	0	0	0	0	0	-1	0	0	0	0	0	0	0	0	0	1	0	0	0	0	0	0	0	0	0	0	0	0	0	0	0	0	0	0	0	0	0	1	0	0	0	0	0	0	0
SPAC31G5.10	0	0	0	0	0	0	0	0	0	1	0	0	0	0	0	0	0	0	0	0	0	0	0	0	0	0	0	0	0	0	0	0	0	0	0	0	0	0	0	0	1	0	1	0	0	0	0	0	0
SPAC2F3.18c	0	0	0	0	0	0	0	0	0	0	0	0	0	0	-1	0	0	0	0	0	0	0	0	0	-1	0	0	0	0	0	0	0	0	0	0	0	0	0	0	0	0	-1	0	0	0	0	0	0	0
SPAC10F6.11c	0	0	0	0	0	0	0	0	0	0	0	0	0	0	1	0	0	0	0	0	0	1	0	0	1	0	0	0	0	0	0	0	0	0	0	0	0	0	0	0	1	0	0	0	0	0	0	0	0
SPAC17G6.05c	0	1	0	0	0	0	0	0	0	-1	0	0	0	0	-1	0	0	-1	-1	-1	0	-1	-1	0	-1	0	0	-1	0	0	0	1	0	0	0	0	0	0	0	0	-1	-1	1	-1	0	0	0	0	0
[truncated: 2,959 more rows]
[truncated: 80 more columns]

## Sheet: Hits per mutant
gene_id	sensitive	resistant	no_phenotype	total_phenotypes
SPBC17A3.05c	65	53	9	118
[truncated: 3,508 more rows]

## Sheet: Hits per condition
condition	sensitive	resistant	no_phenotype	total_phenotypes
[truncated: 131 more rows]

[truncated: 6 more sheets: Oxidative stress, Data for clustering, K-medoids clusters, GO enrichments, GO slims, KEGG]
